# Supplementary material for: RUNX1 Is a Driver of Renal Cell Carcinoma Correlating with Clinical Outcome
Source: Oxford University Press journal article supplement (doi:10.1158/0008-5472.can-19-3870), 2020-03-10
Supplement: 00085472can193870-sup-233785_2_supp_6129876_q6kclb.xlsx [file 00085472can193870-sup-233785_2_supp_6129876_q6kclb.xlsx]

## Sheet: Rank Fold Change Pos to Neg
Link	ensembl_gene_id	description	hgnc_symbol	Mean_CRISPR A3	Mean_pX	FoldChange	padj	Mean_CRISPR A1	Mean_pX	FoldChange	padj	Sig in both?	In same dir?	NRY35181220_S2	NRY35181220_S5	NRY35181220_S8	NRY35181220_S3	NRY35181220_S6	NRY35181220_S9	NRY35181220_S1	NRY35181220_S4	NRY35181220_S7
ENSG00000134769	ENSG00000134769	dystrobrevin alpha [Source:HGNC Symbol;Acc:HGNC:3057]	DTNA	1624.73	10.7289	73.224	1.58945e-159	1527.43	10.7289	68.8518	1.89226e-155	Y	Y	1568.78	1536.97	1476.54	1599.01	1666.92	1608.26	6.6518	15.6206	9.91427
ENSG00000106078	ENSG00000106078	cordon-bleu WH2 repeat protein [Source:HGNC Symbol;Acc:HGNC:22199]	COBL	480.495	0.716669	59.0356	1.19587e-18	13.3308	0.716669	2.36327	0.000254371	Y	Y	13.6515	9.78961	16.5512	478.614	520.343	442.528	1.10863	1.04137	0
ENSG00000151692	ENSG00000151692	ring finger protein 144A [Source:HGNC Symbol;Acc:HGNC:20457]	RNF144A	653.639	2.70418	50.1051	1.44943e-49	405.938	2.70418	31.5093	2.71683e-41	Y	Y	439.123	386.69	392.003	701.605	676.446	582.865	3.3259	2.08275	2.70389
ENSG00000165025	ENSG00000165025	spleen associated tyrosine kinase [Source:HGNC Symbol;Acc:HGNC:11491]	SYK	507.639	0.600865	47.7044	7.39534e-19	123.727	0.600865	12.5516	7.02582e-12	Y	Y	131.964	115.517	123.699	401.383	535.862	585.672	0	0	1.8026
ENSG00000119125	ENSG00000119125	guanine deaminase [Source:HGNC Symbol;Acc:HGNC:4212]	GDA	681.4	2.70603	46.5975	1.2911e-48	575.557	2.70603	39.6764	1.13669e-45	Y	Y	640.482	497.312	588.875	765.783	735.783	542.635	1.10863	5.20687	1.8026
ENSG00000197457	ENSG00000197457	stathmin 3 [Source:HGNC Symbol;Acc:HGNC:15926]	STMN3	3008.54	46.8767	46.261	2.98189e-253	3236.27	46.8767	49.6402	3.38076e-262	Y	Y	3467.48	3153.23	3088.11	3605.92	2788.85	2630.85	58.7576	45.8205	36.0519
ENSG00000103489	ENSG00000103489	xylosyltransferase 1 [Source:HGNC Symbol;Acc:HGNC:15516]	XYLT1	508.449	1.68708	41.0171	5.63461e-34	529.844	1.68708	42.6796	2.0718e-34	Y	Y	585.877	491.438	512.217	579.776	501.172	444.4	2.21727	1.04137	1.8026
ENSG00000140557	ENSG00000140557	ST8 alpha-N-acetyl-neuraminide alpha-2,8-sialyltransferase 2 [Source:HGNC Symbol;Acc:HGNC:10870]	ST8SIA2	353.798	1.0171	31.3311	2.17578e-21	119.243	1.0171	11.5185	2.58096e-14	Y	Y	120.588	120.412	116.73	457.947	338.679	264.769	1.10863	1.04137	0.901298
ENSG00000005249	ENSG00000005249	protein kinase cAMP-dependent type II regulatory subunit beta [Source:HGNC Symbol;Acc:HGNC:9392]	PRKAR2B	609.281	10.7495	28.7358	2.17284e-94	849.689	10.7495	39.7761	3.78167e-111	Y	Y	823.64	851.696	873.731	676.586	619.847	531.408	9.9777	11.4551	10.8156
ENSG00000112379	ENSG00000112379	ARFGEF family member 3 [Source:HGNC Symbol;Acc:HGNC:21213]	ARFGEF3	649.012	13.4331	26.8893	1.33933e-85	110.709	13.4331	5.11741	5.86199e-24	Y	Y	129.689	90.0644	112.374	748.379	670.055	528.602	9.9777	17.7034	12.6182
ENSG00000171004	ENSG00000171004	heparan sulfate 6-O-sulfotransferase 2 [Source:HGNC Symbol;Acc:HGNC:19133]	HS6ST2	4750.88	171.714	23.5291	4.75065e-263	2905.41	171.714	14.6362	6.03665e-190	Y	Y	2578.99	2967.23	3170	4051.9	5112.14	5088.61	141.905	174.951	198.285
ENSG00000170485	ENSG00000170485	neuronal PAS domain protein 2 [Source:HGNC Symbol;Acc:HGNC:7895]	NPAS2	1185.99	32.3125	23.1134	5.61925e-107	873.004	32.3125	17.3864	3.13884e-89	Y	Y	961.293	830.159	827.561	1560.94	1108.24	888.799	44.3454	29.1585	23.4337
ENSG00000155265	ENSG00000155265	golgin A7 family member B [Source:HGNC Symbol;Acc:HGNC:31668]	GOLGA7B	567.596	14.4763	22.4963	6.15807e-85	275.484	14.4763	11.3098	8.66068e-54	Y	Y	301.47	281.941	243.042	662.446	527.646	512.697	7.76044	23.9516	11.7169
ENSG00000106538	ENSG00000106538	retinoic acid receptor responder 2 [Source:HGNC Symbol;Acc:HGNC:9868]	RARRES2	2773.14	64.8184	22.2454	2.67917e-89	4904.63	64.8184	36.8564	1.05039e-118	Y	Y	5482.21	4890.89	4340.78	3750.6	2542.38	2026.46	69.8439	68.7307	55.8805
ENSG00000126970	ENSG00000126970	zinc finger C4H2-type containing [Source:HGNC Symbol;Acc:HGNC:24931]	ZC4H2	787.504	26.237	21.7757	1.44647e-132	329.363	26.237	9.32	7.79166e-71	Y	Y	374.278	305.436	308.375	827.785	775.037	759.689	22.1727	24.993	31.5454
ENSG00000165512	ENSG00000165512	zinc finger protein 22 [Source:HGNC Symbol;Acc:HGNC:13012]	ZNF22	1018.94	38.0207	20.9411	2.88656e-169	854.164	38.0207	17.6281	6.08136e-151	Y	Y	806.576	851.696	904.22	927.859	1032.47	1096.5	44.3454	29.1585	40.5584
ENSG00000173698	ENSG00000173698	adhesion G protein-coupled receptor G2 [Source:HGNC Symbol;Acc:HGNC:4516]	ADGRG2	419.685	8.11625	20.1948	2.4978e-56	489.301	8.11625	23.306	5.77424e-61	Y	Y	489.178	486.544	492.181	573.249	375.194	310.612	5.54317	12.4965	6.30908
ENSG00000168621	ENSG00000168621	glial cell derived neurotrophic factor [Source:HGNC Symbol;Acc:HGNC:4232]	GDNF	284.473	4.46037	18.6237	8.21665e-39	217.6	4.46037	14.5802	6.9612e-34	Y	Y	234.351	216.35	202.099	372.014	280.255	201.149	6.6518	3.12412	3.60519
ENSG00000164099	ENSG00000164099	serine protease 12 [Source:HGNC Symbol;Acc:HGNC:9477]	PRSS12	993.774	42.699	18.4016	5.28265e-161	923.065	42.699	17.1246	3.77644e-153	Y	Y	862.319	917.286	989.589	891.963	1082.68	1006.68	34.3676	46.8618	46.8675
ENSG00000105514	ENSG00000105514	RAB3D, member RAS oncogene family [Source:HGNC Symbol;Acc:HGNC:9779]	RAB3D	442.901	16.2718	17.0339	7.52398e-75	218.14	16.2718	8.69804	3.08638e-45	Y	Y	228.662	203.624	222.135	530.827	420.839	377.038	19.9554	13.5379	15.3221
ENSG00000164651	ENSG00000164651	Sp8 transcription factor [Source:HGNC Symbol;Acc:HGNC:19196]	SP8	165.889	1.38665	16.4271	2.5747e-18	39.5184	1.38665	4.72446	3.1636e-09	Y	Y	28.4406	43.0743	47.0403	120.741	192.618	184.309	2.21727	1.04137	0.901298
ENSG00000099139	ENSG00000099139	proprotein convertase subtilisin/kexin type 5 [Source:HGNC Symbol;Acc:HGNC:8747]	PCSK5	2555.73	139.624	16.2738	8.99395e-229	697.972	139.624	4.60332	4.50361e-67	Y	Y	790.649	641.219	662.049	2246.22	2776.07	2644.88	136.362	143.71	138.8
ENSG00000187123	ENSG00000187123	LY6/PLAUR domain containing 6 [Source:HGNC Symbol;Acc:HGNC:28751]	LYPD6	291.374	8.96929	16.1617	7.66266e-55	355.255	8.96929	19.569	1.63212e-61	Y	Y	360.627	335.784	369.354	335.03	293.035	246.057	11.0863	10.4137	5.40779
ENSG00000116711	ENSG00000116711	phospholipase A2 group IVA [Source:HGNC Symbol;Acc:HGNC:9035]	PLA2G4A	166.112	2.42802	15.8776	1.58331e-25	152.946	2.42802	14.6812	1.65514e-24	Y	Y	158.13	143.907	156.801	175.129	170.709	152.499	2.21727	4.1655	0.901298
ENSG00000099256	ENSG00000099256	phosphoribosyl transferase domain containing 1 [Source:HGNC Symbol;Acc:HGNC:23333]	PRTFDC1	186.846	3.37416	15.7238	1.61962e-32	386.435	3.37416	31.8292	1.66377e-45	Y	Y	379.967	392.563	386.776	189.27	194.444	176.824	4.43454	2.08275	3.60519
ENSG00000260896	ENSG00000260896	androgen receptor regulated long noncoding RNA 1 [Source:HGNC Symbol;Acc:HGNC:53032]	ARLNC1	424.472	15.1868	15.2403	4.9872e-52	54.8834	15.1868	2.47704	2.90756e-07	Y	Y	75.0832	46.0112	43.5559	513.423	401.668	358.326	8.86907	11.4551	25.2363
ENSG00000021645	ENSG00000021645	neurexin 3 [Source:HGNC Symbol;Acc:HGNC:8010]	NRXN3	154.284	2.40375	14.9585	3.56318e-24	102.044	2.40375	10.1574	1.406e-19	Y	Y	97.8357	111.602	96.694	155.55	170.709	136.594	3.3259	2.08275	1.8026
ENSG00000167080	ENSG00000167080	beta-1,4-N-acetyl-galactosaminyltransferase 2 [Source:HGNC Symbol;Acc:HGNC:24136]	B4GALNT2	414.662	6.49458	14.4774	1.29638e-40	1645.97	6.49458	47.1126	3.1879e-72	Y	Y	1894.14	1440.05	1603.73	577.6	366.066	300.321	8.86907	5.20687	5.40779
ENSG00000095777	ENSG00000095777	myosin IIIA [Source:HGNC Symbol;Acc:HGNC:7601]	MYO3A	112.099	0	13.9475	1.90233e-13	157.027	0	19.1923	8.45662e-15	Y	Y	154.717	167.402	148.961	121.829	104.069	110.398	0	0	0
ENSG00000267453	ENSG00000267453	long intergenic non-protein coding RNA 1835 [Source:HGNC Symbol;Acc:HGNC:52651]	LINC01835	145.244	1.94267	13.5557	5.66921e-21	85.7252	1.94267	8.41073	4.40169e-16	Y	Y	108.074	72.4431	76.6583	176.217	136.019	123.496	0	3.12412	2.70389
ENSG00000185565	ENSG00000185565	limbic system associated membrane protein [Source:HGNC Symbol;Acc:HGNC:6705]	LSAMP	217.007	6.84541	12.9438	2.13612e-39	370.866	6.84541	21.3856	5.92151e-53	Y	Y	360.627	325.994	425.976	264.326	213.614	173.082	4.43454	12.4965	3.60519
ENSG00000147027	ENSG00000147027	transmembrane protein 47 [Source:HGNC Symbol;Acc:HGNC:18515]	TMEM47	938.226	59.067	12.8425	1.11113e-116	604.55	59.067	8.41922	3.25129e-81	Y	Y	614.317	591.292	608.04	891.963	1087.24	835.471	39.9108	62.4825	74.8077
ENSG00000091129	ENSG00000091129	neuronal cell adhesion molecule [Source:HGNC Symbol;Acc:HGNC:7994]	NRCAM	1615.5	74.1071	12.4416	2.41284e-55	2147.21	74.1071	15.942	4.46749e-66	Y	Y	2367.4	2135.11	1939.11	2220.12	1458.79	1167.6	89.7993	73.9376	58.5843
ENSG00000123892	ENSG00000123892	RAB38, member RAS oncogene family [Source:HGNC Symbol;Acc:HGNC:9776]	RAB38	497.638	31.2973	12.4055	1.83e-86	220.866	31.2973	5.69008	1.28973e-41	Y	Y	234.351	218.308	209.939	553.67	454.615	484.629	41.0195	31.2412	21.6311
ENSG00000139915	ENSG00000139915	MAM domain containing glycosylphosphatidylinositol anchor 2 [Source:HGNC Symbol;Acc:HGNC:19835]	MDGA2	140.589	0.347125	11.9562	5.42378e-11	26.9779	0.347125	3.38646	4.68708e-06	Y	Y	21.6149	24.474	34.8447	62.0023	167.97	191.794	0	1.04137	0
ENSG00000114638	ENSG00000114638	uroplakin 1B [Source:HGNC Symbol;Acc:HGNC:12578]	UPK1B	107.751	0.647557	11.8302	3.86476e-11	133.325	0.647557	14.3434	5.00446e-12	Y	Y	149.029	142.928	108.019	124.005	114.11	85.1376	0	1.04137	0.901298
ENSG00000170290	ENSG00000170290	sarcolipin [Source:HGNC Symbol;Acc:HGNC:11089]	SLN	137.853	4.76266	11.3249	2.92076e-25	21.795	4.76266	2.31331	3.83124e-05	Y	Y	29.5782	16.6423	19.1646	162.076	120.5	130.981	4.43454	6.24825	3.60519
ENSG00000188818	ENSG00000188818	zinc finger DHHC-type containing 11 [Source:HGNC Symbol;Acc:HGNC:19158]	ZDHHC11	289.472	16.0193	11.2865	1.15584e-47	80.3621	16.0193	3.49512	4.90949e-14	Y	Y	68.2575	82.2327	90.5962	255.624	263.823	348.971	11.0863	13.5379	23.4337
ENSG00000092421	ENSG00000092421	semaphorin 6A [Source:HGNC Symbol;Acc:HGNC:10738]	SEMA6A	1045.52	78.5037	11.1835	6.20274e-114	536.532	78.5037	5.89672	3.19314e-61	Y	Y	490.316	607.935	511.346	907.192	1095.46	1133.92	63.1921	74.979	97.3401
ENSG00000145362	ENSG00000145362	ankyrin 2 [Source:HGNC Symbol;Acc:HGNC:493]	ANK2	292.506	17.847	10.8837	2.97712e-60	617.134	17.847	22.2304	2.96495e-98	Y	Y	664.373	590.313	596.715	254.536	343.244	279.738	19.9554	21.8689	11.7169
ENSG00000134755	ENSG00000134755	desmocollin 2 [Source:HGNC Symbol;Acc:HGNC:3036]	DSC2	207.998	10.9085	10.6675	5.54171e-51	1631.48	10.9085	79.8536	1.49835e-150	Y	Y	1558.55	1687.73	1648.15	200.148	224.569	199.278	18.8468	9.37237	4.50649
ENSG00000133019	ENSG00000133019	cholinergic receptor muscarinic 3 [Source:HGNC Symbol;Acc:HGNC:1952]	CHRM3	85.6959	0.300433	10.5483	7.71391e-10	73.2597	0.300433	9.11042	2.78981e-09	Y	Y	84.1842	76.3589	59.236	69.6166	98.5913	88.8799	0	0	0.901298
ENSG00000120162	ENSG00000120162	MOB kinase activator 3B [Source:HGNC Symbol;Acc:HGNC:23825]	MOB3B	155.625	7.95219	10.0493	2.22772e-35	201.368	7.95219	12.8001	6.89591e-42	Y	Y	220.699	198.729	184.677	147.935	154.277	164.662	9.9777	9.37237	4.50649
ENSG00000019505	ENSG00000019505	synaptotagmin 13 [Source:HGNC Symbol;Acc:HGNC:14962]	SYT13	1471	43.4374	9.91065	3.07513e-34	1591.62	43.4374	10.5361	9.98706e-36	Y	Y	1767.87	1517.39	1489.61	2158.12	1386.67	868.217	52.1058	52.0687	26.1376
ENSG00000134709	ENSG00000134709	hook microtubule tethering protein 1 [Source:HGNC Symbol;Acc:HGNC:19884]	HOOK1	549.714	47.3627	9.61998	3.30781e-88	284.654	47.3627	5.09548	2.42212e-45	Y	Y	327.636	246.698	279.629	554.757	574.203	520.181	45.454	41.655	54.9792
ENSG00000135525	ENSG00000135525	microtubule associated protein 7 [Source:HGNC Symbol;Acc:HGNC:6869]	MAP7	1129.78	104.735	9.60248	4.03526e-134	1055.66	104.735	8.99025	2.54963e-126	Y	Y	1142.17	1007.35	1017.46	1273.77	1120.11	995.455	117.515	102.055	94.6363
ENSG00000177494	ENSG00000177494	zinc finger BED-type containing 2 [Source:HGNC Symbol;Acc:HGNC:20710]	ZBED2	478.246	41.4656	9.43967	2.26335e-87	476.858	41.4656	9.41978	3.82156e-87	Y	Y	431.16	484.586	514.83	443.806	482.915	508.019	44.3454	32.2826	47.7688
ENSG00000127252	ENSG00000127252	HRAS like suppressor [Source:HGNC Symbol;Acc:HGNC:14922]	HRASLS	100.207	4.11325	8.97999	1.0419e-22	109.231	4.11325	9.7295	6.33154e-24	Y	Y	108.074	111.602	108.019	100.074	99.5041	101.042	6.6518	2.08275	3.60519
ENSG00000144218	ENSG00000144218	AF4/FMR2 family member 3 [Source:HGNC Symbol;Acc:HGNC:6473]	AFF3	716.568	64.6593	8.95723	3.79695e-73	577.689	64.6593	7.31521	2.63898e-60	Y	Y	568.812	604.998	559.257	905.016	700.18	544.506	60.9749	70.8135	62.1895
ENSG00000177614	ENSG00000177614	piggyBac transposable element derived 5 [Source:HGNC Symbol;Acc:HGNC:19405]	PGBD5	714.713	70.8384	8.49089	6.08665e-74	200.051	70.8384	2.55241	2.7516e-14	Y	Y	207.048	191.876	201.228	851.716	699.268	593.157	59.8662	89.5582	63.0908
ENSG00000135549	ENSG00000135549	cAMP-dependent protein kinase inhibitor beta [Source:HGNC Symbol;Acc:HGNC:9018]	PKIB	118.859	5.52602	8.4624	5.57382e-25	206.772	5.52602	14.0741	5.43845e-35	Y	Y	219.561	166.423	234.331	142.497	119.588	94.4934	5.54317	8.33099	2.70389
ENSG00000264230	ENSG00000264230	annexin A8 like 1 [Source:HGNC Symbol;Acc:HGNC:23334]	ANXA8L1	351.506	31.2387	8.45748	1.80242e-52	203.8	31.2387	5.07392	9.97451e-31	Y	Y	222.974	188.939	199.486	403.559	346.895	304.063	19.9554	45.8205	27.9402
ENSG00000198088	ENSG00000198088	nucleoporin 62 C-terminal like [Source:HGNC Symbol;Acc:HGNC:25960]	NUP62CL	220.379	18.9106	8.34726	2.1954e-44	123.48	18.9106	4.82889	4.06485e-25	Y	Y	129.689	105.728	135.023	204.499	222.743	233.895	17.7381	21.8689	17.1247
ENSG00000144583	ENSG00000144583	membrane associated ring-CH-type finger 4 [Source:HGNC Symbol;Acc:HGNC:29269]	MARCH4	998.608	108.091	8.32649	1.41187e-130	720.501	108.091	6.05432	2.31565e-93	Y	Y	748.557	719.536	693.409	1031.2	1057.12	907.511	94.2339	102.055	127.984
ENSG00000154639	ENSG00000154639	CXADR, Ig-like cell adhesion molecule [Source:HGNC Symbol;Acc:HGNC:2559]	CXADR	1165.26	116.573	8.27599	7.90282e-75	1156.86	116.573	8.21924	2.54725e-74	Y	Y	1122.84	1155.17	1192.56	1111.69	1307.25	1076.85	83.1475	98.9306	167.641
ENSG00000013725	ENSG00000013725	CD6 molecule [Source:HGNC Symbol;Acc:HGNC:1691]	CD6	294.824	27.882	8.2588	1.81288e-49	82.6664	27.882	2.52568	4.28852e-10	Y	Y	79.6337	81.2537	87.1117	313.275	281.168	290.029	29.9331	37.4895	16.2234
ENSG00000137642	ENSG00000137642	sortilin related receptor 1 [Source:HGNC Symbol;Acc:HGNC:11185]	SORL1	226.802	18.4479	8.21096	1.07444e-37	118.07	18.4479	4.51275	3.59795e-20	Y	Y	127.414	121.391	105.405	281.73	220.917	177.76	19.9554	21.8689	13.5195
ENSG00000115009	ENSG00000115009	C-C motif chemokine ligand 20 [Source:HGNC Symbol;Acc:HGNC:10619]	CCL20	338.639	32.0118	8.14903	1.26943e-48	102.318	32.0118	2.69155	2.12841e-11	Y	Y	98.9733	100.833	107.147	379.628	372.456	263.833	41.0195	27.0757	27.9402
ENSG00000109321	ENSG00000109321	amphiregulin [Source:HGNC Symbol;Acc:HGNC:651]	AREG	1195.39	127.49	8.11926	1.64542e-92	1277.3	127.49	8.65264	3.26044e-98	Y	Y	1184.27	1339.22	1308.42	1192.18	1210.48	1183.51	127.493	86.4341	168.543
ENSG00000065675	ENSG00000065675	protein kinase C theta [Source:HGNC Symbol;Acc:HGNC:9410]	PRKCQ	294.636	29.0576	8.08201	1.89936e-57	189.562	29.0576	5.30832	8.70639e-37	Y	Y	171.781	202.645	194.259	302.397	280.255	301.256	33.259	32.2826	21.6311
ENSG00000214402	ENSG00000214402	lipocalin like 1 [Source:HGNC Symbol;Acc:HGNC:34436]	LCNL1	174.788	12.8061	8.0802	2.29101e-34	218.528	12.8061	9.97242	8.09664e-41	Y	Y	194.534	191.876	269.175	189.27	144.235	190.858	13.3036	12.4965	12.6182
ENSG00000180815	ENSG00000180815	mitogen-activated protein kinase kinase kinase 15 [Source:HGNC Symbol;Acc:HGNC:31689]	MAP3K15	90.1613	4.09083	7.92902	2.8403e-18	31.8598	4.09083	3.24131	5.54932e-08	Y	Y	43.2297	24.474	27.8757	85.933	103.156	81.3953	5.54317	3.12412	3.60519
ENSG00000080224	ENSG00000080224	EPH receptor A6 [Source:HGNC Symbol;Acc:HGNC:19296]	EPHA6	59.3156	0.300433	7.57647	9.14031e-09	246.487	0.300433	28.6469	6.45387e-14	Y	Y	277.58	231.035	230.846	59.8268	65.7275	52.3924	0	0	0.901298
ENSG00000088538	ENSG00000088538	dedicator of cytokinesis 3 [Source:HGNC Symbol;Acc:HGNC:2989]	DOCK3	447.458	51.3196	7.56209	2.49423e-82	352.032	51.3196	5.98866	5.20302e-64	Y	Y	366.315	338.72	351.06	468.824	462.831	410.719	50.9972	55.1928	47.7688
ENSG00000121316	ENSG00000121316	phospholipase B domain containing 1 [Source:HGNC Symbol;Acc:HGNC:26215]	PLBD1	96.4438	4.99213	7.47422	1.3717e-18	33.4365	4.99213	3.0456	1.42727e-07	Y	Y	44.3673	25.453	30.4891	72.8799	99.5041	116.947	5.54317	3.12412	6.30908
ENSG00000165300	ENSG00000165300	SLIT and NTRK like family member 5 [Source:HGNC Symbol;Acc:HGNC:20295]	SLITRK5	80.4034	3.69886	7.39048	2.85757e-19	164.288	3.69886	14.3948	1.92177e-29	Y	Y	152.442	172.297	168.126	78.3187	71.2048	91.6867	3.3259	4.1655	3.60519
ENSG00000073756	ENSG00000073756	prostaglandin-endoperoxide synthase 2 [Source:HGNC Symbol;Acc:HGNC:9605]	PTGS2	141.74	11.6007	7.1711	3.03027e-28	143.556	11.6007	7.25184	1.86889e-28	Y	Y	163.818	137.055	129.796	168.603	139.671	116.947	17.7381	6.24825	10.8156
ENSG00000103067	ENSG00000103067	epithelial splicing regulatory protein 2 [Source:HGNC Symbol;Acc:HGNC:26152]	ESRP2	294.846	33.0787	7.10671	1.88587e-56	429.223	33.0787	10.2184	4.75428e-79	Y	Y	373.141	441.511	473.017	287.169	282.081	315.29	31.0417	31.2412	36.9532
ENSG00000109794	ENSG00000109794	family with sequence similarity 149 member A [Source:HGNC Symbol;Acc:HGNC:24527]	FAM149A	192.691	18.4476	7.08541	2.99268e-33	121.927	18.4476	4.66383	3.69177e-21	Y	Y	122.863	117.475	125.441	240.395	190.792	146.886	16.6295	19.7861	18.9273
ENSG00000272620	ENSG00000272620	AFAP1 antisense RNA 1 [Source:HGNC Symbol;Acc:HGNC:28141]	AFAP1-AS1	214.634	19.9535	6.94825	4.33583e-28	65.2632	19.9535	2.45963	5.20024e-07	Y	Y	60.2941	67.5483	67.9471	290.432	195.357	158.113	12.195	26.0344	21.6311
ENSG00000278266	ENSG00000278266	novel transcript		61.5496	0	6.8684	3.29925e-10	19.3902	0	2.986	1.01898e-06	Y	Y	23.8901	18.6003	15.6801	93.5473	61.1631	29.9385	0	0	0
ENSG00000146678	ENSG00000146678	insulin like growth factor binding protein 1 [Source:HGNC Symbol;Acc:HGNC:5469]	IGFBP1	217.168	16.5258	6.86627	1.42062e-24	186.77	16.5258	6.04305	9.79236e-22	Y	Y	229.8	177.192	153.317	319.801	205.398	126.303	23.2813	14.5792	11.7169
ENSG00000132563	ENSG00000132563	receptor accessory protein 2 [Source:HGNC Symbol;Acc:HGNC:17975]	REEP2	55.3447	0.669977	6.80849	2.29637e-08	71.1459	0.669977	8.45932	2.84734e-09	Y	Y	80.7713	65.5904	67.076	72.8799	53.86	39.2943	1.10863	0	0.901298
ENSG00000188153	ENSG00000188153	collagen type IV alpha 5 chain [Source:HGNC Symbol;Acc:HGNC:2207]	COL4A5	46.2747	0.69425	6.59234	1.50903e-07	11.7323	0.69425	2.32828	0.000971325	Y	Y	13.6515	13.7055	7.84005	44.5981	48.3827	45.8433	0	2.08275	0
ENSG00000177103	ENSG00000177103	DS cell adhesion molecule like 1 [Source:HGNC Symbol;Acc:HGNC:14656]	DSCAML1	307.852	38.1237	6.52823	3.50077e-43	129.273	38.1237	2.90684	2.76675e-14	Y	Y	136.515	114.538	136.765	360.048	289.384	274.124	36.5849	48.9446	28.8415
ENSG00000176658	ENSG00000176658	myosin ID [Source:HGNC Symbol;Acc:HGNC:7598]	MYO1D	5493.99	786.438	6.45891	1.45184e-104	3778.67	786.438	4.50384	6.10076e-68	Y	Y	4078.38	3537.96	3719.67	6529.82	5515.63	4436.51	727.264	822.686	809.365
ENSG00000137251	ENSG00000137251	tubulointerstitial nephritis antigen [Source:HGNC Symbol;Acc:HGNC:14599]	TINAG	76.4376	4.60016	6.37903	7.58078e-16	35.2707	4.60016	3.33308	2.74966e-08	Y	Y	28.4406	46.0112	31.3602	66.3533	68.4661	94.4934	3.3259	4.1655	6.30908
ENSG00000107317	ENSG00000107317	prostaglandin D2 synthase [Source:HGNC Symbol;Acc:HGNC:9592]	PTGDS	644.551	81.9699	6.24774	7.9082e-42	870.265	81.9699	8.24049	4.09337e-55	Y	Y	829.328	988.75	792.717	865.857	552.294	515.504	98.6684	89.5582	57.683
ENSG00000143512	ENSG00000143512	HHIP like 2 [Source:HGNC Symbol;Acc:HGNC:25842]	HHIPL2	856.85	122.585	6.21091	1.21386e-72	1525.25	122.585	10.8008	7.86251e-124	Y	Y	1672.31	1510.54	1392.92	987.686	870.889	711.975	138.579	129.13	100.044
ENSG00000103316	ENSG00000103316	crystallin mu [Source:HGNC Symbol;Acc:HGNC:2418]	CRYM	65.1322	1.80288	6.19664	1.70588e-11	36.8725	1.80288	3.96713	2.91516e-08	Y	Y	48.9178	38.1795	23.5202	90.284	62.076	43.0366	3.3259	2.08275	0
ENSG00000117013	ENSG00000117013	potassium voltage-gated channel subfamily Q member 4 [Source:HGNC Symbol;Acc:HGNC:6298]	KCNQ4	95.1454	6.6792	6.04278	3.16216e-16	38.397	6.6792	2.88498	4.4698e-07	Y	Y	51.1931	27.4109	36.5869	133.794	72.1177	79.5241	7.76044	4.1655	8.11168
ENSG00000224271	ENSG00000224271	uncharacterized LOC284930 [Source:NCBI gene;Acc:284930]		49.5531	1.71135	6.0221	9.99961e-11	31.6334	1.71135	4.13181	4.12595e-08	Y	Y	35.2664	35.2426	24.3913	54.388	46.557	47.7145	1.10863	3.12412	0.901298
ENSG00000172137	ENSG00000172137	calbindin 2 [Source:HGNC Symbol;Acc:HGNC:1435]	CALB2	327.59	41.3559	6.00073	8.86207e-34	270.745	41.3559	5.04595	1.10089e-27	Y	Y	313.984	229.077	269.175	432.928	312.206	237.637	43.2367	44.7791	36.0519
ENSG00000137343	ENSG00000137343	alpha tubulin acetyltransferase 1 [Source:HGNC Symbol;Acc:HGNC:21186]	ATAT1	114.806	11.6505	5.90708	6.961e-26	254.579	11.6505	12.4953	8.68313e-49	Y	Y	242.314	249.635	271.789	125.092	96.7655	122.561	6.6518	9.37237	18.9273
ENSG00000214049	ENSG00000214049	urothelial cancer associated 1 [Source:HGNC Symbol;Acc:HGNC:37126]	UCA1	290.144	37.5182	5.85419	1.53508e-31	145.479	37.5182	3.11562	1.61489e-13	Y	Y	201.36	117.475	117.601	320.889	286.645	262.897	31.0417	36.4481	45.0649
ENSG00000128872	ENSG00000128872	tropomodulin 2 [Source:HGNC Symbol;Acc:HGNC:11872]	TMOD2	68.7373	5.15619	5.73596	1.9612e-15	44.8533	5.15619	3.97871	1.09844e-10	Y	Y	38.6792	47.9691	47.9114	73.9677	62.076	70.1684	1.10863	6.24825	8.11168
ENSG00000174482	ENSG00000174482	leucine rich repeat and Ig domain containing 2 [Source:HGNC Symbol;Acc:HGNC:21207]	LINGO2	85.1787	6.44974	5.64931	1.79091e-15	50.8826	6.44974	3.69581	6.33642e-10	Y	Y	59.1565	42.0953	51.3959	121.829	78.5078	55.1991	6.6518	7.28962	5.40779
ENSG00000153898	ENSG00000153898	mucolipin 2 [Source:HGNC Symbol;Acc:HGNC:13357]	MCOLN2	102.25	11.2569	5.56357	5.35245e-21	90.8624	11.2569	4.97061	1.45623e-18	Y	Y	104.661	85.1696	82.7561	84.8452	105.894	116.012	9.9777	9.37237	14.4208
ENSG00000180537	ENSG00000180537	ring finger protein 182 [Source:HGNC Symbol;Acc:HGNC:28522]	RNF182	576.192	94.5221	5.54472	4.68193e-76	563.986	94.5221	5.42427	5.20569e-74	Y	Y	568.812	556.05	567.097	519.949	645.408	563.218	86.4734	91.6409	105.452
ENSG00000117602	ENSG00000117602	RCAN family member 3 [Source:HGNC Symbol;Acc:HGNC:3042]	RCAN3	1517.78	256.93	5.54311	2.84614e-102	1550.86	256.93	5.66126	8.47181e-105	Y	Y	1660.93	1504.66	1487	1720.84	1522.69	1309.81	269.398	249.93	251.462
ENSG00000256802	ENSG00000256802	uncharacterized LOC100130111 [Source:NCBI gene;Acc:100130111]		229.528	34.63	5.53039	9.49467e-38	110.374	34.63	2.76462	1.52118e-13	Y	Y	119.451	110.623	101.05	218.64	251.955	217.99	35.4763	39.5722	28.8415
ENSG00000248587	ENSG00000248587	GDNF antisense RNA 1 [Source:HGNC Symbol;Acc:HGNC:43592]	GDNF-AS1	138.056	14.633	5.50414	1.41775e-18	61.2066	14.633	2.7772	1.29106e-07	Y	Y	70.5327	46.0112	67.076	199.06	115.936	99.1713	12.195	14.5792	17.1247
ENSG00000159184	ENSG00000159184	homeobox B13 [Source:HGNC Symbol;Acc:HGNC:5112]	HOXB13	73.5705	7.11971	5.42542	7.48597e-17	66.0748	7.11971	4.91384	3.3291e-15	Y	Y	73.9456	68.5273	55.7515	79.4065	73.9434	67.3616	7.76044	7.28962	6.30908
ENSG00000144481	ENSG00000144481	transient receptor potential cation channel subfamily M member 8 [Source:HGNC Symbol;Acc:HGNC:17961]	TRPM8	413.898	67.983	5.41753	1.82563e-54	201.086	67.983	2.71011	1.10481e-18	Y	Y	218.424	187.96	196.872	429.665	453.702	358.326	69.8439	65.6066	68.4986
ENSG00000254486	ENSG00000254486	long intergenic non-protein coding RNA 2547 [Source:HGNC Symbol;Acc:HGNC:53582]	LINC02547	124.46	11.515	5.41005	1.1829e-16	79.3167	11.515	3.74607	5.08666e-11	Y	Y	86.4594	78.3169	73.1738	180.568	109.546	83.2665	12.195	18.7447	3.60519
ENSG00000152128	ENSG00000152128	transmembrane protein 163 [Source:HGNC Symbol;Acc:HGNC:25380]	TMEM163	562.123	93.217	5.39307	2.0962e-55	288.302	93.217	2.85712	2.517e-21	Y	Y	274.167	293.688	297.051	645.041	563.248	478.08	113.081	79.1444	87.4259
ENSG00000198691	ENSG00000198691	ATP binding cassette subfamily A member 4 [Source:HGNC Symbol;Acc:HGNC:34]	ABCA4	89.4637	9.15577	5.38309	1.81588e-17	68.4704	9.15577	4.26726	1.5159e-13	Y	Y	76.2208	57.7587	71.4316	114.215	83.0723	71.1039	7.76044	12.4965	7.21038
ENSG00000184860	ENSG00000184860	short chain dehydrogenase/reductase family 42E, member 1 [Source:HGNC Symbol;Acc:HGNC:29834]	SDR42E1	182.423	25.9811	5.36928	2.05689e-29	116.779	25.9811	3.5442	5.65443e-17	Y	Y	118.313	121.391	110.632	164.252	173.448	209.57	21.064	20.8275	36.0519
ENSG00000100433	ENSG00000100433	potassium two pore domain channel subfamily K member 10 [Source:HGNC Symbol;Acc:HGNC:6273]	KCNK10	44.1297	1.36423	5.36846	2.38577e-09	41.4653	1.36423	5.13464	4.68234e-09	Y	Y	37.5416	37.2005	49.6537	57.6513	41.9926	32.7452	1.10863	2.08275	0.901298
ENSG00000131018	ENSG00000131018	spectrin repeat containing nuclear envelope protein 1 [Source:HGNC Symbol;Acc:HGNC:17089]	SYNE1	1507.48	264.791	5.34056	1.37859e-95	1237.52	264.791	4.40564	1.5975e-74	Y	Y	1406.1	1167.9	1138.55	1626.2	1555.55	1340.68	261.638	255.137	277.6
ENSG00000106688	ENSG00000106688	solute carrier family 1 member 1 [Source:HGNC Symbol;Acc:HGNC:10939]	SLC1A1	1689.1	288.936	5.32834	2.60409e-65	1424.94	288.936	4.52946	3.59027e-53	Y	Y	1593.81	1302.02	1378.98	1980.81	1692.48	1394.01	311.526	315.536	239.745
ENSG00000105784	ENSG00000105784	RUN domain containing 3B [Source:HGNC Symbol;Acc:HGNC:30286]	RUNDC3B	68.0151	6.30966	5.30044	6.48044e-15	41.655	6.30966	3.46233	2.70639e-09	Y	Y	43.2297	38.1795	43.5559	54.388	76.6821	72.9751	6.6518	4.1655	8.11168
ENSG00000175874	ENSG00000175874	cellular repressor of E1A stimulated genes 2 [Source:HGNC Symbol;Acc:HGNC:14272]	CREG2	168.465	23.2121	5.28795	1.31505e-27	249.931	23.2121	7.64322	2.46746e-40	Y	Y	254.828	246.698	248.268	216.464	157.016	131.917	18.8468	29.1585	21.6311
ENSG00000166033	ENSG00000166033	HtrA serine peptidase 1 [Source:HGNC Symbol;Acc:HGNC:9476]	HTRA1	5474.62	968.569	5.26429	5.37687e-80	3868.15	968.569	3.77012	5.19316e-51	Y	Y	3821.28	4014.72	3768.45	6261.14	5438.04	4724.67	1097.55	1033.04	775.116
ENSG00000006047	ENSG00000006047	Y-box binding protein 2 [Source:HGNC Symbol;Acc:HGNC:17948]	YBX2	38.6092	0	5.26106	9.34247e-09	19.6256	0	3.22726	8.72461e-07	Y	Y	25.0277	14.6844	19.1646	56.5635	24.6478	34.6164	0	0	0
ENSG00000086619	ENSG00000086619	endoplasmic reticulum oxidoreductase 1 beta [Source:HGNC Symbol;Acc:HGNC:14355]	ERO1B	359.45	57.9671	5.2245	3.00984e-36	136.01	57.9671	2.11954	6.78241e-08	Y	Y	155.855	114.538	137.637	422.051	357.85	298.449	68.7353	44.7791	60.3869
ENSG00000006042	ENSG00000006042	transmembrane protein 98 [Source:HGNC Symbol;Acc:HGNC:24529]	TMEM98	2983.29	544.582	5.2163	1.11012e-113	1955.94	544.582	3.45807	1.24304e-63	Y	Y	1667.76	2051.9	2148.17	2773.79	3110.19	3065.89	516.623	559.218	557.903
ENSG00000170745	ENSG00000170745	potassium voltage-gated channel modifier subfamily S member 3 [Source:HGNC Symbol;Acc:HGNC:6302]	KCNS3	1887.04	346.314	5.20901	3.01428e-121	1367.81	346.314	3.80444	1.20789e-78	Y	Y	1280.96	1384.25	1438.21	1977.55	1986.43	1697.14	348.111	371.771	319.059
ENSG00000126561	ENSG00000126561	signal transducer and activator of transcription 5A [Source:HGNC Symbol;Acc:HGNC:11366]	STAT5A	304.249	51.0207	5.10589	1.41953e-42	287.465	51.0207	4.83985	9.20864e-40	Y	Y	313.984	265.298	283.113	355.697	285.732	271.318	45.454	56.2342	51.374
ENSG00000236924	ENSG00000236924	novel transcript		48.9983	3.48996	5.10309	2.38093e-11	25.4852	3.48996	2.99191	1.49053e-06	Y	Y	23.8901	26.4319	26.1335	44.5981	58.4244	43.9722	5.54317	3.12412	1.8026
ENSG00000262160	ENSG00000262160	novel transcript, antisense to NFATC3		57.4996	4.57774	5.09969	9.38415e-14	72.6918	4.57774	6.23767	2.16371e-16	Y	Y	89.8723	64.6114	63.5916	58.739	52.9472	60.8126	2.21727	5.20687	6.30908
ENSG00000144476	ENSG00000144476	atypical chemokine receptor 3 [Source:HGNC Symbol;Acc:HGNC:23692]	ACKR3	539.863	95.9397	5.06731	1.96441e-51	232.098	95.9397	2.2722	3.64398e-13	Y	Y	203.635	265.298	227.362	587.39	554.119	478.08	94.2339	112.468	81.1168
ENSG00000198914	ENSG00000198914	POU class 3 homeobox 3 [Source:HGNC Symbol;Acc:HGNC:9216]	POU3F3	1251.63	237.408	5.03977	4.77981e-114	1150.51	237.408	4.64028	2.99843e-102	Y	Y	1085.29	1172.8	1193.43	1154.11	1322.77	1278	243.899	252.013	216.311
ENSG00000227706	ENSG00000227706	novel transcript		301.773	50.0525	4.99955	1.12407e-33	248.42	50.0525	4.16147	1.83757e-26	Y	Y	306.021	223.203	216.037	330.679	255.607	319.032	45.454	61.4411	43.2623
ENSG00000065621	ENSG00000065621	glutathione S-transferase omega 2 [Source:HGNC Symbol;Acc:HGNC:23064]	GSTO2	278.65	47.9513	4.97492	2.97436e-41	418.946	47.9513	7.35379	6.61525e-64	Y	Y	408.407	442.49	405.941	301.309	283.906	250.735	43.2367	64.5652	36.0519
ENSG00000102053	ENSG00000102053	zinc finger CCCH-type containing 12B [Source:HGNC Symbol;Acc:HGNC:17407]	ZC3H12B	88.726	10.6601	4.97411	2.83836e-16	56.4466	10.6601	3.36468	4.57812e-10	Y	Y	50.0555	54.8218	64.4627	75.0554	102.243	88.8799	8.86907	17.7034	5.40779
ENSG00000117477	ENSG00000117477	coiled-coil domain containing 181 [Source:HGNC Symbol;Acc:HGNC:28051]	CCDC181	35.9878	1.0171	4.91392	1.10688e-07	27.4272	1.0171	3.94752	1.33908e-06	Y	Y	35.2664	23.4951	23.5202	42.4226	35.6024	29.9385	1.10863	1.04137	0.901298
ENSG00000130508	ENSG00000130508	peroxidasin [Source:HGNC Symbol;Acc:HGNC:14966]	PXDN	429.713	72.5228	4.88089	1.42146e-30	204.543	72.5228	2.47614	2.08386e-10	Y	Y	219.561	208.519	185.548	568.898	382.498	337.744	54.3231	81.2272	82.0181
ENSG00000149380	ENSG00000149380	prolyl 4-hydroxylase subunit alpha 3 [Source:HGNC Symbol;Acc:HGNC:30135]	P4HA3	177.759	29.3562	4.87025	3.36397e-32	370.411	29.3562	9.81288	4.53787e-66	Y	Y	375.416	361.237	374.58	194.709	192.618	145.95	35.4763	29.1585	23.4337
ENSG00000260658	ENSG00000260658	novel transcript		30.4272	0	4.85287	2.88303e-08	27.3204	0	4.46987	6.12533e-08	Y	Y	20.4772	36.2216	25.2624	29.3695	31.038	30.8741	0	0	0
ENSG00000085563	ENSG00000085563	ATP binding cassette subfamily B member 1 [Source:HGNC Symbol;Acc:HGNC:40]	ABCB1	1550.28	303.409	4.84119	9.67722e-94	1375.09	303.409	4.3115	3.40125e-80	Y	Y	1175.17	1459.63	1490.48	1572.9	1584.76	1493.18	310.417	278.047	321.763
ENSG00000111110	ENSG00000111110	protein phosphatase, Mg2+/Mn2+ dependent 1H [Source:HGNC Symbol;Acc:HGNC:18583]	PPM1H	882.563	158.66	4.735	3.98518e-35	1408.12	158.66	7.2998	4.75448e-57	Y	Y	1605.19	1373.48	1245.7	1147.59	888.234	611.868	147.448	184.323	144.208
ENSG00000213213	ENSG00000213213	coiled-coil domain containing 183 [Source:HGNC Symbol;Acc:HGNC:28236]	CCDC183	90.6098	9.68411	4.69381	8.99006e-14	69.7908	9.68411	3.79167	9.14386e-11	Y	Y	89.8723	56.7797	62.7204	131.619	80.3336	59.877	14.4122	8.33099	6.30908
ENSG00000002587	ENSG00000002587	heparan sulfate-glucosamine 3-sulfotransferase 1 [Source:HGNC Symbol;Acc:HGNC:5194]	HS3ST1	126.684	20.7863	4.6036	2.23924e-22	134.242	20.7863	4.86416	7.28286e-24	Y	Y	136.515	123.349	142.863	137.058	123.239	119.754	17.7381	30.1999	14.4208
ENSG00000115919	ENSG00000115919	kynureninase [Source:HGNC Symbol;Acc:HGNC:6469]	KYNU	613.227	124.477	4.59735	2.2373e-62	385.475	124.477	2.9343	1.75196e-30	Y	Y	349.251	431.722	375.452	575.425	628.063	636.193	139.688	122.882	110.86
ENSG00000078900	ENSG00000078900	tumor protein p73 [Source:HGNC Symbol;Acc:HGNC:12003]	TP73	30.6226	0.369545	4.55743	1.90388e-06	30.0326	0.369545	4.51019	2.16966e-06	Y	Y	27.303	32.3057	30.4891	40.2471	31.038	20.5827	1.10863	0	0
ENSG00000107518	ENSG00000107518	attractin like 1 [Source:HGNC Symbol;Acc:HGNC:29063]	ATRNL1	197.417	36.1285	4.53581	2.88362e-32	365.645	36.1285	8.1774	4.77907e-62	Y	Y	382.242	359.279	355.416	229.517	199.008	163.726	39.9108	33.324	35.1506
ENSG00000138792	ENSG00000138792	glutamyl aminopeptidase [Source:HGNC Symbol;Acc:HGNC:3355]	ENPEP	1258.64	268.04	4.52184	1.74334e-118	923.494	268.04	3.33769	3.36848e-74	Y	Y	891.897	897.707	980.878	1281.38	1267.99	1226.54	248.334	279.088	276.698
ENSG00000077585	ENSG00000077585	G protein-coupled receptor 137B [Source:HGNC Symbol;Acc:HGNC:11862]	GPR137B	599.179	124.251	4.51438	1.6979e-72	672.012	124.251	5.04619	6.05764e-84	Y	Y	687.125	692.125	636.787	604.794	644.495	548.249	118.624	127.048	127.083
ENSG00000184060	ENSG00000184060	ArfGAP with dual PH domains 2 [Source:HGNC Symbol;Acc:HGNC:16487]	ADAP2	137.672	23.4419	4.46417	3.48574e-23	237.466	23.4419	7.44007	1.19927e-40	Y	Y	241.176	252.572	218.65	170.778	115.936	126.303	23.2813	28.1171	18.9273
ENSG00000122877	ENSG00000122877	early growth response 2 [Source:HGNC Symbol;Acc:HGNC:3239]	EGR2	90.9087	11.5352	4.45473	9.71733e-14	67.8098	11.5352	3.50984	3.34405e-10	Y	Y	40.9545	91.0434	71.4316	117.478	77.595	77.653	12.195	12.4965	9.91427
ENSG00000082512	ENSG00000082512	TNF receptor associated factor 5 [Source:HGNC Symbol;Acc:HGNC:12035]	TRAF5	154.225	28.3855	4.42433	2.98177e-28	253.809	28.3855	7.10675	1.16278e-48	Y	Y	282.131	238.866	240.428	164.252	151.538	146.886	31.0417	27.0757	27.0389
ENSG00000140379	ENSG00000140379	BCL2 related protein A1 [Source:HGNC Symbol;Acc:HGNC:991]	BCL2A1	429.672	90.4769	4.41853	1.02112e-57	263.614	90.4769	2.75478	3.95551e-26	Y	Y	252.553	260.404	277.886	439.455	411.71	437.851	93.1252	92.6823	85.6233
ENSG00000164181	ENSG00000164181	ELOVL fatty acid elongase 7 [Source:HGNC Symbol;Acc:HGNC:26292]	ELOVL7	511.604	107.927	4.38661	5.44911e-61	527.378	107.927	4.51532	1.90558e-63	Y	Y	523.307	525.702	533.124	482.965	554.119	497.728	98.6684	98.9306	126.182
ENSG00000184012	ENSG00000184012	transmembrane serine protease 2 [Source:HGNC Symbol;Acc:HGNC:11876]	TMPRSS2	367.34	41.1457	4.37644	1.39268e-13	409.438	41.1457	4.75445	7.36488e-15	Y	Y	470.976	398.437	358.9	554.757	303.077	244.186	54.3231	44.7791	24.335
ENSG00000166394	ENSG00000166394	cytochrome b5 reductase 2 [Source:HGNC Symbol;Acc:HGNC:24376]	CYB5R2	36.4746	1.33995	4.36777	5.74298e-08	34.2958	1.33995	4.14457	1.19623e-07	Y	Y	51.1931	26.4319	25.2624	45.6859	32.8638	30.8741	2.21727	0	1.8026
ENSG00000166321	ENSG00000166321	nudix hydrolase 13 [Source:HGNC Symbol;Acc:HGNC:18827]	NUDT13	172.014	31.255	4.36127	4.00685e-23	118.565	31.255	3.0897	8.13694e-14	Y	Y	136.515	115.517	103.663	184.919	153.364	177.76	21.064	31.2412	41.4597
ENSG00000188906	ENSG00000188906	leucine rich repeat kinase 2 [Source:HGNC Symbol;Acc:HGNC:18618]	LRRK2	33.5005	2.0342	4.3593	5.00335e-08	13.1652	2.0342	2.18228	0.000821887	Y	Y	14.7891	10.7686	13.9379	35.8961	35.6024	29.0029	2.21727	2.08275	1.8026
ENSG00000163359	ENSG00000163359	collagen type VI alpha 3 chain [Source:HGNC Symbol;Acc:HGNC:2213]	COL6A3	105383	23658.4	4.3502	2.34032e-158	80962.3	23658.4	3.3559	2.26721e-107	Y	Y	85976	77345.7	79565.2	116100	100959	99089	23313.5	24531.7	23130
ENSG00000128655	ENSG00000128655	phosphodiesterase 11A [Source:HGNC Symbol;Acc:HGNC:8773]	PDE11A	84.0938	11.0763	4.32017	9.92253e-13	51.6019	11.0763	2.8965	1.7627e-07	Y	Y	51.1931	46.9901	56.6226	101.162	93.114	58.0058	9.9777	18.7447	4.50649
ENSG00000162981	ENSG00000162981	family with sequence similarity 84 member A [Source:HGNC Symbol;Acc:HGNC:20743]	FAM84A	55.2963	6.05592	4.28697	2.08858e-12	98.6558	6.05592	7.14125	5.45548e-20	Y	Y	96.6981	100.833	98.4362	77.2309	46.557	42.101	6.6518	5.20687	6.30908
ENSG00000230426	ENSG00000230426	endogenous retrovirus group MER61 member 1 [Source:HGNC Symbol;Acc:HGNC:27919]	ERVMER61-1	65.0055	8.73583	4.28036	2.78975e-13	66.5746	8.73583	4.34796	1.71729e-13	Y	Y	80.7713	59.7166	59.236	63.0901	74.8563	57.0703	11.0863	5.20687	9.91427
ENSG00000196611	ENSG00000196611	matrix metallopeptidase 1 [Source:HGNC Symbol;Acc:HGNC:7155]	MMP1	1422.43	169.385	4.26015	6.61795e-12	527.627	169.385	2.08146	0.000594478	Y	Y	461.875	623.598	497.408	1793.72	1283.51	1190.06	286.028	96.8478	125.28
ENSG00000145911	ENSG00000145911	NEDD4 binding protein 3 [Source:HGNC Symbol;Acc:HGNC:29852]	N4BP3	1520.92	324.527	4.25061	7.22222e-40	744.501	324.527	2.16906	8.74448e-12	Y	Y	865.732	704.852	662.92	1803.51	1457.87	1301.39	378.044	346.778	248.758
ENSG00000152527	ENSG00000152527	pleckstrin homology, MyTH4 and FERM domain containing H2 [Source:HGNC Symbol;Acc:HGNC:30506]	PLEKHH2	98.7996	16.9228	4.24972	1.12307e-19	155.735	16.9228	6.48352	8.66088e-32	Y	Y	170.644	153.697	142.863	96.8106	100.417	99.1713	12.195	18.7447	19.8285
ENSG00000145687	ENSG00000145687	single stranded DNA binding protein 2 [Source:HGNC Symbol;Acc:HGNC:15831]	SSBP2	123.149	23.1639	4.21264	4.57422e-22	148.35	23.1639	5.01769	1.86807e-27	Y	Y	149.029	148.802	147.219	129.443	130.542	109.463	24.3899	27.0757	18.026
ENSG00000127561	ENSG00000127561	synaptogyrin 3 [Source:HGNC Symbol;Acc:HGNC:11501]	SYNGR3	85.7773	13.1775	4.21061	4.0547e-14	61.9841	13.1775	3.17865	1.26019e-09	Y	Y	71.6703	48.948	65.3338	103.337	90.3753	63.6193	12.195	15.6206	11.7169
ENSG00000196460	ENSG00000196460	RFX family member 8, lacking RFX DNA binding domain [Source:HGNC Symbol;Acc:HGNC:37253]	RFX8	142.928	21.4258	4.20428	1.01726e-13	82.0656	21.4258	2.6633	4.90126e-07	Y	Y	95.5604	62.6535	87.9828	201.236	142.41	85.1376	19.9554	14.5792	29.7428
ENSG00000172031	ENSG00000172031	epoxide hydrolase 4 [Source:HGNC Symbol;Acc:HGNC:23758]	EPHX4	27.0345	0.669977	4.19609	4.61729e-06	50.6251	0.669977	7.06188	4.8765e-08	Y	Y	48.9178	48.948	54.0093	22.843	27.3865	30.8741	1.10863	0	0.901298
ENSG00000006788	ENSG00000006788	myosin heavy chain 13 [Source:HGNC Symbol;Acc:HGNC:7571]	MYH13	28.7309	0.994682	4.1642	1.13871e-06	20.6854	0.994682	3.25512	1.61434e-05	Y	Y	18.202	26.4319	17.4223	32.6328	28.2993	25.2606	0	2.08275	0.901298
ENSG00000258734	ENSG00000258734	transmembrane protein 98 (TMEM98) pseudogene		156.631	31.6475	4.10463	7.89773e-23	98.495	31.6475	2.66902	2.69236e-11	Y	Y	95.5604	98.875	101.05	146.848	139.671	183.373	29.9331	34.3654	30.6441
ENSG00000179314	ENSG00000179314	WSC domain containing 1 [Source:HGNC Symbol;Acc:HGNC:29060]	WSCD1	5647.61	1315.7	4.06425	4.71904e-63	4682.01	1315.7	3.39193	7.8491e-48	Y	Y	3878.16	5442.04	4725.81	5031.98	5756.63	6154.23	1218.39	1323.59	1405.12
ENSG00000280351	ENSG00000280351	uncharacterized LOC100129503 [Source:NCBI gene;Acc:100129503]		56.3384	8.11625	4.02934	1.76776e-11	40.0874	8.11625	3.01859	7.81524e-08	Y	Y	35.2664	44.0532	40.9425	54.388	55.6858	58.9414	5.54317	12.4965	6.30908
ENSG00000100505	ENSG00000100505	tripartite motif containing 9 [Source:HGNC Symbol;Acc:HGNC:16288]	TRIM9	2465.42	590.797	4.02429	1.86486e-93	3359.87	590.797	5.45152	1.68885e-139	Y	Y	3302.52	3256.02	3521.06	2777.05	2435.57	2183.64	609.749	589.418	573.225
ENSG00000206077	ENSG00000206077	zinc finger DHHC-type containing 11B [Source:HGNC Symbol;Acc:HGNC:32962]	ZDHHC11B	28.6295	1.29511	4.01016	9.31089e-07	12.3878	1.29511	2.23101	0.000826892	Y	Y	13.6515	7.83169	15.6801	30.4573	28.2993	27.1318	0	2.08275	1.8026
ENSG00000182636	ENSG00000182636	necdin, MAGE family member [Source:HGNC Symbol;Acc:HGNC:7675]	NDN	145.741	30.5376	4.00585	2.03155e-15	1.90297	30.5376	-3.83026	1.28995e-08	Y		1.13762	1.95792	2.61335	129.443	151.538	156.242	35.4763	35.4067	20.7298
ENSG00000177283	ENSG00000177283	frizzled class receptor 8 [Source:HGNC Symbol;Acc:HGNC:4046]	FZD8	1664.9	388.823	3.9812	2.20196e-47	2028.16	388.823	4.80929	2.73437e-61	Y	Y	2148.97	2109.66	1825.86	1973.2	1709.83	1311.68	400.217	416.55	349.703
ENSG00000065413	ENSG00000065413	ankyrin repeat domain 44 [Source:HGNC Symbol;Acc:HGNC:25259]	ANKRD44	381.905	87.8724	3.97166	1.64682e-42	335.221	87.8724	3.5027	6.76404e-35	Y	Y	329.911	322.078	353.674	363.312	403.494	378.909	67.6267	96.8478	99.1427
ENSG00000108771	ENSG00000108771	DExH-box helicase 58 [Source:HGNC Symbol;Acc:HGNC:29517]	DHX58	311.589	57.4713	3.97002	3.27452e-15	188.503	57.4713	2.59163	9.1354e-08	Y	Y	246.864	172.297	146.348	466.649	250.13	217.99	62.0835	69.7721	40.5584
ENSG00000204161	ENSG00000204161	transmembrane protein 273 [Source:HGNC Symbol;Acc:HGNC:27274]	TMEM273	182.707	39.1085	3.93772	5.57382e-25	235.431	39.1085	4.98722	3.89571e-34	Y	Y	230.938	258.446	216.908	153.374	190.792	203.956	41.0195	31.2412	45.0649
ENSG00000222032	ENSG00000222032	novel protein (LOC728009)		37.2072	3.9993	3.90155	1.38704e-08	19.6346	3.9993	2.36833	0.000154955	Y	Y	18.202	21.5371	19.1646	41.3349	32.8638	37.4231	3.3259	4.1655	4.50649
ENSG00000073350	ENSG00000073350	LLGL2, scribble cell polarity complex component [Source:HGNC Symbol;Acc:HGNC:6629]	LLGL2	403.733	95.6363	3.89307	1.39913e-43	292.701	95.6363	2.8537	1.31797e-25	Y	Y	317.397	274.109	286.598	439.455	380.672	391.072	83.1475	101.013	102.748
ENSG00000135925	ENSG00000135925	Wnt family member 10A [Source:HGNC Symbol;Acc:HGNC:13829]	WNT10A	61.7242	9.96397	3.87209	3.39616e-12	69.0974	9.96397	4.27358	1.00089e-13	Y	Y	64.8446	83.2117	59.236	64.1778	62.9889	58.0058	11.0863	12.4965	6.30908
ENSG00000110675	ENSG00000110675	ELMO domain containing 1 [Source:HGNC Symbol;Acc:HGNC:25334]	ELMOD1	246.788	56.1281	3.84672	8.39289e-29	246.667	56.1281	3.85143	9.1867e-29	Y	Y	221.837	243.761	274.402	244.746	272.952	222.668	45.454	56.2342	66.696
ENSG00000127585	ENSG00000127585	F-box and leucine rich repeat protein 16 [Source:HGNC Symbol;Acc:HGNC:14150]	FBXL16	55.3978	5.52573	3.84545	1.80845e-09	50.9455	5.52573	3.61183	8.32794e-09	Y	Y	65.9822	37.2005	49.6537	85.933	45.6441	34.6164	2.21727	6.24825	8.11168
ENSG00000133640	ENSG00000133640	leucine rich repeats and IQ motif containing 1 [Source:HGNC Symbol;Acc:HGNC:25708]	LRRIQ1	40.326	4.23062	3.82437	8.5895e-10	77.5503	4.23062	6.72372	1.79769e-16	Y	Y	79.6337	76.3589	76.6583	54.388	31.038	35.552	2.21727	4.1655	6.30908
ENSG00000158125	ENSG00000158125	xanthine dehydrogenase [Source:HGNC Symbol;Acc:HGNC:12805]	XDH	163.68	34.0547	3.82266	3.23934e-17	86.1114	34.0547	2.14961	3.92051e-06	Y	Y	104.661	74.401	79.2717	203.411	134.194	153.435	25.4986	40.6136	36.0519
ENSG00000025039	ENSG00000025039	Ras related GTP binding D [Source:HGNC Symbol;Acc:HGNC:19903]	RRAGD	42.0834	5.36167	3.78854	2.96671e-09	32.5384	5.36167	3.04762	4.612e-07	Y	Y	37.5416	31.3267	28.7469	34.8083	47.4699	43.9722	6.6518	3.12412	6.30908
ENSG00000186469	ENSG00000186469	G protein subunit gamma 2 [Source:HGNC Symbol;Acc:HGNC:4404]	GNG2	235.661	55.7124	3.78508	2.22304e-37	643.225	55.7124	10.0629	9.88149e-116	Y	Y	597.253	668.63	663.791	240.395	236.436	230.152	50.9972	59.3583	56.7818
ENSG00000163449	ENSG00000163449	transmembrane protein 169 [Source:HGNC Symbol;Acc:HGNC:25130]	TMEM169	88.287	17.8225	3.74856	2.54972e-16	127.712	17.8225	5.25985	5.13964e-25	Y	Y	134.24	124.328	124.57	77.2309	92.2011	95.429	17.7381	17.7034	18.026
ENSG00000006468	ENSG00000006468	ETS variant 1 [Source:HGNC Symbol;Acc:HGNC:3490]	ETV1	424.805	105.265	3.74836	1.17295e-39	315.045	105.265	2.81398	4.1831e-24	Y	Y	277.58	350.468	317.087	390.506	460.093	423.817	118.624	98.9306	98.2414
ENSG00000132185	ENSG00000132185	Fc receptor like A [Source:HGNC Symbol;Acc:HGNC:18504]	FCRLA	36.1809	3.72128	3.67857	2.96645e-08	33.217	3.72128	3.44005	1.17481e-07	Y	Y	31.8535	38.1795	29.618	41.3349	43.8183	23.3895	4.43454	3.12412	3.60519
ENSG00000143416	ENSG00000143416	selenium binding protein 1 [Source:HGNC Symbol;Acc:HGNC:10719]	SELENBP1	30.7262	2.58838	3.67725	4.4223e-08	49.8048	2.58838	5.49939	1.57058e-11	Y	Y	52.3307	43.0743	54.0093	34.8083	25.5607	31.8097	2.21727	1.04137	4.50649
ENSG00000100027	ENSG00000100027	yippee like 1 [Source:HGNC Symbol;Acc:HGNC:12845]	YPEL1	178.664	32.5768	3.67491	1.04719e-11	117.451	32.5768	2.61233	7.03879e-07	Y	Y	136.515	85.1696	130.668	269.764	167.057	99.1713	24.3899	42.6963	30.6441
ENSG00000197134	ENSG00000197134	zinc finger protein 257 [Source:HGNC Symbol;Acc:HGNC:13498]	ZNF257	165.324	36.8277	3.67056	6.29802e-21	342.277	36.8277	7.26472	8.346e-48	Y	Y	361.765	335.784	329.282	203.411	161.58	130.981	26.6072	40.6136	43.2623
ENSG00000143473	ENSG00000143473	potassium voltage-gated channel subfamily H member 1 [Source:HGNC Symbol;Acc:HGNC:6250]	KCNH1	437.584	110.581	3.65224	1.26041e-33	301.1	110.581	2.55994	1.12272e-17	Y	Y	288.957	318.162	296.18	462.298	450.964	399.492	138.579	109.344	83.8207
ENSG00000110090	ENSG00000110090	carnitine palmitoyltransferase 1A [Source:HGNC Symbol;Acc:HGNC:2328]	CPT1A	1563.51	392.64	3.62624	1.00009e-30	1718.68	392.64	3.96168	5.84166e-35	Y	Y	2081.85	1723.95	1350.23	1736.06	1471.57	1482.89	471.169	403.012	303.737
ENSG00000115468	ENSG00000115468	EF-hand domain family member D1 [Source:HGNC Symbol;Acc:HGNC:29556]	EFHD1	264.786	66.5326	3.58391	2.31047e-30	339.955	66.5326	4.54827	6.96759e-43	Y	Y	328.773	334.805	356.287	234.956	303.99	255.413	56.5403	71.8548	71.2025
ENSG00000159217	ENSG00000159217	insulin like growth factor 2 mRNA binding protein 1 [Source:HGNC Symbol;Acc:HGNC:28866]	IGF2BP1	38.3662	4.8075	3.56656	1.11586e-09	123.879	4.8075	9.99205	7.31993e-24	Y	Y	150.166	112.58	108.89	46.7737	36.5153	31.8097	6.6518	4.1655	3.60519
ENSG00000188859	ENSG00000188859	family with sequence similarity 78 member B [Source:HGNC Symbol;Acc:HGNC:13495]	FAM78B	69.5334	12.4605	3.54762	3.16616e-10	45.6735	12.4605	2.50297	5.92929e-06	Y	Y	35.2664	53.8428	47.9114	52.2125	69.379	87.0088	7.76044	12.4965	17.1247
ENSG00000147642	ENSG00000147642	syntabulin [Source:HGNC Symbol;Acc:HGNC:26011]	SYBU	57.7102	9.75478	3.54303	4.09308e-11	120.766	9.75478	6.79912	1.2556e-22	Y	Y	145.616	108.665	108.019	76.1432	50.2085	46.7789	9.9777	9.37237	9.91427
ENSG00000142661	ENSG00000142661	myomesin 3 [Source:HGNC Symbol;Acc:HGNC:26679]	MYOM3	548.799	147.301	3.50353	7.66487e-42	693.523	147.301	4.39706	9.46655e-59	Y	Y	609.767	786.106	684.698	561.284	533.123	551.991	155.209	161.413	125.28
ENSG00000180287	ENSG00000180287	phospholipase D family member 5 [Source:HGNC Symbol;Acc:HGNC:26879]	PLD5	456.554	120.45	3.50086	1.29194e-37	879.645	120.45	6.58416	2.44009e-86	Y	Y	1001.11	799.811	838.015	479.702	480.176	409.783	123.058	103.096	135.195
ENSG00000132561	ENSG00000132561	matrilin 2 [Source:HGNC Symbol;Acc:HGNC:6908]	MATN2	8378.41	2270.9	3.49955	7.49988e-47	11360.1	2270.9	4.69013	3.00137e-71	Y	Y	11701.6	11281.5	11097.2	9787.66	8716.2	6631.38	2279.35	2518.04	2015.3
ENSG00000046889	ENSG00000046889	phosphatidylinositol-3,4,5-trisphosphate dependent Rac exchange factor 2 [Source:HGNC Symbol;Acc:HGNC:22950]	PREX2	1913.04	527.188	3.49244	2.60288e-62	1894.89	527.188	3.46015	2.25392e-61	Y	Y	1953.3	1980.44	1750.95	2091.76	1975.48	1671.88	559.86	546.722	474.984
ENSG00000170873	ENSG00000170873	MTSS1, I-BAR domain containing [Source:HGNC Symbol;Acc:HGNC:20443]	MTSS1	10771.1	2929.22	3.48045	3.00782e-44	9483.98	2929.22	3.08063	4.55094e-36	Y	Y	9999.72	8977.07	9475.14	13165.2	10511.8	8636.32	3241.65	2836.7	2709.3
ENSG00000228262	ENSG00000228262	long intergenic non-protein coding RNA 1320 [Source:HGNC Symbol;Acc:HGNC:50526]	LINC01320	32.4353	2.9355	3.47548	1.26656e-07	42.0692	2.9355	4.24212	2.87313e-09	Y	Y	31.8535	49.927	44.427	19.5797	34.6895	43.0366	2.21727	2.08275	4.50649
ENSG00000083454	ENSG00000083454	purinergic receptor P2X 5 [Source:HGNC Symbol;Acc:HGNC:8536]	P2RX5	225.199	57.6507	3.46879	8.78042e-23	227.793	57.6507	3.49944	4.85212e-23	Y	Y	261.654	206.561	215.166	228.43	227.308	219.861	70.9526	61.4411	40.5584
ENSG00000113532	ENSG00000113532	ST8 alpha-N-acetyl-neuraminide alpha-2,8-sialyltransferase 4 [Source:HGNC Symbol;Acc:HGNC:10871]	ST8SIA4	23.6624	0.994682	3.46495	7.37831e-06	24.7897	0.994682	3.58787	5.29126e-06	Y	Y	28.4406	21.5371	24.3913	30.4573	25.5607	14.9693	0	2.08275	0.901298
ENSG00000099338	ENSG00000099338	cation channel sperm associated auxiliary subunit gamma [Source:HGNC Symbol;Acc:HGNC:25243]	CATSPERG	50.4229	8.62188	3.46377	2.29162e-09	41.6519	8.62188	2.97204	1.55733e-07	Y	Y	32.9911	44.0532	47.9114	59.8268	47.4699	43.9722	7.76044	7.28962	10.8156
ENSG00000139679	ENSG00000139679	lysophosphatidic acid receptor 6 [Source:HGNC Symbol;Acc:HGNC:15520]	LPAR6	23.9591	1.43334	3.45614	4.73583e-06	16.3326	1.43334	2.62079	0.000123978	Y	Y	18.202	18.6003	12.1956	23.9307	28.2993	19.6471	2.21727	2.08275	0
ENSG00000153012	ENSG00000153012	leucine rich repeat LGI family member 2 [Source:HGNC Symbol;Acc:HGNC:18710]	LGI2	31.3478	2.0342	3.43086	1.4606e-06	15.1521	2.0342	2.1278	0.00091396	Y	Y	19.3396	15.6634	10.4534	48.9492	30.1251	14.9693	2.21727	2.08275	1.8026
ENSG00000260877	ENSG00000260877	novel transcript		85.0207	18.6307	3.41495	1.3949e-11	51.0361	18.6307	2.18985	2.72644e-05	Y	Y	54.606	40.1374	58.3649	71.7921	79.4207	103.849	21.064	17.7034	17.1247
ENSG00000163362	ENSG00000163362	innate immunity activator [Source:HGNC Symbol;Acc:HGNC:25599]	INAVA	804.529	227.383	3.35498	3.87009e-42	509.322	227.383	2.15857	5.39995e-17	Y	Y	477.802	581.503	468.661	796.24	725.741	891.606	210.64	248.888	222.621
ENSG00000160284	ENSG00000160284	spermatogenesis and centriole associated 1 like [Source:HGNC Symbol;Acc:HGNC:1298]	SPATC1L	104.127	25.1532	3.34408	8.62198e-14	80.5439	25.1532	2.64348	3.31417e-09	Y	Y	93.2852	65.5904	82.7561	98.9861	109.546	103.849	24.3899	31.2412	19.8285
ENSG00000169071	ENSG00000169071	receptor tyrosine kinase like orphan receptor 2 [Source:HGNC Symbol;Acc:HGNC:10257]	ROR2	56.0948	10.0813	3.34405	2.15181e-09	69.3249	10.0813	3.99927	8.07071e-12	Y	Y	85.3218	61.6745	60.9782	73.9677	44.7312	49.5856	6.6518	14.5792	9.01298
ENSG00000240225	ENSG00000240225	zinc finger protein 542, pseudogene [Source:HGNC Symbol;Acc:HGNC:25393]	ZNF542P	61.8297	7.99645	3.33436	4.39156e-08	62.9769	7.99645	3.37192	3.43945e-08	Y	Y	62.5693	55.8008	70.5605	31.545	54.7729	99.1713	5.54317	3.12412	15.3221
ENSG00000128536	ENSG00000128536	cadherin related family member 3 [Source:HGNC Symbol;Acc:HGNC:26308]	CDHR3	74.1207	16.4356	3.32926	7.58818e-12	71.1408	16.4356	3.20678	3.66452e-11	Y	Y	72.808	66.5693	74.045	71.7921	77.595	72.9751	12.195	14.5792	22.5324
ENSG00000002079	ENSG00000002079	myosin heavy chain 16 pseudogene [Source:HGNC Symbol;Acc:HGNC:31038]	MYH16	136.516	32.7611	3.32372	6.13473e-14	124.531	32.7611	3.07366	2.9995e-12	Y	Y	92.1476	135.097	146.348	141.409	127.803	140.337	19.9554	39.5722	38.7558
ENSG00000162746	ENSG00000162746	Fc receptor like B [Source:HGNC Symbol;Acc:HGNC:26431]	FCRLB	153.077	37.9332	3.29528	2.77537e-14	133.437	37.9332	2.91685	1.22163e-11	Y	Y	153.579	112.58	134.152	203.411	134.194	121.625	41.0195	38.5308	34.2493
ENSG00000233639	ENSG00000233639	POU3F3 adjacent non-coding transcript 1 [Source:HGNC Symbol;Acc:HGNC:49513]	PANTR1	112.246	26.8566	3.29507	1.52161e-13	113.827	26.8566	3.35045	7.48115e-14	Y	Y	104.661	117.475	119.343	137.058	96.7655	102.914	27.7158	17.7034	35.1506
ENSG00000172159	ENSG00000172159	FERM domain containing 3 [Source:HGNC Symbol;Acc:HGNC:24125]	FRMD3	213.378	57.9561	3.27975	1.85525e-23	405.099	57.9561	6.04824	4.8605e-54	Y	Y	424.334	418.995	371.967	251.272	201.747	187.116	57.649	66.648	49.5714
ENSG00000118242	ENSG00000118242	melanoregulin [Source:HGNC Symbol;Acc:HGNC:25478]	MREG	266.879	75.0785	3.27349	1.59938e-26	163.581	75.0785	2.04692	8.69454e-10	Y	Y	174.057	170.339	146.348	240.395	270.213	290.029	78.713	70.8135	75.709
ENSG00000162777	ENSG00000162777	DENN domain containing 2D [Source:HGNC Symbol;Acc:HGNC:26192]	DENND2D	54.6065	10.6843	3.2678	3.78792e-10	128.442	10.6843	6.9407	1.03698e-23	Y	Y	121.726	123.349	140.25	50.0369	52.0343	61.7482	7.76044	19.7861	4.50649
ENSG00000140538	ENSG00000140538	neurotrophic receptor tyrosine kinase 3 [Source:HGNC Symbol;Acc:HGNC:8033]	NTRK3	975.717	265.452	3.26609	1.57074e-20	888.693	265.452	2.99823	1.02982e-17	Y	Y	695.088	937.844	1033.14	839.75	935.704	1151.7	195.12	255.137	346.098
ENSG00000271856	ENSG00000271856	long intergenic non-protein coding RNA 1215 [Source:HGNC Symbol;Acc:HGNC:49651]	LINC01215	57.7103	10.2868	3.26335	2.72888e-09	115.397	10.2868	5.85358	3.59219e-18	Y	Y	147.891	92.0223	106.276	82.6697	49.2956	41.1654	12.195	11.4551	7.21038
ENSG00000150627	ENSG00000150627	WD repeat domain 17 [Source:HGNC Symbol;Acc:HGNC:16661]	WDR17	258.259	73.1113	3.25059	2.80198e-28	250.517	73.1113	3.15052	1.10117e-26	Y	Y	262.791	245.719	243.042	244.746	281.168	248.864	76.4957	63.5238	79.3142
ENSG00000235750	ENSG00000235750	KIAA0040 [Source:HGNC Symbol;Acc:HGNC:28950]	KIAA0040	113.671	29.2678	3.24538	9.68331e-15	70.4013	29.2678	2.0951	3.18814e-06	Y	Y	69.3951	69.5062	72.3027	109.864	110.459	120.69	22.1727	32.2826	33.348
ENSG00000196074	ENSG00000196074	synaptonemal complex protein 2 [Source:HGNC Symbol;Acc:HGNC:11490]	SYCP2	62.3176	13.7522	3.2441	2.85389e-10	56.3142	13.7522	2.96573	6.40688e-09	Y	Y	51.1931	64.6114	53.1381	57.6513	67.5533	61.7482	15.5209	10.4137	15.3221
ENSG00000169432	ENSG00000169432	sodium voltage-gated channel alpha subunit 9 [Source:HGNC Symbol;Acc:HGNC:10597]	SCN9A	616.581	178.948	3.23839	2.77548e-35	600.368	178.948	3.15638	1.13489e-33	Y	Y	557.436	574.65	669.018	523.212	644.495	682.036	159.643	184.323	192.878
ENSG00000067715	ENSG00000067715	synaptotagmin 1 [Source:HGNC Symbol;Acc:HGNC:11509]	SYT1	40.8257	4.82992	3.23664	5.18266e-08	94.893	4.82992	6.28324	2.44241e-15	Y	Y	127.414	75.38	81.885	65.2656	31.9509	25.2606	7.76044	3.12412	3.60519
ENSG00000165511	ENSG00000165511	chromosome 10 open reading frame 25 [Source:HGNC Symbol;Acc:HGNC:23509]	C10orf25	16.8339	0	3.23138	2.27791e-06	16.3855	0	3.15224	2.94324e-06	Y	Y	19.3396	17.6213	12.1956	16.3164	17.3448	16.8404	0	0	0
ENSG00000136098	ENSG00000136098	NIMA related kinase 3 [Source:HGNC Symbol;Acc:HGNC:7746]	NEK3	254.551	70.8706	3.22635	4.2365e-21	201.399	70.8706	2.59474	4.70465e-14	Y	Y	192.259	196.771	215.166	279.554	284.819	199.278	80.9303	67.6893	63.9921
ENSG00000124496	ENSG00000124496	transcriptional regulating factor 1 [Source:HGNC Symbol;Acc:HGNC:18273]	TRERF1	332.311	96.6508	3.21929	3.76615e-34	511.508	96.6508	4.89864	4.22658e-64	Y	Y	482.353	536.471	515.701	362.224	323.16	311.548	101.994	104.137	83.8207
ENSG00000167244	ENSG00000167244	insulin like growth factor 2 [Source:HGNC Symbol;Acc:HGNC:5466]	IGF2	21.4256	0.647557	3.21628	4.79309e-05	28.1715	0.647557	3.91009	9.23804e-06	Y	Y	36.404	17.6213	30.4891	27.194	13.6932	23.3895	0	1.04137	0.901298
ENSG00000142677	ENSG00000142677	interleukin 22 receptor subunit alpha 1 [Source:HGNC Symbol;Acc:HGNC:13700]	IL22RA1	54.2137	10.3071	3.20704	3.22069e-08	39.443	10.3071	2.46456	1.93487e-05	Y	Y	53.4683	35.2426	29.618	62.0023	53.86	46.7789	12.195	5.20687	13.5195
ENSG00000224376	ENSG00000224376	novel transcript		67.2311	14.1236	3.20665	7.2241e-09	40.9215	14.1236	2.13264	0.000230364	Y	Y	50.0555	27.4109	45.2981	87.0208	53.86	60.8126	14.4122	13.5379	14.4208
ENSG00000138061	ENSG00000138061	cytochrome P450 family 1 subfamily B member 1 [Source:HGNC Symbol;Acc:HGNC:2597]	CYP1B1	2236.97	677.477	3.20527	2.54844e-67	2639.25	677.477	3.77017	1.24252e-87	Y	Y	2308.24	2889.89	2719.63	2202.71	2197.31	2310.88	665.18	649.818	717.433
ENSG00000154065	ENSG00000154065	ankyrin repeat domain 29 [Source:HGNC Symbol;Acc:HGNC:27110]	ANKRD29	464.834	135.751	3.19301	1.43238e-30	603.358	135.751	4.10665	2.34735e-45	Y	Y	606.354	559.966	643.756	542.792	438.183	413.526	160.752	123.924	122.576
ENSG00000171346	ENSG00000171346	keratin 15 [Source:HGNC Symbol;Acc:HGNC:6421]	KRT15	534.247	149.272	3.19033	1.171e-19	382.258	149.272	2.34228	7.57579e-11	Y	Y	447.086	341.657	358.029	692.903	508.475	401.363	158.535	127.048	162.234
ENSG00000226835	ENSG00000226835	uncharacterized LOC107985092 [Source:NCBI gene;Acc:107985092]		87.5114	21.7975	3.17547	1.81648e-12	90.0978	21.7975	3.2722	4.78953e-13	Y	Y	81.909	96.9171	91.4673	100.074	88.5496	73.9107	22.1727	19.7861	23.4337
ENSG00000269707	ENSG00000269707	novel transcript, sense overlapping POU3F3		47.5426	9.40766	3.17229	1.27588e-08	54.3535	9.40766	3.53996	5.23586e-10	Y	Y	51.1931	66.5693	45.2981	39.1593	52.9472	50.5212	9.9777	8.33099	9.91427
ENSG00000138395	ENSG00000138395	cyclin dependent kinase 15 [Source:HGNC Symbol;Acc:HGNC:14434]	CDK15	2344.06	725.477	3.1599	5.15063e-85	1995.66	725.477	2.69885	6.50823e-63	Y	Y	1945.34	1855.13	2186.5	2419.18	2308.68	2304.33	709.526	720.631	746.274
ENSG00000100151	ENSG00000100151	protein interacting with PRKCA 1 [Source:HGNC Symbol;Acc:HGNC:9394]	PICK1	49.7583	9.38894	3.15891	7.82352e-08	35.915	9.38894	2.43891	3.17109e-05	Y	Y	37.5416	28.3899	41.8136	57.6513	40.1668	51.4568	4.43454	15.6206	8.11168
ENSG00000175785	ENSG00000175785	proline rich membrane anchor 1 [Source:HGNC Symbol;Acc:HGNC:18319]	PRIMA1	25.2596	1.45576	3.12305	9.68078e-06	18.1139	1.45576	2.50392	0.000136536	Y	Y	28.4406	13.7055	12.1956	36.9838	20.0834	18.7116	3.3259	1.04137	0
ENSG00000106258	ENSG00000106258	cytochrome P450 family 3 subfamily A member 5 [Source:HGNC Symbol;Acc:HGNC:2638]	CYP3A5	33.5307	4.74209	3.11038	6.46735e-07	36.4688	4.74209	3.32463	1.74967e-07	Y	Y	30.7159	34.2636	44.427	29.3695	32.8638	38.3587	1.10863	10.4137	2.70389
ENSG00000168243	ENSG00000168243	G protein subunit gamma 4 [Source:HGNC Symbol;Acc:HGNC:4407]	GNG4	3162.93	993.575	3.08871	5.21496e-58	5846.87	993.575	5.62668	4.44177e-137	Y	Y	6375.25	5767.06	5398.31	3269.81	3341.15	2877.84	1039.9	1061.16	879.666
ENSG00000166689	ENSG00000166689	pleckstrin homology domain containing A7 [Source:HGNC Symbol;Acc:HGNC:27049]	PLEKHA7	349.253	105.978	3.07275	7.09347e-31	642.228	105.978	5.54352	3.25262e-73	Y	Y	666.648	644.156	615.88	397.032	318.596	332.13	117.515	89.5582	110.86
ENSG00000179869	ENSG00000179869	ATP binding cassette subfamily A member 13 [Source:HGNC Symbol;Acc:HGNC:14638]	ABCA13	190.913	55.0179	3.07013	1.02654e-17	135.912	55.0179	2.24532	2.04302e-09	Y	Y	124.001	132.16	151.574	216.464	195.357	160.919	47.6713	55.1928	62.1895
ENSG00000198910	ENSG00000198910	L1 cell adhesion molecule [Source:HGNC Symbol;Acc:HGNC:6470]	L1CAM	1489.36	448.906	3.06098	5.70171e-26	20157.8	448.906	36.0304	2.26668e-262	Y	Y	22579.6	18878.3	19015.6	1691.47	1587.5	1189.12	416.846	567.549	362.322
ENSG00000170579	ENSG00000170579	DLG associated protein 1 [Source:HGNC Symbol;Acc:HGNC:2905]	DLGAP1	36.8629	6.33393	3.05188	7.00065e-07	29.781	6.33393	2.59479	1.99839e-05	Y	Y	27.303	25.453	36.5869	42.4226	42.9055	25.2606	5.54317	6.24825	7.21038
ENSG00000181690	ENSG00000181690	PLAG1 zinc finger [Source:HGNC Symbol;Acc:HGNC:9045]	PLAG1	162.434	47.0908	3.05069	9.91508e-18	198.059	47.0908	3.67885	4.98873e-24	Y	Y	204.772	189.918	199.486	177.305	175.273	134.723	46.5626	54.1515	40.5584
ENSG00000115232	ENSG00000115232	integrin subunit alpha 4 [Source:HGNC Symbol;Acc:HGNC:6140]	ITGA4	27.0927	2.84397	3.04527	1.82375e-08	638.829	2.84397	56.2066	8.85858e-51	Y	Y	673.474	576.608	666.405	17.4042	27.3865	36.4875	0	3.12412	5.40779
ENSG00000246263	ENSG00000246263	UBR5 antisense RNA 1 [Source:HGNC Symbol;Acc:HGNC:51661]	UBR5-AS1	94.0454	25.2202	3.03635	1.76577e-11	62.8621	25.2202	2.12259	1.06648e-05	Y	Y	67.1198	50.906	70.5605	106.6	89.4624	86.0732	24.3899	26.0344	25.2363
ENSG00000140873	ENSG00000140873	ADAM metallopeptidase with thrombospondin type 1 motif 18 [Source:HGNC Symbol;Acc:HGNC:17110]	ADAMTS18	95.0904	16.8244	3.03414	4.49508e-07	63.9533	16.8244	2.27617	0.000186921	Y	Y	100.111	42.0953	49.6537	154.462	82.1594	48.6501	25.4986	11.4551	13.5195
ENSG00000142327	ENSG00000142327	arginyl aminopeptidase like 1 [Source:HGNC Symbol;Acc:HGNC:10079]	RNPEPL1	5499.96	1755.13	3.02555	4.63676e-47	3645.37	1755.13	2.0303	1.75584e-19	Y	Y	3673.39	3576.14	3686.57	6481.96	5202.51	4815.42	1718.38	1932.79	1614.22
ENSG00000254887	ENSG00000254887	uncharacterized LOC100505622 [Source:NCBI gene;Acc:100505622]		24.6993	3.07373	3.02465	7.7682e-06	16.556	3.07373	2.26738	0.00056081	Y	Y	15.9267	13.7055	20.0357	19.5797	27.3865	27.1318	4.43454	2.08275	2.70389
ENSG00000175832	ENSG00000175832	ETS variant 4 [Source:HGNC Symbol;Acc:HGNC:3493]	ETV4	716.677	228.734	3.02034	1.22258e-47	495.229	228.734	2.10673	2.64258e-21	Y	Y	468.701	549.197	467.79	736.413	716.612	697.006	220.618	224.937	240.646
ENSG00000176485	ENSG00000176485	phospholipase A2 group XVI [Source:HGNC Symbol;Acc:HGNC:17825]	PLA2G16	906.945	267.736	3.0184	7.54921e-17	796.686	267.736	2.68213	1.48539e-13	Y	Y	850.943	749.884	789.232	1151.94	868.151	700.748	322.612	303.04	177.556
ENSG00000100292	ENSG00000100292	heme oxygenase 1 [Source:HGNC Symbol;Acc:HGNC:5013]	HMOX1	10063	2600.92	3.0116	5.8146e-10	7255.81	2600.92	2.29634	4.7126e-06	Y	Y	8775.63	6578.62	6413.16	13767.8	9556.96	6864.34	3028.79	2719.03	2054.96
ENSG00000148219	ENSG00000148219	astrotactin 2 [Source:HGNC Symbol;Acc:HGNC:17021]	ASTN2	31.624	5.03882	2.99381	9.47025e-07	40.7169	5.03882	3.68544	1.08777e-08	Y	Y	40.9545	33.2847	47.9114	41.3349	29.2122	24.325	5.54317	4.1655	5.40779
ENSG00000180861	ENSG00000180861	long intergenic non-protein coding RNA 1559 [Source:HGNC Symbol;Acc:HGNC:26598]	LINC01559	130.007	37.0242	2.98129	1.72971e-13	143.8	37.0242	3.27181	1.05285e-15	Y	Y	137.653	136.076	157.672	120.741	119.588	149.693	46.5626	23.9516	40.5584
ENSG00000278384	ENSG00000278384			15.5508	0.369545	2.98036	0.000106458	16.2248	0.369545	3.05682	9.1908e-05	Y	Y	18.202	15.6634	14.809	15.2286	15.519	15.9048	1.10863	0	0
ENSG00000198838	ENSG00000198838	ryanodine receptor 3 [Source:HGNC Symbol;Acc:HGNC:10485]	RYR3	42.6943	8.97085	2.9741	1.7829e-07	42.598	8.97085	2.95904	2.11355e-07	Y	Y	43.2297	40.1374	44.427	33.7205	42.9055	51.4568	5.54317	11.4551	9.91427
ENSG00000100060	ENSG00000100060	MFNG O-fucosylpeptide 3-beta-N-acetylglucosaminyltransferase [Source:HGNC Symbol;Acc:HGNC:7038]	MFNG	396.012	117.089	2.95482	9.80064e-15	334.868	117.089	2.53823	4.67927e-11	Y	Y	298.058	340.678	365.869	350.259	358.763	479.016	111.972	77.0617	162.234
ENSG00000120885	ENSG00000120885	clusterin [Source:HGNC Symbol;Acc:HGNC:2095]	CLU	2657.69	875.867	2.95107	5.62134e-57	2836.87	875.867	3.14639	5.68681e-64	Y	Y	2516.42	3021.07	2973.12	2549.71	2679.31	2744.05	782.695	930.989	913.916
ENSG00000235142	ENSG00000235142	long intergenic non-protein coding RNA 2532 [Source:HGNC Symbol;Acc:HGNC:53549]	LINC02532	83.0308	22.4472	2.94956	5.48588e-10	60.1174	22.4472	2.21962	8.1449e-06	Y	Y	53.4683	76.3589	50.5248	83.7575	85.8109	79.5241	23.2813	26.0344	18.026
ENSG00000213694	ENSG00000213694	sphingosine-1-phosphate receptor 3 [Source:HGNC Symbol;Acc:HGNC:3167]	S1PR3	2803.62	913.783	2.93664	1.71631e-35	2383.58	913.783	2.51155	5.35753e-26	Y	Y	2616.54	2404.33	2129.88	3281.77	2699.39	2429.7	1013.29	913.285	814.773
ENSG00000189195	ENSG00000189195	BTB domain containing 8 [Source:HGNC Symbol;Acc:HGNC:21019]	BTBD8	151.125	44.8237	2.9331	1.60771e-15	360.706	44.8237	6.63188	4.75636e-47	Y	Y	389.068	336.763	356.287	172.954	160.667	119.754	50.9972	51.0273	32.4467
ENSG00000167646	ENSG00000167646	dynein axonemal assembly factor 3 [Source:HGNC Symbol;Acc:HGNC:30492]	DNAAF3	116.713	30.2578	2.92837	2.65934e-09	132.238	30.2578	3.26089	5.16169e-11	Y	Y	166.093	108.665	121.956	165.339	93.114	91.6867	38.8022	31.2412	20.7298
ENSG00000116106	ENSG00000116106	EPH receptor A4 [Source:HGNC Symbol;Acc:HGNC:3388]	EPHA4	207.247	64.9582	2.92181	3.67253e-19	157.431	64.9582	2.25595	3.91301e-11	Y	Y	137.653	183.066	151.574	202.323	214.527	204.892	66.518	69.7721	58.5843
ENSG00000173801	ENSG00000173801	junction plakoglobin [Source:HGNC Symbol;Acc:HGNC:6207]	JUP	110.316	30.6344	2.90234	4.2296e-10	88.782	30.6344	2.39187	4.86509e-07	Y	Y	111.487	85.1696	69.6894	129.443	98.5913	102.914	27.7158	41.655	22.5324
ENSG00000196296	ENSG00000196296	ATPase sarcoplasmic/endoplasmic reticulum Ca2+ transporting 1 [Source:HGNC Symbol;Acc:HGNC:811]	ATP2A1	92.2628	25.5428	2.90094	1.17524e-10	87.6798	25.5428	2.78211	7.17767e-10	Y	Y	87.5971	82.2327	93.2095	114.215	83.9851	78.5886	22.1727	22.9102	31.5454
ENSG00000101670	ENSG00000101670	lipase G, endothelial type [Source:HGNC Symbol;Acc:HGNC:6623]	LIPG	9172.59	2963.85	2.89653	3.78886e-24	12079	2963.85	3.75654	4.90301e-37	Y	Y	9636.82	12239.9	14360.4	7955.87	9261.19	10300.7	2526.58	2760.68	3604.29
ENSG00000230882	ENSG00000230882	hypothetical protein LOC285908 (LOC285908) pseudogene		158.239	48.895	2.88689	1.52938e-16	153.303	48.895	2.80103	1.43953e-15	Y	Y	158.13	161.529	140.25	168.603	143.322	162.791	41.0195	55.1928	50.4727
ENSG00000115425	ENSG00000115425	peroxisomal trans-2-enoyl-CoA reductase [Source:HGNC Symbol;Acc:HGNC:18281]	PECR	683.752	230.693	2.85456	3.46438e-37	513.087	230.693	2.1583	7.21156e-20	Y	Y	556.298	493.396	489.568	725.536	714.787	610.933	250.551	227.02	214.509
ENSG00000115365	ENSG00000115365	LanC like 1 [Source:HGNC Symbol;Acc:HGNC:6508]	LANCL1	5812.85	1994.5	2.85364	2.02076e-65	4365.14	1994.5	2.15444	5.30284e-35	Y	Y	4591.45	4160.58	4343.39	6244.83	6002.2	5191.52	2089.77	1870.31	2023.41
ENSG00000144369	ENSG00000144369	family with sequence similarity 171 member B [Source:HGNC Symbol;Acc:HGNC:29412]	FAM171B	455.06	150.688	2.85352	1.12697e-27	341.835	150.688	2.16371	5.61022e-15	Y	Y	353.801	340.678	331.025	405.734	507.562	451.884	143.014	133.296	175.753
ENSG00000172927	ENSG00000172927	myeloma overexpressed [Source:HGNC Symbol;Acc:HGNC:7563]	MYEOV	852.57	286.015	2.84844	7.44686e-32	609.597	286.015	2.06374	2.49788e-15	Y	Y	524.445	651.009	653.338	795.152	830.723	931.836	311.526	243.682	302.836
ENSG00000196277	ENSG00000196277	glutamate metabotropic receptor 7 [Source:HGNC Symbol;Acc:HGNC:4599]	GRM7	13.6516	0	2.84335	7.03782e-06	21.3719	0	3.88639	4.81632e-07	Y	Y	20.4772	24.474	19.1646	14.1409	12.7803	14.0337	0	0	0
ENSG00000166670	ENSG00000166670	matrix metallopeptidase 10 [Source:HGNC Symbol;Acc:HGNC:7156]	MMP10	29.5296	3.88563	2.84167	1.30798e-05	20.6115	3.88563	2.23508	0.000531442	Y	Y	20.4772	19.5792	21.7779	42.4226	24.6478	21.5183	3.3259	8.33099	0
ENSG00000100024	ENSG00000100024	beta-ureidopropionase 1 [Source:HGNC Symbol;Acc:HGNC:16297]	UPB1	97.7322	24.6885	2.83983	7.88621e-08	86.5494	24.6885	2.57915	1.28268e-06	Y	Y	89.8723	86.1486	83.6272	156.637	76.6821	59.877	25.4986	26.0344	22.5324
ENSG00000171811	ENSG00000171811	cilia and flagella associated protein 46 [Source:HGNC Symbol;Acc:HGNC:25247]	CFAP46	22.1763	2.17243	2.83968	1.92413e-05	23.3257	2.17243	2.92261	1.32589e-05	Y	Y	25.0277	20.5582	24.3913	11.9654	25.5607	29.0029	4.43454	2.08275	0
ENSG00000151789	ENSG00000151789	zinc finger protein 385D [Source:HGNC Symbol;Acc:HGNC:26191]	ZNF385D	134.153	40.4045	2.83687	3.93992e-12	166.252	40.4045	3.4485	8.95735e-17	Y	Y	200.222	139.991	158.543	156.637	122.326	123.496	50.9972	39.5722	30.6441
ENSG00000127863	ENSG00000127863	TNF receptor superfamily member 19 [Source:HGNC Symbol;Acc:HGNC:11915]	TNFRSF19	984.913	338.649	2.83074	5.69689e-52	706.703	338.649	2.04792	2.65576e-24	Y	Y	660.96	688.209	770.939	984.422	941.181	1029.14	334.807	333.24	347.901
ENSG00000114757	ENSG00000114757	peroxisomal biogenesis factor 5 like [Source:HGNC Symbol;Acc:HGNC:30024]	PEX5L	325.627	102.309	2.81614	1.21889e-13	252.533	102.309	2.23322	1.79695e-08	Y	Y	307.159	237.887	212.553	423.138	305.815	247.928	116.407	103.096	87.4259
ENSG00000125746	ENSG00000125746	echinoderm microtubule associated protein like 2 [Source:HGNC Symbol;Acc:HGNC:18035]	EML2	2318.71	790.302	2.81129	1.67624e-32	1764.77	790.302	2.16185	3.14073e-18	Y	Y	1916.9	1645.63	1731.78	2816.21	2182.7	1957.23	808.194	816.437	746.274
ENSG00000155893	ENSG00000155893	2-phosphoxylose phosphatase 1 [Source:HGNC Symbol;Acc:HGNC:26303]	PXYLP1	247.637	81.0009	2.80958	3.59636e-21	310.254	81.0009	3.48458	6.559e-31	Y	Y	329.911	306.415	294.438	265.413	249.217	228.281	66.518	79.1444	97.3401
ENSG00000065320	ENSG00000065320	netrin 1 [Source:HGNC Symbol;Acc:HGNC:8029]	NTN1	1860.76	631.093	2.80405	4.33583e-28	1464.01	631.093	2.22952	3.92909e-17	Y	Y	1510.77	1396	1485.25	2138.54	1924.36	1519.38	545.448	746.665	601.166
ENSG00000152056	ENSG00000152056	adaptor related protein complex 1 subunit sigma 3 [Source:HGNC Symbol;Acc:HGNC:18971]	AP1S3	720.272	249.03	2.77638	2.28302e-33	571.79	249.03	2.21785	3.14441e-20	Y	Y	632.519	561.924	520.928	774.485	760.431	625.902	249.443	248.888	248.758
ENSG00000164379	ENSG00000164379	forkhead box Q1 [Source:HGNC Symbol;Acc:HGNC:20951]	FOXQ1	174.226	56.2896	2.7763	1.86912e-15	234.853	56.2896	3.68434	5.80188e-25	Y	Y	240.039	207.54	256.98	202.323	172.535	147.821	58.7576	61.4411	48.6701
ENSG00000227038	ENSG00000227038	general transcription factor IIi pseudogene 7 [Source:HGNC Symbol;Acc:HGNC:51720]	GTF2IP7	33.0212	7.09729	2.77069	3.93849e-06	29.8839	7.09729	2.54706	2.30686e-05	Y	Y	29.5782	31.3267	28.7469	26.1062	38.341	34.6164	6.6518	8.33099	6.30908
ENSG00000213190	ENSG00000213190	MLLT11, transcription factor 7 cofactor [Source:HGNC Symbol;Acc:HGNC:16997]	MLLT11	1398.94	498.021	2.74146	2.8984e-48	1156.64	498.021	2.27359	7.94256e-32	Y	Y	1254.8	1137.55	1077.57	1365.14	1480.69	1350.97	522.167	524.853	447.044
ENSG00000269113	ENSG00000269113	TraB domain containing 2B [Source:HGNC Symbol;Acc:HGNC:44200]	TRABD2B	260.356	88.5896	2.73377	4.38727e-20	223.78	88.5896	2.36464	1.07458e-14	Y	Y	240.039	214.392	216.908	275.203	274.777	231.088	75.3871	102.055	88.3272
ENSG00000269896	ENSG00000269896	small nuclear ribonucleoprotein polypeptide N pseudogene [Source:NCBI gene;Acc:100129534]		87.5869	26.7881	2.72915	3.57951e-10	102.249	26.7881	3.12992	6.9674e-13	Y	Y	119.451	94.9592	92.3384	87.0208	81.2465	94.4934	33.259	21.8689	25.2363
ENSG00000082458	ENSG00000082458	discs large MAGUK scaffold protein 3 [Source:HGNC Symbol;Acc:HGNC:2902]	DLG3	219.08	73.0884	2.7267	2.79538e-15	251.031	73.0884	3.10092	2.76292e-19	Y	Y	260.516	240.824	251.753	252.36	197.183	207.698	94.2339	71.8548	53.1766
ENSG00000233384	ENSG00000233384	novel transcript		133.586	44.01	2.70382	4.85648e-13	156.481	44.01	3.12506	6.49305e-17	Y	Y	169.506	152.718	147.219	129.443	150.626	120.69	54.3231	41.655	36.0519
ENSG00000273812	ENSG00000273812	novel transcript		453.783	154.388	2.69619	1.89788e-15	350.696	154.388	2.12172	3.83096e-09	Y	Y	384.517	334.805	332.767	487.316	481.089	392.943	160.752	197.861	104.551
ENSG00000237517	ENSG00000237517	DiGeorge syndrome critical region gene 5 [Source:HGNC Symbol;Acc:HGNC:16757]	DGCR5	14.4987	0	2.6921	7.27549e-06	24.7586	0	3.85257	2.92698e-07	Y	Y	26.1654	17.6213	30.4891	19.5797	16.4319	7.48463	0	0	0
ENSG00000173890	ENSG00000173890	G protein-coupled receptor 160 [Source:HGNC Symbol;Acc:HGNC:23693]	GPR160	1034.51	371.549	2.68843	2.42546e-35	875.824	371.549	2.28857	1.02931e-24	Y	Y	865.732	801.769	959.971	1080.15	1101.85	921.544	384.696	334.281	395.67
ENSG00000101298	ENSG00000101298	syntaphilin [Source:HGNC Symbol;Acc:HGNC:15931]	SNPH	1063.97	381.393	2.67402	3.59787e-28	954.651	381.393	2.41007	1.59133e-22	Y	Y	941.953	1030.85	891.153	1218.29	995.954	977.679	388.022	435.294	320.862
ENSG00000197360	ENSG00000197360	zinc finger protein 98 [Source:HGNC Symbol;Acc:HGNC:13174]	ZNF98	13.5933	0.347125	2.66001	0.000179778	31.7582	0.347125	4.88993	1.93118e-06	Y	Y	36.404	36.2216	22.649	13.0531	13.6932	14.0337	0	1.04137	0
ENSG00000184307	ENSG00000184307	zinc finger DHHC-type containing 23 [Source:HGNC Symbol;Acc:HGNC:28654]	ZDHHC23	461.056	165.642	2.64581	1.60392e-25	460.648	165.642	2.64573	1.9094e-25	Y	Y	424.334	476.754	480.857	445.981	424.49	512.697	161.861	145.792	189.273
ENSG00000205269	ENSG00000205269	transmembrane protein 170B [Source:HGNC Symbol;Acc:HGNC:34244]	TMEM170B	352.49	125.184	2.64235	7.73889e-21	298.472	125.184	2.25407	1.36515e-14	Y	Y	307.159	271.172	317.087	350.259	379.759	327.452	98.6684	135.379	141.504
ENSG00000227234	ENSG00000227234	SPANX family member B1 [Source:HGNC Symbol;Acc:HGNC:14329]	SPANXB1	32.3112	7.5378	2.64121	9.30806e-07	103.71	7.5378	7.31952	7.7864e-22	Y	Y	112.625	101.812	96.694	30.4573	35.6024	30.8741	6.6518	11.4551	4.50649
ENSG00000130775	ENSG00000130775	thymocyte selection associated family member 2 [Source:HGNC Symbol;Acc:HGNC:16839]	THEMIS2	44.3758	3.85951	2.63048	1.90455e-07	389.472	3.85951	12.2051	2.63653e-25	Y	Y	445.949	319.141	403.327	69.6166	41.9926	21.5183	6.6518	3.12412	1.8026
ENSG00000115414	ENSG00000115414	fibronectin 1 [Source:HGNC Symbol;Acc:HGNC:3778]	FN1	1.0503e+06	392988	2.62481	4.65247e-59	1.17835e+06	392988	2.93867	1.08819e-73	Y	Y	1.19987e+06	1.19885e+06	1.13632e+06	1.11901e+06	1.06502e+06	966864	397874	427165	353923
ENSG00000204977	ENSG00000204977	tripartite motif containing 13 [Source:HGNC Symbol;Acc:HGNC:9976]	TRIM13	287.328	104.106	2.60779	1.00919e-20	265.796	104.106	2.42381	1.29016e-17	Y	Y	243.452	291.73	262.206	298.046	272.039	291.9	119.732	91.6409	100.945
ENSG00000147408	ENSG00000147408	chondroitin sulfate N-acetylgalactosaminyltransferase 1 [Source:HGNC Symbol;Acc:HGNC:24290]	CSGALNACT1	52.4539	14.2861	2.60377	9.12734e-07	79.8936	14.2861	3.72168	1.26469e-11	Y	Y	101.249	70.4852	67.9471	69.6166	45.6441	42.101	15.5209	15.6206	11.7169
ENSG00000153162	ENSG00000153162	bone morphogenetic protein 6 [Source:HGNC Symbol;Acc:HGNC:1073]	BMP6	20.792	2.68176	2.60358	8.72172e-05	18.8433	2.68176	2.42862	0.000236837	Y	Y	26.1654	14.6844	15.6801	28.2817	20.9963	13.0981	2.21727	3.12412	2.70389
ENSG00000178075	ENSG00000178075	GRAM domain containing 1C [Source:HGNC Symbol;Acc:HGNC:25252]	GRAMD1C	186.35	63.8645	2.59511	3.7366e-12	260.788	63.8645	3.54295	6.35444e-21	Y	Y	290.094	222.224	270.046	219.727	199.921	139.401	73.1698	56.2342	62.1895
ENSG00000152580	ENSG00000152580	immunoglobulin superfamily member 10 [Source:HGNC Symbol;Acc:HGNC:26384]	IGSF10	99.3849	33.2191	2.59166	5.03327e-11	163.811	33.2191	4.141	7.72163e-24	Y	Y	156.992	165.444	168.997	113.127	83.9851	101.042	34.3676	36.4481	28.8415
ENSG00000101187	ENSG00000101187	solute carrier organic anion transporter family member 4A1 [Source:HGNC Symbol;Acc:HGNC:10953]	SLCO4A1	10284.2	3830.42	2.59092	4.55391e-30	10257.7	3830.42	2.58466	7.36099e-30	Y	Y	10066.8	11020.2	9685.95	12091.5	9902.94	8858.05	4231.66	3937.44	3322.18
ENSG00000166920	ENSG00000166920	chromosome 15 open reading frame 48 [Source:HGNC Symbol;Acc:HGNC:29898]	C15orf48	11097	3591.97	2.59077	1.2893e-08	9958.23	3591.97	2.36188	3.50655e-07	Y	Y	11494.6	8876.24	9503.89	14751.1	10512.7	8027.26	4386.86	3435.49	2953.55
ENSG00000278552	ENSG00000278552	abhydrolase domain containing 17A (ABHD17A) pseudogene		19.823	2.26552	2.5845	0.000100243	19.2453	2.26552	2.54668	0.000128882	Y	Y	11.3762	25.453	20.9068	19.5797	13.6932	26.1962	1.10863	2.08275	3.60519
ENSG00000261298	ENSG00000261298	novel transcript		25.2496	4.96971	2.57629	4.41257e-05	26.5769	4.96971	2.67502	2.37144e-05	Y	Y	21.6149	29.3688	28.7469	18.4919	30.1251	27.1318	4.43454	4.1655	6.30908
ENSG00000230658	ENSG00000230658	KLHL7 divergent transcript [Source:HGNC Symbol;Acc:HGNC:43431]	KLHL7-DT	85.3994	28.156	2.57132	7.55228e-09	73.1955	28.156	2.23569	1.29191e-06	Y	Y	81.909	63.6325	74.045	89.1963	94.0268	72.9751	29.9331	30.1999	24.335
ENSG00000172318	ENSG00000172318	beta-1,3-galactosyltransferase 1 [Source:HGNC Symbol;Acc:HGNC:916]	B3GALT1	64.9494	19.9519	2.56851	1.87218e-07	75.243	19.9519	2.92513	2.46524e-09	Y	Y	58.0188	83.2117	84.4984	54.388	70.2919	70.1684	17.7381	24.993	17.1247
ENSG00000158106	ENSG00000158106	rhophilin Rho GTPase binding protein 1 [Source:HGNC Symbol;Acc:HGNC:19973]	RHPN1	560.767	206.931	2.56229	6.63798e-20	566.974	206.931	2.59265	2.41127e-20	Y	Y	589.289	530.597	581.035	690.727	494.782	496.792	230.596	207.233	182.963
ENSG00000102048	ENSG00000102048	ankyrin repeat and SOCS box containing 9 [Source:HGNC Symbol;Acc:HGNC:17184]	ASB9	96.649	32.3415	2.55328	2.39662e-09	90.4452	32.3415	2.40552	2.92375e-08	Y	Y	78.4961	105.728	87.1117	89.1963	91.2882	109.463	26.6072	34.3654	36.0519
ENSG00000166510	ENSG00000166510	coiled-coil domain containing 68 [Source:HGNC Symbol;Acc:HGNC:24350]	CCDC68	219.171	79.283	2.55137	3.16551e-16	336.119	79.283	3.83462	2.62985e-33	Y	Y	354.939	332.847	320.571	246.921	230.959	179.631	84.2562	69.7721	83.8207
ENSG00000167216	ENSG00000167216	katanin catalytic subunit A1 like 2 [Source:HGNC Symbol;Acc:HGNC:25387]	KATNAL2	190.576	69.7168	2.55057	1.47571e-17	226.422	69.7168	3.00923	2.73878e-24	Y	Y	234.351	211.456	233.459	194.709	188.967	188.051	72.0612	67.6893	69.3999
ENSG00000182752	ENSG00000182752	pappalysin 1 [Source:HGNC Symbol;Acc:HGNC:8602]	PAPPA	1255.64	475.476	2.54343	6.57127e-29	1142.31	475.476	2.3199	1.74709e-23	Y	Y	1176.3	1143.43	1107.19	1184.57	1310.9	1271.45	380.261	487.363	558.805
ENSG00000157601	ENSG00000157601	MX dynamin like GTPase 1 [Source:HGNC Symbol;Acc:HGNC:7532]	MX1	217.914	76.7073	2.54041	2.10418e-12	377.997	76.7073	4.24188	4.67661e-29	Y	Y	433.435	341.657	358.9	279.554	189.879	184.309	63.1921	88.5168	78.4129
ENSG00000163694	ENSG00000163694	RNA binding motif protein 47 [Source:HGNC Symbol;Acc:HGNC:30358]	RBM47	920.479	351.767	2.52604	8.60342e-29	1156.93	351.767	3.15361	3.02694e-44	Y	Y	1205.88	1122.87	1142.03	1024.67	964.916	771.852	360.306	375.936	319.059
ENSG00000166770	ENSG00000166770	ZNF667 antisense RNA 1 (head to head) [Source:HGNC Symbol;Acc:HGNC:44321]	ZNF667-AS1	286.741	107.285	2.52136	1.90591e-20	300.002	107.285	2.63589	2.12714e-22	Y	Y	290.094	285.857	324.056	282.817	294.861	282.545	92.0166	107.262	122.576
ENSG00000266976	ENSG00000266976	uncharacterized LOC102724908 [Source:NCBI gene;Acc:102724908]		19.3363	2.31222	2.5192	0.000163125	16.8384	2.31222	2.31502	0.000507902	Y	Y	7.96337	22.5161	20.0357	16.3164	16.4319	25.2606	1.10863	3.12412	2.70389
ENSG00000172817	ENSG00000172817	cytochrome P450 family 7 subfamily B member 1 [Source:HGNC Symbol;Acc:HGNC:2652]	CYP7B1	12.2293	0.347125	2.51185	0.000494074	9.61575	0.347125	2.17096	0.00149637	Y	Y	10.2386	10.7686	7.84005	10.8776	15.519	10.2914	0	1.04137	0
ENSG00000231648	ENSG00000231648	long intergenic non-protein coding RNA 1698 [Source:HGNC Symbol;Acc:HGNC:52486]	LINC01698	44.4156	11.7439	2.50148	2.19802e-05	36.2078	11.7439	2.11858	0.000602831	Y	Y	45.505	35.2426	27.8757	42.4226	34.6895	56.1347	6.6518	11.4551	17.1247
ENSG00000166396	ENSG00000166396	serpin family B member 7 [Source:HGNC Symbol;Acc:HGNC:13902]	SERPINB7	1413.35	541.186	2.50082	2.33796e-23	1471.61	541.186	2.60029	2.63653e-25	Y	Y	1585.85	1411.66	1417.31	1687.12	1402.19	1150.76	569.838	483.198	570.521
ENSG00000101825	ENSG00000101825	matrix remodeling associated 5 [Source:HGNC Symbol;Acc:HGNC:7539]	MXRA5	88.485	26.7485	2.5007	1.69261e-07	381.03	26.7485	8.92865	1.00438e-36	Y	Y	493.729	359.279	290.082	126.18	80.3336	58.9414	21.064	31.2412	27.9402
ENSG00000231298	ENSG00000231298	mitotically associated long non coding RNA [Source:HGNC Symbol;Acc:HGNC:44678]	MANCR	261.09	98.2792	2.49394	1.01782e-19	653.134	98.2792	6.04595	2.12371e-78	Y	Y	618.868	718.557	621.978	266.501	250.13	266.64	107.537	79.1444	108.156
ENSG00000133985	ENSG00000133985	tetratricopeptide repeat domain 9 [Source:HGNC Symbol;Acc:HGNC:20267]	TTC9	873.699	340.115	2.49166	9.84035e-31	1087.82	340.115	3.08526	6.54057e-47	Y	Y	1098.95	1018.12	1146.39	928.947	915.621	776.53	383.587	324.909	311.849
ENSG00000120875	ENSG00000120875	dual specificity phosphatase 4 [Source:HGNC Symbol;Acc:HGNC:3070]	DUSP4	174.858	60.6824	2.48873	6.19351e-09	158.936	60.6824	2.28604	1.81302e-07	Y	Y	186.57	159.571	130.668	234.956	167.057	122.561	58.7576	65.6066	57.683
ENSG00000172005	ENSG00000172005	mal, T cell differentiation protein [Source:HGNC Symbol;Acc:HGNC:6817]	MAL	188.646	69.5356	2.48734	5.57608e-14	254.889	69.5356	3.31832	5.55822e-24	Y	Y	233.213	237.887	293.566	213.201	187.141	165.597	65.4094	72.8962	70.3012
ENSG00000077420	ENSG00000077420	amyloid beta precursor protein binding family B member 1 interacting protein [Source:HGNC Symbol;Acc:HGNC:17379]	APBB1IP	2830.09	1114.51	2.48156	1.8544e-39	2336.81	1114.51	2.0573	6.49099e-25	Y	Y	2665.45	2070.5	2274.49	2948.92	2900.23	2641.14	1141.89	1103.86	1097.78
ENSG00000242265	ENSG00000242265	paternally expressed 10 [Source:HGNC Symbol;Acc:HGNC:14005]	PEG10	27924.2	11013.5	2.47323	1.90869e-36	42199.7	11013.5	3.69766	1.06085e-75	Y	Y	36101.4	47691.1	42806.7	25588.5	29480.6	28703.5	10365.7	11129.2	11545.6
ENSG00000180914	ENSG00000180914	oxytocin receptor [Source:HGNC Symbol;Acc:HGNC:8529]	OXTR	908.449	355.845	2.47083	4.08776e-30	1282.72	355.845	3.45908	5.48185e-57	Y	Y	1221.81	1296.14	1330.2	999.651	921.098	804.597	386.913	309.288	371.335
ENSG00000182389	ENSG00000182389	calcium voltage-gated channel auxiliary subunit beta 4 [Source:HGNC Symbol;Acc:HGNC:1404]	CACNB4	17.45	2.42617	2.46908	0.000255825	15.7519	2.42617	2.29005	0.000685649	Y	Y	18.202	18.6003	10.4534	16.3164	18.2576	17.776	4.43454	1.04137	1.8026
ENSG00000100031	ENSG00000100031	gamma-glutamyltransferase 1 [Source:HGNC Symbol;Acc:HGNC:4250]	GGT1	1879.31	740.406	2.46361	4.10315e-30	1673.53	740.406	2.20218	4.13625e-23	Y	Y	1655.24	1741.57	1623.76	2115.69	1928.01	1594.23	764.957	795.61	660.651
ENSG00000165521	ENSG00000165521	echinoderm microtubule associated protein like 5 [Source:HGNC Symbol;Acc:HGNC:18197]	EML5	367.042	139.528	2.46068	3.83971e-16	454.941	139.528	3.01504	4.78441e-24	Y	Y	528.995	415.079	420.75	422.051	382.498	296.578	135.253	136.42	146.912
ENSG00000165471	ENSG00000165471	mannose binding lectin 2 [Source:HGNC Symbol;Acc:HGNC:6922]	MBL2	21.3597	4.1151	2.45715	0.000126086	25.2646	4.1151	2.79294	1.64012e-05	Y	Y	26.1654	23.4951	26.1335	26.1062	15.519	22.4539	4.43454	5.20687	2.70389
ENSG00000220205	ENSG00000220205	vesicle associated membrane protein 2 [Source:HGNC Symbol;Acc:HGNC:12643]	VAMP2	1024.56	397.09	2.44072	3.71081e-17	862.859	397.09	2.07467	1.15299e-11	Y	Y	1001.11	745.968	841.499	1263.98	966.742	842.956	434.584	365.522	391.163
ENSG00000104321	ENSG00000104321	transient receptor potential cation channel subfamily A member 1 [Source:HGNC Symbol;Acc:HGNC:497]	TRPA1	67.3278	23.0441	2.43032	1.38965e-08	160.358	23.0441	5.42644	4.59812e-29	Y	Y	161.543	156.634	162.899	65.2656	70.2919	66.426	24.3899	17.7034	27.0389
ENSG00000153933	ENSG00000153933	diacylglycerol kinase epsilon [Source:HGNC Symbol;Acc:HGNC:2852]	DGKE	483.514	191.076	2.42799	1.24773e-23	446.058	191.076	2.24143	1.64339e-19	Y	Y	489.178	423.89	425.105	462.298	515.778	472.467	174.056	180.158	219.015
ENSG00000232415	ENSG00000232415	ELN antisense RNA 1 [Source:HGNC Symbol;Acc:HGNC:40212]	ELN-AS1	27.8991	6.51885	2.4236	9.92486e-05	30.1024	6.51885	2.58439	3.29553e-05	Y	Y	29.5782	29.3688	31.3602	40.2471	20.9963	22.4539	7.76044	7.28962	4.50649
ENSG00000129226	ENSG00000129226	CD68 molecule [Source:HGNC Symbol;Acc:HGNC:1693]	CD68	34.3982	8.73739	2.41452	5.98463e-05	39.9146	8.73739	2.72428	5.3265e-06	Y	Y	30.7159	41.1164	47.9114	35.8961	40.1668	27.1318	5.54317	6.24825	14.4208
ENSG00000119042	ENSG00000119042	SATB homeobox 2 [Source:HGNC Symbol;Acc:HGNC:21637]	SATB2	1874.15	766.336	2.40947	7.61232e-56	1660.99	766.336	2.13891	1.65613e-41	Y	Y	1588.12	1740.59	1654.25	1770.87	1927.09	1924.48	757.197	741.459	800.352
ENSG00000166979	ENSG00000166979	eva-1 homolog C [Source:HGNC Symbol;Acc:HGNC:13239]	EVA1C	12.2142	0.647557	2.38641	0.000819635	33.7718	0.647557	4.91663	2.23108e-06	Y	Y	37.5416	33.2847	30.4891	10.8776	17.3448	8.4202	0	1.04137	0.901298
ENSG00000124006	ENSG00000124006	obscurin like 1 [Source:HGNC Symbol;Acc:HGNC:29092]	OBSL1	1837.06	756.801	2.38545	2.80952e-45	1847.05	756.801	2.39883	7.81306e-46	Y	Y	1862.29	1812.06	1866.8	1927.51	1790.16	1793.5	720.612	847.679	702.111
ENSG00000137941	ENSG00000137941	tubulin tyrosine ligase like 7 [Source:HGNC Symbol;Acc:HGNC:26242]	TTLL7	504.674	204.236	2.38517	4.37442e-23	523.496	204.236	2.47165	6.00408e-25	Y	Y	546.06	513.954	510.475	548.231	515.778	450.013	216.184	220.771	175.753
ENSG00000151651	ENSG00000151651	ADAM metallopeptidase domain 8 [Source:HGNC Symbol;Acc:HGNC:215]	ADAM8	33.0031	9.29371	2.37538	5.11519e-05	37.6016	9.29371	2.64982	5.08234e-06	Y	Y	36.404	37.2005	39.2003	36.9838	26.4736	35.552	6.6518	10.4137	10.8156
ENSG00000271181	ENSG00000271181	stathmin-like 3 (STMN3) pseudogene		16.0959	1.31753	2.37399	0.000410426	16.3088	1.31753	2.3914	0.000399563	Y	Y	21.6149	18.6003	8.71117	26.1062	10.9546	11.2269	1.10863	1.04137	1.8026
ENSG00000172164	ENSG00000172164	syntrophin beta 1 [Source:HGNC Symbol;Acc:HGNC:11168]	SNTB1	3983.49	1645.45	2.36669	7.43765e-34	3545.65	1645.45	2.11291	1.42667e-25	Y	Y	3549.39	3425.38	3662.18	4229.21	4292.37	3428.89	1695.1	1756.8	1484.44
ENSG00000165215	ENSG00000165215	claudin 3 [Source:HGNC Symbol;Acc:HGNC:2045]	CLDN3	49.6061	16.1802	2.36625	1.24293e-05	41.4514	16.1802	2.03612	0.000408513	Y	Y	46.6426	33.2847	44.427	54.388	40.1668	54.2635	17.7381	14.5792	16.2234
ENSG00000221866	ENSG00000221866	plexin A4 [Source:HGNC Symbol;Acc:HGNC:9102]	PLXNA4	20.2416	3.55879	2.36171	9.72837e-05	60.8465	3.55879	5.54066	3.74153e-12	Y	Y	40.9545	75.38	66.2049	16.3164	20.0834	24.325	3.3259	1.04137	6.30908
ENSG00000143198	ENSG00000143198	microsomal glutathione S-transferase 3 [Source:HGNC Symbol;Acc:HGNC:7064]	MGST3	2282.44	926.126	2.35928	1.65328e-18	2094.68	926.126	2.17391	3.22714e-15	Y	Y	2262.73	2026.45	1994.86	2589.96	2275.81	1981.55	1070.94	994.512	712.926
ENSG00000154027	ENSG00000154027	adenylate kinase 5 [Source:HGNC Symbol;Acc:HGNC:365]	AK5	2029.05	722.68	2.35242	9.69942e-07	2273.23	722.68	2.5892	4.18789e-08	Y	Y	2531.21	2158.61	2129.88	2725.93	1931.66	1429.56	904.645	701.886	561.508
ENSG00000152578	ENSG00000152578	glutamate ionotropic receptor AMPA type subunit 4 [Source:HGNC Symbol;Acc:HGNC:4574]	GRIA4	17.2979	3.07373	2.341	0.000110962	63.3574	3.07373	6.73187	1.05415e-13	Y	Y	59.1565	73.4221	57.4937	19.5797	17.3448	14.9693	4.43454	2.08275	2.70389
ENSG00000110328	ENSG00000110328	polypeptide N-acetylgalactosaminyltransferase 18 [Source:HGNC Symbol;Acc:HGNC:30488]	GALNT18	2595.26	1087.12	2.33912	1.68437e-36	2400.43	1087.12	2.16632	3.52112e-30	Y	Y	2691.62	2236.93	2272.74	2715.05	2675.66	2395.08	1060.96	1154.88	1045.51
ENSG00000108684	ENSG00000108684	acid sensing ion channel subunit 2 [Source:HGNC Symbol;Acc:HGNC:99]	ASIC2	36.3429	10.8874	2.30549	1.84826e-05	99.3679	10.8874	5.53393	2.33662e-18	Y	Y	83.0466	101.812	113.245	43.5104	36.5153	29.0029	8.86907	9.37237	14.4208
ENSG00000182324	ENSG00000182324	potassium voltage-gated channel subfamily J member 14 [Source:HGNC Symbol;Acc:HGNC:6260]	KCNJ14	123.803	48.9828	2.30163	8.44031e-10	110.423	48.9828	2.0722	1.33553e-07	Y	Y	97.8357	126.286	107.147	122.917	127.803	120.69	47.6713	47.9032	51.374
ENSG00000266278	ENSG00000266278	long intergenic non-protein coding RNA 1910 [Source:HGNC Symbol;Acc:HGNC:52729]	LINC01910	33.2846	9.66169	2.29982	0.000145783	37.4979	9.66169	2.51908	2.54582e-05	Y	Y	31.8535	44.0532	36.5869	23.9307	31.9509	43.9722	13.3036	9.37237	6.30908
ENSG00000165092	ENSG00000165092	aldehyde dehydrogenase 1 family member A1 [Source:HGNC Symbol;Acc:HGNC:402]	ALDH1A1	1659.24	624.16	2.29474	3.75378e-06	140.489	624.16	-3.33721	1.47829e-12	Y		162.68	142.928	115.859	1092.11	1875.06	2010.56	712.852	667.521	492.109
ENSG00000164120	ENSG00000164120	15-hydroxyprostaglandin dehydrogenase [Source:HGNC Symbol;Acc:HGNC:5154]	HPGD	34.1665	9.33855	2.28759	7.75193e-05	81.6373	9.33855	4.63993	6.12083e-13	Y	Y	78.4961	71.4641	94.9518	40.2471	17.3448	44.9078	8.86907	8.33099	10.8156
ENSG00000260912	ENSG00000260912	novel transcript, overlapping ACER2		117.251	46.2251	2.28747	1.30407e-08	109.914	46.2251	2.1507	1.87281e-07	Y	Y	125.139	101.812	102.792	120.741	115.936	115.076	59.8662	36.4481	42.361
ENSG00000205309	ENSG00000205309	5',3'-nucleotidase, mitochondrial [Source:HGNC Symbol;Acc:HGNC:15769]	NT5M	213.258	82.2943	2.28295	1.60084e-07	197.907	82.2943	2.13737	1.79362e-06	Y	Y	232.075	183.066	178.579	283.905	211.789	144.079	94.2339	89.5582	63.0908
ENSG00000139971	ENSG00000139971	armadillo-like helical domain containing 4 [Source:HGNC Symbol;Acc:HGNC:19846]	ARMH4	783.242	323.445	2.27479	9.87055e-13	1350.76	323.445	3.7957	1.42505e-32	Y	Y	1474.36	1267.75	1310.16	996.388	770.472	582.865	352.546	344.695	273.093
ENSG00000167524	ENSG00000167524	uncharacterized serine/threonine-protein kinase SgK494 [Source:NCBI gene;Acc:124923]		417.755	166.884	2.25958	1.02407e-08	446.765	166.884	2.39959	6.51568e-10	Y	Y	484.628	397.458	458.208	373.102	422.664	457.498	133.036	119.758	247.857
ENSG00000184979	ENSG00000184979	ubiquitin specific peptidase 18 [Source:HGNC Symbol;Acc:HGNC:12616]	USP18	79.9524	30.3938	2.25895	1.27999e-06	81.472	30.3938	2.29971	7.52513e-07	Y	Y	89.8723	74.401	80.1428	95.7228	73.0306	71.1039	39.9108	26.0344	25.2363
ENSG00000283217	ENSG00000283217	novel transcript		13.37	1.66466	2.25393	0.00122995	11.7562	1.66466	2.08606	0.00295586	Y	Y	10.2386	13.7055	11.3245	14.1409	9.12882	16.8404	1.10863	2.08275	1.8026
ENSG00000171298	ENSG00000171298	glucosidase alpha, acid [Source:HGNC Symbol;Acc:HGNC:4065]	GAA	449.4	182.836	2.25264	1.47462e-09	586.078	182.836	2.87551	1.22422e-15	Y	Y	674.611	553.113	530.51	608.058	409.884	330.259	186.25	207.233	155.023
ENSG00000128242	ENSG00000128242	galactose-3-O-sulfotransferase 1 [Source:HGNC Symbol;Acc:HGNC:24240]	GAL3ST1	1936.66	835.464	2.24317	3.86757e-20	1836.05	835.464	2.13127	1.08524e-17	Y	Y	1678	2062.67	1767.5	1976.46	1938.96	1894.55	776.044	1017.42	712.926
ENSG00000104783	ENSG00000104783	potassium calcium-activated channel subfamily N member 4 [Source:HGNC Symbol;Acc:HGNC:6293]	KCNN4	1575.2	673.527	2.24041	5.9164e-16	1536.36	673.527	2.18874	4.87779e-15	Y	Y	1588.12	1493.89	1527.07	1953.62	1435.05	1336.94	786.021	655.024	579.534
ENSG00000159556	ENSG00000159556	ISL LIM homeobox 2 [Source:HGNC Symbol;Acc:HGNC:18524]	ISL2	13.5933	2.10332	2.2355	0.000514974	35.989	2.10332	4.65462	1.45362e-08	Y	Y	35.2664	35.2426	37.458	13.0531	13.6932	14.0337	3.3259	2.08275	0.901298
ENSG00000167925	ENSG00000167925	GH3 domain containing [Source:HGNC Symbol;Acc:HGNC:24438]	GHDC	408.176	176.357	2.23546	1.74092e-19	374.906	176.357	2.06022	1.07444e-15	Y	Y	387.93	370.047	366.74	452.508	407.145	364.875	178.49	187.447	163.135
ENSG00000115935	ENSG00000115935	WAS/WASL interacting protein family member 1 [Source:HGNC Symbol;Acc:HGNC:12736]	WIPF1	1795.89	786.725	2.23289	7.92828e-29	1794.49	786.725	2.23113	1.06571e-28	Y	Y	1953.3	1705.35	1724.81	1999.3	1781.03	1607.32	802.651	824.768	732.755
ENSG00000259495	ENSG00000259495	novel transcript		35.5898	9.43193	2.23269	0.000269454	59.0716	9.43193	3.26254	1.12458e-07	Y	Y	88.7347	44.0532	44.427	53.3002	31.9509	21.5183	8.86907	10.4137	9.01298
ENSG00000149557	ENSG00000149557	fasciculation and elongation protein zeta 1 [Source:HGNC Symbol;Acc:HGNC:3659]	FEZ1	1597.06	689.882	2.22331	2.77117e-16	1453.24	689.882	2.03194	6.15066e-13	Y	Y	1606.33	1405.79	1347.62	1901.4	1551.9	1337.88	761.631	732.086	575.929
ENSG00000197016	ENSG00000197016	zinc finger protein 470 [Source:HGNC Symbol;Acc:HGNC:22220]	ZNF470	249.345	107.375	2.21006	1.04793e-14	241.198	107.375	2.14368	1.42509e-13	Y	Y	235.488	247.677	240.428	263.238	219.092	265.704	103.103	107.262	111.761
ENSG00000162755	ENSG00000162755	kelch domain containing 9 [Source:HGNC Symbol;Acc:HGNC:28489]	KLHDC9	72.5889	26.8385	2.20032	2.52499e-05	77.8704	26.8385	2.34504	4.85817e-06	Y	Y	86.4594	62.6535	84.4984	102.249	57.5116	58.0058	28.8245	29.1585	22.5324
ENSG00000197442	ENSG00000197442	mitogen-activated protein kinase kinase kinase 5 [Source:HGNC Symbol;Acc:HGNC:6857]	MAP3K5	1979.88	876.857	2.19979	2.68545e-23	1827.26	876.857	2.03578	5.55493e-19	Y	Y	1888.46	1755.28	1838.06	2278.86	2000.12	1660.65	931.252	887.251	812.069
ENSG00000185046	ENSG00000185046	ankyrin repeat and sterile alpha motif domain containing 1B [Source:HGNC Symbol;Acc:HGNC:24600]	ANKS1B	90.1305	35.899	2.19914	5.07791e-07	123.216	35.899	2.9204	2.47727e-12	Y	Y	144.478	114.538	110.632	108.776	84.898	76.7174	38.8022	36.4481	32.4467
ENSG00000203667	ENSG00000203667	cytochrome c oxidase assembly factor COX20 [Source:HGNC Symbol;Acc:HGNC:26970]	COX20	836.106	369.248	2.19656	1.69935e-20	783.724	369.248	2.06331	2.28958e-17	Y	Y	739.456	776.316	835.401	748.379	860.848	899.091	394.674	309.288	403.781
ENSG00000169255	ENSG00000169255	beta-1,3-N-acetylgalactosaminyltransferase 1 (globoside blood group) [Source:HGNC Symbol;Acc:HGNC:918]	B3GALNT1	1539.99	692.705	2.18915	4.0921e-39	1876.49	692.705	2.65988	2.30493e-61	Y	Y	1864.57	1802.27	1962.63	1556.58	1493.47	1569.9	733.916	625.866	718.334
ENSG00000156299	ENSG00000156299	T cell lymphoma invasion and metastasis 1 [Source:HGNC Symbol;Acc:HGNC:11805]	TIAM1	16.0784	3.098	2.18735	0.000759676	29.1307	3.098	3.32565	1.43897e-06	Y	Y	35.2664	30.3478	21.7779	14.1409	20.9963	13.0981	3.3259	4.1655	1.8026
ENSG00000165186	ENSG00000165186	patched domain containing 1 [Source:HGNC Symbol;Acc:HGNC:26392]	PTCHD1	275.279	116.389	2.1857	1.18241e-09	321.14	116.389	2.51967	3.29377e-13	Y	Y	294.645	329.91	338.865	216.464	288.471	320.903	94.2339	106.22	148.714
ENSG00000172915	ENSG00000172915	neurobeachin [Source:HGNC Symbol;Acc:HGNC:7648]	NBEA	608.049	266.057	2.1771	3.53849e-14	602.288	266.057	2.15642	8.25456e-14	Y	Y	671.198	558.987	576.68	646.129	597.025	580.994	203.989	269.716	324.467
ENSG00000178498	ENSG00000178498	deltex E3 ubiquitin ligase 3 [Source:HGNC Symbol;Acc:HGNC:24457]	DTX3	14.7848	2.31222	2.17107	0.000830678	29.6634	2.31222	3.53704	9.30291e-07	Y	Y	31.8535	28.3899	28.7469	17.4042	7.30306	19.6471	1.10863	3.12412	2.70389
ENSG00000144452	ENSG00000144452	ATP binding cassette subfamily A member 12 [Source:HGNC Symbol;Acc:HGNC:14637]	ABCA12	168.902	64.3586	2.17076	3.1386e-05	186.172	64.3586	2.35204	3.76627e-06	Y	Y	128.552	241.803	188.161	88.1085	209.963	208.634	57.649	68.7307	66.696
ENSG00000188921	ENSG00000188921	3-hydroxyacyl-CoA dehydratase 4 [Source:HGNC Symbol;Acc:HGNC:20920]	HACD4	10.8623	0	2.16258	5.79384e-05	23.1432	0	3.41046	8.76381e-07	Y	Y	25.0277	23.4951	20.9068	19.5797	3.65153	9.35578	0	0	0
ENSG00000077264	ENSG00000077264	p21 (RAC1) activated kinase 3 [Source:HGNC Symbol;Acc:HGNC:8592]	PAK3	303.198	134.728	2.16078	1.39355e-15	290.723	134.728	2.0711	6.71393e-14	Y	Y	303.746	288.793	279.629	288.256	334.115	287.222	119.732	144.751	139.701
ENSG00000167619	ENSG00000167619	transmembrane protein 145 [Source:HGNC Symbol;Acc:HGNC:26912]	TMEM145	92.42	37.5855	2.15829	1.02573e-06	112.269	37.5855	2.58112	8.78359e-10	Y	Y	94.4228	104.749	137.637	85.933	94.0268	97.3001	34.3676	33.324	45.0649
ENSG00000163131	ENSG00000163131	cathepsin S [Source:HGNC Symbol;Acc:HGNC:2545]	CTSS	312.79	132.432	2.15214	8.60596e-08	300.101	132.432	2.07488	4.02762e-07	Y	Y	342.425	272.151	285.726	431.841	285.732	220.796	141.905	136.42	118.971
ENSG00000070190	ENSG00000070190	dual adaptor of phosphotyrosine and 3-phosphoinositides 1 [Source:HGNC Symbol;Acc:HGNC:16500]	DAPP1	10.3756	0	2.15006	6.40512e-05	24.8647	0	3.64993	4.94196e-07	Y	Y	38.6792	17.6213	18.2935	16.3164	6.39017	8.4202	0	0	0
ENSG00000237975	ENSG00000237975	FLG antisense RNA 1 [Source:HGNC Symbol;Acc:HGNC:27913]	FLG-AS1	134.13	56.4662	2.14575	1.44231e-07	175.801	56.4662	2.74372	1.07136e-12	Y	Y	170.644	170.339	186.419	104.425	132.368	165.597	59.8662	43.7377	65.7947
ENSG00000134072	ENSG00000134072	calcium/calmodulin dependent protein kinase I [Source:HGNC Symbol;Acc:HGNC:1459]	CAMK1	1213.15	553.523	2.1415	1.66146e-22	1369.32	553.523	2.41018	7.08634e-30	Y	Y	1288.93	1424.39	1394.66	1265.06	1246.08	1128.31	606.423	593.583	460.563
ENSG00000167972	ENSG00000167972	ATP binding cassette subfamily A member 3 [Source:HGNC Symbol;Acc:HGNC:33]	ABCA3	494.233	211.289	2.13807	4.88358e-08	780.137	211.289	3.2418	3.50243e-18	Y	Y	913.512	703.873	723.027	693.991	450.964	337.744	198.445	221.813	213.608
ENSG00000100154	ENSG00000100154	tetratricopeptide repeat domain 28 [Source:HGNC Symbol;Acc:HGNC:29179]	TTC28	1194.46	544.036	2.13515	1.10031e-19	1219.53	544.036	2.17773	1.18846e-20	Y	Y	1317.37	1230.55	1110.67	1278.12	1241.52	1063.75	515.515	628.99	487.602
ENSG00000186364	ENSG00000186364	nudix hydrolase 17 [Source:HGNC Symbol;Acc:HGNC:26618]	NUDT17	45.5042	17.1768	2.13098	9.69164e-05	49.6143	17.1768	2.29342	1.70823e-05	Y	Y	44.3673	54.8218	49.6537	42.4226	53.86	40.2299	15.5209	19.7861	16.2234
ENSG00000110492	ENSG00000110492	midkine [Source:HGNC Symbol;Acc:HGNC:6972]	MDK	34.776	11.8341	2.12986	6.26451e-05	173.172	11.8341	8.67523	1.52268e-29	Y	Y	192.259	163.486	163.77	43.5104	37.4282	23.3895	17.7381	11.4551	6.30908
ENSG00000185467	ENSG00000185467	karyopherin subunit alpha 7 [Source:HGNC Symbol;Acc:HGNC:21839]	KPNA7	16.4865	2.68176	2.12943	0.00107445	26.8026	2.68176	2.94909	1.29107e-05	Y	Y	27.303	31.3267	21.7779	28.2817	13.6932	7.48463	2.21727	3.12412	2.70389
ENSG00000260398	ENSG00000260398	novel transcript, overlapping to PKIA		26.3094	8.04528	2.12817	0.000980472	26.3294	8.04528	2.14306	0.000944379	Y	Y	17.0644	32.3057	29.618	27.194	26.4736	25.2606	6.6518	9.37237	8.11168
ENSG00000101331	ENSG00000101331	CCM2 like scaffold protein [Source:HGNC Symbol;Acc:HGNC:16153]	CCM2L	811.094	294.056	2.1281	0.000198641	1223.3	294.056	2.93134	6.25886e-08	Y	Y	1453.88	1106.23	1109.8	1145.41	769.56	518.31	337.025	354.067	191.075
ENSG00000136114	ENSG00000136114	thrombospondin type 1 domain containing 1 [Source:HGNC Symbol;Acc:HGNC:17754]	THSD1	539.987	243.545	2.12738	1.12619e-14	706.672	243.545	2.75571	3.87889e-26	Y	Y	725.804	723.452	670.76	645.041	524.907	450.013	226.161	272.84	231.633
ENSG00000153822	ENSG00000153822	potassium voltage-gated channel subfamily J member 16 [Source:HGNC Symbol;Acc:HGNC:6262]	KCNJ16	300.194	128.821	2.12734	7.23519e-08	664.867	128.821	4.39224	3.39335e-28	Y	Y	515.344	823.306	655.951	208.85	324.986	366.747	138.579	120.799	127.083
ENSG00000102043	ENSG00000102043	myotubularin related protein 8 [Source:HGNC Symbol;Acc:HGNC:16825]	MTMR8	88.8397	36.848	2.12266	0.000151351	0	36.848	-5.53962	3.31417e-09	Y		0	0	0	88.1085	86.7238	91.6867	26.6072	34.3654	49.5714
ENSG00000169439	ENSG00000169439	syndecan 2 [Source:HGNC Symbol;Acc:HGNC:10659]	SDC2	7526.69	3495.01	2.1207	9.13268e-34	8526.17	3495.01	2.39707	1.59522e-45	Y	Y	8205.68	8430.81	8942.02	8270.24	7670.03	6639.8	3345.86	3517.76	3621.41
ENSG00000197696	ENSG00000197696	neuromedin B [Source:HGNC Symbol;Acc:HGNC:7842]	NMB	45.595	16.9676	2.11729	0.000133757	56.5769	16.9676	2.52422	1.76223e-06	Y	Y	69.3951	56.7797	43.5559	42.4226	42.9055	51.4568	14.4122	16.662	19.8285
ENSG00000169047	ENSG00000169047	insulin receptor substrate 1 [Source:HGNC Symbol;Acc:HGNC:6125]	IRS1	5333.75	2481.54	2.11661	6.6977e-33	5052.52	2481.54	2.00713	2.14735e-28	Y	Y	4674.5	5765.1	4717.97	5209.28	5416.13	5375.83	2420.15	2571.15	2453.33
ENSG00000112539	ENSG00000112539	chromosome 6 open reading frame 118 [Source:HGNC Symbol;Acc:HGNC:21233]	C6orf118	16.9656	4.04599	2.10321	0.00147622	26.7047	4.04599	2.9186	1.0038e-05	Y	Y	32.9911	24.474	22.649	18.4919	13.6932	18.7116	3.3259	5.20687	3.60519
ENSG00000184500	ENSG00000184500	protein S [Source:HGNC Symbol;Acc:HGNC:9456]	PROS1	251.211	112.033	2.10302	1.96672e-09	399.2	112.033	3.24181	8.69437e-23	Y	Y	424.334	369.068	404.198	243.658	297.6	212.376	111.972	138.503	85.6233
ENSG00000112852	ENSG00000112852	protocadherin beta 2 [Source:HGNC Symbol;Acc:HGNC:8687]	PCDHB2	39.7324	13.4104	2.10209	0.000559283	49.6284	13.4104	2.50702	1.65919e-05	Y	Y	45.505	60.6956	42.6847	41.3349	29.2122	48.6501	5.54317	16.662	18.026
ENSG00000276570	ENSG00000276570	novel transcript		126.034	54.79	2.10096	5.6695e-08	135.608	54.79	2.24723	2.43352e-09	Y	Y	143.341	130.202	133.281	128.356	115.023	134.723	41.0195	59.3583	63.9921
ENSG00000153283	ENSG00000153283	CD96 molecule [Source:HGNC Symbol;Acc:HGNC:16892]	CD96	16.0936	2.81999	2.09788	0.00212336	15.1549	2.81999	2.02478	0.00342944	Y	Y	19.3396	7.83169	18.2935	20.6674	18.2576	9.35578	4.43454	3.12412	0.901298
ENSG00000123243	ENSG00000123243	inter-alpha-trypsin inhibitor heavy chain family member 5 [Source:HGNC Symbol;Acc:HGNC:21449]	ITIH5	39.5326	14.0118	2.09786	0.000582273	38.5428	14.0118	2.04843	0.000953207	Y	Y	48.9178	36.2216	30.4891	45.6859	40.1668	32.7452	12.195	20.8275	9.01298
ENSG00000265763	ENSG00000265763	zinc finger protein 488 [Source:HGNC Symbol;Acc:HGNC:23535]	ZNF488	96.2312	41.445	2.09783	2.73361e-07	138.976	41.445	2.94087	9.8461e-15	Y	Y	133.102	148.802	135.023	82.6697	104.981	101.042	41.0195	36.4481	46.8675
ENSG00000198155	ENSG00000198155	zinc finger protein 876, pseudogene [Source:HGNC Symbol;Acc:HGNC:32472]	ZNF876P	163.825	73.4826	2.09418	2.72196e-10	190.601	73.4826	2.41717	1.8263e-14	Y	Y	205.91	182.087	183.806	177.305	157.929	156.242	75.3871	66.648	78.4129
ENSG00000267278	ENSG00000267278	MAP3K14 antisense RNA 1 [Source:HGNC Symbol;Acc:HGNC:44359]	MAP3K14-AS1	32.0525	10.5403	2.09072	0.00101629	30.5753	10.5403	2.02994	0.00177669	Y	Y	29.5782	26.4319	35.7158	43.5104	27.3865	25.2606	8.86907	8.33099	14.4208
ENSG00000196263	ENSG00000196263	zinc finger protein 471 [Source:HGNC Symbol;Acc:HGNC:23226]	ZNF471	181.447	81.3483	2.08871	7.39142e-10	188.345	81.3483	2.16671	8.85898e-11	Y	Y	189.983	170.339	204.713	188.182	162.493	193.665	69.8439	82.2686	91.9324
ENSG00000251127	ENSG00000251127	novel transcript		52.9155	21.4264	2.08851	4.71973e-05	60.5242	21.4264	2.34759	1.84445e-06	Y	Y	63.707	57.7587	60.1071	54.388	54.7729	49.5856	26.6072	18.7447	18.9273
ENSG00000130751	ENSG00000130751	neuronal PAS domain protein 1 [Source:HGNC Symbol;Acc:HGNC:7894]	NPAS1	25.0619	8.16109	2.08587	0.00107861	29.7761	8.16109	2.37916	0.000116083	Y	Y	29.5782	28.3899	31.3602	20.6674	27.3865	27.1318	7.76044	10.4137	6.30908
ENSG00000116771	ENSG00000116771	agmatinase [Source:HGNC Symbol;Acc:HGNC:18407]	AGMAT	15.9513	3.42085	2.0853	0.00107966	41.9025	3.42085	4.30998	4.94205e-09	Y	Y	47.7802	35.2426	42.6847	22.843	10.0417	14.9693	4.43454	3.12412	2.70389
ENSG00000172602	ENSG00000172602	Rho family GTPase 1 [Source:HGNC Symbol;Acc:HGNC:18314]	RND1	60.7683	23.6022	2.08422	0.000157953	63.2465	23.6022	2.15903	7.35672e-05	Y	Y	76.2208	49.927	63.5916	82.6697	56.5987	43.0366	23.2813	24.993	22.5324
ENSG00000160606	ENSG00000160606	TLC domain containing 1 [Source:HGNC Symbol;Acc:HGNC:25177]	TLCD1	465.221	218.195	2.08205	1.00366e-21	457.317	218.195	2.04599	1.26369e-20	Y	Y	455.05	463.048	453.852	441.63	461.918	492.114	209.532	219.73	225.324
ENSG00000183242	ENSG00000183242	WT1 antisense RNA [Source:HGNC Symbol;Acc:HGNC:18135]	WT1-AS	121.191	53.2134	2.08103	1.8327e-07	118.899	53.2134	2.05508	3.28473e-07	Y	Y	96.6981	130.202	129.796	130.531	109.546	123.496	49.8885	52.0687	57.683
ENSG00000118402	ENSG00000118402	ELOVL fatty acid elongase 4 [Source:HGNC Symbol;Acc:HGNC:14415]	ELOVL4	66.5671	28.0835	2.07784	0.000400526	3.69323	28.0835	-3.13755	2.56113e-07	Y		4.5505	3.91584	2.61335	68.5289	67.5533	63.6193	36.5849	26.0344	21.6311
ENSG00000204991	ENSG00000204991	spire type actin nucleation factor 2 [Source:HGNC Symbol;Acc:HGNC:30623]	SPIRE2	320.684	148.968	2.07606	2.31447e-14	373.644	148.968	2.40944	1.1308e-20	Y	Y	331.049	409.206	380.678	324.152	307.641	330.259	145.231	165.579	136.096
ENSG00000278962	ENSG00000278962	TEC		80.9565	30.0763	2.07594	0.000307797	121.711	30.0763	2.88603	8.67312e-08	Y	Y	168.368	101.812	94.9518	128.356	60.2502	54.2635	28.8245	34.3654	27.0389
ENSG00000165124	ENSG00000165124	sushi, von Willebrand factor type A, EGF and pentraxin domain containing 1 [Source:HGNC Symbol;Acc:HGNC:15985]	SVEP1	23.0841	6.75017	2.06899	0.00203627	23.9476	6.75017	2.11784	0.00154855	Y	Y	32.9911	20.5582	18.2935	30.4573	20.0834	18.7116	6.6518	7.28962	6.30908
ENSG00000180089	ENSG00000180089	transmembrane protein 86B [Source:HGNC Symbol;Acc:HGNC:28448]	TMEM86B	132.85	57.6642	2.06606	2.41265e-06	131.526	57.6642	2.05445	3.14039e-06	Y	Y	106.937	143.907	143.734	141.409	118.675	138.466	64.3008	37.4895	71.2025
ENSG00000123700	ENSG00000123700	potassium voltage-gated channel subfamily J member 2 [Source:HGNC Symbol;Acc:HGNC:6263]	KCNJ2	11.4178	1.24842	2.06579	0.00188497	24.3355	1.24842	3.36882	9.17319e-06	Y	Y	17.0644	25.453	30.4891	6.52656	13.6932	14.0337	0	1.04137	2.70389
ENSG00000162745	ENSG00000162745	olfactomedin like 2B [Source:HGNC Symbol;Acc:HGNC:24558]	OLFML2B	497.011	233.236	2.0641	3.72004e-15	658.937	233.236	2.71161	1.86889e-28	Y	Y	623.418	708.768	644.627	542.792	506.649	441.593	266.072	235.351	198.285
ENSG00000171174	ENSG00000171174	ribokinase [Source:HGNC Symbol;Acc:HGNC:30325]	RBKS	672.472	309.935	2.05962	2.1978e-10	745.612	309.935	2.27053	3.66759e-13	Y	Y	861.182	665.693	709.96	861.506	620.76	535.151	328.156	305.123	296.527
ENSG00000258472	ENSG00000258472	novel protein		49.3244	19.4871	2.05814	0.0002285	49.6872	19.4871	2.06466	0.000226312	Y	Y	56.8812	46.0112	46.1692	47.8614	37.4282	62.6837	18.8468	19.7861	19.8285
ENSG00000139329	ENSG00000139329	lumican [Source:HGNC Symbol;Acc:HGNC:6724]	LUM	57.2892	23.1894	2.05784	0.0010726	4.76588	23.1894	-2.44298	4.61735e-05	Y		3.41287	3.91584	6.96894	60.9145	52.9472	58.0058	14.4122	28.1171	27.0389
ENSG00000105696	ENSG00000105696	transmembrane protein 59 like [Source:HGNC Symbol;Acc:HGNC:13237]	TMEM59L	30.07	10.1001	2.04934	0.000666346	68.4945	10.1001	3.99923	4.63853e-11	Y	Y	83.0466	59.7166	62.7204	35.8961	35.6024	18.7116	12.195	7.28962	10.8156
ENSG00000265666	ENSG00000265666	RARA antisense RNA 1 [Source:HGNC Symbol;Acc:HGNC:49577]	RARA-AS1	53.2578	20.7828	2.04892	0.00032557	68.1343	20.7828	2.51354	2.65807e-06	Y	Y	80.7713	62.6535	60.9782	67.4411	49.2956	43.0366	25.4986	26.0344	10.8156
ENSG00000223511	ENSG00000223511	novel transcript		53.126	21.8927	2.04706	0.000878098	6.99031	21.8927	-2.03224	0.00114399	Y		6.82575	9.78961	4.35559	58.739	53.86	46.7789	19.9554	24.993	20.7298
ENSG00000135919	ENSG00000135919	serpin family E member 2 [Source:HGNC Symbol;Acc:HGNC:8951]	SERPINE2	2233.08	1064.94	2.04684	5.4143e-19	2180.83	1064.94	2.00118	8.42313e-18	Y	Y	2210.4	2135.11	2196.96	2608.45	2202.78	1888	1152.98	1068.45	973.401
ENSG00000278872	ENSG00000278872	novel transcript		62.4212	25.4273	2.042	0.000153529	70.0443	25.4273	2.2543	1.34047e-05	Y	Y	50.0555	93.0013	67.076	52.2125	62.076	72.9751	24.3899	23.9516	27.9402
ENSG00000074527	ENSG00000074527	netrin 4 [Source:HGNC Symbol;Acc:HGNC:13658]	NTN4	575.225	273.97	2.04037	2.95271e-16	734.981	273.97	2.58612	1.19356e-28	Y	Y	803.163	673.525	728.254	624.374	597.025	504.277	296.005	278.047	247.857
ENSG00000148344	ENSG00000148344	prostaglandin E synthase [Source:HGNC Symbol;Acc:HGNC:9599]	PTGES	80.1281	30.9059	2.03978	0.000634889	80.7758	30.9059	2.05037	0.00060678	Y	Y	92.1476	82.2327	67.9471	89.1963	90.3753	60.8126	45.454	36.4481	10.8156
ENSG00000260862	ENSG00000260862	uncharacterized LOC101928446 [Source:NCBI gene;Acc:101928446]		31.7761	11.6956	2.03796	0.000892522	33.5074	11.6956	2.1259	0.000436591	Y	Y	31.8535	38.1795	30.4891	31.545	31.038	32.7452	12.195	9.37237	13.5195
ENSG00000109063	ENSG00000109063	myosin heavy chain 3 [Source:HGNC Symbol;Acc:HGNC:7573]	MYH3	30.0872	10.6785	2.0325	0.000889459	47.9637	10.6785	2.95797	2.68246e-07	Y	Y	45.505	46.9901	51.3959	21.7552	29.2122	39.2943	11.0863	8.33099	12.6182
ENSG00000239697	ENSG00000239697	TNF superfamily member 12 [Source:HGNC Symbol;Acc:HGNC:11927]	TNFSF12	213.072	97.8207	2.03021	6.63255e-08	260.091	97.8207	2.44334	3.60706e-12	Y	Y	279.856	240.824	259.593	236.044	228.22	174.953	84.2562	128.089	81.1168
ENSG00000162894	ENSG00000162894	Fc fragment of IgM receptor [Source:HGNC Symbol;Acc:HGNC:14315]	FCMR	180.894	84.5558	2.02587	2.44289e-09	197.001	84.5558	2.19988	1.71481e-11	Y	Y	192.259	211.456	187.29	203.411	164.319	174.953	96.4511	83.3099	73.9064
ENSG00000226752	ENSG00000226752	cutA divalent cation tolerance homolog-like, pseudogene [Source:HGNC Symbol;Acc:HGNC:27367]	CUTALP	252.3	119.567	2.02257	2.05633e-12	351.014	119.567	2.78213	5.09837e-26	Y	Y	348.113	325.994	378.936	258.887	251.955	246.057	104.212	136.42	118.07
ENSG00000148082	ENSG00000148082	SHC adaptor protein 3 [Source:HGNC Symbol;Acc:HGNC:18181]	SHC3	980.341	472.5	2.02126	1.81617e-17	1057.05	472.5	2.17456	3.7293e-21	Y	Y	1141.04	1047.49	982.62	1126.92	977.697	836.407	472.278	487.363	457.859
ENSG00000115339	ENSG00000115339	polypeptide N-acetylgalactosaminyltransferase 3 [Source:HGNC Symbol;Acc:HGNC:4125]	GALNT3	1134.95	525.691	2.02037	4.84993e-08	2250.1	525.691	3.79787	5.13247e-27	Y	Y	2622.22	1975.54	2152.53	1456.51	1147.49	800.855	618.618	532.142	426.314
ENSG00000041353	ENSG00000041353	RAB27B, member RAS oncogene family [Source:HGNC Symbol;Acc:HGNC:9767]	RAB27B	299.016	141.151	2.01976	2.96911e-11	621.556	141.151	4.07208	2.65124e-44	Y	Y	583.601	629.472	651.596	332.854	299.425	264.769	166.295	109.344	147.813
ENSG00000263812	ENSG00000263812	long intergenic non-protein coding RNA 908 [Source:HGNC Symbol;Acc:HGNC:27599]	LINC00908	9.19171	0.369545	2.01869	0.00218897	11.1395	0.369545	2.24191	0.00106835	Y	Y	10.2386	12.7265	10.4534	11.9654	11.8675	3.74231	1.10863	0	0
ENSG00000164683	ENSG00000164683	hes related family bHLH transcription factor with YRPW motif 1 [Source:HGNC Symbol;Acc:HGNC:4880]	HEY1	180.829	83.4179	2.01046	3.42507e-07	235.028	83.4179	2.56474	1.68673e-12	Y	Y	252.553	217.329	235.202	221.903	163.406	157.177	107.537	76.0203	66.696
ENSG00000124126	ENSG00000124126	phosphatidylinositol-3,4,5-trisphosphate dependent Rac exchange factor 1 [Source:HGNC Symbol;Acc:HGNC:32594]	PREX1	50.9431	19.0248	2.00849	0.00748733	3.11249	19.0248	-2.22681	0.000292197	Y		4.5505	3.91584	0.871117	71.7921	52.0343	29.0029	24.3899	21.8689	10.8156
ENSG00000203930	ENSG00000203930	long intergenic non-protein coding RNA 632 [Source:HGNC Symbol;Acc:HGNC:27865]	LINC00632	38.541	15.0753	2.00835	0.000553545	49.8787	15.0753	2.4983	3.89665e-06	Y	Y	50.0555	49.927	49.6537	43.5104	34.6895	37.4231	9.9777	20.8275	14.4208
ENSG00000153064	ENSG00000153064	B cell scaffold protein with ankyrin repeats 1 [Source:HGNC Symbol;Acc:HGNC:18233]	BANK1	11.8388	2.05848	2.00521	0.00118618	76.4794	2.05848	8.8742	3.03149e-14	Y	Y	68.2575	79.2958	81.885	15.2286	11.8675	8.4202	1.10863	4.1655	0.901298
ENSG00000047315	ENSG00000047315	RNA polymerase II subunit B [Source:HGNC Symbol;Acc:HGNC:9188]	POLR2B	5096.31	10268.2	-2.00149	3.50122e-58	4636.61	10268.2	-2.19776	1.36614e-74	Y	Y	4462.9	4789.08	4657.86	4936.25	5173.3	5179.36	10108.5	10013.9	10682.2
ENSG00000064042	ENSG00000064042	LIM and calponin homology domains 1 [Source:HGNC Symbol;Acc:HGNC:29191]	LIMCH1	640.563	1310.78	-2.00828	1.43967e-21	597.979	1310.78	-2.14994	1.28331e-25	Y	Y	670.061	586.398	537.479	674.411	633.54	613.739	1375.81	1356.91	1199.63
ENSG00000138759	ENSG00000138759	Fraser extracellular matrix complex subunit 1 [Source:HGNC Symbol;Acc:HGNC:19185]	FRAS1	0	8.64615	-2.00901	0.00132862	0	8.64615	-2.00611	0.0014806	Y	Y	0	0	0	0	0	0	6.6518	9.37237	9.91427
ENSG00000166035	ENSG00000166035	lipase C, hepatic type [Source:HGNC Symbol;Acc:HGNC:6619]	LIPC	43.465	100.236	-2.01287	0.000230798	25.8125	100.236	-3.00169	4.20428e-09	Y	Y	36.404	16.6423	24.3913	55.4757	34.6895	40.2299	108.646	114.551	77.5116
ENSG00000133315	ENSG00000133315	MACRO domain containing 1 [Source:HGNC Symbol;Acc:HGNC:29598]	MACROD1	394.047	824.309	-2.01593	1.01937e-11	305.55	824.309	-2.56105	4.15701e-20	Y	Y	337.874	279.983	298.793	457.947	411.71	312.483	846.996	911.203	714.729
ENSG00000111799	ENSG00000111799	collagen type XII alpha 1 chain [Source:HGNC Symbol;Acc:HGNC:2188]	COL12A1	2938.79	6145.19	-2.01813	1.22018e-12	2536.82	6145.19	-2.32128	8.17774e-18	Y	Y	2459.54	2554.11	2596.8	2318.02	3055.42	3442.93	5027.65	6380.5	7027.42
ENSG00000158104	ENSG00000158104	4-hydroxyphenylpyruvate dioxygenase [Source:HGNC Symbol;Acc:HGNC:5147]	HPD	7.89571	25.1959	-2.01813	0.0105755	2.95175	25.1959	-2.93315	3.2692e-05	Y	Y	3.41287	1.95792	3.48447	3.26328	6.39017	14.0337	25.4986	23.9516	26.1376
ENSG00000011201	ENSG00000011201	anosmin 1 [Source:HGNC Symbol;Acc:HGNC:6211]	ANOS1	0.362587	9.27129	-2.02333	0.00611312	0	9.27129	-2.10741	0.000787083	Y	Y	0	0	0	1.08776	0	0	5.54317	11.4551	10.8156
ENSG00000174672	ENSG00000174672	BR serine/threonine kinase 2 [Source:HGNC Symbol;Acc:HGNC:11405]	BRSK2	16.7983	43.2983	-2.03356	0.00163798	14.9313	43.2983	-2.16399	0.000608252	Y	Y	11.3762	10.7686	22.649	21.7552	14.6061	14.0337	39.9108	45.8205	44.1636
ENSG00000039068	ENSG00000039068	cadherin 1 [Source:HGNC Symbol;Acc:HGNC:1748]	CDH1	6.77776	23.8062	-2.03706	0.00748433	6.13407	23.8062	-2.14131	0.00386689	Y	Y	10.2386	2.93688	5.2267	6.52656	9.12882	4.67789	34.3676	20.8275	16.2234
ENSG00000129354	ENSG00000129354	adaptor related protein complex 1 subunit mu 2 [Source:HGNC Symbol;Acc:HGNC:558]	AP1M2	388.926	819.835	-2.03948	1.69713e-14	391.592	819.835	-2.03137	2.67804e-14	Y	Y	423.196	385.711	365.869	326.328	364.24	476.209	844.779	827.893	786.833
ENSG00000152611	ENSG00000152611	calcyphosine like [Source:HGNC Symbol;Acc:HGNC:28375]	CAPSL	1.91432	12.4123	-2.05011	0.0100058	1.55971	12.4123	-2.11952	0.00688094	Y	Y	0	2.93688	1.74223	1.08776	0.912882	3.74231	13.3036	10.4137	13.5195
ENSG00000109220	ENSG00000109220	cysteine rich hydrophobic domain 2 [Source:HGNC Symbol;Acc:HGNC:1935]	CHIC2	251.943	531.103	-2.05038	3.3926e-17	210.288	531.103	-2.44528	2.13103e-25	Y	Y	222.974	215.371	192.517	236.044	279.342	240.444	569.838	519.646	503.825
ENSG00000163743	ENSG00000163743	ring finger and CHY zinc finger domain containing 1 [Source:HGNC Symbol;Acc:HGNC:17479]	RCHY1	901.205	1885.16	-2.05403	2.32849e-23	860.529	1885.16	-2.14579	4.61546e-26	Y	Y	832.741	842.885	905.962	983.335	875.454	844.827	1975.59	1647.45	2032.43
ENSG00000142303	ENSG00000142303	ADAM metallopeptidase with thrombospondin type 1 motif 10 [Source:HGNC Symbol;Acc:HGNC:13201]	ADAMTS10	104.599	233.47	-2.06254	1.98333e-06	14.9506	233.47	-9.54278	2.46662e-38	Y	Y	20.4772	15.6634	8.71117	95.7228	109.546	108.527	245.008	283.254	172.148
ENSG00000120051	ENSG00000120051	cilia and flagella associated protein 58 [Source:HGNC Symbol;Acc:HGNC:26676]	CFAP58	69.8	154.89	-2.06448	1.79844e-07	57.2369	154.89	-2.45145	1.2843e-10	Y	Y	56.8812	46.0112	68.8183	65.2656	73.0306	71.1039	166.295	134.337	164.036
ENSG00000130038	ENSG00000130038	calcium release activated channel regulator 2A [Source:HGNC Symbol;Acc:HGNC:28657]	CRACR2A	235.009	503.018	-2.06668	5.23266e-14	196.242	503.018	-2.44785	2.33493e-20	Y	Y	169.506	207.54	211.681	200.148	239.175	265.704	463.409	510.273	535.371
ENSG00000126882	ENSG00000126882	family with sequence similarity 78 member A [Source:HGNC Symbol;Acc:HGNC:25465]	FAM78A	31.4642	75.1827	-2.06798	0.0001101	25.5668	75.1827	-2.4013	2.93141e-06	Y	Y	19.3396	22.5161	34.8447	31.545	31.038	31.8097	62.0835	89.5582	73.9064
ENSG00000160886	ENSG00000160886	lymphocyte antigen 6 family member K [Source:HGNC Symbol;Acc:HGNC:24225]	LY6K	28.721	69.6751	-2.08146	0.000126884	23.8149	69.6751	-2.40785	4.05143e-06	Y	Y	23.8901	28.3899	19.1646	27.194	36.5153	22.4539	58.7576	71.8548	78.4129
ENSG00000198692	ENSG00000198692	eukaryotic translation initiation factor 1A Y-linked [Source:HGNC Symbol;Acc:HGNC:3252]	EIF1AY	442.476	945.254	-2.08252	1.20913e-15	2.57255	945.254	-69.1986	1.70226e-56	Y	Y	2.27525	1.95792	3.48447	439.455	484.74	403.234	1048.77	815.396	971.599
ENSG00000103522	ENSG00000103522	interleukin 21 receptor [Source:HGNC Symbol;Acc:HGNC:6006]	IL21R	7.37878	28.9286	-2.1006	0.00813457	2.58949	28.9286	-2.89528	3.68214e-05	Y	Y	3.41287	0	4.35559	6.52656	11.8675	3.74231	19.9554	47.9032	18.9273
ENSG00000132467	ENSG00000132467	UTP3, small subunit processome component [Source:HGNC Symbol;Acc:HGNC:24477]	UTP3	1074.25	2307.25	-2.10609	6.52107e-26	1015.29	2307.25	-2.2246	1.33356e-29	Y	Y	932.852	1017.14	1095.87	945.263	1079.94	1197.54	2297.09	2211.88	2412.77
ENSG00000133110	ENSG00000133110	periostin [Source:HGNC Symbol;Acc:HGNC:16953]	POSTN	46.3351	120.441	-2.11308	0.000398189	24.2511	120.441	-3.34725	2.96806e-09	Y	Y	21.6149	37.2005	13.9379	25.0185	43.8183	70.1684	109.755	128.089	123.478
ENSG00000078596	ENSG00000078596	integral membrane protein 2A [Source:HGNC Symbol;Acc:HGNC:6173]	ITM2A	1.84846	14.3098	-2.1149	0.00809245	0.652641	14.3098	-2.39568	0.00199048	Y	Y	0	1.95792	0	0	2.73865	2.80673	7.76044	13.5379	21.6311
ENSG00000163312	ENSG00000163312	helicase, POLQ like [Source:HGNC Symbol;Acc:HGNC:18536]	HELQ	238.328	518.008	-2.11499	4.43635e-19	242.398	518.008	-2.08198	2.84789e-18	Y	Y	235.488	240.824	250.882	218.64	243.739	252.606	526.601	468.618	558.805
ENSG00000157570	ENSG00000157570	tetraspanin 18 [Source:HGNC Symbol;Acc:HGNC:20660]	TSPAN18	749.259	1613.49	-2.11614	2.05232e-26	515.914	1613.49	-3.04437	1.59177e-55	Y	Y	576.776	511.018	459.95	820.171	718.438	709.168	1554.3	1615.17	1671.01
ENSG00000183508	ENSG00000183508	terminal nucleotidyltransferase 5C [Source:HGNC Symbol;Acc:HGNC:24712]	TENT5C	30.4553	76.8872	-2.12146	0.000158149	23.1484	76.8872	-2.61597	1.07561e-06	Y	Y	32.9911	22.5161	13.9379	36.9838	32.8638	21.5183	78.713	84.3513	67.5973
ENSG00000138663	ENSG00000138663	COP9 signalosome subunit 4 [Source:HGNC Symbol;Acc:HGNC:16702]	COPS4	1203.8	2583.49	-2.12179	1.08584e-42	1264.76	2583.49	-2.0202	1.9605e-37	Y	Y	1254.8	1251.11	1288.38	1240.05	1180.36	1190.99	2773.8	2389.95	2586.72
ENSG00000168899	ENSG00000168899	vesicle associated membrane protein 5 [Source:HGNC Symbol;Acc:HGNC:12646]	VAMP5	327.968	712.441	-2.13221	1.29372e-22	44.7654	712.441	-13.4042	9.64175e-136	Y	Y	50.0555	37.2005	47.0403	339.381	342.331	302.192	713.96	718.548	704.815
ENSG00000171885	ENSG00000171885	aquaporin 4 [Source:HGNC Symbol;Acc:HGNC:637]	AQP4	1.03703	11.7669	-2.13966	0.00684628	0.290372	11.7669	-2.31773	0.00179107	Y	Y	0	0	0.871117	2.17552	0	0.935578	14.4122	14.5792	6.30908
ENSG00000126860	ENSG00000126860	ecotropic viral integration site 2A [Source:HGNC Symbol;Acc:HGNC:3499]	EVI2A	53.9906	137.398	-2.14639	0.00012195	24.9504	137.398	-3.77222	7.32821e-12	Y	Y	29.5782	23.4951	21.7779	76.1432	47.4699	38.3587	200.663	105.179	106.353
ENSG00000120915	ENSG00000120915	epoxide hydrolase 2 [Source:HGNC Symbol;Acc:HGNC:3402]	EPHX2	9.39685	29.6806	-2.14959	0.00298515	4.99644	29.6806	-2.86413	2.61239e-05	Y	Y	6.82575	2.93688	5.2267	15.2286	5.47729	7.48463	31.0417	29.1585	28.8415
ENSG00000172350	ENSG00000172350	ATP binding cassette subfamily G member 4 [Source:HGNC Symbol;Acc:HGNC:13884]	ABCG4	3.82107	17.0834	-2.15635	0.00510529	3.31402	17.0834	-2.26735	0.00266967	Y	Y	3.41287	3.91584	2.61335	2.17552	2.73865	6.54905	15.5209	17.7034	18.026
ENSG00000236824	ENSG00000236824	brain cytoplasmic RNA 1 [Source:HGNC Symbol;Acc:HGNC:1022]	BCYRN1	9.65568	30.7407	-2.16426	0.00155965	9.8771	30.7407	-2.12271	0.00230564	Y	Y	5.68812	11.7475	12.1956	8.70208	12.7803	7.48463	36.5849	24.993	30.6441
ENSG00000182378	ENSG00000182378	phosphatidylinositol specific phospholipase C X domain containing 1 [Source:HGNC Symbol;Acc:HGNC:23148]	PLCXD1	255.477	566.612	-2.16599	4.70953e-21	276.967	566.612	-2.00029	3.26022e-17	Y	Y	285.544	269.214	276.144	292.607	246.478	227.345	550.991	587.335	561.508
ENSG00000134851	ENSG00000134851	transmembrane protein 165 [Source:HGNC Symbol;Acc:HGNC:30760]	TMEM165	2989.9	6569.88	-2.16859	3.05502e-42	3104.06	6569.88	-2.09045	2.25768e-38	Y	Y	3026.08	3061.21	3224.88	2759.65	3286.38	2923.68	6816.99	6228.46	6664.19
ENSG00000166448	ENSG00000166448	transmembrane protein 130 [Source:HGNC Symbol;Acc:HGNC:25429]	TMEM130	28.3177	74.3724	-2.1749	0.000181995	15.7477	74.3724	-3.26555	8.1494e-09	Y	Y	22.7525	8.81065	15.6801	36.9838	27.3865	20.5827	57.649	84.3513	81.1168
ENSG00000139629	ENSG00000139629	polypeptide N-acetylgalactosaminyltransferase 6 [Source:HGNC Symbol;Acc:HGNC:4128]	GALNT6	156.472	354.968	-2.17817	9.02484e-14	105.954	354.968	-3.12907	1.05993e-26	Y	Y	117.175	97.8961	102.792	172.954	155.19	141.272	352.546	397.805	314.553
ENSG00000133943	ENSG00000133943	D-glutamate cyclase [Source:HGNC Symbol;Acc:HGNC:20498]	DGLUCY	1088.92	2402.62	-2.1835	6.60248e-53	1083.24	2402.62	-2.19405	1.94631e-53	Y	Y	1062.54	1105.25	1081.93	1094.29	1050.73	1121.76	2410.17	2506.59	2291.1
ENSG00000138771	ENSG00000138771	shroom family member 3 [Source:HGNC Symbol;Acc:HGNC:30422]	SHROOM3	1690.82	3803.46	-2.18918	1.81691e-21	1552.83	3803.46	-2.37633	5.92784e-26	Y	Y	1658.66	1499.77	1500.06	1915.54	1794.73	1362.2	3802.61	4066.57	3541.2
ENSG00000086570	ENSG00000086570	FAT atypical cadherin 2 [Source:HGNC Symbol;Acc:HGNC:3596]	FAT2	18.7913	51.2044	-2.18991	0.000170273	16.7336	51.2044	-2.37365	3.36657e-05	Y	Y	18.202	13.7055	18.2935	18.4919	19.1705	18.7116	56.5403	58.317	38.7558
ENSG00000184838	ENSG00000184838	proline rich 16 [Source:HGNC Symbol;Acc:HGNC:29654]	PRR16	1.96505	13.7058	-2.194	0.00718605	0	13.7058	-2.76133	3.39384e-05	Y	Y	0	0	0	2.17552	0.912882	2.80673	18.8468	11.4551	10.8156
ENSG00000184986	ENSG00000184986	transmembrane protein 121 [Source:HGNC Symbol;Acc:HGNC:20511]	TMEM121	59.2188	142.958	-2.19744	1.86836e-07	62.9913	142.958	-2.08397	1.31197e-06	Y	Y	73.9456	63.6325	51.3959	75.0554	50.2085	52.3924	144.122	160.372	124.379
ENSG00000169067	ENSG00000169067	actin, beta like 2 [Source:HGNC Symbol;Acc:HGNC:17780]	ACTBL2	104.994	248.43	-2.20188	1.01381e-09	110.04	248.43	-2.11576	7.45854e-09	Y	Y	101.249	116.496	112.374	79.4065	120.5	115.076	215.075	236.392	293.823
ENSG00000187185	ENSG00000187185	uncharacterized LOC388282 [Source:NCBI gene;Acc:388282]		14.1663	42.2802	-2.21198	0.000623499	9.52691	42.2802	-2.80048	7.07842e-06	Y	Y	9.10099	10.7686	8.71117	11.9654	13.6932	16.8404	50.9972	47.9032	27.9402
ENSG00000167680	ENSG00000167680	semaphorin 6B [Source:HGNC Symbol;Acc:HGNC:10739]	SEMA6B	271.723	626.608	-2.22369	6.47551e-17	170.846	626.608	-3.4464	3.85144e-37	Y	Y	182.02	169.36	161.157	287.169	287.558	240.444	615.292	723.755	540.779
ENSG00000249378	ENSG00000249378	long intergenic non-protein coding RNA 1060 [Source:HGNC Symbol;Acc:HGNC:49081]	LINC01060	0.666881	10.8877	-2.2264	0.00638411	0	10.8877	-2.41934	0.000193948	Y	Y	0	0	0	1.08776	0.912882	0	12.195	11.4551	9.01298
ENSG00000225383	ENSG00000225383	surfactant associated 1, pseudogene [Source:HGNC Symbol;Acc:HGNC:18383]	SFTA1P	352.042	823.574	-2.23174	4.01224e-14	216.908	823.574	-3.52226	2.21693e-32	Y	Y	278.718	166.423	205.584	317.626	400.755	337.744	851.431	821.644	797.648
ENSG00000138646	ENSG00000138646	HECT and RLD domain containing E3 ubiquitin protein ligase 5 [Source:HGNC Symbol;Acc:HGNC:24368]	HERC5	542.122	1231.22	-2.23533	3.31778e-33	87.7475	1231.22	-12.6174	2.88483e-199	Y	Y	92.1476	74.401	96.694	551.494	568.725	506.148	1242.78	1207.99	1242.89
ENSG00000110455	ENSG00000110455	1-aminocyclopropane-1-carboxylate synthase homolog (inactive) [Source:HGNC Symbol;Acc:HGNC:23989]	ACCS	140.183	326.353	-2.24773	6.68131e-18	140.021	326.353	-2.24702	8.69349e-18	Y	Y	142.203	126.286	151.574	141.409	136.932	142.208	322.612	323.867	332.579
ENSG00000160190	ENSG00000160190	solute carrier family 37 member 1 [Source:HGNC Symbol;Acc:HGNC:11024]	SLC37A1	138.872	346.611	-2.24841	1.98324e-07	73.1611	346.611	-3.90487	9.28328e-19	Y	Y	114.9	55.8008	48.7826	152.286	130.542	133.788	315.961	403.012	320.862
ENSG00000244675	ENSG00000244675	novel transcript, sense overlapping to ATP13A3		13.1877	39.0191	-2.25853	0.000292297	11.1036	39.0191	-2.49357	4.82774e-05	Y	Y	10.2386	11.7475	11.3245	17.4042	11.8675	10.2914	39.9108	37.4895	39.6571
ENSG00000079337	ENSG00000079337	Rap guanine nucleotide exchange factor 3 [Source:HGNC Symbol;Acc:HGNC:16629]	RAPGEF3	603.204	1431.9	-2.26193	1.03893e-14	458.185	1431.9	-2.93161	1.02469e-24	Y	Y	464.151	530.597	379.807	537.353	569.638	702.619	1624.15	1501.66	1169.88
ENSG00000105894	ENSG00000105894	pleiotrophin [Source:HGNC Symbol;Acc:HGNC:9630]	PTN	41.5106	104.831	-2.26451	5.05506e-10	423.135	104.831	3.76543	7.58316e-34	Y		406.132	411.164	452.11	48.9492	45.6441	29.9385	115.298	107.262	91.9324
ENSG00000248866	ENSG00000248866	USP46 antisense RNA 1 [Source:HGNC Symbol;Acc:HGNC:43991]	USP46-AS1	32.5519	84.3015	-2.26625	9.54456e-07	36.6126	84.3015	-2.05313	1.80601e-05	Y	Y	30.7159	38.1795	40.9425	28.2817	31.9509	37.4231	89.7993	80.1858	82.9194
ENSG00000132357	ENSG00000132357	caspase recruitment domain family member 6 [Source:HGNC Symbol;Acc:HGNC:16394]	CARD6	114.903	276.82	-2.27172	2.78493e-13	131.65	276.82	-2.00944	5.70565e-10	Y	Y	133.102	131.181	130.668	96.8106	114.11	133.788	296.005	294.709	239.745
ENSG00000113721	ENSG00000113721	platelet derived growth factor receptor beta [Source:HGNC Symbol;Acc:HGNC:8804]	PDGFRB	29.3599	79.6872	-2.27274	1.0499e-05	29.9776	79.6872	-2.23479	1.71642e-05	Y	Y	28.4406	28.3899	33.1025	27.194	34.6895	26.1962	86.4734	95.8064	56.7818
ENSG00000184178	ENSG00000184178	sec1 family domain containing 2 [Source:HGNC Symbol;Acc:HGNC:30676]	SCFD2	339.068	799.492	-2.28051	2.80281e-21	303.405	799.492	-2.53756	1.53881e-26	Y	Y	277.58	318.162	314.473	279.554	359.675	377.974	761.631	777.907	858.937
ENSG00000269220	ENSG00000269220	long intergenic non-protein coding RNA 528 [Source:HGNC Symbol;Acc:HGNC:26875]	LINC00528	8.13421	30.1509	-2.28724	0.00152671	4.48759	30.1509	-2.968	1.81985e-05	Y	Y	6.82575	4.8948	1.74223	8.70208	8.21594	7.48463	23.2813	43.7377	23.4337
ENSG00000136378	ENSG00000136378	ADAM metallopeptidase with thrombospondin type 1 motif 7 [Source:HGNC Symbol;Acc:HGNC:223]	ADAMTS7	0.674446	11.1676	-2.29913	0.00417498	0.995901	11.1676	-2.20381	0.00616645	Y	Y	1.13762	0.978961	0.871117	1.08776	0	0.935578	8.86907	15.6206	9.01298
ENSG00000164929	ENSG00000164929	BAALC, MAP3K1 and KLF4 binding [Source:HGNC Symbol;Acc:HGNC:14333]	BAALC	22.6329	65.5058	-2.32181	1.56224e-06	155.274	65.5058	2.15209	3.29348e-06	Y		176.332	144.886	144.605	28.2817	24.6478	14.9693	85.3648	62.4825	48.6701
ENSG00000198930	ENSG00000198930	chondrosarcoma associated gene 1 [Source:HGNC Symbol;Acc:HGNC:24294]	CSAG1	34.9454	92.771	-2.32634	7.59806e-06	1.66548	92.771	-10.4185	1.21509e-15	Y	Y	2.27525	0.978961	1.74223	32.6328	31.038	41.1654	95.3425	107.262	75.709
ENSG00000236017	ENSG00000236017	ASMTL antisense RNA 1 [Source:HGNC Symbol;Acc:HGNC:25811]	ASMTL-AS1	59.3071	163.862	-2.34105	4.38449e-06	35.8473	163.862	-3.44362	1.42888e-11	Y	Y	32.9911	36.2216	38.3292	56.5635	48.3827	72.9751	118.624	126.006	246.956
ENSG00000258955	ENSG00000258955	long intergenic non-protein coding RNA 519 [Source:HGNC Symbol;Acc:HGNC:19838]	LINC00519	17.2903	51.6409	-2.34479	5.69456e-05	14.1013	51.6409	-2.70132	2.6856e-06	Y	Y	19.3396	10.7686	12.1956	19.5797	18.2576	14.0337	57.649	53.1101	44.1636
ENSG00000196502	ENSG00000196502	sulfotransferase family 1A member 1 [Source:HGNC Symbol;Acc:HGNC:11453]	SULT1A1	10.5557	38.7008	-2.35045	0.00100998	3.4198	38.7008	-3.73097	2.14032e-07	Y	Y	5.68812	1.95792	2.61335	14.1409	10.0417	7.48463	44.3454	51.0273	20.7298
ENSG00000067646	ENSG00000067646	zinc finger protein Y-linked [Source:HGNC Symbol;Acc:HGNC:12870]	ZFY	148.262	363.691	-2.35158	2.88216e-14	0.871117	363.691	-36.188	3.12515e-22	Y	Y	0	0	2.61335	125.092	161.58	158.113	334.807	362.398	393.867
ENSG00000169744	ENSG00000169744	LIM domain binding 2 [Source:HGNC Symbol;Acc:HGNC:6533]	LDB2	2.19592	16.5479	-2.35484	0.00304996	0.290372	16.5479	-2.90771	0.000230379	Y	Y	0	0	0.871117	1.08776	4.56441	0.935578	21.064	11.4551	17.1247
ENSG00000167994	ENSG00000167994	RAB3A interacting protein like 1 [Source:HGNC Symbol;Acc:HGNC:9780]	RAB3IL1	61.7393	159.513	-2.36016	1.36718e-09	51.4367	159.513	-2.78032	8.35835e-13	Y	Y	62.5693	49.927	41.8136	64.1778	61.1631	59.877	156.317	184.323	137.899
ENSG00000226374	ENSG00000226374	long intergenic non-protein coding RNA 1345 [Source:HGNC Symbol;Acc:HGNC:50564]	LINC01345	8.31659	32.8443	-2.37931	0.000569599	7.37438	32.8443	-2.51406	0.000238617	Y	Y	5.68812	6.85273	9.58229	5.4388	5.47729	14.0337	43.2367	29.1585	26.1376
ENSG00000109452	ENSG00000109452	inositol polyphosphate-4-phosphatase type II B [Source:HGNC Symbol;Acc:HGNC:6075]	INPP4B	557.047	1382.32	-2.38884	3.57071e-21	200.069	1382.32	-6.3198	2.81584e-84	Y	Y	241.176	183.066	175.966	460.122	624.411	586.607	1300.43	1455.84	1390.7
ENSG00000116299	ENSG00000116299	KIAA1324 [Source:HGNC Symbol;Acc:HGNC:29618]	KIAA1324	36.1119	98.5198	-2.39606	1.92749e-07	27.0521	98.5198	-3.0308	6.82406e-11	Y	Y	29.5782	33.2847	18.2935	38.0716	33.7766	36.4875	95.3425	94.7651	105.452
ENSG00000160539	ENSG00000160539	phospholipid phosphatase 7 (inactive) [Source:HGNC Symbol;Acc:HGNC:28174]	PLPP7	121.843	314.566	-2.40502	2.38101e-12	143.072	314.566	-2.07048	7.46389e-09	Y	Y	152.442	124.328	152.446	157.725	108.633	99.1713	340.351	331.157	272.192
ENSG00000168913	ENSG00000168913	energy homeostasis associated [Source:HGNC Symbol;Acc:HGNC:24838]	ENHO	4.53868	21.1033	-2.40711	0.000676346	6.50326	21.1033	-2.05452	0.00730563	Y	Y	5.68812	6.85273	6.96894	4.35104	3.65153	5.61347	22.1727	17.7034	23.4337
ENSG00000127533	ENSG00000127533	F2R like thrombin or trypsin receptor 3 [Source:HGNC Symbol;Acc:HGNC:3540]	F2RL3	10.8395	45.6735	-2.40806	0.000638772	7.4314	45.6735	-2.84601	2.8189e-05	Y	Y	2.27525	15.6634	4.35559	6.52656	8.21594	17.776	42.1281	35.4067	59.4856
ENSG00000073464	ENSG00000073464	chloride voltage-gated channel 4 [Source:HGNC Symbol;Acc:HGNC:2022]	CLCN4	254.039	627.374	-2.40829	7.10752e-33	304.028	627.374	-2.02719	4.03304e-22	Y	Y	306.021	322.078	283.984	250.185	256.52	255.413	640.79	638.362	602.968
ENSG00000218803	ENSG00000218803	glutathione S-transferase mu 2 pseudogene 1 [Source:HGNC Symbol;Acc:HGNC:38009]	GSTM2P1	8.92524	32.2914	-2.41154	0.000299431	7.65783	32.2914	-2.60769	8.08698e-05	Y	Y	10.2386	4.8948	7.84005	11.9654	6.39017	8.4202	34.3676	29.1585	33.348
ENSG00000206561	ENSG00000206561	collagen like tail subunit of asymmetric acetylcholinesterase [Source:HGNC Symbol;Acc:HGNC:2226]	COLQ	10.723	36.5017	-2.42368	8.45993e-05	13.4027	36.5017	-2.104	0.00117002	Y	Y	13.6515	11.7475	14.809	10.8776	9.12882	12.1625	36.5849	39.5722	33.348
ENSG00000151892	ENSG00000151892	GDNF family receptor alpha 1 [Source:HGNC Symbol;Acc:HGNC:4243]	GFRA1	8874.55	22712.4	-2.44023	2.42841e-18	1051.15	22712.4	-18.2242	5.06824e-187	Y	Y	853.218	984.835	1315.39	7237.95	9913.9	9471.79	20439.9	24461.9	23235.5
ENSG00000087116	ENSG00000087116	ADAM metallopeptidase with thrombospondin type 1 motif 2 [Source:HGNC Symbol;Acc:HGNC:218]	ADAMTS2	2.47218	19.4405	-2.45016	0.00118245	2.16947	19.4405	-2.55399	0.000614722	Y	Y	4.5505	1.95792	0	0	2.73865	4.67789	18.8468	18.7447	20.7298
ENSG00000140481	ENSG00000140481	coiled-coil domain containing 33 [Source:HGNC Symbol;Acc:HGNC:26552]	CCDC33	0.362587	12.8098	-2.45897	0.00123996	0	12.8098	-2.56247	0.000103403	Y	Y	0	0	0	1.08776	0	0	8.86907	18.7447	10.8156
ENSG00000234617	ENSG00000234617	SNRK antisense RNA 1 [Source:HGNC Symbol;Acc:HGNC:41269]	SNRK-AS1	1.65319	14.6332	-2.46154	0.001092	2.95175	14.6332	-2.13751	0.00790881	Y	Y	3.41287	1.95792	3.48447	2.17552	0.912882	1.87116	15.5209	16.662	11.7169
ENSG00000169252	ENSG00000169252	adrenoceptor beta 2 [Source:HGNC Symbol;Acc:HGNC:286]	ADRB2	28.5484	84.9813	-2.46192	7.76075e-07	32.1803	84.9813	-2.25984	8.58148e-06	Y	Y	32.9911	39.1584	24.3913	22.843	32.8638	29.9385	86.4734	99.9719	68.4986
ENSG00000100344	ENSG00000100344	patatin like phospholipase domain containing 3 [Source:HGNC Symbol;Acc:HGNC:18590]	PNPLA3	69.5691	188.96	-2.46771	1.39543e-10	58.7766	188.96	-2.84027	1.74931e-13	Y	Y	45.505	56.7797	74.045	59.8268	70.2919	78.5886	161.861	196.82	208.2
ENSG00000196411	ENSG00000196411	EPH receptor B4 [Source:HGNC Symbol;Acc:HGNC:3395]	EPHB4	57.657	154.899	-2.47367	3.05054e-11	32.5723	154.899	-4.04311	3.09473e-22	Y	Y	39.8169	27.4109	30.4891	56.5635	59.3373	57.0703	161.861	154.123	148.714
ENSG00000236871	ENSG00000236871	long intergenic non-protein coding RNA 106 [Source:HGNC Symbol;Acc:HGNC:31843]	LINC00106	25.8983	82.935	-2.47439	1.96891e-05	16.6638	82.935	-3.31329	1.24809e-08	Y	Y	15.9267	16.6423	17.4223	23.9307	20.0834	33.6808	62.0835	61.4411	125.28
ENSG00000062038	ENSG00000062038	cadherin 3 [Source:HGNC Symbol;Acc:HGNC:1762]	CDH3	1.08776	15.8801	-2.48814	0.00120864	0.907065	15.8801	-2.50741	0.00130255	Y	Y	0	0.978961	1.74223	3.26328	0	0	21.064	16.662	9.91427
ENSG00000198189	ENSG00000198189	hydroxysteroid 17-beta dehydrogenase 11 [Source:HGNC Symbol;Acc:HGNC:22960]	HSD17B11	631.837	1614.57	-2.48844	2.95864e-33	426.621	1614.57	-3.63767	9.94618e-64	Y	Y	447.086	418.995	413.781	653.744	704.745	537.022	1722.82	1512.08	1608.82
ENSG00000114374	ENSG00000114374	ubiquitin specific peptidase 9 Y-linked [Source:HGNC Symbol;Acc:HGNC:12633]	USP9Y	746.497	1907.37	-2.49618	7.59032e-33	7.63366	1907.37	-95.2339	6.97566e-141	Y	Y	3.41287	2.93688	16.5512	712.483	746.737	780.272	1717.27	1905.72	2099.12
ENSG00000184985	ENSG00000184985	sortilin related VPS10 domain containing receptor 2 [Source:HGNC Symbol;Acc:HGNC:16698]	SORCS2	1727.35	4490.35	-2.49679	2.08803e-23	1725.47	4490.35	-2.49873	2.09099e-23	Y	Y	1820.2	1729.82	1626.38	2100.46	1701.61	1379.98	4494.4	4949.65	4027
ENSG00000162390	ENSG00000162390	acyl-CoA thioesterase 11 [Source:HGNC Symbol;Acc:HGNC:18156]	ACOT11	20.4899	64.7225	-2.49944	1.24505e-05	9.76925	64.7225	-3.93898	1.44615e-10	Y	Y	5.68812	8.81065	14.809	20.6674	14.6061	26.1962	65.4094	59.3583	69.3999
ENSG00000165323	ENSG00000165323	FAT atypical cadherin 3 [Source:HGNC Symbol;Acc:HGNC:23112]	FAT3	2.01577	16.5012	-2.49999	0.00108763	1.66548	16.5012	-2.58557	0.000762706	Y	Y	2.27525	0.978961	1.74223	3.26328	0.912882	1.87116	21.064	10.4137	18.026
ENSG00000132016	ENSG00000132016	chromosome 19 open reading frame 57 [Source:HGNC Symbol;Acc:HGNC:28153]	C19orf57	16.0149	52.3308	-2.50287	1.57155e-05	13.8227	52.3308	-2.72893	2.48933e-06	Y	Y	12.5139	9.78961	19.1646	18.4919	15.519	14.0337	55.4317	44.7791	56.7818
ENSG00000135114	ENSG00000135114	2'-5'-oligoadenylate synthetase like [Source:HGNC Symbol;Acc:HGNC:8090]	OASL	43.863	126.082	-2.50446	1.241e-08	39.8119	126.082	-2.71143	7.21808e-10	Y	Y	38.6792	37.2005	43.5559	38.0716	39.2539	54.2635	135.253	144.751	98.2414
ENSG00000183638	ENSG00000183638	RP1 like 1 [Source:HGNC Symbol;Acc:HGNC:15946]	RP1L1	5.46669	25.2872	-2.50709	0.000359467	5.76179	25.2872	-2.43933	0.000604921	Y	Y	4.5505	4.8948	7.84005	4.35104	4.56441	7.48463	24.3899	20.8275	30.6441
ENSG00000185052	ENSG00000185052	solute carrier family 24 member 3 [Source:HGNC Symbol;Acc:HGNC:10977]	SLC24A3	3.09597	20.4818	-2.51511	0.000607485	3.67629	20.4818	-2.37385	0.00164892	Y	Y	3.41287	5.87376	1.74223	6.52656	1.82576	0.935578	18.8468	21.8689	20.7298
ENSG00000242366	ENSG00000242366	UDP glucuronosyltransferase family 1 member A8 [Source:HGNC Symbol;Acc:HGNC:12540]	UGT1A8	89.6436	249.603	-2.51809	5.52571e-11	73.5395	249.603	-2.97508	1.29174e-14	Y	Y	58.0188	76.3589	86.2406	92.4596	89.4624	87.0088	302.657	261.385	184.766
ENSG00000284052	ENSG00000284052	novel transcript		14.2451	48.0591	-2.51815	2.19624e-05	12.1503	48.0591	-2.78619	2.6601e-06	Y	Y	14.7891	6.85273	14.809	14.1409	16.4319	12.1625	46.5626	48.9446	48.6701
ENSG00000228201	ENSG00000228201	uncharacterized LOC105371038 [Source:NCBI gene;Acc:105371038]		2.26177	18.1251	-2.52966	0.000605444	3.67422	18.1251	-2.2212	0.00439278	Y	Y	5.68812	0.978961	4.35559	2.17552	2.73865	1.87116	18.8468	22.9102	12.6182
ENSG00000156103	ENSG00000156103	matrix metallopeptidase 16 [Source:HGNC Symbol;Acc:HGNC:7162]	MMP16	785.471	2131.03	-2.52979	3.58834e-15	499.469	2131.03	-3.84208	8.31847e-31	Y	Y	432.297	536.471	529.639	524.3	855.37	976.744	2047.65	2039.01	2306.42
ENSG00000227398	ENSG00000227398	KIF9 antisense RNA 1 [Source:HGNC Symbol;Acc:HGNC:26822]	KIF9-AS1	103.179	275.505	-2.53267	4.2393e-18	126.415	275.505	-2.09703	3.62522e-12	Y	Y	125.139	139.991	114.116	110.951	103.156	95.429	251.66	280.13	294.724
ENSG00000174236	ENSG00000174236	RAB15 effector protein [Source:HGNC Symbol;Acc:HGNC:33748]	REP15	7.93887	34.909	-2.54474	0.000120519	12.0445	34.909	-2.04874	0.00468526	Y	Y	12.5139	8.81065	14.809	4.35104	7.30306	12.1625	22.1727	37.4895	45.0649
ENSG00000196387	ENSG00000196387	zinc finger protein 140 [Source:HGNC Symbol;Acc:HGNC:12925]	ZNF140	124.417	335.676	-2.55864	6.13849e-18	120.41	335.676	-2.62303	1.10543e-18	Y	Y	118.313	117.475	125.441	153.374	112.284	107.591	361.415	310.33	335.283
ENSG00000074219	ENSG00000074219	TEA domain transcription factor 2 [Source:HGNC Symbol;Acc:HGNC:11715]	TEAD2	2.00821	17.0386	-2.57532	0.00101344	0.580745	17.0386	-3.00387	0.000425949	Y	Y	0	0	1.74223	3.26328	1.82576	0.935578	13.3036	19.7861	18.026
ENSG00000103485	ENSG00000103485	quinolinate phosphoribosyltransferase [Source:HGNC Symbol;Acc:HGNC:9755]	QPRT	1066.77	2940.94	-2.58799	3.16771e-17	288.963	2940.94	-8.68264	5.02762e-83	Y	Y	357.214	237.887	271.789	858.242	1191.31	1150.76	2690.65	3589.62	2542.56
ENSG00000109667	ENSG00000109667	solute carrier family 2 member 9 [Source:HGNC Symbol;Acc:HGNC:13446]	SLC2A9	11.4685	44.9859	-2.58852	4.08816e-05	12.0255	44.9859	-2.52361	7.15339e-05	Y	Y	13.6515	5.87376	16.5512	7.61432	13.6932	13.0981	48.7799	51.0273	35.1506
ENSG00000235706	ENSG00000235706	DICER1 antisense RNA 1 [Source:HGNC Symbol;Acc:HGNC:43017]	DICER1-AS1	33.4066	102.056	-2.61967	9.50307e-09	34.3335	102.056	-2.55842	2.32276e-08	Y	Y	38.6792	30.3478	33.9736	40.2471	33.7766	26.1962	116.407	104.137	85.6233
ENSG00000112655	ENSG00000112655	protein tyrosine kinase 7 (inactive) [Source:HGNC Symbol;Acc:HGNC:9618]	PTK7	389.273	1070.32	-2.62998	6.31638e-23	79.111	1070.32	-11.4518	6.22458e-112	Y	Y	92.1476	68.5273	76.6583	410.085	379.759	377.974	899.102	1293.39	1018.47
ENSG00000254300	ENSG00000254300	long intergenic non-protein coding RNA 1111 [Source:HGNC Symbol;Acc:HGNC:49237]	LINC01111	88.6322	252.433	-2.63454	8.10867e-15	62.429	252.433	-3.58166	1.68167e-23	Y	Y	52.3307	62.6535	72.3027	79.4065	100.417	86.0732	260.529	215.564	281.205
ENSG00000250303	ENSG00000250303	uncharacterized LOC283140 [Source:NCBI gene;Acc:283140]		84.6106	244.199	-2.64269	4.01224e-14	86.2742	244.199	-2.6106	9.33238e-14	Y	Y	103.524	81.2537	74.045	84.8452	89.4624	79.5241	276.05	258.261	198.285
ENSG00000100739	ENSG00000100739	bradykinin receptor B1 [Source:HGNC Symbol;Acc:HGNC:1029]	BDKRB1	16.6385	61.0824	-2.65271	6.1283e-06	15.4114	61.0824	-2.79643	1.95056e-06	Y	Y	17.0644	11.7475	17.4223	11.9654	16.4319	21.5183	58.7576	81.2272	43.2623
ENSG00000223552	ENSG00000223552	uncharacterized LOC102724297 [Source:NCBI gene;Acc:102724297]		4.83541	26.26	-2.65579	0.000198958	4.54048	26.26	-2.75378	0.000112206	Y	Y	7.96337	3.91584	1.74223	4.35104	5.47729	4.67789	29.9331	28.1171	20.7298
ENSG00000128045	ENSG00000128045	RAS like family 11 member B [Source:HGNC Symbol;Acc:HGNC:23804]	RASL11B	5.77862	29.5853	-2.66606	0.00048164	0	29.5853	-4.55819	1.07952e-07	Y	Y	0	0	0	10.8776	3.65153	2.80673	33.259	23.9516	31.5454
ENSG00000138642	ENSG00000138642	HECT and RLD domain containing E3 ubiquitin protein ligase family member 6 [Source:HGNC Symbol;Acc:HGNC:26072]	HERC6	284.031	783.007	-2.6668	1.03366e-34	292.749	783.007	-2.59552	7.46627e-33	Y	Y	293.507	302.499	282.242	253.448	268.387	330.259	770.5	766.451	812.069
ENSG00000180346	ENSG00000180346	tigger transposable element derived 2 [Source:HGNC Symbol;Acc:HGNC:18333]	TIGD2	249.256	695.941	-2.67607	2.03562e-28	242.214	695.941	-2.74905	1.0351e-29	Y	Y	210.46	265.298	250.882	213.201	249.217	285.351	727.264	673.769	686.789
ENSG00000134202	ENSG00000134202	glutathione S-transferase mu 3 [Source:HGNC Symbol;Acc:HGNC:4635]	GSTM3	1645.18	4472.44	-2.68065	1.92669e-81	1825.48	4472.44	-2.42076	7.49702e-66	Y	Y	1886.18	1790.52	1799.73	1605.53	1644.1	1685.91	4635.2	4655.98	4126.14
ENSG00000283646	ENSG00000283646	long intergenic non-protein coding RNA 2009 [Source:HGNC Symbol;Acc:HGNC:52845]	LINC02009	5.47959	31.9224	-2.68312	0.000214371	3.54458	31.9224	-3.13236	1.29905e-05	Y	Y	6.82575	2.93688	0.871117	5.4388	9.12882	1.87116	39.9108	33.324	22.5324
ENSG00000205403	ENSG00000205403	complement factor I [Source:HGNC Symbol;Acc:HGNC:5394]	CFI	0.311859	14.2898	-2.69561	0.000551261	0.616693	14.2898	-2.58581	0.00182802	Y	Y	0	0.978961	0.871117	0	0	0.935578	11.0863	21.8689	9.91427
ENSG00000205426	ENSG00000205426	keratin 81 [Source:HGNC Symbol;Acc:HGNC:6458]	KRT81	435.088	1240.6	-2.69739	6.29802e-21	138.382	1240.6	-7.7985	4.75428e-79	Y	Y	171.781	105.728	137.637	502.545	451.877	350.842	1310.41	1282.97	1128.42
ENSG00000167771	ENSG00000167771	REST corepressor 2 [Source:HGNC Symbol;Acc:HGNC:27455]	RCOR2	35.4375	111.628	-2.70943	3.08462e-12	257.858	111.628	2.18659	7.98607e-10	Y		259.378	286.836	227.362	43.5104	32.8638	29.9385	125.276	117.675	91.9324
ENSG00000117228	ENSG00000117228	guanylate binding protein 1 [Source:HGNC Symbol;Acc:HGNC:4182]	GBP1	1119.41	3158.9	-2.71213	3.76991e-31	1471.78	3158.9	-2.08553	2.84882e-17	Y	Y	1329.88	1470.4	1615.05	938.737	1088.16	1331.33	3085.33	2950.21	3441.15
ENSG00000065989	ENSG00000065989	phosphodiesterase 4A [Source:HGNC Symbol;Acc:HGNC:8780]	PDE4A	294.503	825.535	-2.71225	3.20838e-37	385.329	825.535	-2.09771	1.69062e-21	Y	Y	397.031	413.121	345.834	284.993	311.293	287.222	813.737	897.665	765.202
ENSG00000259823	ENSG00000259823	LY6/PLAUR domain containing 8 [Source:HGNC Symbol;Acc:HGNC:44208]	LYPD8	0.362587	15.8595	-2.74572	0.000344258	1.35817	15.8595	-2.44842	0.00188869	Y	Y	1.13762	2.93688	0	1.08776	0	0	17.7381	20.8275	9.01298
ENSG00000138738	ENSG00000138738	PR/SET domain 5 [Source:HGNC Symbol;Acc:HGNC:9349]	PRDM5	59.0696	177.337	-2.75004	1.18017e-14	42.9074	177.337	-3.62068	1.9229e-21	Y	Y	42.0921	43.0743	43.5559	60.9145	63.9017	52.3924	196.228	164.537	171.247
ENSG00000142910	ENSG00000142910	tubulointerstitial nephritis antigen like 1 [Source:HGNC Symbol;Acc:HGNC:19168]	TINAGL1	7107.42	20504.7	-2.75248	1.36707e-27	8107.79	20504.7	-2.42744	2.87088e-21	Y	Y	9310.32	7427.38	7585.69	8077.7	7392.52	5852.04	21476.5	22756.1	17281.5
ENSG00000104998	ENSG00000104998	interleukin 27 receptor subunit alpha [Source:HGNC Symbol;Acc:HGNC:17290]	IL27RA	129.666	376.943	-2.75893	8.40982e-26	172.167	376.943	-2.11666	4.22688e-15	Y	Y	170.644	182.087	163.77	124.005	141.497	123.496	385.805	406.136	338.888
ENSG00000226088	ENSG00000226088	novel transcript		0.674446	15.4673	-2.76225	0.000795413	1.25033	15.4673	-2.56166	0.00127125	Y	Y	1.13762	0	2.61335	1.08776	0	0.935578	12.195	19.7861	14.4208
ENSG00000183873	ENSG00000183873	sodium voltage-gated channel alpha subunit 5 [Source:HGNC Symbol;Acc:HGNC:10593]	SCN5A	6.47569	38.6564	-2.769	0.000173479	2.11659	38.6564	-3.81647	5.41503e-07	Y	Y	3.41287	2.93688	0	5.4388	1.82576	12.1625	23.2813	45.8205	46.8675
ENSG00000138650	ENSG00000138650	protocadherin 10 [Source:HGNC Symbol;Acc:HGNC:13404]	PCDH10	1.89919	18.3769	-2.78888	0.000363509	0.943013	18.3769	-3.11087	0.000163923	Y	Y	0	1.95792	0.871117	1.08776	2.73865	1.87116	21.064	18.7447	15.3221
ENSG00000105173	ENSG00000105173	cyclin E1 [Source:HGNC Symbol;Acc:HGNC:1589]	CCNE1	195.846	569.062	-2.793	2.65038e-30	267.369	569.062	-2.07008	3.41359e-16	Y	Y	259.378	284.878	257.851	230.605	168.883	188.051	559.86	542.556	604.771
ENSG00000225830	ENSG00000225830	ERCC excision repair 6, chromatin remodeling factor [Source:HGNC Symbol;Acc:HGNC:3438]	ERCC6	452.818	1304.21	-2.79436	4.76399e-45	464.219	1304.21	-2.73235	3.65836e-43	Y	Y	443.673	501.228	447.754	388.33	492.043	478.08	1334.8	1314.21	1263.62
ENSG00000009694	ENSG00000009694	teneurin transmembrane protein 1 [Source:HGNC Symbol;Acc:HGNC:8117]	TENM1	1.33376	20.343	-2.80377	0.000388246	0	20.343	-3.23674	5.19574e-06	Y	Y	0	0	0	2.17552	1.82576	0	9.9777	17.7034	33.348
ENSG00000090661	ENSG00000090661	ceramide synthase 4 [Source:HGNC Symbol;Acc:HGNC:23747]	CERS4	0.304294	15.1444	-2.81385	0.00045615	0	15.1444	-2.92487	2.88353e-05	Y	Y	0	0	0	0	0.912882	0	11.0863	20.8275	13.5195
ENSG00000047936	ENSG00000047936	ROS proto-oncogene 1, receptor tyrosine kinase [Source:HGNC Symbol;Acc:HGNC:10261]	ROS1	5.72026	31.0928	-2.82054	3.97284e-05	6.7048	31.0928	-2.62103	0.000156868	Y	Y	4.5505	6.85273	8.71117	3.26328	5.47729	8.4202	23.2813	31.2412	38.7558
ENSG00000101210	ENSG00000101210	eukaryotic translation elongation factor 1 alpha 2 [Source:HGNC Symbol;Acc:HGNC:3192]	EEF1A2	7463.79	21682.9	-2.82463	6.47228e-48	8536.68	21682.9	-2.47873	1.01708e-36	Y	Y	8234.12	8498.36	8877.56	6340.55	7637.17	8413.65	20582.9	23669.4	20796.5
ENSG00000189184	ENSG00000189184	protocadherin 18 [Source:HGNC Symbol;Acc:HGNC:14268]	PCDH18	2.61679	21.1502	-2.83256	0.000298361	0.32632	21.1502	-3.669	3.98624e-05	Y	Y	0	0.978961	0	3.26328	3.65153	0.935578	25.4986	20.8275	17.1247
ENSG00000120318	ENSG00000120318	ArfGAP with RhoGAP domain, ankyrin repeat and PH domain 3 [Source:HGNC Symbol;Acc:HGNC:24097]	ARAP3	291.233	862.286	-2.83712	3.24064e-32	177.04	862.286	-4.54939	2.093e-62	Y	Y	180.882	158.592	191.646	244.746	291.209	337.744	822.606	914.327	849.924
ENSG00000158473	ENSG00000158473	CD1d molecule [Source:HGNC Symbol;Acc:HGNC:1637]	CD1D	15.1882	59.4567	-2.84655	1.19026e-06	10.5498	59.4567	-3.6031	3.954e-09	Y	Y	17.0644	5.87376	8.71117	14.1409	15.519	15.9048	63.1921	65.6066	49.5714
ENSG00000270504	ENSG00000270504	novel transcript, antisense to PXDC1		174.762	554.033	-2.87218	3.25523e-16	227.527	554.033	-2.26482	3.7169e-10	Y	Y	268.479	208.519	205.584	204.499	195.357	124.432	583.141	637.321	441.636
ENSG00000111348	ENSG00000111348	Rho GDP dissociation inhibitor beta [Source:HGNC Symbol;Acc:HGNC:679]	ARHGDIB	228.159	695.431	-2.87913	5.21916e-25	253.991	695.431	-2.6011	1.05835e-20	Y	Y	282.131	235.93	243.913	277.379	220.917	186.18	773.826	691.473	620.994
ENSG00000213318	ENSG00000213318	ribosomal protein S4, Y-linked 2 (RPS4Y2) pseudogene		19.6535	76.498	-2.89246	2.15158e-06	1.45186	76.498	-8.11914	5.12449e-13	Y	Y	0	0	4.35559	17.4042	21.9092	19.6471	84.2562	94.7651	50.4727
ENSG00000102879	ENSG00000102879	coronin 1A [Source:HGNC Symbol;Acc:HGNC:2252]	CORO1A	22.5488	83.3354	-2.89726	1.5348e-08	25.4323	83.3354	-2.6502	2.22927e-07	Y	Y	22.7525	27.4109	26.1335	18.4919	17.3448	31.8097	90.908	90.5996	68.4986
ENSG00000260442	ENSG00000260442	ATP2A1 antisense RNA 1 [Source:HGNC Symbol;Acc:HGNC:51370]	ATP2A1-AS1	75.8169	245.426	-2.90365	5.67889e-15	52.4367	245.426	-4.02788	1.95228e-23	Y	Y	59.1565	60.6956	37.458	62.0023	81.2465	84.202	266.072	259.302	210.904
ENSG00000143126	ENSG00000143126	cadherin EGF LAG seven-pass G-type receptor 2 [Source:HGNC Symbol;Acc:HGNC:3231]	CELSR2	2190	6535.85	-2.91918	7.63998e-66	3000.64	6535.85	-2.14547	7.39533e-34	Y	Y	3171.7	3011.28	2818.94	2154.85	2213.74	2201.42	5958.91	7359.39	6289.25
ENSG00000146411	ENSG00000146411	solute carrier family 2 member 12 [Source:HGNC Symbol;Acc:HGNC:18067]	SLC2A12	195.879	651.094	-2.95827	2.91103e-15	213.773	651.094	-2.73997	2.67429e-13	Y	Y	262.791	178.171	200.357	220.815	222.743	144.079	644.116	814.355	494.812
ENSG00000171813	ENSG00000171813	PWWP domain containing 2B [Source:HGNC Symbol;Acc:HGNC:25150]	PWWP2B	74.4427	243.428	-2.95879	5.30309e-16	72.1657	243.428	-3.02855	1.62469e-16	Y	Y	78.4961	66.5693	71.4316	96.8106	66.6404	59.877	240.574	277.006	212.706
ENSG00000177335	ENSG00000177335	chromosome 8 open reading frame 31 (putative) [Source:HGNC Symbol;Acc:HGNC:26731]	C8orf31	19.8715	77.6941	-2.95938	1.29838e-07	9.2196	77.6941	-4.7854	2.49766e-13	Y	Y	7.96337	12.7265	6.96894	15.2286	20.9963	23.3895	90.908	85.3927	56.7818
ENSG00000105426	ENSG00000105426	protein tyrosine phosphatase, receptor type S [Source:HGNC Symbol;Acc:HGNC:9681]	PTPRS	667.001	2075.45	-2.99414	1.85062e-40	651.768	2075.45	-3.05731	6.93241e-42	Y	Y	598.39	677.441	679.471	722.272	685.574	593.157	1841.44	2412.86	1972.04
ENSG00000165181	ENSG00000165181	chromosome 9 open reading frame 84 [Source:HGNC Symbol;Acc:HGNC:26535]	C9orf84	18.6747	72.8905	-2.99971	5.20123e-09	31.0963	72.8905	-2.05154	0.0001442	Y	Y	32.9911	25.453	34.8447	16.3164	20.9963	18.7116	57.649	78.1031	82.9194
ENSG00000253671	ENSG00000253671	novel transcript		8.33705	41.3559	-3.01477	3.49358e-06	7.51124	41.3559	-3.22144	9.60332e-07	Y	Y	10.2386	8.81065	3.48447	6.52656	9.12882	9.35578	43.2367	44.7791	36.0519
ENSG00000213401	ENSG00000213401	MAGE family member A12 [Source:HGNC Symbol;Acc:HGNC:6799]	MAGEA12	59.6599	195.807	-3.02304	8.94821e-16	3.38385	195.807	-18.0558	1.03708e-31	Y	Y	5.68812	0.978961	3.48447	58.739	55.6858	64.5549	210.64	181.199	195.582
ENSG00000114698	ENSG00000114698	phospholipid scramblase 4 [Source:HGNC Symbol;Acc:HGNC:16497]	PLSCR4	2.56607	24.5695	-3.02469	4.28518e-07	139.801	24.5695	4.46638	1.89685e-15	Y		154.717	125.307	139.379	2.17552	3.65153	1.87116	35.4763	22.9102	15.3221
ENSG00000278341	ENSG00000278341	novel transcript, antisense to CTU2		13.071	57.1252	-3.05429	9.96484e-08	17.3814	57.1252	-2.56132	7.26219e-06	Y	Y	20.4772	18.6003	13.0668	8.70208	14.6061	15.9048	49.8885	65.6066	55.8805
ENSG00000123342	ENSG00000123342	matrix metallopeptidase 19 [Source:HGNC Symbol;Acc:HGNC:7165]	MMP19	93.4519	314.524	-3.12076	1.35872e-23	96.8347	314.524	-3.01654	2.65492e-22	Y	Y	101.249	96.9171	92.3384	106.6	85.8109	87.9443	339.242	338.447	265.883
ENSG00000229207	ENSG00000229207	serpin family H member 1 pseudogene 1 [Source:HGNC Symbol;Acc:HGNC:19917]	SERPINH1P1	14.8764	69.5884	-3.13496	9.80177e-08	18.9211	69.5884	-2.66923	5.47138e-06	Y	Y	9.10099	29.3688	18.2935	14.1409	15.519	14.9693	65.4094	87.4754	55.8805
ENSG00000268621	ENSG00000268621	IGFL2 antisense RNA 1 [Source:HGNC Symbol;Acc:HGNC:52559]	IGFL2-AS1	2.52291	29.816	-3.13586	4.05813e-05	1.25033	29.816	-3.52718	1.0473e-05	Y	Y	1.13762	0	2.61335	1.08776	2.73865	3.74231	47.6713	29.1585	12.6182
ENSG00000157150	ENSG00000157150	TIMP metallopeptidase inhibitor 4 [Source:HGNC Symbol;Acc:HGNC:11823]	TIMP4	23.6548	94.7076	-3.16177	1.78989e-10	30.3361	94.7076	-2.64268	6.40294e-08	Y	Y	43.2297	22.5161	25.2624	23.9307	27.3865	19.6471	95.3425	96.8478	91.9324
ENSG00000178878	ENSG00000178878	apolipoprotein L domain containing 1 [Source:HGNC Symbol;Acc:HGNC:25268]	APOLD1	362.782	1205.48	-3.1855	7.73662e-44	444.56	1205.48	-2.62535	4.09128e-31	Y	Y	510.793	400.395	422.492	379.628	394.365	314.354	1168.5	1293.39	1154.56
ENSG00000138769	ENSG00000138769	cyclin dependent kinase like 2 [Source:HGNC Symbol;Acc:HGNC:1782]	CDKL2	0.362587	18.6826	-3.19781	0.000144961	0	18.6826	-3.33245	7.16188e-06	Y	Y	0	0	0	1.08776	0	0	11.0863	26.0344	18.9273
ENSG00000143375	ENSG00000143375	cingulin [Source:HGNC Symbol;Acc:HGNC:17429]	CGN	42.0371	171.362	-3.19917	2.18995e-10	28.5589	171.362	-4.29595	2.82396e-15	Y	Y	28.4406	37.2005	20.0357	25.0185	35.6024	65.4905	180.707	180.158	153.221
ENSG00000176092	ENSG00000176092	crystallin beta-gamma domain containing 2 [Source:HGNC Symbol;Acc:HGNC:17295]	CRYBG2	12.0363	58.2565	-3.20116	2.10257e-07	10.444	58.2565	-3.46565	3.45478e-08	Y	Y	14.7891	7.83169	8.71117	18.4919	6.39017	11.2269	57.649	66.648	50.4727
ENSG00000183044	ENSG00000183044	4-aminobutyrate aminotransferase [Source:HGNC Symbol;Acc:HGNC:23]	ABAT	29.276	124.236	-3.20761	4.51403e-10	52.8978	124.236	-2.04106	0.000209643	Y	Y	65.9822	58.7376	33.9736	43.5104	23.7349	20.5827	124.167	145.792	102.748
ENSG00000145284	ENSG00000145284	stearoyl-CoA desaturase 5 [Source:HGNC Symbol;Acc:HGNC:21088]	SCD5	45.2172	170.394	-3.22156	2.40843e-13	20.7	170.394	-5.78886	5.39353e-25	Y	Y	11.3762	17.6213	33.1025	41.3349	44.7312	49.5856	158.535	175.992	176.654
ENSG00000141524	ENSG00000141524	transmembrane channel like 6 [Source:HGNC Symbol;Acc:HGNC:18021]	TMC6	10.751	56.6747	-3.2475	1.32774e-07	15.9275	56.6747	-2.58407	2.46743e-05	Y	Y	22.7525	13.7055	11.3245	11.9654	11.8675	8.4202	76.4957	52.0687	41.4597
ENSG00000188761	ENSG00000188761	BCL2 like 15 [Source:HGNC Symbol;Acc:HGNC:33624]	BCL2L15	50.0753	184.643	-3.25621	2.06505e-18	64.0419	184.643	-2.64114	2.88662e-13	Y	Y	63.707	66.5693	61.8493	39.1593	48.3827	62.6837	197.337	171.827	184.766
ENSG00000142408	ENSG00000142408	calcium voltage-gated channel auxiliary subunit gamma 8 [Source:HGNC Symbol;Acc:HGNC:13628]	CACNG8	78.8313	282.47	-3.2615	6.54628e-19	18.7783	282.47	-10.3392	5.19994e-49	Y	Y	21.6149	14.6844	20.0357	83.7575	65.7275	87.0088	258.312	252.013	337.085
ENSG00000145416	ENSG00000145416	membrane associated ring-CH-type finger 1 [Source:HGNC Symbol;Acc:HGNC:26077]	MARCH1	9.74957	50.9276	-3.28109	8.27373e-08	14.8566	50.9276	-2.52738	3.02658e-05	Y	Y	11.3762	16.6423	16.5512	10.8776	13.6932	4.67789	48.7799	56.2342	47.7688
ENSG00000154165	ENSG00000154165	G protein-coupled receptor 15 [Source:HGNC Symbol;Acc:HGNC:4469]	GPR15	38.5486	150.316	-3.28287	3.22657e-14	55.2102	150.316	-2.41164	1.51287e-08	Y	Y	39.8169	58.7376	67.076	43.5104	33.7766	38.3587	138.579	178.075	134.293
ENSG00000100302	ENSG00000100302	RASD family member 2 [Source:HGNC Symbol;Acc:HGNC:18229]	RASD2	305.341	1645.48	-3.28464	2.31553e-08	619.442	1645.48	-2.03891	0.00230729	Y	Y	873.695	461.091	523.541	429.665	306.728	179.631	1782.68	1964.03	1189.71
ENSG00000066056	ENSG00000066056	tyrosine kinase with immunoglobulin like and EGF like domains 1 [Source:HGNC Symbol;Acc:HGNC:11809]	TIE1	151.3	547.966	-3.29161	1.05292e-21	82.9201	547.966	-5.63371	1.10375e-41	Y	Y	104.661	66.5693	77.5294	176.217	157.929	119.754	539.905	642.528	461.464
ENSG00000115318	ENSG00000115318	lysyl oxidase like 3 [Source:HGNC Symbol;Acc:HGNC:13869]	LOXL3	93.0567	327.603	-3.29949	2.64322e-31	93.0426	327.603	-3.29733	4.37196e-31	Y	Y	89.8723	96.9171	92.3384	93.5473	97.6784	87.9443	342.568	337.405	302.836
ENSG00000276931	ENSG00000276931	novel transcript, sense intronic to LMF1		8.40291	45.9355	-3.30042	1.60523e-07	12.1644	45.9355	-2.69744	1.3066e-05	Y	Y	15.9267	12.7265	7.84005	7.61432	7.30306	10.2914	43.2367	53.1101	41.4597
ENSG00000121797	ENSG00000121797	C-C motif chemokine receptor like 2 [Source:HGNC Symbol;Acc:HGNC:1612]	CCRL2	40.5188	162.338	-3.31726	8.42734e-14	46.527	162.338	-2.99139	8.28304e-12	Y	Y	59.1565	42.0953	38.3292	33.7205	41.9926	45.8433	197.337	163.496	126.182
ENSG00000104892	ENSG00000104892	kinesin light chain 3 [Source:HGNC Symbol;Acc:HGNC:20717]	KLC3	69.3084	284.25	-3.32268	4.8514e-13	118.692	284.25	-2.12974	9.34816e-06	Y	Y	162.68	94.9592	98.4362	100.074	64.8146	43.0366	323.721	281.171	247.857
ENSG00000168765	ENSG00000168765	glutathione S-transferase mu 4 [Source:HGNC Symbol;Acc:HGNC:4636]	GSTM4	298	1032.73	-3.32681	1.45646e-49	322.218	1032.73	-3.08367	6.26402e-44	Y	Y	331.049	289.772	345.834	315.45	324.073	254.477	1056.53	1073.66	967.994
ENSG00000253819	ENSG00000253819	long intergenic non-protein coding RNA 1151 [Source:HGNC Symbol;Acc:HGNC:49471]	LINC01151	10.0765	54.5782	-3.38886	3.82296e-08	12.1693	54.5782	-3.06248	4.34448e-07	Y	Y	13.6515	9.78961	13.0668	4.35104	12.7803	13.0981	57.649	58.317	47.7688
ENSG00000148948	ENSG00000148948	leucine rich repeat containing 4C [Source:HGNC Symbol;Acc:HGNC:29317]	LRRC4C	6.88144	43.8736	-3.38892	1.47639e-06	3.09348	43.8736	-4.57292	8.00791e-09	Y	Y	5.68812	0.978961	2.61335	7.61432	2.73865	10.2914	49.8885	44.7791	36.9532
ENSG00000203727	ENSG00000203727	sterile alpha motif domain containing 5 [Source:HGNC Symbol;Acc:HGNC:21180]	SAMD5	47.8241	190.141	-3.40898	3.83882e-14	3.84188	190.141	-15.4085	1.2221e-30	Y	Y	2.27525	4.8948	4.35559	32.6328	57.5116	53.328	223.944	177.034	169.444
ENSG00000197632	ENSG00000197632	serpin family B member 2 [Source:HGNC Symbol;Acc:HGNC:8584]	SERPINB2	41.0639	171.297	-3.44493	5.10011e-15	77.1866	171.297	-2.03471	7.74157e-06	Y	Y	75.0832	99.854	56.6226	44.5981	37.4282	41.1654	177.381	136.42	200.088
ENSG00000205336	ENSG00000205336	adhesion G protein-coupled receptor G1 [Source:HGNC Symbol;Acc:HGNC:4512]	ADGRG1	5437.27	19851.2	-3.45658	3.56342e-43	6735.74	19851.2	-2.81654	3.18282e-30	Y	Y	6107.9	7483.18	6616.13	4458.73	5522.02	6331.06	19057.4	22815.5	17680.8
ENSG00000131037	ENSG00000131037	EPS8 like 1 [Source:HGNC Symbol;Acc:HGNC:21295]	EPS8L1	32.8942	132.293	-3.46283	7.20396e-14	6.69787	132.293	-9.77462	2.13699e-27	Y	Y	9.10099	4.8948	6.09782	41.3349	26.4736	30.8741	129.71	130.172	136.997
ENSG00000268119	ENSG00000268119	uncharacterized LOC105372321 [Source:NCBI gene;Acc:105372321]		6.96013	44.5651	-3.48297	1.78523e-10	137.694	44.5651	2.71556	1.67867e-09	Y		154.717	131.181	127.183	3.26328	6.39017	11.2269	42.1281	37.4895	54.0779
ENSG00000158220	ENSG00000158220	extended synaptotagmin 3 [Source:HGNC Symbol;Acc:HGNC:24295]	ESYT3	9.0115	51.6963	-3.49919	2.26832e-08	12.5506	51.6963	-2.89704	1.85902e-06	Y	Y	12.5139	14.6844	10.4534	7.61432	9.12882	10.2914	39.9108	65.6066	49.5714
ENSG00000005102	ENSG00000005102	mesenchyme homeobox 1 [Source:HGNC Symbol;Acc:HGNC:7013]	MEOX1	6.29332	42.0274	-3.5351	8.35791e-08	12.1043	42.0274	-2.45639	0.000144974	Y	Y	9.10099	9.78961	17.4223	8.70208	4.56441	5.61347	38.8022	45.8205	41.4597
ENSG00000121753	ENSG00000121753	adhesion G protein-coupled receptor B2 [Source:HGNC Symbol;Acc:HGNC:944]	ADGRB2	369.483	1449.09	-3.55242	4.41252e-27	607.532	1449.09	-2.24727	1.3198e-11	Y	Y	756.52	567.797	498.279	448.157	347.808	312.483	1441.22	1717.23	1188.81
ENSG00000100461	ENSG00000100461	RNA binding motif protein 23 [Source:HGNC Symbol;Acc:HGNC:20155]	RBM23	235.986	871.639	-3.55644	5.44277e-53	15.577	871.639	-34.9631	1.17671e-131	Y	Y	15.9267	10.7686	20.0357	208.85	245.565	253.542	894.667	882.044	838.207
ENSG00000103811	ENSG00000103811	cathepsin H [Source:HGNC Symbol;Acc:HGNC:2535]	CTSH	135.321	550.017	-3.56397	5.06358e-20	72.3043	550.017	-6.09747	2.1496e-37	Y	Y	70.5327	71.4641	74.9161	171.866	142.41	91.6867	621.944	614.411	413.696
ENSG00000116667	ENSG00000116667	chromosome 1 open reading frame 21 [Source:HGNC Symbol;Acc:HGNC:15494]	C1orf21	64.2018	256.208	-3.58178	7.06546e-19	2.9877	256.208	-22.2231	1.35599e-33	Y	Y	3.41287	2.93688	2.61335	78.3187	69.379	44.9078	278.267	241.599	248.758
ENSG00000196876	ENSG00000196876	sodium voltage-gated channel alpha subunit 8 [Source:HGNC Symbol;Acc:HGNC:10596]	SCN8A	31.4943	160.004	-3.64707	5.35701e-11	22.4277	160.004	-4.6127	1.25743e-14	Y	Y	18.202	26.4319	22.649	18.4919	29.2122	46.7789	100.886	171.827	207.298
ENSG00000065325	ENSG00000065325	glucagon like peptide 2 receptor [Source:HGNC Symbol;Acc:HGNC:4325]	GLP2R	26.7885	121.414	-3.66072	1.67968e-15	40.4984	121.414	-2.62778	1.34251e-09	Y	Y	40.9545	35.2426	45.2981	23.9307	25.5607	30.8741	121.95	139.544	102.748
ENSG00000250337	ENSG00000250337	p53 upregulated regulator of p53 levels [Source:HGNC Symbol;Acc:HGNC:48995]	PURPL	3.0528	34.2522	-3.70985	2.09062e-06	1.61259	34.2522	-4.22467	6.17995e-07	Y	Y	1.13762	1.95792	1.74223	5.4388	0.912882	2.80673	33.259	20.8275	48.6701
ENSG00000049089	ENSG00000049089	collagen type IX alpha 2 chain [Source:HGNC Symbol;Acc:HGNC:2218]	COL9A2	22.8433	118.293	-3.83741	3.6589e-14	49.6143	118.293	-2.10446	2.58084e-05	Y	Y	44.3673	54.8218	49.6537	19.5797	25.5607	23.3895	133.036	141.627	80.2155
ENSG00000115350	ENSG00000115350	DNA polymerase epsilon 4, accessory subunit [Source:HGNC Symbol;Acc:HGNC:18755]	POLE4	151.966	630.844	-3.91356	4.14307e-44	52.9868	630.844	-10.0264	5.27468e-94	Y	Y	48.9178	42.0953	67.9471	167.515	141.497	146.886	629.704	590.459	672.368
ENSG00000124212	ENSG00000124212	prostaglandin I2 synthase [Source:HGNC Symbol;Acc:HGNC:9603]	PTGIS	365.827	1542.33	-3.91757	6.95723e-44	674.111	1542.33	-2.20016	1.74726e-15	Y	Y	741.731	656.883	623.72	381.804	377.933	337.744	1754.97	1692.23	1179.8
ENSG00000169174	ENSG00000169174	proprotein convertase subtilisin/kexin type 9 [Source:HGNC Symbol;Acc:HGNC:20001]	PCSK9	3.26321	38.9102	-3.93673	2.26079e-07	4.76588	38.9102	-3.45103	2.65918e-06	Y	Y	3.41287	3.91584	6.96894	3.26328	0.912882	5.61347	23.2813	44.7791	48.6701
ENSG00000181754	ENSG00000181754	adhesion molecule with Ig like domain 1 [Source:HGNC Symbol;Acc:HGNC:20824]	AMIGO1	1.89162	36.9752	-3.94505	4.53767e-07	5.82676	36.9752	-2.9185	7.78484e-05	Y	Y	9.10099	4.8948	3.48447	1.08776	3.65153	0.935578	17.7381	56.2342	36.9532
ENSG00000168685	ENSG00000168685	interleukin 7 receptor [Source:HGNC Symbol;Acc:HGNC:6024]	IL7R	1104.09	4525.26	-3.94726	1.29724e-81	662.221	4525.26	-6.49015	3.90583e-146	Y	Y	734.905	648.072	603.684	946.351	1173.05	1192.86	4681.76	4301.92	4592.11
ENSG00000182463	ENSG00000182463	teashirt zinc finger homeobox 2 [Source:HGNC Symbol;Acc:HGNC:13010]	TSHZ2	3.71212	37.7037	-3.94928	4.32495e-08	11.1326	37.7037	-2.38722	0.000488608	Y	Y	14.7891	10.7686	7.84005	6.52656	2.73865	1.87116	39.9108	41.655	31.5454
ENSG00000253802	ENSG00000253802	SIRT1 regulating lncRNA tumor promoter [Source:HGNC Symbol;Acc:HGNC:53902]	SIRLNT	9.5058	65.0902	-3.99671	2.93933e-09	5.41646	65.0902	-5.14484	1.17325e-11	Y	Y	5.68812	0.978961	9.58229	10.8776	5.47729	12.1625	68.7353	56.2342	70.3012
ENSG00000179403	ENSG00000179403	von Willebrand factor A domain containing 1 [Source:HGNC Symbol;Acc:HGNC:30910]	VWA1	73.4917	341.062	-4.03701	7.9756e-23	16.8684	341.062	-12.7905	5.20783e-52	Y	Y	25.0277	10.7686	14.809	70.7044	72.1177	77.653	390.239	376.978	255.969
ENSG00000149131	ENSG00000149131	serpin family G member 1 [Source:HGNC Symbol;Acc:HGNC:1228]	SERPING1	8.22047	65.5229	-4.03733	1.45626e-08	3.97668	65.5229	-5.48619	2.61645e-11	Y	Y	9.10099	1.95792	0.871117	4.35104	10.9546	9.35578	46.5626	83.3099	66.696
ENSG00000182326	ENSG00000182326	complement C1s [Source:HGNC Symbol;Acc:HGNC:1247]	C1S	21.8086	123.091	-4.06909	9.55309e-14	28.1058	123.091	-3.37517	8.42732e-11	Y	Y	29.5782	30.3478	24.3913	29.3695	17.3448	18.7116	154.1	132.255	82.9194
ENSG00000225756	ENSG00000225756	DBH antisense RNA 1 [Source:HGNC Symbol;Acc:HGNC:24155]	DBH-AS1	3.0528	39.6455	-4.09128	1.37135e-07	4.29784	39.6455	-3.60912	1.38585e-06	Y	Y	1.13762	3.91584	7.84005	5.4388	0.912882	2.80673	29.9331	38.5308	50.4727
ENSG00000111344	ENSG00000111344	RAS protein activator like 1 [Source:HGNC Symbol;Acc:HGNC:9873]	RASAL1	23.9052	128.562	-4.09606	1.40261e-14	14.7249	128.562	-5.71507	7.83346e-20	Y	Y	14.7891	13.7055	15.6801	20.6674	16.4319	34.6164	105.32	147.875	132.491
ENSG00000178718	ENSG00000178718	ribonuclease P and MRP subunit p25 [Source:HGNC Symbol;Acc:HGNC:30361]	RPP25	46.716	218.799	-4.11218	2.00321e-29	83.4061	218.799	-2.4775	2.63728e-14	Y	Y	93.2852	80.2748	76.6583	41.3349	52.0343	46.7789	217.292	229.102	210.002
ENSG00000149257	ENSG00000149257	serpin family H member 1 [Source:HGNC Symbol;Acc:HGNC:1546]	SERPINH1	4904.27	20621.8	-4.12035	9.44971e-163	5165.47	20621.8	-3.91447	2.5873e-151	Y	Y	4792.81	5426.38	5277.23	4760.04	4925.91	5026.86	19518.6	22086.5	20260.3
ENSG00000139725	ENSG00000139725	ras homolog family member F, filopodia associated [Source:HGNC Symbol;Acc:HGNC:15703]	RHOF	283.731	1227.07	-4.17408	4.97927e-91	352.737	1227.07	-3.37754	9.92685e-69	Y	Y	357.214	337.741	363.256	301.309	272.952	276.931	1161.85	1335.04	1184.31
ENSG00000165685	ENSG00000165685	transmembrane protein 52B [Source:HGNC Symbol;Acc:HGNC:26438]	TMEM52B	21.1492	123.082	-4.22698	3.24477e-15	29.4716	123.082	-3.31181	3.19766e-11	Y	Y	28.4406	22.5161	37.458	15.2286	17.3448	30.8741	111.972	143.71	113.564
ENSG00000166432	ENSG00000166432	zinc finger matrin-type 1 [Source:HGNC Symbol;Acc:HGNC:29377]	ZMAT1	29.3494	160.713	-4.25199	1.75893e-15	11.9747	160.713	-7.65201	4.00514e-25	Y	Y	10.2386	11.7475	13.9379	44.5981	20.9963	22.4539	160.752	131.213	190.174
ENSG00000129757	ENSG00000129757	cyclin dependent kinase inhibitor 1C [Source:HGNC Symbol;Acc:HGNC:1786]	CDKN1C	99.4979	715.494	-4.28008	1.4238e-11	63.4331	715.494	-5.71295	1.18461e-16	Y	Y	71.6703	56.7797	61.8493	120.741	113.197	64.5549	872.495	894.541	379.446
ENSG00000231574	ENSG00000231574	long intergenic non-protein coding RNA 2015 [Source:HGNC Symbol;Acc:HGNC:52850]	LINC02015	71.5318	363.393	-4.28926	1.08609e-26	158.492	363.393	-2.13627	2.20322e-08	Y	Y	153.579	186.003	135.894	56.5635	78.5078	79.5241	415.738	404.053	270.389
ENSG00000132970	ENSG00000132970	WAS protein family member 3 [Source:HGNC Symbol;Acc:HGNC:12734]	WASF3	203.592	925.135	-4.29042	2.64648e-67	397.671	925.135	-2.26875	9.47575e-24	Y	Y	434.572	384.732	373.709	194.709	236.436	179.631	917.949	984.099	873.357
ENSG00000198133	ENSG00000198133	transmembrane protein 229B [Source:HGNC Symbol;Acc:HGNC:20130]	TMEM229B	22.8024	128.063	-4.36423	6.43703e-17	15.1501	128.063	-5.86193	1.24004e-21	Y	Y	21.6149	10.7686	13.0668	23.9307	17.3448	27.1318	137.471	132.255	114.465
ENSG00000183671	ENSG00000183671	G protein-coupled receptor 1 [Source:HGNC Symbol;Acc:HGNC:4463]	GPR1	29.9051	168.768	-4.42438	1.23029e-19	55.6287	168.768	-2.66749	9.11927e-10	Y	Y	61.4317	55.8008	49.6537	44.5981	29.2122	15.9048	166.295	162.454	177.556
ENSG00000141622	ENSG00000141622	ring finger protein 165 [Source:HGNC Symbol;Acc:HGNC:31696]	RNF165	13.2739	85.3336	-4.49967	1.19828e-12	1.9918	85.3336	-9.8571	1.89365e-15	Y	Y	2.27525	1.95792	1.74223	13.0531	14.6061	12.1625	100.886	67.6893	87.4259
ENSG00000185247	ENSG00000185247	MAGE family member A11 [Source:HGNC Symbol;Acc:HGNC:6798]	MAGEA11	0	25.0095	-4.54339	3.5658e-07	0.943013	25.0095	-3.98753	1.8303e-05	Y	Y	0	1.95792	0.871117	0	0	0	28.8245	21.8689	24.335
ENSG00000178814	ENSG00000178814	5-oxoprolinase, ATP-hydrolysing [Source:HGNC Symbol;Acc:HGNC:8149]	OPLAH	87.039	457.643	-4.54505	1.41955e-28	41.4804	457.643	-8.46779	2.19737e-49	Y	Y	51.1931	32.3057	40.9425	106.6	69.379	85.1376	472.278	544.639	356.013
ENSG00000165949	ENSG00000165949	interferon alpha inducible protein 27 [Source:HGNC Symbol;Acc:HGNC:5397]	IFI27	54.9033	285.636	-4.57461	2.42546e-35	112.253	285.636	-2.40987	3.55436e-14	Y	Y	124.001	112.58	100.178	63.0901	52.0343	49.5856	322.612	280.13	254.166
ENSG00000197943	ENSG00000197943	phospholipase C gamma 2 [Source:HGNC Symbol;Acc:HGNC:9066]	PLCG2	104.601	530.171	-4.58941	4.38081e-44	177.109	530.171	-2.82411	1.72906e-22	Y	Y	188.846	183.066	159.414	120.741	99.5041	93.5578	590.902	563.384	436.228
ENSG00000140600	ENSG00000140600	SH3 domain containing GRB2 like 3, endophilin A3 [Source:HGNC Symbol;Acc:HGNC:10832]	SH3GL3	59.513	311.333	-4.6203	3.10466e-38	109.365	311.333	-2.69293	1.23783e-18	Y	Y	129.689	93.0013	105.405	50.0369	62.076	66.426	298.222	317.619	318.158
ENSG00000260604	ENSG00000260604	novel transcript		168.267	823.948	-4.62718	1.7387e-75	203.226	823.948	-3.87792	1.89299e-61	Y	Y	201.36	219.287	189.032	154.462	170.709	179.631	773.826	897.665	800.352
ENSG00000138639	ENSG00000138639	Rho GTPase activating protein 24 [Source:HGNC Symbol;Acc:HGNC:25361]	ARHGAP24	25.7773	151.386	-4.67176	2.48341e-19	7.78953	151.386	-10.0254	2.43649e-29	Y	Y	6.82575	7.83169	8.71117	23.9307	34.6895	18.7116	164.078	153.082	136.997
ENSG00000161642	ENSG00000161642	zinc finger protein 385A [Source:HGNC Symbol;Acc:HGNC:17521]	ZNF385A	65.0381	341.61	-4.69111	1.43502e-38	62.2976	341.61	-4.8753	7.60707e-40	Y	Y	65.9822	61.6745	59.236	68.5289	63.9017	62.6837	340.351	391.557	292.922
ENSG00000251011	ENSG00000251011	TMEM108 antisense RNA 1 [Source:HGNC Symbol;Acc:HGNC:50307]	TMEM108-AS1	7.52333	70.8673	-4.72265	2.92928e-10	1.95585	70.8673	-7.34514	2.61788e-12	Y	Y	2.27525	0.978961	2.61335	3.26328	13.6932	5.61347	66.518	54.1515	91.9324
ENSG00000235109	ENSG00000235109	zinc finger and SCAN domain containing 31 [Source:HGNC Symbol;Acc:HGNC:14097]	ZSCAN31	57.6439	341.173	-4.73719	2.79826e-25	107.557	341.173	-2.79591	4.18413e-12	Y	Y	75.0832	128.244	119.343	35.8961	57.5116	79.5241	344.785	348.86	329.875
ENSG00000256804	ENSG00000256804	placenta-specific 8 (PLAC8) pseudogene		15.5584	104.441	-4.75502	8.30291e-14	0.290372	104.441	-13.5757	2.01693e-10	Y	Y	0	0	0.871117	15.2286	14.6061	16.8404	120.841	117.675	74.8077
ENSG00000177674	ENSG00000177674	angiotensin II receptor associated protein [Source:HGNC Symbol;Acc:HGNC:13539]	AGTRAP	214.697	1154.75	-4.79715	2.27498e-43	465.963	1154.75	-2.34305	8.74294e-14	Y	Y	541.509	443.469	412.91	273.028	202.66	168.404	1253.86	1255.9	954.474
ENSG00000011677	ENSG00000011677	gamma-aminobutyric acid type A receptor alpha3 subunit [Source:HGNC Symbol;Acc:HGNC:4077]	GABRA3	4.82028	54.5518	-4.84998	1.1207e-15	314.52	54.5518	5.20888	4.98655e-39	Y		333.324	288.793	321.442	4.35104	7.30306	2.80673	57.649	51.0273	54.9792
ENSG00000101096	ENSG00000101096	nuclear factor of activated T cells 2 [Source:HGNC Symbol;Acc:HGNC:7776]	NFATC2	17.7566	117.406	-4.94849	2.4691e-20	30.9687	117.406	-3.23258	8.03162e-13	Y	Y	31.8535	32.3057	28.7469	21.7552	11.8675	19.6471	117.515	116.634	118.07
ENSG00000137198	ENSG00000137198	guanosine monophosphate reductase [Source:HGNC Symbol;Acc:HGNC:4376]	GMPR	22.5518	153.39	-5.06191	1.01782e-19	12.1862	153.39	-7.70224	2.9811e-26	Y	Y	14.7891	7.83169	13.9379	14.1409	30.1251	23.3895	177.381	145.792	136.997
ENSG00000136274	ENSG00000136274	NAC alpha domain containing [Source:HGNC Symbol;Acc:HGNC:22196]	NACAD	1.2906	33.217	-5.07493	2.51953e-07	0.995901	33.217	-5.25518	5.93733e-07	Y	Y	1.13762	0.978961	0.871117	1.08776	0.912882	1.87116	33.259	31.2412	35.1506
ENSG00000244486	ENSG00000244486	scavenger receptor class F member 2 [Source:HGNC Symbol;Acc:HGNC:19869]	SCARF2	6.67104	71.4833	-5.35545	1.91461e-12	5.45447	71.4833	-5.75747	5.84827e-13	Y	Y	3.41287	6.85273	6.09782	9.78984	2.73865	7.48463	52.1058	81.2272	81.1168
ENSG00000164161	ENSG00000164161	hedgehog interacting protein [Source:HGNC Symbol;Acc:HGNC:14866]	HHIP	17.4651	134.14	-5.386	5.6919e-22	47.8004	134.14	-2.50089	2.13119e-08	Y	Y	54.606	54.8218	33.9736	16.3164	16.4319	19.6471	150.774	135.379	116.267
ENSG00000106991	ENSG00000106991	endoglin [Source:HGNC Symbol;Acc:HGNC:3349]	ENG	31.1372	207.405	-5.46598	3.24807e-31	34.3505	207.405	-5.063	4.13174e-29	Y	Y	39.8169	28.3899	34.8447	31.545	32.8638	29.0029	215.075	225.978	181.161
ENSG00000144893	ENSG00000144893	mediator complex subunit 12 like [Source:HGNC Symbol;Acc:HGNC:16050]	MED12L	2.32007	45.4966	-5.5602	6.2261e-10	5.66809	45.4966	-4.11216	2.6971e-08	Y	Y	5.68812	7.83169	3.48447	3.26328	1.82576	1.87116	37.6935	51.0273	47.7688
ENSG00000177212	ENSG00000177212	olfactory receptor family 2 subfamily T member 33 [Source:HGNC Symbol;Acc:HGNC:31255]	OR2T33	0.912882	42.6072	-5.69532	9.24429e-08	2.48371	42.6072	-4.78285	3.8641e-08	Y	Y	1.13762	1.95792	4.35559	0	2.73865	0	28.8245	45.8205	53.1766
ENSG00000120833	ENSG00000120833	suppressor of cytokine signaling 2 [Source:HGNC Symbol;Acc:HGNC:19382]	SOCS2	104.693	667.946	-5.80462	1.92426e-72	294.782	667.946	-2.20063	6.72767e-18	Y	Y	310.571	274.109	299.664	104.425	109.546	100.107	566.512	688.348	748.978
ENSG00000169946	ENSG00000169946	zinc finger protein, FOG family member 2 [Source:HGNC Symbol;Acc:HGNC:16700]	ZFPM2	18.4287	145.765	-5.83481	4.81342e-23	10.9909	145.765	-8.21442	1.52274e-27	Y	Y	12.5139	11.7475	8.71117	17.4042	19.1705	18.7116	170.73	145.792	120.774
ENSG00000261150	ENSG00000261150	epiplakin 1 [Source:HGNC Symbol;Acc:HGNC:15577]	EPPK1	17.478	193.001	-5.84674	2.26583e-18	59.7075	193.001	-2.54767	6.15905e-06	Y	Y	42.0921	57.7587	79.2717	10.8776	21.9092	19.6471	99.777	212.44	266.784
ENSG00000198185	ENSG00000198185	zinc finger protein 334 [Source:HGNC Symbol;Acc:HGNC:15806]	ZNF334	30.2524	216.745	-5.88248	6.37708e-28	1.45186	216.745	-23.0237	1.16118e-23	Y	Y	0	0	4.35559	32.6328	32.8638	25.2606	217.292	183.282	249.659
ENSG00000050438	ENSG00000050438	solute carrier family 4 member 8 [Source:HGNC Symbol;Acc:HGNC:11034]	SLC4A8	8.82372	105.63	-5.90182	5.96885e-14	2.95175	105.63	-8.89466	2.12419e-16	Y	Y	3.41287	1.95792	3.48447	3.26328	7.30306	15.9048	67.6267	117.675	131.589
ENSG00000174792	ENSG00000174792	odontogenesis associated phosphoprotein [Source:HGNC Symbol;Acc:HGNC:26300]	ODAPH	26.2003	198.817	-5.95007	2.88849e-32	42.7557	198.817	-4.00958	1.79633e-22	Y	Y	34.1287	47.9691	46.1692	18.4919	28.2993	31.8097	203.989	190.572	201.891
ENSG00000198865	ENSG00000198865	coiled-coil domain containing 152 [Source:HGNC Symbol;Acc:HGNC:34438]	CCDC152	83.9763	578.182	-6.11558	5.18864e-47	0.871117	578.182	-53.976	1.6011e-25	Y	Y	0	0	2.61335	89.1963	77.595	85.1376	624.161	448.832	661.552
ENSG00000136869	ENSG00000136869	toll like receptor 4 [Source:HGNC Symbol;Acc:HGNC:11850]	TLR4	56.6934	395.639	-6.11827	7.40839e-54	62.7815	395.639	-5.60156	5.21326e-50	Y	Y	56.8812	70.4852	60.9782	48.9492	57.5116	63.6193	392.456	358.233	436.228
ENSG00000197172	ENSG00000197172	MAGE family member A6 [Source:HGNC Symbol;Acc:HGNC:6804]	MAGEA6	49.8626	370.056	-6.34194	4.48583e-72	1181.53	370.056	3.10122	2.40546e-50	Y		1130.8	1296.14	1117.64	42.4226	54.7729	52.3924	373.61	349.902	386.657
ENSG00000167775	ENSG00000167775	CD320 molecule [Source:HGNC Symbol;Acc:HGNC:16692]	CD320	235.37	1602.02	-6.34477	1.82988e-109	666.7	1602.02	-2.33781	3.16198e-26	Y	Y	633.657	724.431	642.013	254.536	238.262	213.312	1676.25	1752.63	1377.18
ENSG00000137809	ENSG00000137809	integrin subunit alpha 11 [Source:HGNC Symbol;Acc:HGNC:6136]	ITGA11	0.971175	43.8101	-6.39979	4.31451e-08	0.943013	43.8101	-6.37738	4.96636e-08	Y	Y	0	1.95792	0.871117	1.08776	1.82576	0	42.1281	54.1515	35.1506
ENSG00000128606	ENSG00000128606	leucine rich repeat containing 17 [Source:HGNC Symbol;Acc:HGNC:16895]	LRRC17	49.1451	391.259	-6.8176	2.99545e-59	113.897	391.259	-3.21153	1.41708e-27	Y	Y	109.212	101.812	130.668	46.7737	52.9472	47.7145	424.607	396.764	352.407
ENSG00000019186	ENSG00000019186	cytochrome P450 family 24 subfamily A member 1 [Source:HGNC Symbol;Acc:HGNC:2602]	CYP24A1	40.1205	568.926	-6.83498	1.25671e-20	82.0777	568.926	-4.31495	5.68176e-12	Y	Y	98.9733	63.6325	83.6272	18.4919	41.9926	59.877	461.192	556.094	689.493
ENSG00000145287	ENSG00000145287	placenta specific 8 [Source:HGNC Symbol;Acc:HGNC:19254]	PLAC8	181.253	1397.17	-7.04374	1.80022e-81	5.14509	1397.17	-84.8245	1.23505e-93	Y	Y	4.5505	3.91584	6.96894	190.358	198.095	155.306	1609.74	1417.31	1164.48
ENSG00000100321	ENSG00000100321	synaptogyrin 1 [Source:HGNC Symbol;Acc:HGNC:11498]	SYNGR1	64.8936	545.777	-7.07743	1.01045e-52	73.9442	545.777	-6.32739	6.17409e-48	Y	Y	88.7347	69.5062	63.5916	78.3187	61.1631	55.1991	615.292	589.418	432.623
ENSG00000123453	ENSG00000123453	sarcosine dehydrogenase [Source:HGNC Symbol;Acc:HGNC:10536]	SARDH	92.1415	744.199	-7.14407	1.66906e-73	96.068	744.199	-6.85737	6.01463e-71	Y	Y	80.7713	103.77	103.663	88.1085	102.243	86.0732	700.657	875.796	656.145
ENSG00000130702	ENSG00000130702	laminin subunit alpha 5 [Source:HGNC Symbol;Acc:HGNC:6485]	LAMA5	956.826	7534.98	-7.34225	3.09372e-137	2762.96	7534.98	-2.64096	1.09014e-33	Y	Y	2708.68	3019.12	2561.08	1022.49	932.052	915.931	6246.04	8666.32	7692.58
ENSG00000138696	ENSG00000138696	bone morphogenetic protein receptor type 1B [Source:HGNC Symbol;Acc:HGNC:1077]	BMPR1B	31.1751	276.23	-7.3842	1.66447e-46	17.6576	276.23	-11.3077	7.56793e-54	Y	Y	19.3396	12.7265	20.9068	31.545	28.2993	33.6808	284.919	263.468	280.304
ENSG00000084207	ENSG00000084207	glutathione S-transferase pi 1 [Source:HGNC Symbol;Acc:HGNC:4638]	GSTP1	192.948	1542.66	-7.49967	1.95021e-124	50.8287	1542.66	-24.881	3.87272e-204	Y	Y	45.505	53.8428	53.1381	220.815	162.493	195.536	1456.74	1665.16	1506.07
ENSG00000211448	ENSG00000211448	iodothyronine deiodinase 2 [Source:HGNC Symbol;Acc:HGNC:2884]	DIO2	5.88	96.6475	-7.85944	5.30101e-20	14.4366	96.6475	-4.76617	6.53924e-15	Y	Y	12.5139	18.6003	12.1956	6.52656	4.56441	6.54905	87.5821	90.5996	111.761
ENSG00000198681	ENSG00000198681	MAGE family member A1 [Source:HGNC Symbol;Acc:HGNC:6796]	MAGEA1	0	51.4177	-8.04351	7.27124e-10	3.31402	51.4177	-5.55064	7.98607e-10	Y	Y	3.41287	3.91584	2.61335	0	0	0	34.3676	60.3997	59.4856
ENSG00000101335	ENSG00000101335	myosin light chain 9 [Source:HGNC Symbol;Acc:HGNC:15754]	MYL9	843.05	7510.2	-8.31653	1.97254e-164	992.622	7510.2	-7.10884	3.81074e-142	Y	Y	1039.79	963.297	974.78	821.259	884.583	823.309	8236.04	8194.57	6099.98
ENSG00000129038	ENSG00000129038	lysyl oxidase like 1 [Source:HGNC Symbol;Acc:HGNC:6665]	LOXL1	748.935	6721.93	-8.41277	2.66594e-176	634.278	6721.93	-9.8718	4.21311e-201	Y	Y	577.913	655.904	669.018	663.533	854.458	728.815	6318.1	7498.94	6348.74
ENSG00000118898	ENSG00000118898	periplakin [Source:HGNC Symbol;Acc:HGNC:9273]	PPL	3.40783	98.7967	-8.42658	5.64864e-16	5.86756	98.7967	-6.89557	5.68194e-15	Y	Y	6.82575	2.93688	7.84005	6.52656	1.82576	1.87116	128.602	108.303	59.4856
ENSG00000196159	ENSG00000196159	FAT atypical cadherin 4 [Source:HGNC Symbol;Acc:HGNC:23109]	FAT4	116.526	1224.59	-8.66316	1.10175e-71	539.625	1224.59	-2.15473	1.40474e-10	Y	Y	741.731	473.817	403.327	118.566	115.936	115.076	1215.06	1192.37	1266.32
ENSG00000182492	ENSG00000182492	biglycan [Source:HGNC Symbol;Acc:HGNC:1044]	BGN	14.2527	213.683	-8.89902	7.15926e-30	18.993	213.683	-7.33895	1.83757e-26	Y	Y	9.10099	31.3267	16.5512	14.1409	15.519	13.0981	210.64	258.261	172.148
ENSG00000130176	ENSG00000130176	calponin 1 [Source:HGNC Symbol;Acc:HGNC:2155]	CNN1	51.4059	649.817	-9.04737	9.78875e-46	82.831	649.817	-6.14349	8.86232e-33	Y	Y	65.9822	91.0434	91.4673	32.6328	39.2539	82.3309	541.013	754.996	653.441
ENSG00000134115	ENSG00000134115	contactin 6 [Source:HGNC Symbol;Acc:HGNC:2176]	CNTN6	5.82171	107.918	-9.14472	8.37755e-21	1.85008	107.918	-12.8958	1.49871e-17	Y	Y	0	2.93688	2.61335	5.4388	5.47729	6.54905	92.0166	128.089	103.649
ENSG00000123843	ENSG00000123843	complement component 4 binding protein beta [Source:HGNC Symbol;Acc:HGNC:1328]	C4BPB	20.9516	283.137	-9.66745	5.62102e-45	24.3507	283.137	-8.80081	6.67193e-43	Y	Y	30.7159	20.5582	21.7779	11.9654	22.822	28.0673	277.158	254.095	318.158
ENSG00000166145	ENSG00000166145	serine peptidase inhibitor, Kunitz type 1 [Source:HGNC Symbol;Acc:HGNC:11246]	SPINT1	71.2249	906.669	-9.92032	2.81214e-58	38.0606	906.669	-16.3749	4.08153e-77	Y	Y	45.505	30.3478	38.3292	100.074	59.3373	54.2635	1019.94	1026.8	673.269
ENSG00000182132	ENSG00000182132	potassium voltage-gated channel interacting protein 1 [Source:HGNC Symbol;Acc:HGNC:15521]	KCNIP1	149.789	1707.09	-10.2923	2.55703e-143	113.612	1707.09	-13.3596	9.01621e-165	Y	Y	127.414	102.791	110.632	126.18	171.622	151.564	1753.86	1864.06	1503.36
ENSG00000100228	ENSG00000100228	RAB36, member RAS oncogene family [Source:HGNC Symbol;Acc:HGNC:9775]	RAB36	2.00821	80.4868	-10.7172	9.87391e-15	0.290372	80.4868	-12.982	1.68476e-09	Y	Y	0	0	0.871117	3.26328	1.82576	0.935578	85.3648	74.979	81.1168
ENSG00000145934	ENSG00000145934	teneurin transmembrane protein 2 [Source:HGNC Symbol;Acc:HGNC:29943]	TENM2	589.415	7539.44	-11.0343	8.28027e-119	1025.95	7539.44	-6.58174	2.54725e-74	Y	Y	1073.92	976.024	1027.92	407.91	714.787	645.549	6598.59	8168.54	7851.2
ENSG00000169515	ENSG00000169515	coiled-coil domain containing 8 [Source:HGNC Symbol;Acc:HGNC:25367]	CCDC8	39.9383	533.531	-11.4032	2.48752e-88	13.691	533.531	-25.1828	7.82103e-90	Y	Y	15.9267	6.85273	18.2935	34.8083	42.9055	42.101	518.841	550.887	530.864
ENSG00000175274	ENSG00000175274	tumor protein p53 inducible protein 11 [Source:HGNC Symbol;Acc:HGNC:16842]	TP53I11	112.525	1441.35	-11.4561	2.33894e-134	42.7428	1441.35	-26.8772	3.98008e-175	Y	Y	55.7436	33.2847	39.2003	118.566	109.546	109.463	1443.44	1628.71	1251.9
ENSG00000181458	ENSG00000181458	transmembrane protein 45A [Source:HGNC Symbol;Acc:HGNC:25480]	TMEM45A	92.1383	1187.27	-11.5349	3.79962e-152	117.531	1187.27	-9.27014	1.4756e-135	Y	Y	127.414	106.707	118.472	79.4065	91.2882	105.72	1300.43	1139.26	1122.12
ENSG00000154080	ENSG00000154080	carbohydrate sulfotransferase 9 [Source:HGNC Symbol;Acc:HGNC:19898]	CHST9	9.69121	209.589	-11.6281	7.31657e-35	15.8286	209.589	-8.77776	1.5638e-31	Y	Y	15.9267	17.6213	13.9379	3.26328	15.519	10.2914	209.532	248.888	170.345
ENSG00000106772	ENSG00000106772	prune homolog 2 [Source:HGNC Symbol;Acc:HGNC:25209]	PRUNE2	48.8353	1209.71	-11.8359	3.16233e-42	471.911	1209.71	-2.17939	8.83682e-05	Y	Y	402.719	497.312	515.701	26.1062	49.2956	71.1039	958.968	1243.4	1426.75
ENSG00000145147	ENSG00000145147	slit guidance ligand 2 [Source:HGNC Symbol;Acc:HGNC:11086]	SLIT2	57.505	815.699	-12.6142	4.3734e-130	32.4973	815.699	-20.1626	8.09702e-139	Y	Y	29.5782	31.3267	36.5869	66.3533	57.5116	48.6501	783.804	853.927	809.365
ENSG00000181804	ENSG00000181804	solute carrier family 9 member A9 [Source:HGNC Symbol;Acc:HGNC:20653]	SLC9A9	2.63193	126.529	-14.4249	7.64567e-22	6.55615	126.529	-10.2934	6.74556e-25	Y	Y	6.82575	5.87376	6.96894	3.26328	1.82576	2.80673	140.796	113.51	125.28
ENSG00000197067	ENSG00000197067	olfactory receptor family 2 subfamily T member 32 pseudogene [Source:HGNC Symbol;Acc:HGNC:31254]	OR2T32P	7.67774	257.553	-16.097	9.61727e-43	29.1954	257.553	-6.89363	1.39642e-32	Y	Y	29.5782	28.3899	29.618	5.4388	7.30306	10.2914	218.401	328.033	226.226
ENSG00000137868	ENSG00000137868	stimulated by retinoic acid 6 [Source:HGNC Symbol;Acc:HGNC:30650]	STRA6	89.978	1721.79	-17.0088	9.95624e-203	59.5743	1721.79	-24.7083	1.6396e-218	Y	Y	68.2575	53.8428	56.6226	79.4065	88.5496	101.978	1543.22	1774.5	1847.66
ENSG00000169583	ENSG00000169583	chloride intracellular channel 3 [Source:HGNC Symbol;Acc:HGNC:2064]	CLIC3	0.623719	136.344	-17.1112	8.09342e-12	2.81003	136.344	-13.4776	1.42328e-20	Y	Y	1.13762	2.93688	4.35559	0	0	1.87116	114.189	188.489	106.353
ENSG00000182272	ENSG00000182272	beta-1,4-N-acetyl-galactosaminyltransferase 4 [Source:HGNC Symbol;Acc:HGNC:26315]	B4GALNT4	42.4968	904.972	-17.3172	1.05359e-135	127.019	904.972	-6.55624	1.57119e-84	Y	Y	128.552	109.644	142.863	43.5104	46.557	37.4231	895.776	1000.76	818.378
ENSG00000177462	ENSG00000177462	olfactory receptor family 2 subfamily T member 8 [Source:HGNC Symbol;Acc:HGNC:15020]	OR2T8	2.51534	257.146	-20.9404	3.46232e-29	26.1067	257.146	-6.92842	3.23192e-25	Y	Y	21.6149	24.474	32.2313	1.08776	3.65153	2.80673	164.078	273.881	333.48
ENSG00000177096	ENSG00000177096	PH domain containing endocytic trafficking adaptor 2 [Source:HGNC Symbol;Acc:HGNC:27161]	PHETA2	0.362587	142.051	-21.776	9.26131e-12	4.51146	142.051	-14.0724	1.6325e-26	Y	Y	3.41287	4.8948	5.2267	1.08776	0	0	147.448	148.917	129.787
ENSG00000169594	ENSG00000169594	basonuclin 1 [Source:HGNC Symbol;Acc:HGNC:1081]	BNC1	3.66896	234.796	-24.3658	1.32517e-34	1.61259	234.796	-29.2218	1.59758e-24	Y	Y	1.13762	1.95792	1.74223	5.4388	1.82576	3.74231	205.097	234.309	264.982
ENSG00000221867	ENSG00000221867	MAGE family member A3 [Source:HGNC Symbol;Acc:HGNC:6801]	MAGEA3	38.2518	1329.18	-28.1429	5.80999e-206	149.11	1329.18	-8.38763	1.5869e-149	Y	Y	149.029	153.697	144.605	36.9838	32.8638	44.9078	1397.99	1361.08	1228.47
ENSG00000173156	ENSG00000173156	ras homolog family member D [Source:HGNC Symbol;Acc:HGNC:670]	RHOD	1.34133	207.858	-28.4654	6.66227e-21	0.871117	207.858	-29.3897	8.81757e-18	Y	Y	0	0	2.61335	2.17552	0.912882	0.935578	227.27	212.44	183.865
ENSG00000184005	ENSG00000184005	ST6 N-acetylgalactosaminide alpha-2,6-sialyltransferase 3 [Source:HGNC Symbol;Acc:HGNC:19343]	ST6GALNAC3	1.2906	220.592	-28.6962	2.13293e-21	3.67422	220.592	-22.7817	5.69509e-33	Y	Y	5.68812	0.978961	4.35559	1.08776	0.912882	1.87116	247.225	220.771	193.779
ENSG00000073849	ENSG00000073849	ST6 beta-galactoside alpha-2,6-sialyltransferase 1 [Source:HGNC Symbol;Acc:HGNC:10860]	ST6GAL1	0	223.865	-30.8678	3.36455e-16	4.04342	223.865	-20.2237	3.13539e-32	Y	Y	1.13762	4.8948	6.09782	0	0	0	205.097	285.337	181.161
ENSG00000138622	ENSG00000138622	hyperpolarization activated cyclic nucleotide gated potassium channel 4 [Source:HGNC Symbol;Acc:HGNC:16882]	HCN4	13.7099	1109.02	-48.3152	3.82921e-125	27.6647	1109.02	-30.3366	4.77669e-136	Y	Y	34.1287	24.474	24.3913	8.70208	12.7803	19.6471	1164.07	1231.95	931.04
ENSG00000128510	ENSG00000128510	carboxypeptidase A4 [Source:HGNC Symbol;Acc:HGNC:15740]	CPA4	64.4854	4076.7	-51.1373	0	227.129	4076.7	-16.3908	3.09407e-248	Y	Y	241.176	232.014	208.197	51.1247	70.2919	72.0395	4333.65	4376.9	3519.57

## Sheet: Rank P-value
Link	ensembl_gene_id	description	hgnc_symbol	Mean_CRISPR A3	Mean_pX	FoldChange	padj	Mean_CRISPR A1	Mean_pX	FoldChange	padj	Sig in both?	In same dir?	NRY35181220_S2	NRY35181220_S5	NRY35181220_S8	NRY35181220_S3	NRY35181220_S6	NRY35181220_S9	NRY35181220_S1	NRY35181220_S4	NRY35181220_S7
ENSG00000128510	ENSG00000128510	carboxypeptidase A4 [Source:HGNC Symbol;Acc:HGNC:15740]	CPA4	64.4854	4076.7	-51.1373	0	227.129	4076.7	-16.3908	3.09407e-248	Y	Y	241.176	232.014	208.197	51.1247	70.2919	72.0395	4333.65	4376.9	3519.57
ENSG00000171004	ENSG00000171004	heparan sulfate 6-O-sulfotransferase 2 [Source:HGNC Symbol;Acc:HGNC:19133]	HS6ST2	4750.88	171.714	23.5291	4.75065e-263	2905.41	171.714	14.6362	6.03665e-190	Y	Y	2578.99	2967.23	3170	4051.9	5112.14	5088.61	141.905	174.951	198.285
ENSG00000197457	ENSG00000197457	stathmin 3 [Source:HGNC Symbol;Acc:HGNC:15926]	STMN3	3008.54	46.8767	46.261	2.98189e-253	3236.27	46.8767	49.6402	3.38076e-262	Y	Y	3467.48	3153.23	3088.11	3605.92	2788.85	2630.85	58.7576	45.8205	36.0519
ENSG00000099139	ENSG00000099139	proprotein convertase subtilisin/kexin type 5 [Source:HGNC Symbol;Acc:HGNC:8747]	PCSK5	2555.73	139.624	16.2738	8.99395e-229	697.972	139.624	4.60332	4.50361e-67	Y	Y	790.649	641.219	662.049	2246.22	2776.07	2644.88	136.362	143.71	138.8
ENSG00000221867	ENSG00000221867	MAGE family member A3 [Source:HGNC Symbol;Acc:HGNC:6801]	MAGEA3	38.2518	1329.18	-28.1429	5.80999e-206	149.11	1329.18	-8.38763	1.5869e-149	Y	Y	149.029	153.697	144.605	36.9838	32.8638	44.9078	1397.99	1361.08	1228.47
ENSG00000137868	ENSG00000137868	stimulated by retinoic acid 6 [Source:HGNC Symbol;Acc:HGNC:30650]	STRA6	89.978	1721.79	-17.0088	9.95624e-203	59.5743	1721.79	-24.7083	1.6396e-218	Y	Y	68.2575	53.8428	56.6226	79.4065	88.5496	101.978	1543.22	1774.5	1847.66
ENSG00000129038	ENSG00000129038	lysyl oxidase like 1 [Source:HGNC Symbol;Acc:HGNC:6665]	LOXL1	748.935	6721.93	-8.41277	2.66594e-176	634.278	6721.93	-9.8718	4.21311e-201	Y	Y	577.913	655.904	669.018	663.533	854.458	728.815	6318.1	7498.94	6348.74
ENSG00000165512	ENSG00000165512	zinc finger protein 22 [Source:HGNC Symbol;Acc:HGNC:13012]	ZNF22	1018.94	38.0207	20.9411	2.88656e-169	854.164	38.0207	17.6281	6.08136e-151	Y	Y	806.576	851.696	904.22	927.859	1032.47	1096.5	44.3454	29.1585	40.5584
ENSG00000101335	ENSG00000101335	myosin light chain 9 [Source:HGNC Symbol;Acc:HGNC:15754]	MYL9	843.05	7510.2	-8.31653	1.97254e-164	992.622	7510.2	-7.10884	3.81074e-142	Y	Y	1039.79	963.297	974.78	821.259	884.583	823.309	8236.04	8194.57	6099.98
ENSG00000149257	ENSG00000149257	serpin family H member 1 [Source:HGNC Symbol;Acc:HGNC:1546]	SERPINH1	4904.27	20621.8	-4.12035	9.44971e-163	5165.47	20621.8	-3.91447	2.5873e-151	Y	Y	4792.81	5426.38	5277.23	4760.04	4925.91	5026.86	19518.6	22086.5	20260.3
ENSG00000164099	ENSG00000164099	serine protease 12 [Source:HGNC Symbol;Acc:HGNC:9477]	PRSS12	993.774	42.699	18.4016	5.28265e-161	923.065	42.699	17.1246	3.77644e-153	Y	Y	862.319	917.286	989.589	891.963	1082.68	1006.68	34.3676	46.8618	46.8675
ENSG00000134769	ENSG00000134769	dystrobrevin alpha [Source:HGNC Symbol;Acc:HGNC:3057]	DTNA	1624.73	10.7289	73.224	1.58945e-159	1527.43	10.7289	68.8518	1.89226e-155	Y	Y	1568.78	1536.97	1476.54	1599.01	1666.92	1608.26	6.6518	15.6206	9.91427
ENSG00000163359	ENSG00000163359	collagen type VI alpha 3 chain [Source:HGNC Symbol;Acc:HGNC:2213]	COL6A3	105383	23658.4	4.3502	2.34032e-158	80962.3	23658.4	3.3559	2.26721e-107	Y	Y	85976	77345.7	79565.2	116100	100959	99089	23313.5	24531.7	23130
ENSG00000181458	ENSG00000181458	transmembrane protein 45A [Source:HGNC Symbol;Acc:HGNC:25480]	TMEM45A	92.1383	1187.27	-11.5349	3.79962e-152	117.531	1187.27	-9.27014	1.4756e-135	Y	Y	127.414	106.707	118.472	79.4065	91.2882	105.72	1300.43	1139.26	1122.12
ENSG00000182132	ENSG00000182132	potassium voltage-gated channel interacting protein 1 [Source:HGNC Symbol;Acc:HGNC:15521]	KCNIP1	149.789	1707.09	-10.2923	2.55703e-143	113.612	1707.09	-13.3596	9.01621e-165	Y	Y	127.414	102.791	110.632	126.18	171.622	151.564	1753.86	1864.06	1503.36
ENSG00000130702	ENSG00000130702	laminin subunit alpha 5 [Source:HGNC Symbol;Acc:HGNC:6485]	LAMA5	956.826	7534.98	-7.34225	3.09372e-137	2762.96	7534.98	-2.64096	1.09014e-33	Y	Y	2708.68	3019.12	2561.08	1022.49	932.052	915.931	6246.04	8666.32	7692.58
ENSG00000182272	ENSG00000182272	beta-1,4-N-acetyl-galactosaminyltransferase 4 [Source:HGNC Symbol;Acc:HGNC:26315]	B4GALNT4	42.4968	904.972	-17.3172	1.05359e-135	127.019	904.972	-6.55624	1.57119e-84	Y	Y	128.552	109.644	142.863	43.5104	46.557	37.4231	895.776	1000.76	818.378
ENSG00000175274	ENSG00000175274	tumor protein p53 inducible protein 11 [Source:HGNC Symbol;Acc:HGNC:16842]	TP53I11	112.525	1441.35	-11.4561	2.33894e-134	42.7428	1441.35	-26.8772	3.98008e-175	Y	Y	55.7436	33.2847	39.2003	118.566	109.546	109.463	1443.44	1628.71	1251.9
ENSG00000135525	ENSG00000135525	microtubule associated protein 7 [Source:HGNC Symbol;Acc:HGNC:6869]	MAP7	1129.78	104.735	9.60248	4.03526e-134	1055.66	104.735	8.99025	2.54963e-126	Y	Y	1142.17	1007.35	1017.46	1273.77	1120.11	995.455	117.515	102.055	94.6363
ENSG00000126970	ENSG00000126970	zinc finger C4H2-type containing [Source:HGNC Symbol;Acc:HGNC:24931]	ZC4H2	787.504	26.237	21.7757	1.44647e-132	329.363	26.237	9.32	7.79166e-71	Y	Y	374.278	305.436	308.375	827.785	775.037	759.689	22.1727	24.993	31.5454
ENSG00000144583	ENSG00000144583	membrane associated ring-CH-type finger 4 [Source:HGNC Symbol;Acc:HGNC:29269]	MARCH4	998.608	108.091	8.32649	1.41187e-130	720.501	108.091	6.05432	2.31565e-93	Y	Y	748.557	719.536	693.409	1031.2	1057.12	907.511	94.2339	102.055	127.984
ENSG00000145147	ENSG00000145147	slit guidance ligand 2 [Source:HGNC Symbol;Acc:HGNC:11086]	SLIT2	57.505	815.699	-12.6142	4.3734e-130	32.4973	815.699	-20.1626	8.09702e-139	Y	Y	29.5782	31.3267	36.5869	66.3533	57.5116	48.6501	783.804	853.927	809.365
ENSG00000138622	ENSG00000138622	hyperpolarization activated cyclic nucleotide gated potassium channel 4 [Source:HGNC Symbol;Acc:HGNC:16882]	HCN4	13.7099	1109.02	-48.3152	3.82921e-125	27.6647	1109.02	-30.3366	4.77669e-136	Y	Y	34.1287	24.474	24.3913	8.70208	12.7803	19.6471	1164.07	1231.95	931.04
ENSG00000084207	ENSG00000084207	glutathione S-transferase pi 1 [Source:HGNC Symbol;Acc:HGNC:4638]	GSTP1	192.948	1542.66	-7.49967	1.95021e-124	50.8287	1542.66	-24.881	3.87272e-204	Y	Y	45.505	53.8428	53.1381	220.815	162.493	195.536	1456.74	1665.16	1506.07
ENSG00000170745	ENSG00000170745	potassium voltage-gated channel modifier subfamily S member 3 [Source:HGNC Symbol;Acc:HGNC:6302]	KCNS3	1887.04	346.314	5.20901	3.01428e-121	1367.81	346.314	3.80444	1.20789e-78	Y	Y	1280.96	1384.25	1438.21	1977.55	1986.43	1697.14	348.111	371.771	319.059
ENSG00000145934	ENSG00000145934	teneurin transmembrane protein 2 [Source:HGNC Symbol;Acc:HGNC:29943]	TENM2	589.415	7539.44	-11.0343	8.28027e-119	1025.95	7539.44	-6.58174	2.54725e-74	Y	Y	1073.92	976.024	1027.92	407.91	714.787	645.549	6598.59	8168.54	7851.2
ENSG00000138792	ENSG00000138792	glutamyl aminopeptidase [Source:HGNC Symbol;Acc:HGNC:3355]	ENPEP	1258.64	268.04	4.52184	1.74334e-118	923.494	268.04	3.33769	3.36848e-74	Y	Y	891.897	897.707	980.878	1281.38	1267.99	1226.54	248.334	279.088	276.698
ENSG00000147027	ENSG00000147027	transmembrane protein 47 [Source:HGNC Symbol;Acc:HGNC:18515]	TMEM47	938.226	59.067	12.8425	1.11113e-116	604.55	59.067	8.41922	3.25129e-81	Y	Y	614.317	591.292	608.04	891.963	1087.24	835.471	39.9108	62.4825	74.8077
ENSG00000198914	ENSG00000198914	POU class 3 homeobox 3 [Source:HGNC Symbol;Acc:HGNC:9216]	POU3F3	1251.63	237.408	5.03977	4.77981e-114	1150.51	237.408	4.64028	2.99843e-102	Y	Y	1085.29	1172.8	1193.43	1154.11	1322.77	1278	243.899	252.013	216.311
ENSG00000092421	ENSG00000092421	semaphorin 6A [Source:HGNC Symbol;Acc:HGNC:10738]	SEMA6A	1045.52	78.5037	11.1835	6.20274e-114	536.532	78.5037	5.89672	3.19314e-61	Y	Y	490.316	607.935	511.346	907.192	1095.46	1133.92	63.1921	74.979	97.3401
ENSG00000006042	ENSG00000006042	transmembrane protein 98 [Source:HGNC Symbol;Acc:HGNC:24529]	TMEM98	2983.29	544.582	5.2163	1.11012e-113	1955.94	544.582	3.45807	1.24304e-63	Y	Y	1667.76	2051.9	2148.17	2773.79	3110.19	3065.89	516.623	559.218	557.903
ENSG00000167775	ENSG00000167775	CD320 molecule [Source:HGNC Symbol;Acc:HGNC:16692]	CD320	235.37	1602.02	-6.34477	1.82988e-109	666.7	1602.02	-2.33781	3.16198e-26	Y	Y	633.657	724.431	642.013	254.536	238.262	213.312	1676.25	1752.63	1377.18
ENSG00000170485	ENSG00000170485	neuronal PAS domain protein 2 [Source:HGNC Symbol;Acc:HGNC:7895]	NPAS2	1185.99	32.3125	23.1134	5.61925e-107	873.004	32.3125	17.3864	3.13884e-89	Y	Y	961.293	830.159	827.561	1560.94	1108.24	888.799	44.3454	29.1585	23.4337
ENSG00000176658	ENSG00000176658	myosin ID [Source:HGNC Symbol;Acc:HGNC:7598]	MYO1D	5493.99	786.438	6.45891	1.45184e-104	3778.67	786.438	4.50384	6.10076e-68	Y	Y	4078.38	3537.96	3719.67	6529.82	5515.63	4436.51	727.264	822.686	809.365
ENSG00000117602	ENSG00000117602	RCAN family member 3 [Source:HGNC Symbol;Acc:HGNC:3042]	RCAN3	1517.78	256.93	5.54311	2.84614e-102	1550.86	256.93	5.66126	8.47181e-105	Y	Y	1660.93	1504.66	1487	1720.84	1522.69	1309.81	269.398	249.93	251.462
ENSG00000131018	ENSG00000131018	spectrin repeat containing nuclear envelope protein 1 [Source:HGNC Symbol;Acc:HGNC:17089]	SYNE1	1507.48	264.791	5.34056	1.37859e-95	1237.52	264.791	4.40564	1.5975e-74	Y	Y	1406.1	1167.9	1138.55	1626.2	1555.55	1340.68	261.638	255.137	277.6
ENSG00000005249	ENSG00000005249	protein kinase cAMP-dependent type II regulatory subunit beta [Source:HGNC Symbol;Acc:HGNC:9392]	PRKAR2B	609.281	10.7495	28.7358	2.17284e-94	849.689	10.7495	39.7761	3.78167e-111	Y	Y	823.64	851.696	873.731	676.586	619.847	531.408	9.9777	11.4551	10.8156
ENSG00000085563	ENSG00000085563	ATP binding cassette subfamily B member 1 [Source:HGNC Symbol;Acc:HGNC:40]	ABCB1	1550.28	303.409	4.84119	9.67722e-94	1375.09	303.409	4.3115	3.40125e-80	Y	Y	1175.17	1459.63	1490.48	1572.9	1584.76	1493.18	310.417	278.047	321.763
ENSG00000100505	ENSG00000100505	tripartite motif containing 9 [Source:HGNC Symbol;Acc:HGNC:16288]	TRIM9	2465.42	590.797	4.02429	1.86486e-93	3359.87	590.797	5.45152	1.68885e-139	Y	Y	3302.52	3256.02	3521.06	2777.05	2435.57	2183.64	609.749	589.418	573.225
ENSG00000109321	ENSG00000109321	amphiregulin [Source:HGNC Symbol;Acc:HGNC:651]	AREG	1195.39	127.49	8.11926	1.64542e-92	1277.3	127.49	8.65264	3.26044e-98	Y	Y	1184.27	1339.22	1308.42	1192.18	1210.48	1183.51	127.493	86.4341	168.543
ENSG00000139725	ENSG00000139725	ras homolog family member F, filopodia associated [Source:HGNC Symbol;Acc:HGNC:15703]	RHOF	283.731	1227.07	-4.17408	4.97927e-91	352.737	1227.07	-3.37754	9.92685e-69	Y	Y	357.214	337.741	363.256	301.309	272.952	276.931	1161.85	1335.04	1184.31
ENSG00000106538	ENSG00000106538	retinoic acid receptor responder 2 [Source:HGNC Symbol;Acc:HGNC:9868]	RARRES2	2773.14	64.8184	22.2454	2.67917e-89	4904.63	64.8184	36.8564	1.05039e-118	Y	Y	5482.21	4890.89	4340.78	3750.6	2542.38	2026.46	69.8439	68.7307	55.8805
ENSG00000169515	ENSG00000169515	coiled-coil domain containing 8 [Source:HGNC Symbol;Acc:HGNC:25367]	CCDC8	39.9383	533.531	-11.4032	2.48752e-88	13.691	533.531	-25.1828	7.82103e-90	Y	Y	15.9267	6.85273	18.2935	34.8083	42.9055	42.101	518.841	550.887	530.864
ENSG00000134709	ENSG00000134709	hook microtubule tethering protein 1 [Source:HGNC Symbol;Acc:HGNC:19884]	HOOK1	549.714	47.3627	9.61998	3.30781e-88	284.654	47.3627	5.09548	2.42212e-45	Y	Y	327.636	246.698	279.629	554.757	574.203	520.181	45.454	41.655	54.9792
ENSG00000177494	ENSG00000177494	zinc finger BED-type containing 2 [Source:HGNC Symbol;Acc:HGNC:20710]	ZBED2	478.246	41.4656	9.43967	2.26335e-87	476.858	41.4656	9.41978	3.82156e-87	Y	Y	431.16	484.586	514.83	443.806	482.915	508.019	44.3454	32.2826	47.7688
ENSG00000123892	ENSG00000123892	RAB38, member RAS oncogene family [Source:HGNC Symbol;Acc:HGNC:9776]	RAB38	497.638	31.2973	12.4055	1.83e-86	220.866	31.2973	5.69008	1.28973e-41	Y	Y	234.351	218.308	209.939	553.67	454.615	484.629	41.0195	31.2412	21.6311
ENSG00000112379	ENSG00000112379	ARFGEF family member 3 [Source:HGNC Symbol;Acc:HGNC:21213]	ARFGEF3	649.012	13.4331	26.8893	1.33933e-85	110.709	13.4331	5.11741	5.86199e-24	Y	Y	129.689	90.0644	112.374	748.379	670.055	528.602	9.9777	17.7034	12.6182
ENSG00000138395	ENSG00000138395	cyclin dependent kinase 15 [Source:HGNC Symbol;Acc:HGNC:14434]	CDK15	2344.06	725.477	3.1599	5.15063e-85	1995.66	725.477	2.69885	6.50823e-63	Y	Y	1945.34	1855.13	2186.5	2419.18	2308.68	2304.33	709.526	720.631	746.274
ENSG00000155265	ENSG00000155265	golgin A7 family member B [Source:HGNC Symbol;Acc:HGNC:31668]	GOLGA7B	567.596	14.4763	22.4963	6.15807e-85	275.484	14.4763	11.3098	8.66068e-54	Y	Y	301.47	281.941	243.042	662.446	527.646	512.697	7.76044	23.9516	11.7169
ENSG00000088538	ENSG00000088538	dedicator of cytokinesis 3 [Source:HGNC Symbol;Acc:HGNC:2989]	DOCK3	447.458	51.3196	7.56209	2.49423e-82	352.032	51.3196	5.98866	5.20302e-64	Y	Y	366.315	338.72	351.06	468.824	462.831	410.719	50.9972	55.1928	47.7688
ENSG00000168685	ENSG00000168685	interleukin 7 receptor [Source:HGNC Symbol;Acc:HGNC:6024]	IL7R	1104.09	4525.26	-3.94726	1.29724e-81	662.221	4525.26	-6.49015	3.90583e-146	Y	Y	734.905	648.072	603.684	946.351	1173.05	1192.86	4681.76	4301.92	4592.11
ENSG00000145287	ENSG00000145287	placenta specific 8 [Source:HGNC Symbol;Acc:HGNC:19254]	PLAC8	181.253	1397.17	-7.04374	1.80022e-81	5.14509	1397.17	-84.8245	1.23505e-93	Y	Y	4.5505	3.91584	6.96894	190.358	198.095	155.306	1609.74	1417.31	1164.48
ENSG00000134202	ENSG00000134202	glutathione S-transferase mu 3 [Source:HGNC Symbol;Acc:HGNC:4635]	GSTM3	1645.18	4472.44	-2.68065	1.92669e-81	1825.48	4472.44	-2.42076	7.49702e-66	Y	Y	1886.18	1790.52	1799.73	1605.53	1644.1	1685.91	4635.2	4655.98	4126.14
ENSG00000166033	ENSG00000166033	HtrA serine peptidase 1 [Source:HGNC Symbol;Acc:HGNC:9476]	HTRA1	5474.62	968.569	5.26429	5.37687e-80	3868.15	968.569	3.77012	5.19316e-51	Y	Y	3821.28	4014.72	3768.45	6261.14	5438.04	4724.67	1097.55	1033.04	775.116
ENSG00000180537	ENSG00000180537	ring finger protein 182 [Source:HGNC Symbol;Acc:HGNC:28522]	RNF182	576.192	94.5221	5.54472	4.68193e-76	563.986	94.5221	5.42427	5.20569e-74	Y	Y	568.812	556.05	567.097	519.949	645.408	563.218	86.4734	91.6409	105.452
ENSG00000260604	ENSG00000260604	novel transcript		168.267	823.948	-4.62718	1.7387e-75	203.226	823.948	-3.87792	1.89299e-61	Y	Y	201.36	219.287	189.032	154.462	170.709	179.631	773.826	897.665	800.352
ENSG00000105514	ENSG00000105514	RAB3D, member RAS oncogene family [Source:HGNC Symbol;Acc:HGNC:9779]	RAB3D	442.901	16.2718	17.0339	7.52398e-75	218.14	16.2718	8.69804	3.08638e-45	Y	Y	228.662	203.624	222.135	530.827	420.839	377.038	19.9554	13.5379	15.3221
ENSG00000154639	ENSG00000154639	CXADR, Ig-like cell adhesion molecule [Source:HGNC Symbol;Acc:HGNC:2559]	CXADR	1165.26	116.573	8.27599	7.90282e-75	1156.86	116.573	8.21924	2.54725e-74	Y	Y	1122.84	1155.17	1192.56	1111.69	1307.25	1076.85	83.1475	98.9306	167.641
ENSG00000177614	ENSG00000177614	piggyBac transposable element derived 5 [Source:HGNC Symbol;Acc:HGNC:19405]	PGBD5	714.713	70.8384	8.49089	6.08665e-74	200.051	70.8384	2.55241	2.7516e-14	Y	Y	207.048	191.876	201.228	851.716	699.268	593.157	59.8662	89.5582	63.0908
ENSG00000123453	ENSG00000123453	sarcosine dehydrogenase [Source:HGNC Symbol;Acc:HGNC:10536]	SARDH	92.1415	744.199	-7.14407	1.66906e-73	96.068	744.199	-6.85737	6.01463e-71	Y	Y	80.7713	103.77	103.663	88.1085	102.243	86.0732	700.657	875.796	656.145
ENSG00000144218	ENSG00000144218	AF4/FMR2 family member 3 [Source:HGNC Symbol;Acc:HGNC:6473]	AFF3	716.568	64.6593	8.95723	3.79695e-73	577.689	64.6593	7.31521	2.63898e-60	Y	Y	568.812	604.998	559.257	905.016	700.18	544.506	60.9749	70.8135	62.1895
ENSG00000143512	ENSG00000143512	HHIP like 2 [Source:HGNC Symbol;Acc:HGNC:25842]	HHIPL2	856.85	122.585	6.21091	1.21386e-72	1525.25	122.585	10.8008	7.86251e-124	Y	Y	1672.31	1510.54	1392.92	987.686	870.889	711.975	138.579	129.13	100.044
ENSG00000077585	ENSG00000077585	G protein-coupled receptor 137B [Source:HGNC Symbol;Acc:HGNC:11862]	GPR137B	599.179	124.251	4.51438	1.6979e-72	672.012	124.251	5.04619	6.05764e-84	Y	Y	687.125	692.125	636.787	604.794	644.495	548.249	118.624	127.048	127.083
ENSG00000120833	ENSG00000120833	suppressor of cytokine signaling 2 [Source:HGNC Symbol;Acc:HGNC:19382]	SOCS2	104.693	667.946	-5.80462	1.92426e-72	294.782	667.946	-2.20063	6.72767e-18	Y	Y	310.571	274.109	299.664	104.425	109.546	100.107	566.512	688.348	748.978
ENSG00000197172	ENSG00000197172	MAGE family member A6 [Source:HGNC Symbol;Acc:HGNC:6804]	MAGEA6	49.8626	370.056	-6.34194	4.48583e-72	1181.53	370.056	3.10122	2.40546e-50	Y		1130.8	1296.14	1117.64	42.4226	54.7729	52.3924	373.61	349.902	386.657
ENSG00000196159	ENSG00000196159	FAT atypical cadherin 4 [Source:HGNC Symbol;Acc:HGNC:23109]	FAT4	116.526	1224.59	-8.66316	1.10175e-71	539.625	1224.59	-2.15473	1.40474e-10	Y	Y	741.731	473.817	403.327	118.566	115.936	115.076	1215.06	1192.37	1266.32
ENSG00000138061	ENSG00000138061	cytochrome P450 family 1 subfamily B member 1 [Source:HGNC Symbol;Acc:HGNC:2597]	CYP1B1	2236.97	677.477	3.20527	2.54844e-67	2639.25	677.477	3.77017	1.24252e-87	Y	Y	2308.24	2889.89	2719.63	2202.71	2197.31	2310.88	665.18	649.818	717.433
ENSG00000132970	ENSG00000132970	WAS protein family member 3 [Source:HGNC Symbol;Acc:HGNC:12734]	WASF3	203.592	925.135	-4.29042	2.64648e-67	397.671	925.135	-2.26875	9.47575e-24	Y	Y	434.572	384.732	373.709	194.709	236.436	179.631	917.949	984.099	873.357
ENSG00000143126	ENSG00000143126	cadherin EGF LAG seven-pass G-type receptor 2 [Source:HGNC Symbol;Acc:HGNC:3231]	CELSR2	2190	6535.85	-2.91918	7.63998e-66	3000.64	6535.85	-2.14547	7.39533e-34	Y	Y	3171.7	3011.28	2818.94	2154.85	2213.74	2201.42	5958.91	7359.39	6289.25
ENSG00000115365	ENSG00000115365	LanC like 1 [Source:HGNC Symbol;Acc:HGNC:6508]	LANCL1	5812.85	1994.5	2.85364	2.02076e-65	4365.14	1994.5	2.15444	5.30284e-35	Y	Y	4591.45	4160.58	4343.39	6244.83	6002.2	5191.52	2089.77	1870.31	2023.41
ENSG00000106688	ENSG00000106688	solute carrier family 1 member 1 [Source:HGNC Symbol;Acc:HGNC:10939]	SLC1A1	1689.1	288.936	5.32834	2.60409e-65	1424.94	288.936	4.52946	3.59027e-53	Y	Y	1593.81	1302.02	1378.98	1980.81	1692.48	1394.01	311.526	315.536	239.745
ENSG00000179314	ENSG00000179314	WSC domain containing 1 [Source:HGNC Symbol;Acc:HGNC:29060]	WSCD1	5647.61	1315.7	4.06425	4.71904e-63	4682.01	1315.7	3.39193	7.8491e-48	Y	Y	3878.16	5442.04	4725.81	5031.98	5756.63	6154.23	1218.39	1323.59	1405.12
ENSG00000115919	ENSG00000115919	kynureninase [Source:HGNC Symbol;Acc:HGNC:6469]	KYNU	613.227	124.477	4.59735	2.2373e-62	385.475	124.477	2.9343	1.75196e-30	Y	Y	349.251	431.722	375.452	575.425	628.063	636.193	139.688	122.882	110.86
ENSG00000046889	ENSG00000046889	phosphatidylinositol-3,4,5-trisphosphate dependent Rac exchange factor 2 [Source:HGNC Symbol;Acc:HGNC:22950]	PREX2	1913.04	527.188	3.49244	2.60288e-62	1894.89	527.188	3.46015	2.25392e-61	Y	Y	1953.3	1980.44	1750.95	2091.76	1975.48	1671.88	559.86	546.722	474.984
ENSG00000164181	ENSG00000164181	ELOVL fatty acid elongase 7 [Source:HGNC Symbol;Acc:HGNC:26292]	ELOVL7	511.604	107.927	4.38661	5.44911e-61	527.378	107.927	4.51532	1.90558e-63	Y	Y	523.307	525.702	533.124	482.965	554.119	497.728	98.6684	98.9306	126.182
ENSG00000145362	ENSG00000145362	ankyrin 2 [Source:HGNC Symbol;Acc:HGNC:493]	ANK2	292.506	17.847	10.8837	2.97712e-60	617.134	17.847	22.2304	2.96495e-98	Y	Y	664.373	590.313	596.715	254.536	343.244	279.738	19.9554	21.8689	11.7169
ENSG00000128606	ENSG00000128606	leucine rich repeat containing 17 [Source:HGNC Symbol;Acc:HGNC:16895]	LRRC17	49.1451	391.259	-6.8176	2.99545e-59	113.897	391.259	-3.21153	1.41708e-27	Y	Y	109.212	101.812	130.668	46.7737	52.9472	47.7145	424.607	396.764	352.407
ENSG00000115414	ENSG00000115414	fibronectin 1 [Source:HGNC Symbol;Acc:HGNC:3778]	FN1	1.0503e+06	392988	2.62481	4.65247e-59	1.17835e+06	392988	2.93867	1.08819e-73	Y	Y	1.19987e+06	1.19885e+06	1.13632e+06	1.11901e+06	1.06502e+06	966864	397874	427165	353923
ENSG00000166145	ENSG00000166145	serine peptidase inhibitor, Kunitz type 1 [Source:HGNC Symbol;Acc:HGNC:11246]	SPINT1	71.2249	906.669	-9.92032	2.81214e-58	38.0606	906.669	-16.3749	4.08153e-77	Y	Y	45.505	30.3478	38.3292	100.074	59.3373	54.2635	1019.94	1026.8	673.269
ENSG00000047315	ENSG00000047315	RNA polymerase II subunit B [Source:HGNC Symbol;Acc:HGNC:9188]	POLR2B	5096.31	10268.2	-2.00149	3.50122e-58	4636.61	10268.2	-2.19776	1.36614e-74	Y	Y	4462.9	4789.08	4657.86	4936.25	5173.3	5179.36	10108.5	10013.9	10682.2
ENSG00000168243	ENSG00000168243	G protein subunit gamma 4 [Source:HGNC Symbol;Acc:HGNC:4407]	GNG4	3162.93	993.575	3.08871	5.21496e-58	5846.87	993.575	5.62668	4.44177e-137	Y	Y	6375.25	5767.06	5398.31	3269.81	3341.15	2877.84	1039.9	1061.16	879.666
ENSG00000140379	ENSG00000140379	BCL2 related protein A1 [Source:HGNC Symbol;Acc:HGNC:991]	BCL2A1	429.672	90.4769	4.41853	1.02112e-57	263.614	90.4769	2.75478	3.95551e-26	Y	Y	252.553	260.404	277.886	439.455	411.71	437.851	93.1252	92.6823	85.6233
ENSG00000065675	ENSG00000065675	protein kinase C theta [Source:HGNC Symbol;Acc:HGNC:9410]	PRKCQ	294.636	29.0576	8.08201	1.89936e-57	189.562	29.0576	5.30832	8.70639e-37	Y	Y	171.781	202.645	194.259	302.397	280.255	301.256	33.259	32.2826	21.6311
ENSG00000120885	ENSG00000120885	clusterin [Source:HGNC Symbol;Acc:HGNC:2095]	CLU	2657.69	875.867	2.95107	5.62134e-57	2836.87	875.867	3.14639	5.68681e-64	Y	Y	2516.42	3021.07	2973.12	2549.71	2679.31	2744.05	782.695	930.989	913.916
ENSG00000103067	ENSG00000103067	epithelial splicing regulatory protein 2 [Source:HGNC Symbol;Acc:HGNC:26152]	ESRP2	294.846	33.0787	7.10671	1.88587e-56	429.223	33.0787	10.2184	4.75428e-79	Y	Y	373.141	441.511	473.017	287.169	282.081	315.29	31.0417	31.2412	36.9532
ENSG00000173698	ENSG00000173698	adhesion G protein-coupled receptor G2 [Source:HGNC Symbol;Acc:HGNC:4516]	ADGRG2	419.685	8.11625	20.1948	2.4978e-56	489.301	8.11625	23.306	5.77424e-61	Y	Y	489.178	486.544	492.181	573.249	375.194	310.612	5.54317	12.4965	6.30908
ENSG00000119042	ENSG00000119042	SATB homeobox 2 [Source:HGNC Symbol;Acc:HGNC:21637]	SATB2	1874.15	766.336	2.40947	7.61232e-56	1660.99	766.336	2.13891	1.65613e-41	Y	Y	1588.12	1740.59	1654.25	1770.87	1927.09	1924.48	757.197	741.459	800.352
ENSG00000152128	ENSG00000152128	transmembrane protein 163 [Source:HGNC Symbol;Acc:HGNC:25380]	TMEM163	562.123	93.217	5.39307	2.0962e-55	288.302	93.217	2.85712	2.517e-21	Y	Y	274.167	293.688	297.051	645.041	563.248	478.08	113.081	79.1444	87.4259
ENSG00000091129	ENSG00000091129	neuronal cell adhesion molecule [Source:HGNC Symbol;Acc:HGNC:7994]	NRCAM	1615.5	74.1071	12.4416	2.41284e-55	2147.21	74.1071	15.942	4.46749e-66	Y	Y	2367.4	2135.11	1939.11	2220.12	1458.79	1167.6	89.7993	73.9376	58.5843
ENSG00000187123	ENSG00000187123	LY6/PLAUR domain containing 6 [Source:HGNC Symbol;Acc:HGNC:28751]	LYPD6	291.374	8.96929	16.1617	7.66266e-55	355.255	8.96929	19.569	1.63212e-61	Y	Y	360.627	335.784	369.354	335.03	293.035	246.057	11.0863	10.4137	5.40779
ENSG00000144481	ENSG00000144481	transient receptor potential cation channel subfamily M member 8 [Source:HGNC Symbol;Acc:HGNC:17961]	TRPM8	413.898	67.983	5.41753	1.82563e-54	201.086	67.983	2.71011	1.10481e-18	Y	Y	218.424	187.96	196.872	429.665	453.702	358.326	69.8439	65.6066	68.4986
ENSG00000136869	ENSG00000136869	toll like receptor 4 [Source:HGNC Symbol;Acc:HGNC:11850]	TLR4	56.6934	395.639	-6.11827	7.40839e-54	62.7815	395.639	-5.60156	5.21326e-50	Y	Y	56.8812	70.4852	60.9782	48.9492	57.5116	63.6193	392.456	358.233	436.228
ENSG00000100461	ENSG00000100461	RNA binding motif protein 23 [Source:HGNC Symbol;Acc:HGNC:20155]	RBM23	235.986	871.639	-3.55644	5.44277e-53	15.577	871.639	-34.9631	1.17671e-131	Y	Y	15.9267	10.7686	20.0357	208.85	245.565	253.542	894.667	882.044	838.207
ENSG00000133943	ENSG00000133943	D-glutamate cyclase [Source:HGNC Symbol;Acc:HGNC:20498]	DGLUCY	1088.92	2402.62	-2.1835	6.60248e-53	1083.24	2402.62	-2.19405	1.94631e-53	Y	Y	1062.54	1105.25	1081.93	1094.29	1050.73	1121.76	2410.17	2506.59	2291.1
ENSG00000100321	ENSG00000100321	synaptogyrin 1 [Source:HGNC Symbol;Acc:HGNC:11498]	SYNGR1	64.8936	545.777	-7.07743	1.01045e-52	73.9442	545.777	-6.32739	6.17409e-48	Y	Y	88.7347	69.5062	63.5916	78.3187	61.1631	55.1991	615.292	589.418	432.623
ENSG00000264230	ENSG00000264230	annexin A8 like 1 [Source:HGNC Symbol;Acc:HGNC:23334]	ANXA8L1	351.506	31.2387	8.45748	1.80242e-52	203.8	31.2387	5.07392	9.97451e-31	Y	Y	222.974	188.939	199.486	403.559	346.895	304.063	19.9554	45.8205	27.9402
ENSG00000260896	ENSG00000260896	androgen receptor regulated long noncoding RNA 1 [Source:HGNC Symbol;Acc:HGNC:53032]	ARLNC1	424.472	15.1868	15.2403	4.9872e-52	54.8834	15.1868	2.47704	2.90756e-07	Y	Y	75.0832	46.0112	43.5559	513.423	401.668	358.326	8.86907	11.4551	25.2363
ENSG00000127863	ENSG00000127863	TNF receptor superfamily member 19 [Source:HGNC Symbol;Acc:HGNC:11915]	TNFRSF19	984.913	338.649	2.83074	5.69689e-52	706.703	338.649	2.04792	2.65576e-24	Y	Y	660.96	688.209	770.939	984.422	941.181	1029.14	334.807	333.24	347.901
ENSG00000144476	ENSG00000144476	atypical chemokine receptor 3 [Source:HGNC Symbol;Acc:HGNC:23692]	ACKR3	539.863	95.9397	5.06731	1.96441e-51	232.098	95.9397	2.2722	3.64398e-13	Y	Y	203.635	265.298	227.362	587.39	554.119	478.08	94.2339	112.468	81.1168
ENSG00000134755	ENSG00000134755	desmocollin 2 [Source:HGNC Symbol;Acc:HGNC:3036]	DSC2	207.998	10.9085	10.6675	5.54171e-51	1631.48	10.9085	79.8536	1.49835e-150	Y	Y	1558.55	1687.73	1648.15	200.148	224.569	199.278	18.8468	9.37237	4.50649
ENSG00000151692	ENSG00000151692	ring finger protein 144A [Source:HGNC Symbol;Acc:HGNC:20457]	RNF144A	653.639	2.70418	50.1051	1.44943e-49	405.938	2.70418	31.5093	2.71683e-41	Y	Y	439.123	386.69	392.003	701.605	676.446	582.865	3.3259	2.08275	2.70389
ENSG00000168765	ENSG00000168765	glutathione S-transferase mu 4 [Source:HGNC Symbol;Acc:HGNC:4636]	GSTM4	298	1032.73	-3.32681	1.45646e-49	322.218	1032.73	-3.08367	6.26402e-44	Y	Y	331.049	289.772	345.834	315.45	324.073	254.477	1056.53	1073.66	967.994
ENSG00000013725	ENSG00000013725	CD6 molecule [Source:HGNC Symbol;Acc:HGNC:1691]	CD6	294.824	27.882	8.2588	1.81288e-49	82.6664	27.882	2.52568	4.28852e-10	Y	Y	79.6337	81.2537	87.1117	313.275	281.168	290.029	29.9331	37.4895	16.2234
ENSG00000115009	ENSG00000115009	C-C motif chemokine ligand 20 [Source:HGNC Symbol;Acc:HGNC:10619]	CCL20	338.639	32.0118	8.14903	1.26943e-48	102.318	32.0118	2.69155	2.12841e-11	Y	Y	98.9733	100.833	107.147	379.628	372.456	263.833	41.0195	27.0757	27.9402
ENSG00000119125	ENSG00000119125	guanine deaminase [Source:HGNC Symbol;Acc:HGNC:4212]	GDA	681.4	2.70603	46.5975	1.2911e-48	575.557	2.70603	39.6764	1.13669e-45	Y	Y	640.482	497.312	588.875	765.783	735.783	542.635	1.10863	5.20687	1.8026
ENSG00000213190	ENSG00000213190	MLLT11, transcription factor 7 cofactor [Source:HGNC Symbol;Acc:HGNC:16997]	MLLT11	1398.94	498.021	2.74146	2.8984e-48	1156.64	498.021	2.27359	7.94256e-32	Y	Y	1254.8	1137.55	1077.57	1365.14	1480.69	1350.97	522.167	524.853	447.044
ENSG00000101210	ENSG00000101210	eukaryotic translation elongation factor 1 alpha 2 [Source:HGNC Symbol;Acc:HGNC:3192]	EEF1A2	7463.79	21682.9	-2.82463	6.47228e-48	8536.68	21682.9	-2.47873	1.01708e-36	Y	Y	8234.12	8498.36	8877.56	6340.55	7637.17	8413.65	20582.9	23669.4	20796.5
ENSG00000188818	ENSG00000188818	zinc finger DHHC-type containing 11 [Source:HGNC Symbol;Acc:HGNC:19158]	ZDHHC11	289.472	16.0193	11.2865	1.15584e-47	80.3621	16.0193	3.49512	4.90949e-14	Y	Y	68.2575	82.2327	90.5962	255.624	263.823	348.971	11.0863	13.5379	23.4337
ENSG00000175832	ENSG00000175832	ETS variant 4 [Source:HGNC Symbol;Acc:HGNC:3493]	ETV4	716.677	228.734	3.02034	1.22258e-47	495.229	228.734	2.10673	2.64258e-21	Y	Y	468.701	549.197	467.79	736.413	716.612	697.006	220.618	224.937	240.646
ENSG00000177283	ENSG00000177283	frizzled class receptor 8 [Source:HGNC Symbol;Acc:HGNC:4046]	FZD8	1664.9	388.823	3.9812	2.20196e-47	2028.16	388.823	4.80929	2.73437e-61	Y	Y	2148.97	2109.66	1825.86	1973.2	1709.83	1311.68	400.217	416.55	349.703
ENSG00000142327	ENSG00000142327	arginyl aminopeptidase like 1 [Source:HGNC Symbol;Acc:HGNC:10079]	RNPEPL1	5499.96	1755.13	3.02555	4.63676e-47	3645.37	1755.13	2.0303	1.75584e-19	Y	Y	3673.39	3576.14	3686.57	6481.96	5202.51	4815.42	1718.38	1932.79	1614.22
ENSG00000198865	ENSG00000198865	coiled-coil domain containing 152 [Source:HGNC Symbol;Acc:HGNC:34438]	CCDC152	83.9763	578.182	-6.11558	5.18864e-47	0.871117	578.182	-53.976	1.6011e-25	Y	Y	0	0	2.61335	89.1963	77.595	85.1376	624.161	448.832	661.552
ENSG00000132561	ENSG00000132561	matrilin 2 [Source:HGNC Symbol;Acc:HGNC:6908]	MATN2	8378.41	2270.9	3.49955	7.49988e-47	11360.1	2270.9	4.69013	3.00137e-71	Y	Y	11701.6	11281.5	11097.2	9787.66	8716.2	6631.38	2279.35	2518.04	2015.3
ENSG00000138696	ENSG00000138696	bone morphogenetic protein receptor type 1B [Source:HGNC Symbol;Acc:HGNC:1077]	BMPR1B	31.1751	276.23	-7.3842	1.66447e-46	17.6576	276.23	-11.3077	7.56793e-54	Y	Y	19.3396	12.7265	20.9068	31.545	28.2993	33.6808	284.919	263.468	280.304
ENSG00000130176	ENSG00000130176	calponin 1 [Source:HGNC Symbol;Acc:HGNC:2155]	CNN1	51.4059	649.817	-9.04737	9.78875e-46	82.831	649.817	-6.14349	8.86232e-33	Y	Y	65.9822	91.0434	91.4673	32.6328	39.2539	82.3309	541.013	754.996	653.441
ENSG00000124006	ENSG00000124006	obscurin like 1 [Source:HGNC Symbol;Acc:HGNC:29092]	OBSL1	1837.06	756.801	2.38545	2.80952e-45	1847.05	756.801	2.39883	7.81306e-46	Y	Y	1862.29	1812.06	1866.8	1927.51	1790.16	1793.5	720.612	847.679	702.111
ENSG00000225830	ENSG00000225830	ERCC excision repair 6, chromatin remodeling factor [Source:HGNC Symbol;Acc:HGNC:3438]	ERCC6	452.818	1304.21	-2.79436	4.76399e-45	464.219	1304.21	-2.73235	3.65836e-43	Y	Y	443.673	501.228	447.754	388.33	492.043	478.08	1334.8	1314.21	1263.62
ENSG00000123843	ENSG00000123843	complement component 4 binding protein beta [Source:HGNC Symbol;Acc:HGNC:1328]	C4BPB	20.9516	283.137	-9.66745	5.62102e-45	24.3507	283.137	-8.80081	6.67193e-43	Y	Y	30.7159	20.5582	21.7779	11.9654	22.822	28.0673	277.158	254.095	318.158
ENSG00000198088	ENSG00000198088	nucleoporin 62 C-terminal like [Source:HGNC Symbol;Acc:HGNC:25960]	NUP62CL	220.379	18.9106	8.34726	2.1954e-44	123.48	18.9106	4.82889	4.06485e-25	Y	Y	129.689	105.728	135.023	204.499	222.743	233.895	17.7381	21.8689	17.1247
ENSG00000170873	ENSG00000170873	MTSS1, I-BAR domain containing [Source:HGNC Symbol;Acc:HGNC:20443]	MTSS1	10771.1	2929.22	3.48045	3.00782e-44	9483.98	2929.22	3.08063	4.55094e-36	Y	Y	9999.72	8977.07	9475.14	13165.2	10511.8	8636.32	3241.65	2836.7	2709.3
ENSG00000115350	ENSG00000115350	DNA polymerase epsilon 4, accessory subunit [Source:HGNC Symbol;Acc:HGNC:18755]	POLE4	151.966	630.844	-3.91356	4.14307e-44	52.9868	630.844	-10.0264	5.27468e-94	Y	Y	48.9178	42.0953	67.9471	167.515	141.497	146.886	629.704	590.459	672.368
ENSG00000197943	ENSG00000197943	phospholipase C gamma 2 [Source:HGNC Symbol;Acc:HGNC:9066]	PLCG2	104.601	530.171	-4.58941	4.38081e-44	177.109	530.171	-2.82411	1.72906e-22	Y	Y	188.846	183.066	159.414	120.741	99.5041	93.5578	590.902	563.384	436.228
ENSG00000124212	ENSG00000124212	prostaglandin I2 synthase [Source:HGNC Symbol;Acc:HGNC:9603]	PTGIS	365.827	1542.33	-3.91757	6.95723e-44	674.111	1542.33	-2.20016	1.74726e-15	Y	Y	741.731	656.883	623.72	381.804	377.933	337.744	1754.97	1692.23	1179.8
ENSG00000178878	ENSG00000178878	apolipoprotein L domain containing 1 [Source:HGNC Symbol;Acc:HGNC:25268]	APOLD1	362.782	1205.48	-3.1855	7.73662e-44	444.56	1205.48	-2.62535	4.09128e-31	Y	Y	510.793	400.395	422.492	379.628	394.365	314.354	1168.5	1293.39	1154.56
ENSG00000073350	ENSG00000073350	LLGL2, scribble cell polarity complex component [Source:HGNC Symbol;Acc:HGNC:6629]	LLGL2	403.733	95.6363	3.89307	1.39913e-43	292.701	95.6363	2.8537	1.31797e-25	Y	Y	317.397	274.109	286.598	439.455	380.672	391.072	83.1475	101.013	102.748
ENSG00000177674	ENSG00000177674	angiotensin II receptor associated protein [Source:HGNC Symbol;Acc:HGNC:13539]	AGTRAP	214.697	1154.75	-4.79715	2.27498e-43	465.963	1154.75	-2.34305	8.74294e-14	Y	Y	541.509	443.469	412.91	273.028	202.66	168.404	1253.86	1255.9	954.474
ENSG00000177103	ENSG00000177103	DS cell adhesion molecule like 1 [Source:HGNC Symbol;Acc:HGNC:14656]	DSCAML1	307.852	38.1237	6.52823	3.50077e-43	129.273	38.1237	2.90684	2.76675e-14	Y	Y	136.515	114.538	136.765	360.048	289.384	274.124	36.5849	48.9446	28.8415
ENSG00000205336	ENSG00000205336	adhesion G protein-coupled receptor G1 [Source:HGNC Symbol;Acc:HGNC:4512]	ADGRG1	5437.27	19851.2	-3.45658	3.56342e-43	6735.74	19851.2	-2.81654	3.18282e-30	Y	Y	6107.9	7483.18	6616.13	4458.73	5522.02	6331.06	19057.4	22815.5	17680.8
ENSG00000197067	ENSG00000197067	olfactory receptor family 2 subfamily T member 32 pseudogene [Source:HGNC Symbol;Acc:HGNC:31254]	OR2T32P	7.67774	257.553	-16.097	9.61727e-43	29.1954	257.553	-6.89363	1.39642e-32	Y	Y	29.5782	28.3899	29.618	5.4388	7.30306	10.2914	218.401	328.033	226.226
ENSG00000138663	ENSG00000138663	COP9 signalosome subunit 4 [Source:HGNC Symbol;Acc:HGNC:16702]	COPS4	1203.8	2583.49	-2.12179	1.08584e-42	1264.76	2583.49	-2.0202	1.9605e-37	Y	Y	1254.8	1251.11	1288.38	1240.05	1180.36	1190.99	2773.8	2389.95	2586.72
ENSG00000126561	ENSG00000126561	signal transducer and activator of transcription 5A [Source:HGNC Symbol;Acc:HGNC:11366]	STAT5A	304.249	51.0207	5.10589	1.41953e-42	287.465	51.0207	4.83985	9.20864e-40	Y	Y	313.984	265.298	283.113	355.697	285.732	271.318	45.454	56.2342	51.374
ENSG00000065413	ENSG00000065413	ankyrin repeat domain 44 [Source:HGNC Symbol;Acc:HGNC:25259]	ANKRD44	381.905	87.8724	3.97166	1.64682e-42	335.221	87.8724	3.5027	6.76404e-35	Y	Y	329.911	322.078	353.674	363.312	403.494	378.909	67.6267	96.8478	99.1427
ENSG00000134851	ENSG00000134851	transmembrane protein 165 [Source:HGNC Symbol;Acc:HGNC:30760]	TMEM165	2989.9	6569.88	-2.16859	3.05502e-42	3104.06	6569.88	-2.09045	2.25768e-38	Y	Y	3026.08	3061.21	3224.88	2759.65	3286.38	2923.68	6816.99	6228.46	6664.19
ENSG00000106772	ENSG00000106772	prune homolog 2 [Source:HGNC Symbol;Acc:HGNC:25209]	PRUNE2	48.8353	1209.71	-11.8359	3.16233e-42	471.911	1209.71	-2.17939	8.83682e-05	Y	Y	402.719	497.312	515.701	26.1062	49.2956	71.1039	958.968	1243.4	1426.75
ENSG00000163362	ENSG00000163362	innate immunity activator [Source:HGNC Symbol;Acc:HGNC:25599]	INAVA	804.529	227.383	3.35498	3.87009e-42	509.322	227.383	2.15857	5.39995e-17	Y	Y	477.802	581.503	468.661	796.24	725.741	891.606	210.64	248.888	222.621
ENSG00000142661	ENSG00000142661	myomesin 3 [Source:HGNC Symbol;Acc:HGNC:26679]	MYOM3	548.799	147.301	3.50353	7.66487e-42	693.523	147.301	4.39706	9.46655e-59	Y	Y	609.767	786.106	684.698	561.284	533.123	551.991	155.209	161.413	125.28
ENSG00000107317	ENSG00000107317	prostaglandin D2 synthase [Source:HGNC Symbol;Acc:HGNC:9592]	PTGDS	644.551	81.9699	6.24774	7.9082e-42	870.265	81.9699	8.24049	4.09337e-55	Y	Y	829.328	988.75	792.717	865.857	552.294	515.504	98.6684	89.5582	57.683
ENSG00000065621	ENSG00000065621	glutathione S-transferase omega 2 [Source:HGNC Symbol;Acc:HGNC:23064]	GSTO2	278.65	47.9513	4.97492	2.97436e-41	418.946	47.9513	7.35379	6.61525e-64	Y	Y	408.407	442.49	405.941	301.309	283.906	250.735	43.2367	64.5652	36.0519
ENSG00000167080	ENSG00000167080	beta-1,4-N-acetyl-galactosaminyltransferase 2 [Source:HGNC Symbol;Acc:HGNC:24136]	B4GALNT2	414.662	6.49458	14.4774	1.29638e-40	1645.97	6.49458	47.1126	3.1879e-72	Y	Y	1894.14	1440.05	1603.73	577.6	366.066	300.321	8.86907	5.20687	5.40779
ENSG00000105426	ENSG00000105426	protein tyrosine phosphatase, receptor type S [Source:HGNC Symbol;Acc:HGNC:9681]	PTPRS	667.001	2075.45	-2.99414	1.85062e-40	651.768	2075.45	-3.05731	6.93241e-42	Y	Y	598.39	677.441	679.471	722.272	685.574	593.157	1841.44	2412.86	1972.04
ENSG00000145911	ENSG00000145911	NEDD4 binding protein 3 [Source:HGNC Symbol;Acc:HGNC:29852]	N4BP3	1520.92	324.527	4.25061	7.22222e-40	744.501	324.527	2.16906	8.74448e-12	Y	Y	865.732	704.852	662.92	1803.51	1457.87	1301.39	378.044	346.778	248.758
ENSG00000006468	ENSG00000006468	ETS variant 1 [Source:HGNC Symbol;Acc:HGNC:3490]	ETV1	424.805	105.265	3.74836	1.17295e-39	315.045	105.265	2.81398	4.1831e-24	Y	Y	277.58	350.468	317.087	390.506	460.093	423.817	118.624	98.9306	98.2414
ENSG00000077420	ENSG00000077420	amyloid beta precursor protein binding family B member 1 interacting protein [Source:HGNC Symbol;Acc:HGNC:17379]	APBB1IP	2830.09	1114.51	2.48156	1.8544e-39	2336.81	1114.51	2.0573	6.49099e-25	Y	Y	2665.45	2070.5	2274.49	2948.92	2900.23	2641.14	1141.89	1103.86	1097.78
ENSG00000185565	ENSG00000185565	limbic system associated membrane protein [Source:HGNC Symbol;Acc:HGNC:6705]	LSAMP	217.007	6.84541	12.9438	2.13612e-39	370.866	6.84541	21.3856	5.92151e-53	Y	Y	360.627	325.994	425.976	264.326	213.614	173.082	4.43454	12.4965	3.60519
ENSG00000169255	ENSG00000169255	beta-1,3-N-acetylgalactosaminyltransferase 1 (globoside blood group) [Source:HGNC Symbol;Acc:HGNC:918]	B3GALNT1	1539.99	692.705	2.18915	4.0921e-39	1876.49	692.705	2.65988	2.30493e-61	Y	Y	1864.57	1802.27	1962.63	1556.58	1493.47	1569.9	733.916	625.866	718.334
ENSG00000168621	ENSG00000168621	glial cell derived neurotrophic factor [Source:HGNC Symbol;Acc:HGNC:4232]	GDNF	284.473	4.46037	18.6237	8.21665e-39	217.6	4.46037	14.5802	6.9612e-34	Y	Y	234.351	216.35	202.099	372.014	280.255	201.149	6.6518	3.12412	3.60519
ENSG00000161642	ENSG00000161642	zinc finger protein 385A [Source:HGNC Symbol;Acc:HGNC:17521]	ZNF385A	65.0381	341.61	-4.69111	1.43502e-38	62.2976	341.61	-4.8753	7.60707e-40	Y	Y	65.9822	61.6745	59.236	68.5289	63.9017	62.6837	340.351	391.557	292.922
ENSG00000140600	ENSG00000140600	SH3 domain containing GRB2 like 3, endophilin A3 [Source:HGNC Symbol;Acc:HGNC:10832]	SH3GL3	59.513	311.333	-4.6203	3.10466e-38	109.365	311.333	-2.69293	1.23783e-18	Y	Y	129.689	93.0013	105.405	50.0369	62.076	66.426	298.222	317.619	318.158
ENSG00000256802	ENSG00000256802	uncharacterized LOC100130111 [Source:NCBI gene;Acc:100130111]		229.528	34.63	5.53039	9.49467e-38	110.374	34.63	2.76462	1.52118e-13	Y	Y	119.451	110.623	101.05	218.64	251.955	217.99	35.4763	39.5722	28.8415
ENSG00000137642	ENSG00000137642	sortilin related receptor 1 [Source:HGNC Symbol;Acc:HGNC:11185]	SORL1	226.802	18.4479	8.21096	1.07444e-37	118.07	18.4479	4.51275	3.59795e-20	Y	Y	127.414	121.391	105.405	281.73	220.917	177.76	19.9554	21.8689	13.5195
ENSG00000180287	ENSG00000180287	phospholipase D family member 5 [Source:HGNC Symbol;Acc:HGNC:26879]	PLD5	456.554	120.45	3.50086	1.29194e-37	879.645	120.45	6.58416	2.44009e-86	Y	Y	1001.11	799.811	838.015	479.702	480.176	409.783	123.058	103.096	135.195
ENSG00000186469	ENSG00000186469	G protein subunit gamma 2 [Source:HGNC Symbol;Acc:HGNC:4404]	GNG2	235.661	55.7124	3.78508	2.22304e-37	643.225	55.7124	10.0629	9.88149e-116	Y	Y	597.253	668.63	663.791	240.395	236.436	230.152	50.9972	59.3583	56.7818
ENSG00000065989	ENSG00000065989	phosphodiesterase 4A [Source:HGNC Symbol;Acc:HGNC:8780]	PDE4A	294.503	825.535	-2.71225	3.20838e-37	385.329	825.535	-2.09771	1.69062e-21	Y	Y	397.031	413.121	345.834	284.993	311.293	287.222	813.737	897.665	765.202
ENSG00000115425	ENSG00000115425	peroxisomal trans-2-enoyl-CoA reductase [Source:HGNC Symbol;Acc:HGNC:18281]	PECR	683.752	230.693	2.85456	3.46438e-37	513.087	230.693	2.1583	7.21156e-20	Y	Y	556.298	493.396	489.568	725.536	714.787	610.933	250.551	227.02	214.509
ENSG00000110328	ENSG00000110328	polypeptide N-acetylgalactosaminyltransferase 18 [Source:HGNC Symbol;Acc:HGNC:30488]	GALNT18	2595.26	1087.12	2.33912	1.68437e-36	2400.43	1087.12	2.16632	3.52112e-30	Y	Y	2691.62	2236.93	2272.74	2715.05	2675.66	2395.08	1060.96	1154.88	1045.51
ENSG00000242265	ENSG00000242265	paternally expressed 10 [Source:HGNC Symbol;Acc:HGNC:14005]	PEG10	27924.2	11013.5	2.47323	1.90869e-36	42199.7	11013.5	3.69766	1.06085e-75	Y	Y	36101.4	47691.1	42806.7	25588.5	29480.6	28703.5	10365.7	11129.2	11545.6
ENSG00000086619	ENSG00000086619	endoplasmic reticulum oxidoreductase 1 beta [Source:HGNC Symbol;Acc:HGNC:14355]	ERO1B	359.45	57.9671	5.2245	3.00984e-36	136.01	57.9671	2.11954	6.78241e-08	Y	Y	155.855	114.538	137.637	422.051	357.85	298.449	68.7353	44.7791	60.3869
ENSG00000213694	ENSG00000213694	sphingosine-1-phosphate receptor 3 [Source:HGNC Symbol;Acc:HGNC:3167]	S1PR3	2803.62	913.783	2.93664	1.71631e-35	2383.58	913.783	2.51155	5.35753e-26	Y	Y	2616.54	2404.33	2129.88	3281.77	2699.39	2429.7	1013.29	913.285	814.773
ENSG00000120162	ENSG00000120162	MOB kinase activator 3B [Source:HGNC Symbol;Acc:HGNC:23825]	MOB3B	155.625	7.95219	10.0493	2.22772e-35	201.368	7.95219	12.8001	6.89591e-42	Y	Y	220.699	198.729	184.677	147.935	154.277	164.662	9.9777	9.37237	4.50649
ENSG00000165949	ENSG00000165949	interferon alpha inducible protein 27 [Source:HGNC Symbol;Acc:HGNC:5397]	IFI27	54.9033	285.636	-4.57461	2.42546e-35	112.253	285.636	-2.40987	3.55436e-14	Y	Y	124.001	112.58	100.178	63.0901	52.0343	49.5856	322.612	280.13	254.166
ENSG00000173890	ENSG00000173890	G protein-coupled receptor 160 [Source:HGNC Symbol;Acc:HGNC:23693]	GPR160	1034.51	371.549	2.68843	2.42546e-35	875.824	371.549	2.28857	1.02931e-24	Y	Y	865.732	801.769	959.971	1080.15	1101.85	921.544	384.696	334.281	395.67
ENSG00000169432	ENSG00000169432	sodium voltage-gated channel alpha subunit 9 [Source:HGNC Symbol;Acc:HGNC:10597]	SCN9A	616.581	178.948	3.23839	2.77548e-35	600.368	178.948	3.15638	1.13489e-33	Y	Y	557.436	574.65	669.018	523.212	644.495	682.036	159.643	184.323	192.878
ENSG00000111110	ENSG00000111110	protein phosphatase, Mg2+/Mn2+ dependent 1H [Source:HGNC Symbol;Acc:HGNC:18583]	PPM1H	882.563	158.66	4.735	3.98518e-35	1408.12	158.66	7.2998	4.75448e-57	Y	Y	1605.19	1373.48	1245.7	1147.59	888.234	611.868	147.448	184.323	144.208
ENSG00000154080	ENSG00000154080	carbohydrate sulfotransferase 9 [Source:HGNC Symbol;Acc:HGNC:19898]	CHST9	9.69121	209.589	-11.6281	7.31657e-35	15.8286	209.589	-8.77776	1.5638e-31	Y	Y	15.9267	17.6213	13.9379	3.26328	15.519	10.2914	209.532	248.888	170.345
ENSG00000138642	ENSG00000138642	HECT and RLD domain containing E3 ubiquitin protein ligase family member 6 [Source:HGNC Symbol;Acc:HGNC:26072]	HERC6	284.031	783.007	-2.6668	1.03366e-34	292.749	783.007	-2.59552	7.46627e-33	Y	Y	293.507	302.499	282.242	253.448	268.387	330.259	770.5	766.451	812.069
ENSG00000169594	ENSG00000169594	basonuclin 1 [Source:HGNC Symbol;Acc:HGNC:1081]	BNC1	3.66896	234.796	-24.3658	1.32517e-34	1.61259	234.796	-29.2218	1.59758e-24	Y	Y	1.13762	1.95792	1.74223	5.4388	1.82576	3.74231	205.097	234.309	264.982
ENSG00000214402	ENSG00000214402	lipocalin like 1 [Source:HGNC Symbol;Acc:HGNC:34436]	LCNL1	174.788	12.8061	8.0802	2.29101e-34	218.528	12.8061	9.97242	8.09664e-41	Y	Y	194.534	191.876	269.175	189.27	144.235	190.858	13.3036	12.4965	12.6182
ENSG00000019505	ENSG00000019505	synaptotagmin 13 [Source:HGNC Symbol;Acc:HGNC:14962]	SYT13	1471	43.4374	9.91065	3.07513e-34	1591.62	43.4374	10.5361	9.98706e-36	Y	Y	1767.87	1517.39	1489.61	2158.12	1386.67	868.217	52.1058	52.0687	26.1376
ENSG00000124496	ENSG00000124496	transcriptional regulating factor 1 [Source:HGNC Symbol;Acc:HGNC:18273]	TRERF1	332.311	96.6508	3.21929	3.76615e-34	511.508	96.6508	4.89864	4.22658e-64	Y	Y	482.353	536.471	515.701	362.224	323.16	311.548	101.994	104.137	83.8207
ENSG00000103489	ENSG00000103489	xylosyltransferase 1 [Source:HGNC Symbol;Acc:HGNC:15516]	XYLT1	508.449	1.68708	41.0171	5.63461e-34	529.844	1.68708	42.6796	2.0718e-34	Y	Y	585.877	491.438	512.217	579.776	501.172	444.4	2.21727	1.04137	1.8026
ENSG00000172164	ENSG00000172164	syntrophin beta 1 [Source:HGNC Symbol;Acc:HGNC:11168]	SNTB1	3983.49	1645.45	2.36669	7.43765e-34	3545.65	1645.45	2.11291	1.42667e-25	Y	Y	3549.39	3425.38	3662.18	4229.21	4292.37	3428.89	1695.1	1756.8	1484.44
ENSG00000172137	ENSG00000172137	calbindin 2 [Source:HGNC Symbol;Acc:HGNC:1435]	CALB2	327.59	41.3559	6.00073	8.86207e-34	270.745	41.3559	5.04595	1.10089e-27	Y	Y	313.984	229.077	269.175	432.928	312.206	237.637	43.2367	44.7791	36.0519
ENSG00000169439	ENSG00000169439	syndecan 2 [Source:HGNC Symbol;Acc:HGNC:10659]	SDC2	7526.69	3495.01	2.1207	9.13268e-34	8526.17	3495.01	2.39707	1.59522e-45	Y	Y	8205.68	8430.81	8942.02	8270.24	7670.03	6639.8	3345.86	3517.76	3621.41
ENSG00000227706	ENSG00000227706	novel transcript		301.773	50.0525	4.99955	1.12407e-33	248.42	50.0525	4.16147	1.83757e-26	Y	Y	306.021	223.203	216.037	330.679	255.607	319.032	45.454	61.4411	43.2623
ENSG00000143473	ENSG00000143473	potassium voltage-gated channel subfamily H member 1 [Source:HGNC Symbol;Acc:HGNC:6250]	KCNH1	437.584	110.581	3.65224	1.26041e-33	301.1	110.581	2.55994	1.12272e-17	Y	Y	288.957	318.162	296.18	462.298	450.964	399.492	138.579	109.344	83.8207
ENSG00000152056	ENSG00000152056	adaptor related protein complex 1 subunit sigma 3 [Source:HGNC Symbol;Acc:HGNC:18971]	AP1S3	720.272	249.03	2.77638	2.28302e-33	571.79	249.03	2.21785	3.14441e-20	Y	Y	632.519	561.924	520.928	774.485	760.431	625.902	249.443	248.888	248.758
ENSG00000198189	ENSG00000198189	hydroxysteroid 17-beta dehydrogenase 11 [Source:HGNC Symbol;Acc:HGNC:22960]	HSD17B11	631.837	1614.57	-2.48844	2.95864e-33	426.621	1614.57	-3.63767	9.94618e-64	Y	Y	447.086	418.995	413.781	653.744	704.745	537.022	1722.82	1512.08	1608.82
ENSG00000109794	ENSG00000109794	family with sequence similarity 149 member A [Source:HGNC Symbol;Acc:HGNC:24527]	FAM149A	192.691	18.4476	7.08541	2.99268e-33	121.927	18.4476	4.66383	3.69177e-21	Y	Y	122.863	117.475	125.441	240.395	190.792	146.886	16.6295	19.7861	18.9273
ENSG00000138646	ENSG00000138646	HECT and RLD domain containing E3 ubiquitin protein ligase 5 [Source:HGNC Symbol;Acc:HGNC:24368]	HERC5	542.122	1231.22	-2.23533	3.31778e-33	87.7475	1231.22	-12.6174	2.88483e-199	Y	Y	92.1476	74.401	96.694	551.494	568.725	506.148	1242.78	1207.99	1242.89
ENSG00000169047	ENSG00000169047	insulin receptor substrate 1 [Source:HGNC Symbol;Acc:HGNC:6125]	IRS1	5333.75	2481.54	2.11661	6.6977e-33	5052.52	2481.54	2.00713	2.14735e-28	Y	Y	4674.5	5765.1	4717.97	5209.28	5416.13	5375.83	2420.15	2571.15	2453.33
ENSG00000073464	ENSG00000073464	chloride voltage-gated channel 4 [Source:HGNC Symbol;Acc:HGNC:2022]	CLCN4	254.039	627.374	-2.40829	7.10752e-33	304.028	627.374	-2.02719	4.03304e-22	Y	Y	306.021	322.078	283.984	250.185	256.52	255.413	640.79	638.362	602.968
ENSG00000114374	ENSG00000114374	ubiquitin specific peptidase 9 Y-linked [Source:HGNC Symbol;Acc:HGNC:12633]	USP9Y	746.497	1907.37	-2.49618	7.59032e-33	7.63366	1907.37	-95.2339	6.97566e-141	Y	Y	3.41287	2.93688	16.5512	712.483	746.737	780.272	1717.27	1905.72	2099.12
ENSG00000099256	ENSG00000099256	phosphoribosyl transferase domain containing 1 [Source:HGNC Symbol;Acc:HGNC:23333]	PRTFDC1	186.846	3.37416	15.7238	1.61962e-32	386.435	3.37416	31.8292	1.66377e-45	Y	Y	379.967	392.563	386.776	189.27	194.444	176.824	4.43454	2.08275	3.60519
ENSG00000125746	ENSG00000125746	echinoderm microtubule associated protein like 2 [Source:HGNC Symbol;Acc:HGNC:18035]	EML2	2318.71	790.302	2.81129	1.67624e-32	1764.77	790.302	2.16185	3.14073e-18	Y	Y	1916.9	1645.63	1731.78	2816.21	2182.7	1957.23	808.194	816.437	746.274
ENSG00000107518	ENSG00000107518	attractin like 1 [Source:HGNC Symbol;Acc:HGNC:29063]	ATRNL1	197.417	36.1285	4.53581	2.88362e-32	365.645	36.1285	8.1774	4.77907e-62	Y	Y	382.242	359.279	355.416	229.517	199.008	163.726	39.9108	33.324	35.1506
ENSG00000174792	ENSG00000174792	odontogenesis associated phosphoprotein [Source:HGNC Symbol;Acc:HGNC:26300]	ODAPH	26.2003	198.817	-5.95007	2.88849e-32	42.7557	198.817	-4.00958	1.79633e-22	Y	Y	34.1287	47.9691	46.1692	18.4919	28.2993	31.8097	203.989	190.572	201.891
ENSG00000120318	ENSG00000120318	ArfGAP with RhoGAP domain, ankyrin repeat and PH domain 3 [Source:HGNC Symbol;Acc:HGNC:24097]	ARAP3	291.233	862.286	-2.83712	3.24064e-32	177.04	862.286	-4.54939	2.093e-62	Y	Y	180.882	158.592	191.646	244.746	291.209	337.744	822.606	914.327	849.924
ENSG00000149380	ENSG00000149380	prolyl 4-hydroxylase subunit alpha 3 [Source:HGNC Symbol;Acc:HGNC:30135]	P4HA3	177.759	29.3562	4.87025	3.36397e-32	370.411	29.3562	9.81288	4.53787e-66	Y	Y	375.416	361.237	374.58	194.709	192.618	145.95	35.4763	29.1585	23.4337
ENSG00000172927	ENSG00000172927	myeloma overexpressed [Source:HGNC Symbol;Acc:HGNC:7563]	MYEOV	852.57	286.015	2.84844	7.44686e-32	609.597	286.015	2.06374	2.49788e-15	Y	Y	524.445	651.009	653.338	795.152	830.723	931.836	311.526	243.682	302.836
ENSG00000214049	ENSG00000214049	urothelial cancer associated 1 [Source:HGNC Symbol;Acc:HGNC:37126]	UCA1	290.144	37.5182	5.85419	1.53508e-31	145.479	37.5182	3.11562	1.61489e-13	Y	Y	201.36	117.475	117.601	320.889	286.645	262.897	31.0417	36.4481	45.0649
ENSG00000115318	ENSG00000115318	lysyl oxidase like 3 [Source:HGNC Symbol;Acc:HGNC:13869]	LOXL3	93.0567	327.603	-3.29949	2.64322e-31	93.0426	327.603	-3.29733	4.37196e-31	Y	Y	89.8723	96.9171	92.3384	93.5473	97.6784	87.9443	342.568	337.405	302.836
ENSG00000106991	ENSG00000106991	endoglin [Source:HGNC Symbol;Acc:HGNC:3349]	ENG	31.1372	207.405	-5.46598	3.24807e-31	34.3505	207.405	-5.063	4.13174e-29	Y	Y	39.8169	28.3899	34.8447	31.545	32.8638	29.0029	215.075	225.978	181.161
ENSG00000117228	ENSG00000117228	guanylate binding protein 1 [Source:HGNC Symbol;Acc:HGNC:4182]	GBP1	1119.41	3158.9	-2.71213	3.76991e-31	1471.78	3158.9	-2.08553	2.84882e-17	Y	Y	1329.88	1470.4	1615.05	938.737	1088.16	1331.33	3085.33	2950.21	3441.15
ENSG00000166689	ENSG00000166689	pleckstrin homology domain containing A7 [Source:HGNC Symbol;Acc:HGNC:27049]	PLEKHA7	349.253	105.978	3.07275	7.09347e-31	642.228	105.978	5.54352	3.25262e-73	Y	Y	666.648	644.156	615.88	397.032	318.596	332.13	117.515	89.5582	110.86
ENSG00000133985	ENSG00000133985	tetratricopeptide repeat domain 9 [Source:HGNC Symbol;Acc:HGNC:20267]	TTC9	873.699	340.115	2.49166	9.84035e-31	1087.82	340.115	3.08526	6.54057e-47	Y	Y	1098.95	1018.12	1146.39	928.947	915.621	776.53	383.587	324.909	311.849
ENSG00000110090	ENSG00000110090	carnitine palmitoyltransferase 1A [Source:HGNC Symbol;Acc:HGNC:2328]	CPT1A	1563.51	392.64	3.62624	1.00009e-30	1718.68	392.64	3.96168	5.84166e-35	Y	Y	2081.85	1723.95	1350.23	1736.06	1471.57	1482.89	471.169	403.012	303.737
ENSG00000130508	ENSG00000130508	peroxidasin [Source:HGNC Symbol;Acc:HGNC:14966]	PXDN	429.713	72.5228	4.88089	1.42146e-30	204.543	72.5228	2.47614	2.08386e-10	Y	Y	219.561	208.519	185.548	568.898	382.498	337.744	54.3231	81.2272	82.0181
ENSG00000154065	ENSG00000154065	ankyrin repeat domain 29 [Source:HGNC Symbol;Acc:HGNC:27110]	ANKRD29	464.834	135.751	3.19301	1.43238e-30	603.358	135.751	4.10665	2.34735e-45	Y	Y	606.354	559.966	643.756	542.792	438.183	413.526	160.752	123.924	122.576
ENSG00000115468	ENSG00000115468	EF-hand domain family member D1 [Source:HGNC Symbol;Acc:HGNC:29556]	EFHD1	264.786	66.5326	3.58391	2.31047e-30	339.955	66.5326	4.54827	6.96759e-43	Y	Y	328.773	334.805	356.287	234.956	303.99	255.413	56.5403	71.8548	71.2025
ENSG00000105173	ENSG00000105173	cyclin E1 [Source:HGNC Symbol;Acc:HGNC:1589]	CCNE1	195.846	569.062	-2.793	2.65038e-30	267.369	569.062	-2.07008	3.41359e-16	Y	Y	259.378	284.878	257.851	230.605	168.883	188.051	559.86	542.556	604.771
ENSG00000180914	ENSG00000180914	oxytocin receptor [Source:HGNC Symbol;Acc:HGNC:8529]	OXTR	908.449	355.845	2.47083	4.08776e-30	1282.72	355.845	3.45908	5.48185e-57	Y	Y	1221.81	1296.14	1330.2	999.651	921.098	804.597	386.913	309.288	371.335
ENSG00000100031	ENSG00000100031	gamma-glutamyltransferase 1 [Source:HGNC Symbol;Acc:HGNC:4250]	GGT1	1879.31	740.406	2.46361	4.10315e-30	1673.53	740.406	2.20218	4.13625e-23	Y	Y	1655.24	1741.57	1623.76	2115.69	1928.01	1594.23	764.957	795.61	660.651
ENSG00000101187	ENSG00000101187	solute carrier organic anion transporter family member 4A1 [Source:HGNC Symbol;Acc:HGNC:10953]	SLCO4A1	10284.2	3830.42	2.59092	4.55391e-30	10257.7	3830.42	2.58466	7.36099e-30	Y	Y	10066.8	11020.2	9685.95	12091.5	9902.94	8858.05	4231.66	3937.44	3322.18
ENSG00000182492	ENSG00000182492	biglycan [Source:HGNC Symbol;Acc:HGNC:1044]	BGN	14.2527	213.683	-8.89902	7.15926e-30	18.993	213.683	-7.33895	1.83757e-26	Y	Y	9.10099	31.3267	16.5512	14.1409	15.519	13.0981	210.64	258.261	172.148
ENSG00000178718	ENSG00000178718	ribonuclease P and MRP subunit p25 [Source:HGNC Symbol;Acc:HGNC:30361]	RPP25	46.716	218.799	-4.11218	2.00321e-29	83.4061	218.799	-2.4775	2.63728e-14	Y	Y	93.2852	80.2748	76.6583	41.3349	52.0343	46.7789	217.292	229.102	210.002
ENSG00000184860	ENSG00000184860	short chain dehydrogenase/reductase family 42E, member 1 [Source:HGNC Symbol;Acc:HGNC:29834]	SDR42E1	182.423	25.9811	5.36928	2.05689e-29	116.779	25.9811	3.5442	5.65443e-17	Y	Y	118.313	121.391	110.632	164.252	173.448	209.57	21.064	20.8275	36.0519
ENSG00000177462	ENSG00000177462	olfactory receptor family 2 subfamily T member 8 [Source:HGNC Symbol;Acc:HGNC:15020]	OR2T8	2.51534	257.146	-20.9404	3.46232e-29	26.1067	257.146	-6.92842	3.23192e-25	Y	Y	21.6149	24.474	32.2313	1.08776	3.65153	2.80673	164.078	273.881	333.48
ENSG00000182752	ENSG00000182752	pappalysin 1 [Source:HGNC Symbol;Acc:HGNC:8602]	PAPPA	1255.64	475.476	2.54343	6.57127e-29	1142.31	475.476	2.3199	1.74709e-23	Y	Y	1176.3	1143.43	1107.19	1184.57	1310.9	1271.45	380.261	487.363	558.805
ENSG00000115935	ENSG00000115935	WAS/WASL interacting protein family member 1 [Source:HGNC Symbol;Acc:HGNC:12736]	WIPF1	1795.89	786.725	2.23289	7.92828e-29	1794.49	786.725	2.23113	1.06571e-28	Y	Y	1953.3	1705.35	1724.81	1999.3	1781.03	1607.32	802.651	824.768	732.755
ENSG00000110675	ENSG00000110675	ELMO domain containing 1 [Source:HGNC Symbol;Acc:HGNC:25334]	ELMOD1	246.788	56.1281	3.84672	8.39289e-29	246.667	56.1281	3.85143	9.1867e-29	Y	Y	221.837	243.761	274.402	244.746	272.952	222.668	45.454	56.2342	66.696
ENSG00000163694	ENSG00000163694	RNA binding motif protein 47 [Source:HGNC Symbol;Acc:HGNC:30358]	RBM47	920.479	351.767	2.52604	8.60342e-29	1156.93	351.767	3.15361	3.02694e-44	Y	Y	1205.88	1122.87	1142.03	1024.67	964.916	771.852	360.306	375.936	319.059
ENSG00000178814	ENSG00000178814	5-oxoprolinase, ATP-hydrolysing [Source:HGNC Symbol;Acc:HGNC:8149]	OPLAH	87.039	457.643	-4.54505	1.41955e-28	41.4804	457.643	-8.46779	2.19737e-49	Y	Y	51.1931	32.3057	40.9425	106.6	69.379	85.1376	472.278	544.639	356.013
ENSG00000180346	ENSG00000180346	tigger transposable element derived 2 [Source:HGNC Symbol;Acc:HGNC:18333]	TIGD2	249.256	695.941	-2.67607	2.03562e-28	242.214	695.941	-2.74905	1.0351e-29	Y	Y	210.46	265.298	250.882	213.201	249.217	285.351	727.264	673.769	686.789
ENSG00000150627	ENSG00000150627	WD repeat domain 17 [Source:HGNC Symbol;Acc:HGNC:16661]	WDR17	258.259	73.1113	3.25059	2.80198e-28	250.517	73.1113	3.15052	1.10117e-26	Y	Y	262.791	245.719	243.042	244.746	281.168	248.864	76.4957	63.5238	79.3142
ENSG00000082512	ENSG00000082512	TNF receptor associated factor 5 [Source:HGNC Symbol;Acc:HGNC:12035]	TRAF5	154.225	28.3855	4.42433	2.98177e-28	253.809	28.3855	7.10675	1.16278e-48	Y	Y	282.131	238.866	240.428	164.252	151.538	146.886	31.0417	27.0757	27.0389
ENSG00000073756	ENSG00000073756	prostaglandin-endoperoxide synthase 2 [Source:HGNC Symbol;Acc:HGNC:9605]	PTGS2	141.74	11.6007	7.1711	3.03027e-28	143.556	11.6007	7.25184	1.86889e-28	Y	Y	163.818	137.055	129.796	168.603	139.671	116.947	17.7381	6.24825	10.8156
ENSG00000101298	ENSG00000101298	syntaphilin [Source:HGNC Symbol;Acc:HGNC:15931]	SNPH	1063.97	381.393	2.67402	3.59787e-28	954.651	381.393	2.41007	1.59133e-22	Y	Y	941.953	1030.85	891.153	1218.29	995.954	977.679	388.022	435.294	320.862
ENSG00000272620	ENSG00000272620	AFAP1 antisense RNA 1 [Source:HGNC Symbol;Acc:HGNC:28141]	AFAP1-AS1	214.634	19.9535	6.94825	4.33583e-28	65.2632	19.9535	2.45963	5.20024e-07	Y	Y	60.2941	67.5483	67.9471	290.432	195.357	158.113	12.195	26.0344	21.6311
ENSG00000065320	ENSG00000065320	netrin 1 [Source:HGNC Symbol;Acc:HGNC:8029]	NTN1	1860.76	631.093	2.80405	4.33583e-28	1464.01	631.093	2.22952	3.92909e-17	Y	Y	1510.77	1396	1485.25	2138.54	1924.36	1519.38	545.448	746.665	601.166
ENSG00000198185	ENSG00000198185	zinc finger protein 334 [Source:HGNC Symbol;Acc:HGNC:15806]	ZNF334	30.2524	216.745	-5.88248	6.37708e-28	1.45186	216.745	-23.0237	1.16118e-23	Y	Y	0	0	4.35559	32.6328	32.8638	25.2606	217.292	183.282	249.659
ENSG00000144369	ENSG00000144369	family with sequence similarity 171 member B [Source:HGNC Symbol;Acc:HGNC:29412]	FAM171B	455.06	150.688	2.85352	1.12697e-27	341.835	150.688	2.16371	5.61022e-15	Y	Y	353.801	340.678	331.025	405.734	507.562	451.884	143.014	133.296	175.753
ENSG00000175874	ENSG00000175874	cellular repressor of E1A stimulated genes 2 [Source:HGNC Symbol;Acc:HGNC:14272]	CREG2	168.465	23.2121	5.28795	1.31505e-27	249.931	23.2121	7.64322	2.46746e-40	Y	Y	254.828	246.698	248.268	216.464	157.016	131.917	18.8468	29.1585	21.6311
ENSG00000142910	ENSG00000142910	tubulointerstitial nephritis antigen like 1 [Source:HGNC Symbol;Acc:HGNC:19168]	TINAGL1	7107.42	20504.7	-2.75248	1.36707e-27	8107.79	20504.7	-2.42744	2.87088e-21	Y	Y	9310.32	7427.38	7585.69	8077.7	7392.52	5852.04	21476.5	22756.1	17281.5
ENSG00000121753	ENSG00000121753	adhesion G protein-coupled receptor B2 [Source:HGNC Symbol;Acc:HGNC:944]	ADGRB2	369.483	1449.09	-3.55242	4.41252e-27	607.532	1449.09	-2.24727	1.3198e-11	Y	Y	756.52	567.797	498.279	448.157	347.808	312.483	1441.22	1717.23	1188.81
ENSG00000231574	ENSG00000231574	long intergenic non-protein coding RNA 2015 [Source:HGNC Symbol;Acc:HGNC:52850]	LINC02015	71.5318	363.393	-4.28926	1.08609e-26	158.492	363.393	-2.13627	2.20322e-08	Y	Y	153.579	186.003	135.894	56.5635	78.5078	79.5241	415.738	404.053	270.389
ENSG00000118242	ENSG00000118242	melanoregulin [Source:HGNC Symbol;Acc:HGNC:25478]	MREG	266.879	75.0785	3.27349	1.59938e-26	163.581	75.0785	2.04692	8.69454e-10	Y	Y	174.057	170.339	146.348	240.395	270.213	290.029	78.713	70.8135	75.709
ENSG00000157570	ENSG00000157570	tetraspanin 18 [Source:HGNC Symbol;Acc:HGNC:20660]	TSPAN18	749.259	1613.49	-2.11614	2.05232e-26	515.914	1613.49	-3.04437	1.59177e-55	Y	Y	576.776	511.018	459.95	820.171	718.438	709.168	1554.3	1615.17	1671.01
ENSG00000198910	ENSG00000198910	L1 cell adhesion molecule [Source:HGNC Symbol;Acc:HGNC:6470]	L1CAM	1489.36	448.906	3.06098	5.70171e-26	20157.8	448.906	36.0304	2.26668e-262	Y	Y	22579.6	18878.3	19015.6	1691.47	1587.5	1189.12	416.846	567.549	362.322
ENSG00000132467	ENSG00000132467	UTP3, small subunit processome component [Source:HGNC Symbol;Acc:HGNC:24477]	UTP3	1074.25	2307.25	-2.10609	6.52107e-26	1015.29	2307.25	-2.2246	1.33356e-29	Y	Y	932.852	1017.14	1095.87	945.263	1079.94	1197.54	2297.09	2211.88	2412.77
ENSG00000137343	ENSG00000137343	alpha tubulin acetyltransferase 1 [Source:HGNC Symbol;Acc:HGNC:21186]	ATAT1	114.806	11.6505	5.90708	6.961e-26	254.579	11.6505	12.4953	8.68313e-49	Y	Y	242.314	249.635	271.789	125.092	96.7655	122.561	6.6518	9.37237	18.9273
ENSG00000104998	ENSG00000104998	interleukin 27 receptor subunit alpha [Source:HGNC Symbol;Acc:HGNC:17290]	IL27RA	129.666	376.943	-2.75893	8.40982e-26	172.167	376.943	-2.11666	4.22688e-15	Y	Y	170.644	182.087	163.77	124.005	141.497	123.496	385.805	406.136	338.888
ENSG00000116711	ENSG00000116711	phospholipase A2 group IVA [Source:HGNC Symbol;Acc:HGNC:9035]	PLA2G4A	166.112	2.42802	15.8776	1.58331e-25	152.946	2.42802	14.6812	1.65514e-24	Y	Y	158.13	143.907	156.801	175.129	170.709	152.499	2.21727	4.1655	0.901298
ENSG00000184307	ENSG00000184307	zinc finger DHHC-type containing 23 [Source:HGNC Symbol;Acc:HGNC:28654]	ZDHHC23	461.056	165.642	2.64581	1.60392e-25	460.648	165.642	2.64573	1.9094e-25	Y	Y	424.334	476.754	480.857	445.981	424.49	512.697	161.861	145.792	189.273
ENSG00000235109	ENSG00000235109	zinc finger and SCAN domain containing 31 [Source:HGNC Symbol;Acc:HGNC:14097]	ZSCAN31	57.6439	341.173	-4.73719	2.79826e-25	107.557	341.173	-2.79591	4.18413e-12	Y	Y	75.0832	128.244	119.343	35.8961	57.5116	79.5241	344.785	348.86	329.875
ENSG00000170290	ENSG00000170290	sarcolipin [Source:HGNC Symbol;Acc:HGNC:11089]	SLN	137.853	4.76266	11.3249	2.92076e-25	21.795	4.76266	2.31331	3.83124e-05	Y	Y	29.5782	16.6423	19.1646	162.076	120.5	130.981	4.43454	6.24825	3.60519
ENSG00000111348	ENSG00000111348	Rho GDP dissociation inhibitor beta [Source:HGNC Symbol;Acc:HGNC:679]	ARHGDIB	228.159	695.431	-2.87913	5.21916e-25	253.991	695.431	-2.6011	1.05835e-20	Y	Y	282.131	235.93	243.913	277.379	220.917	186.18	773.826	691.473	620.994
ENSG00000204161	ENSG00000204161	transmembrane protein 273 [Source:HGNC Symbol;Acc:HGNC:27274]	TMEM273	182.707	39.1085	3.93772	5.57382e-25	235.431	39.1085	4.98722	3.89571e-34	Y	Y	230.938	258.446	216.908	153.374	190.792	203.956	41.0195	31.2412	45.0649
ENSG00000135549	ENSG00000135549	cAMP-dependent protein kinase inhibitor beta [Source:HGNC Symbol;Acc:HGNC:9018]	PKIB	118.859	5.52602	8.4624	5.57382e-25	206.772	5.52602	14.0741	5.43845e-35	Y	Y	219.561	166.423	234.331	142.497	119.588	94.4934	5.54317	8.33099	2.70389
ENSG00000146678	ENSG00000146678	insulin like growth factor binding protein 1 [Source:HGNC Symbol;Acc:HGNC:5469]	IGFBP1	217.168	16.5258	6.86627	1.42062e-24	186.77	16.5258	6.04305	9.79236e-22	Y	Y	229.8	177.192	153.317	319.801	205.398	126.303	23.2813	14.5792	11.7169
ENSG00000021645	ENSG00000021645	neurexin 3 [Source:HGNC Symbol;Acc:HGNC:8010]	NRXN3	154.284	2.40375	14.9585	3.56318e-24	102.044	2.40375	10.1574	1.406e-19	Y	Y	97.8357	111.602	96.694	155.55	170.709	136.594	3.3259	2.08275	1.8026
ENSG00000101670	ENSG00000101670	lipase G, endothelial type [Source:HGNC Symbol;Acc:HGNC:6623]	LIPG	9172.59	2963.85	2.89653	3.78886e-24	12079	2963.85	3.75654	4.90301e-37	Y	Y	9636.82	12239.9	14360.4	7955.87	9261.19	10300.7	2526.58	2760.68	3604.29
ENSG00000153933	ENSG00000153933	diacylglycerol kinase epsilon [Source:HGNC Symbol;Acc:HGNC:2852]	DGKE	483.514	191.076	2.42799	1.24773e-23	446.058	191.076	2.24143	1.64339e-19	Y	Y	489.178	423.89	425.105	462.298	515.778	472.467	174.056	180.158	219.015
ENSG00000123342	ENSG00000123342	matrix metallopeptidase 19 [Source:HGNC Symbol;Acc:HGNC:7165]	MMP19	93.4519	314.524	-3.12076	1.35872e-23	96.8347	314.524	-3.01654	2.65492e-22	Y	Y	101.249	96.9171	92.3384	106.6	85.8109	87.9443	339.242	338.447	265.883
ENSG00000172159	ENSG00000172159	FERM domain containing 3 [Source:HGNC Symbol;Acc:HGNC:24125]	FRMD3	213.378	57.9561	3.27975	1.85525e-23	405.099	57.9561	6.04824	4.8605e-54	Y	Y	424.334	418.995	371.967	251.272	201.747	187.116	57.649	66.648	49.5714
ENSG00000184985	ENSG00000184985	sortilin related VPS10 domain containing receptor 2 [Source:HGNC Symbol;Acc:HGNC:16698]	SORCS2	1727.35	4490.35	-2.49679	2.08803e-23	1725.47	4490.35	-2.49873	2.09099e-23	Y	Y	1820.2	1729.82	1626.38	2100.46	1701.61	1379.98	4494.4	4949.65	4027
ENSG00000163743	ENSG00000163743	ring finger and CHY zinc finger domain containing 1 [Source:HGNC Symbol;Acc:HGNC:17479]	RCHY1	901.205	1885.16	-2.05403	2.32849e-23	860.529	1885.16	-2.14579	4.61546e-26	Y	Y	832.741	842.885	905.962	983.335	875.454	844.827	1975.59	1647.45	2032.43
ENSG00000166396	ENSG00000166396	serpin family B member 7 [Source:HGNC Symbol;Acc:HGNC:13902]	SERPINB7	1413.35	541.186	2.50082	2.33796e-23	1471.61	541.186	2.60029	2.63653e-25	Y	Y	1585.85	1411.66	1417.31	1687.12	1402.19	1150.76	569.838	483.198	570.521
ENSG00000197442	ENSG00000197442	mitogen-activated protein kinase kinase kinase 5 [Source:HGNC Symbol;Acc:HGNC:6857]	MAP3K5	1979.88	876.857	2.19979	2.68545e-23	1827.26	876.857	2.03578	5.55493e-19	Y	Y	1888.46	1755.28	1838.06	2278.86	2000.12	1660.65	931.252	887.251	812.069
ENSG00000184060	ENSG00000184060	ArfGAP with dual PH domains 2 [Source:HGNC Symbol;Acc:HGNC:16487]	ADAP2	137.672	23.4419	4.46417	3.48574e-23	237.466	23.4419	7.44007	1.19927e-40	Y	Y	241.176	252.572	218.65	170.778	115.936	126.303	23.2813	28.1171	18.9273
ENSG00000166321	ENSG00000166321	nudix hydrolase 13 [Source:HGNC Symbol;Acc:HGNC:18827]	NUDT13	172.014	31.255	4.36127	4.00685e-23	118.565	31.255	3.0897	8.13694e-14	Y	Y	136.515	115.517	103.663	184.919	153.364	177.76	21.064	31.2412	41.4597
ENSG00000137941	ENSG00000137941	tubulin tyrosine ligase like 7 [Source:HGNC Symbol;Acc:HGNC:26242]	TTLL7	504.674	204.236	2.38517	4.37442e-23	523.496	204.236	2.47165	6.00408e-25	Y	Y	546.06	513.954	510.475	548.231	515.778	450.013	216.184	220.771	175.753
ENSG00000169946	ENSG00000169946	zinc finger protein, FOG family member 2 [Source:HGNC Symbol;Acc:HGNC:16700]	ZFPM2	18.4287	145.765	-5.83481	4.81342e-23	10.9909	145.765	-8.21442	1.52274e-27	Y	Y	12.5139	11.7475	8.71117	17.4042	19.1705	18.7116	170.73	145.792	120.774
ENSG00000112655	ENSG00000112655	protein tyrosine kinase 7 (inactive) [Source:HGNC Symbol;Acc:HGNC:9618]	PTK7	389.273	1070.32	-2.62998	6.31638e-23	79.111	1070.32	-11.4518	6.22458e-112	Y	Y	92.1476	68.5273	76.6583	410.085	379.759	377.974	899.102	1293.39	1018.47
ENSG00000258734	ENSG00000258734	transmembrane protein 98 (TMEM98) pseudogene		156.631	31.6475	4.10463	7.89773e-23	98.495	31.6475	2.66902	2.69236e-11	Y	Y	95.5604	98.875	101.05	146.848	139.671	183.373	29.9331	34.3654	30.6441
ENSG00000179403	ENSG00000179403	von Willebrand factor A domain containing 1 [Source:HGNC Symbol;Acc:HGNC:30910]	VWA1	73.4917	341.062	-4.03701	7.9756e-23	16.8684	341.062	-12.7905	5.20783e-52	Y	Y	25.0277	10.7686	14.809	70.7044	72.1177	77.653	390.239	376.978	255.969
ENSG00000083454	ENSG00000083454	purinergic receptor P2X 5 [Source:HGNC Symbol;Acc:HGNC:8536]	P2RX5	225.199	57.6507	3.46879	8.78042e-23	227.793	57.6507	3.49944	4.85212e-23	Y	Y	261.654	206.561	215.166	228.43	227.308	219.861	70.9526	61.4411	40.5584
ENSG00000127252	ENSG00000127252	HRAS like suppressor [Source:HGNC Symbol;Acc:HGNC:14922]	HRASLS	100.207	4.11325	8.97999	1.0419e-22	109.231	4.11325	9.7295	6.33154e-24	Y	Y	108.074	111.602	108.019	100.074	99.5041	101.042	6.6518	2.08275	3.60519
ENSG00000168899	ENSG00000168899	vesicle associated membrane protein 5 [Source:HGNC Symbol;Acc:HGNC:12646]	VAMP5	327.968	712.441	-2.13221	1.29372e-22	44.7654	712.441	-13.4042	9.64175e-136	Y	Y	50.0555	37.2005	47.0403	339.381	342.331	302.192	713.96	718.548	704.815
ENSG00000134072	ENSG00000134072	calcium/calmodulin dependent protein kinase I [Source:HGNC Symbol;Acc:HGNC:1459]	CAMK1	1213.15	553.523	2.1415	1.66146e-22	1369.32	553.523	2.41018	7.08634e-30	Y	Y	1288.93	1424.39	1394.66	1265.06	1246.08	1128.31	606.423	593.583	460.563
ENSG00000002587	ENSG00000002587	heparan sulfate-glucosamine 3-sulfotransferase 1 [Source:HGNC Symbol;Acc:HGNC:5194]	HS3ST1	126.684	20.7863	4.6036	2.23924e-22	134.242	20.7863	4.86416	7.28286e-24	Y	Y	136.515	123.349	142.863	137.058	123.239	119.754	17.7381	30.1999	14.4208
ENSG00000145687	ENSG00000145687	single stranded DNA binding protein 2 [Source:HGNC Symbol;Acc:HGNC:15831]	SSBP2	123.149	23.1639	4.21264	4.57422e-22	148.35	23.1639	5.01769	1.86807e-27	Y	Y	149.029	148.802	147.219	129.443	130.542	109.463	24.3899	27.0757	18.026
ENSG00000164161	ENSG00000164161	hedgehog interacting protein [Source:HGNC Symbol;Acc:HGNC:14866]	HHIP	17.4651	134.14	-5.386	5.6919e-22	47.8004	134.14	-2.50089	2.13119e-08	Y	Y	54.606	54.8218	33.9736	16.3164	16.4319	19.6471	150.774	135.379	116.267
ENSG00000181804	ENSG00000181804	solute carrier family 9 member A9 [Source:HGNC Symbol;Acc:HGNC:20653]	SLC9A9	2.63193	126.529	-14.4249	7.64567e-22	6.55615	126.529	-10.2934	6.74556e-25	Y	Y	6.82575	5.87376	6.96894	3.26328	1.82576	2.80673	140.796	113.51	125.28
ENSG00000160606	ENSG00000160606	TLC domain containing 1 [Source:HGNC Symbol;Acc:HGNC:25177]	TLCD1	465.221	218.195	2.08205	1.00366e-21	457.317	218.195	2.04599	1.26369e-20	Y	Y	455.05	463.048	453.852	441.63	461.918	492.114	209.532	219.73	225.324
ENSG00000066056	ENSG00000066056	tyrosine kinase with immunoglobulin like and EGF like domains 1 [Source:HGNC Symbol;Acc:HGNC:11809]	TIE1	151.3	547.966	-3.29161	1.05292e-21	82.9201	547.966	-5.63371	1.10375e-41	Y	Y	104.661	66.5693	77.5294	176.217	157.929	119.754	539.905	642.528	461.464
ENSG00000064042	ENSG00000064042	LIM and calponin homology domains 1 [Source:HGNC Symbol;Acc:HGNC:29191]	LIMCH1	640.563	1310.78	-2.00828	1.43967e-21	597.979	1310.78	-2.14994	1.28331e-25	Y	Y	670.061	586.398	537.479	674.411	633.54	613.739	1375.81	1356.91	1199.63
ENSG00000138771	ENSG00000138771	shroom family member 3 [Source:HGNC Symbol;Acc:HGNC:30422]	SHROOM3	1690.82	3803.46	-2.18918	1.81691e-21	1552.83	3803.46	-2.37633	5.92784e-26	Y	Y	1658.66	1499.77	1500.06	1915.54	1794.73	1362.2	3802.61	4066.57	3541.2
ENSG00000184005	ENSG00000184005	ST6 N-acetylgalactosaminide alpha-2,6-sialyltransferase 3 [Source:HGNC Symbol;Acc:HGNC:19343]	ST6GALNAC3	1.2906	220.592	-28.6962	2.13293e-21	3.67422	220.592	-22.7817	5.69509e-33	Y	Y	5.68812	0.978961	4.35559	1.08776	0.912882	1.87116	247.225	220.771	193.779
ENSG00000140557	ENSG00000140557	ST8 alpha-N-acetyl-neuraminide alpha-2,8-sialyltransferase 2 [Source:HGNC Symbol;Acc:HGNC:10870]	ST8SIA2	353.798	1.0171	31.3311	2.17578e-21	119.243	1.0171	11.5185	2.58096e-14	Y	Y	120.588	120.412	116.73	457.947	338.679	264.769	1.10863	1.04137	0.901298
ENSG00000184178	ENSG00000184178	sec1 family domain containing 2 [Source:HGNC Symbol;Acc:HGNC:30676]	SCFD2	339.068	799.492	-2.28051	2.80281e-21	303.405	799.492	-2.53756	1.53881e-26	Y	Y	277.58	318.162	314.473	279.554	359.675	377.974	761.631	777.907	858.937
ENSG00000109452	ENSG00000109452	inositol polyphosphate-4-phosphatase type II B [Source:HGNC Symbol;Acc:HGNC:6075]	INPP4B	557.047	1382.32	-2.38884	3.57071e-21	200.069	1382.32	-6.3198	2.81584e-84	Y	Y	241.176	183.066	175.966	460.122	624.411	586.607	1300.43	1455.84	1390.7
ENSG00000155893	ENSG00000155893	2-phosphoxylose phosphatase 1 [Source:HGNC Symbol;Acc:HGNC:26303]	PXYLP1	247.637	81.0009	2.80958	3.59636e-21	310.254	81.0009	3.48458	6.559e-31	Y	Y	329.911	306.415	294.438	265.413	249.217	228.281	66.518	79.1444	97.3401
ENSG00000136098	ENSG00000136098	NIMA related kinase 3 [Source:HGNC Symbol;Acc:HGNC:7746]	NEK3	254.551	70.8706	3.22635	4.2365e-21	201.399	70.8706	2.59474	4.70465e-14	Y	Y	192.259	196.771	215.166	279.554	284.819	199.278	80.9303	67.6893	63.9921
ENSG00000182378	ENSG00000182378	phosphatidylinositol specific phospholipase C X domain containing 1 [Source:HGNC Symbol;Acc:HGNC:23148]	PLCXD1	255.477	566.612	-2.16599	4.70953e-21	276.967	566.612	-2.00029	3.26022e-17	Y	Y	285.544	269.214	276.144	292.607	246.478	227.345	550.991	587.335	561.508
ENSG00000153898	ENSG00000153898	mucolipin 2 [Source:HGNC Symbol;Acc:HGNC:13357]	MCOLN2	102.25	11.2569	5.56357	5.35245e-21	90.8624	11.2569	4.97061	1.45623e-18	Y	Y	104.661	85.1696	82.7561	84.8452	105.894	116.012	9.9777	9.37237	14.4208
ENSG00000267453	ENSG00000267453	long intergenic non-protein coding RNA 1835 [Source:HGNC Symbol;Acc:HGNC:52651]	LINC01835	145.244	1.94267	13.5557	5.66921e-21	85.7252	1.94267	8.41073	4.40169e-16	Y	Y	108.074	72.4431	76.6583	176.217	136.019	123.496	0	3.12412	2.70389
ENSG00000197134	ENSG00000197134	zinc finger protein 257 [Source:HGNC Symbol;Acc:HGNC:13498]	ZNF257	165.324	36.8277	3.67056	6.29802e-21	342.277	36.8277	7.26472	8.346e-48	Y	Y	361.765	335.784	329.282	203.411	161.58	130.981	26.6072	40.6136	43.2623
ENSG00000205426	ENSG00000205426	keratin 81 [Source:HGNC Symbol;Acc:HGNC:6458]	KRT81	435.088	1240.6	-2.69739	6.29802e-21	138.382	1240.6	-7.7985	4.75428e-79	Y	Y	171.781	105.728	137.637	502.545	451.877	350.842	1310.41	1282.97	1128.42
ENSG00000173156	ENSG00000173156	ras homolog family member D [Source:HGNC Symbol;Acc:HGNC:670]	RHOD	1.34133	207.858	-28.4654	6.66227e-21	0.871117	207.858	-29.3897	8.81757e-18	Y	Y	0	0	2.61335	2.17552	0.912882	0.935578	227.27	212.44	183.865
ENSG00000205269	ENSG00000205269	transmembrane protein 170B [Source:HGNC Symbol;Acc:HGNC:34244]	TMEM170B	352.49	125.184	2.64235	7.73889e-21	298.472	125.184	2.25407	1.36515e-14	Y	Y	307.159	271.172	317.087	350.259	379.759	327.452	98.6684	135.379	141.504
ENSG00000134115	ENSG00000134115	contactin 6 [Source:HGNC Symbol;Acc:HGNC:2176]	CNTN6	5.82171	107.918	-9.14472	8.37755e-21	1.85008	107.918	-12.8958	1.49871e-17	Y	Y	0	2.93688	2.61335	5.4388	5.47729	6.54905	92.0166	128.089	103.649
ENSG00000204977	ENSG00000204977	tripartite motif containing 13 [Source:HGNC Symbol;Acc:HGNC:9976]	TRIM13	287.328	104.106	2.60779	1.00919e-20	265.796	104.106	2.42381	1.29016e-17	Y	Y	243.452	291.73	262.206	298.046	272.039	291.9	119.732	91.6409	100.945
ENSG00000019186	ENSG00000019186	cytochrome P450 family 24 subfamily A member 1 [Source:HGNC Symbol;Acc:HGNC:2602]	CYP24A1	40.1205	568.926	-6.83498	1.25671e-20	82.0777	568.926	-4.31495	5.68176e-12	Y	Y	98.9733	63.6325	83.6272	18.4919	41.9926	59.877	461.192	556.094	689.493
ENSG00000140538	ENSG00000140538	neurotrophic receptor tyrosine kinase 3 [Source:HGNC Symbol;Acc:HGNC:8033]	NTRK3	975.717	265.452	3.26609	1.57074e-20	888.693	265.452	2.99823	1.02982e-17	Y	Y	695.088	937.844	1033.14	839.75	935.704	1151.7	195.12	255.137	346.098
ENSG00000203667	ENSG00000203667	cytochrome c oxidase assembly factor COX20 [Source:HGNC Symbol;Acc:HGNC:26970]	COX20	836.106	369.248	2.19656	1.69935e-20	783.724	369.248	2.06331	2.28958e-17	Y	Y	739.456	776.316	835.401	748.379	860.848	899.091	394.674	309.288	403.781
ENSG00000166770	ENSG00000166770	ZNF667 antisense RNA 1 (head to head) [Source:HGNC Symbol;Acc:HGNC:44321]	ZNF667-AS1	286.741	107.285	2.52136	1.90591e-20	300.002	107.285	2.63589	2.12714e-22	Y	Y	290.094	285.857	324.056	282.817	294.861	282.545	92.0166	107.262	122.576
ENSG00000101096	ENSG00000101096	nuclear factor of activated T cells 2 [Source:HGNC Symbol;Acc:HGNC:7776]	NFATC2	17.7566	117.406	-4.94849	2.4691e-20	30.9687	117.406	-3.23258	8.03162e-13	Y	Y	31.8535	32.3057	28.7469	21.7552	11.8675	19.6471	117.515	116.634	118.07
ENSG00000128242	ENSG00000128242	galactose-3-O-sulfotransferase 1 [Source:HGNC Symbol;Acc:HGNC:24240]	GAL3ST1	1936.66	835.464	2.24317	3.86757e-20	1836.05	835.464	2.13127	1.08524e-17	Y	Y	1678	2062.67	1767.5	1976.46	1938.96	1894.55	776.044	1017.42	712.926
ENSG00000269113	ENSG00000269113	TraB domain containing 2B [Source:HGNC Symbol;Acc:HGNC:44200]	TRABD2B	260.356	88.5896	2.73377	4.38727e-20	223.78	88.5896	2.36464	1.07458e-14	Y	Y	240.039	214.392	216.908	275.203	274.777	231.088	75.3871	102.055	88.3272
ENSG00000103811	ENSG00000103811	cathepsin H [Source:HGNC Symbol;Acc:HGNC:2535]	CTSH	135.321	550.017	-3.56397	5.06358e-20	72.3043	550.017	-6.09747	2.1496e-37	Y	Y	70.5327	71.4641	74.9161	171.866	142.41	91.6867	621.944	614.411	413.696
ENSG00000211448	ENSG00000211448	iodothyronine deiodinase 2 [Source:HGNC Symbol;Acc:HGNC:2884]	DIO2	5.88	96.6475	-7.85944	5.30101e-20	14.4366	96.6475	-4.76617	6.53924e-15	Y	Y	12.5139	18.6003	12.1956	6.52656	4.56441	6.54905	87.5821	90.5996	111.761
ENSG00000158106	ENSG00000158106	rhophilin Rho GTPase binding protein 1 [Source:HGNC Symbol;Acc:HGNC:19973]	RHPN1	560.767	206.931	2.56229	6.63798e-20	566.974	206.931	2.59265	2.41127e-20	Y	Y	589.289	530.597	581.035	690.727	494.782	496.792	230.596	207.233	182.963
ENSG00000137198	ENSG00000137198	guanosine monophosphate reductase [Source:HGNC Symbol;Acc:HGNC:4376]	GMPR	22.5518	153.39	-5.06191	1.01782e-19	12.1862	153.39	-7.70224	2.9811e-26	Y	Y	14.7891	7.83169	13.9379	14.1409	30.1251	23.3895	177.381	145.792	136.997
ENSG00000231298	ENSG00000231298	mitotically associated long non coding RNA [Source:HGNC Symbol;Acc:HGNC:44678]	MANCR	261.09	98.2792	2.49394	1.01782e-19	653.134	98.2792	6.04595	2.12371e-78	Y	Y	618.868	718.557	621.978	266.501	250.13	266.64	107.537	79.1444	108.156
ENSG00000100154	ENSG00000100154	tetratricopeptide repeat domain 28 [Source:HGNC Symbol;Acc:HGNC:29179]	TTC28	1194.46	544.036	2.13515	1.10031e-19	1219.53	544.036	2.17773	1.18846e-20	Y	Y	1317.37	1230.55	1110.67	1278.12	1241.52	1063.75	515.515	628.99	487.602
ENSG00000152527	ENSG00000152527	pleckstrin homology, MyTH4 and FERM domain containing H2 [Source:HGNC Symbol;Acc:HGNC:30506]	PLEKHH2	98.7996	16.9228	4.24972	1.12307e-19	155.735	16.9228	6.48352	8.66088e-32	Y	Y	170.644	153.697	142.863	96.8106	100.417	99.1713	12.195	18.7447	19.8285
ENSG00000171346	ENSG00000171346	keratin 15 [Source:HGNC Symbol;Acc:HGNC:6421]	KRT15	534.247	149.272	3.19033	1.171e-19	382.258	149.272	2.34228	7.57579e-11	Y	Y	447.086	341.657	358.029	692.903	508.475	401.363	158.535	127.048	162.234
ENSG00000183671	ENSG00000183671	G protein-coupled receptor 1 [Source:HGNC Symbol;Acc:HGNC:4463]	GPR1	29.9051	168.768	-4.42438	1.23029e-19	55.6287	168.768	-2.66749	9.11927e-10	Y	Y	61.4317	55.8008	49.6537	44.5981	29.2122	15.9048	166.295	162.454	177.556
ENSG00000167925	ENSG00000167925	GH3 domain containing [Source:HGNC Symbol;Acc:HGNC:24438]	GHDC	408.176	176.357	2.23546	1.74092e-19	374.906	176.357	2.06022	1.07444e-15	Y	Y	387.93	370.047	366.74	452.508	407.145	364.875	178.49	187.447	163.135
ENSG00000138639	ENSG00000138639	Rho GTPase activating protein 24 [Source:HGNC Symbol;Acc:HGNC:25361]	ARHGAP24	25.7773	151.386	-4.67176	2.48341e-19	7.78953	151.386	-10.0254	2.43649e-29	Y	Y	6.82575	7.83169	8.71117	23.9307	34.6895	18.7116	164.078	153.082	136.997
ENSG00000165300	ENSG00000165300	SLIT and NTRK like family member 5 [Source:HGNC Symbol;Acc:HGNC:20295]	SLITRK5	80.4034	3.69886	7.39048	2.85757e-19	164.288	3.69886	14.3948	1.92177e-29	Y	Y	152.442	172.297	168.126	78.3187	71.2048	91.6867	3.3259	4.1655	3.60519
ENSG00000116106	ENSG00000116106	EPH receptor A4 [Source:HGNC Symbol;Acc:HGNC:3388]	EPHA4	207.247	64.9582	2.92181	3.67253e-19	157.431	64.9582	2.25595	3.91301e-11	Y	Y	137.653	183.066	151.574	202.323	214.527	204.892	66.518	69.7721	58.5843
ENSG00000163312	ENSG00000163312	helicase, POLQ like [Source:HGNC Symbol;Acc:HGNC:18536]	HELQ	238.328	518.008	-2.11499	4.43635e-19	242.398	518.008	-2.08198	2.84789e-18	Y	Y	235.488	240.824	250.882	218.64	243.739	252.606	526.601	468.618	558.805
ENSG00000135919	ENSG00000135919	serpin family E member 2 [Source:HGNC Symbol;Acc:HGNC:8951]	SERPINE2	2233.08	1064.94	2.04684	5.4143e-19	2180.83	1064.94	2.00118	8.42313e-18	Y	Y	2210.4	2135.11	2196.96	2608.45	2202.78	1888	1152.98	1068.45	973.401
ENSG00000142408	ENSG00000142408	calcium voltage-gated channel auxiliary subunit gamma 8 [Source:HGNC Symbol;Acc:HGNC:13628]	CACNG8	78.8313	282.47	-3.2615	6.54628e-19	18.7783	282.47	-10.3392	5.19994e-49	Y	Y	21.6149	14.6844	20.0357	83.7575	65.7275	87.0088	258.312	252.013	337.085
ENSG00000116667	ENSG00000116667	chromosome 1 open reading frame 21 [Source:HGNC Symbol;Acc:HGNC:15494]	C1orf21	64.2018	256.208	-3.58178	7.06546e-19	2.9877	256.208	-22.2231	1.35599e-33	Y	Y	3.41287	2.93688	2.61335	78.3187	69.379	44.9078	278.267	241.599	248.758
ENSG00000165025	ENSG00000165025	spleen associated tyrosine kinase [Source:HGNC Symbol;Acc:HGNC:11491]	SYK	507.639	0.600865	47.7044	7.39534e-19	123.727	0.600865	12.5516	7.02582e-12	Y	Y	131.964	115.517	123.699	401.383	535.862	585.672	0	0	1.8026
ENSG00000106078	ENSG00000106078	cordon-bleu WH2 repeat protein [Source:HGNC Symbol;Acc:HGNC:22199]	COBL	480.495	0.716669	59.0356	1.19587e-18	13.3308	0.716669	2.36327	0.000254371	Y	Y	13.6515	9.78961	16.5512	478.614	520.343	442.528	1.10863	1.04137	0
ENSG00000121316	ENSG00000121316	phospholipase B domain containing 1 [Source:HGNC Symbol;Acc:HGNC:26215]	PLBD1	96.4438	4.99213	7.47422	1.3717e-18	33.4365	4.99213	3.0456	1.42727e-07	Y	Y	44.3673	25.453	30.4891	72.8799	99.5041	116.947	5.54317	3.12412	6.30908
ENSG00000248587	ENSG00000248587	GDNF antisense RNA 1 [Source:HGNC Symbol;Acc:HGNC:43592]	GDNF-AS1	138.056	14.633	5.50414	1.41775e-18	61.2066	14.633	2.7772	1.29106e-07	Y	Y	70.5327	46.0112	67.076	199.06	115.936	99.1713	12.195	14.5792	17.1247
ENSG00000143198	ENSG00000143198	microsomal glutathione S-transferase 3 [Source:HGNC Symbol;Acc:HGNC:7064]	MGST3	2282.44	926.126	2.35928	1.65328e-18	2094.68	926.126	2.17391	3.22714e-15	Y	Y	2262.73	2026.45	1994.86	2589.96	2275.81	1981.55	1070.94	994.512	712.926
ENSG00000188761	ENSG00000188761	BCL2 like 15 [Source:HGNC Symbol;Acc:HGNC:33624]	BCL2L15	50.0753	184.643	-3.25621	2.06505e-18	64.0419	184.643	-2.64114	2.88662e-13	Y	Y	63.707	66.5693	61.8493	39.1593	48.3827	62.6837	197.337	171.827	184.766
ENSG00000261150	ENSG00000261150	epiplakin 1 [Source:HGNC Symbol;Acc:HGNC:15577]	EPPK1	17.478	193.001	-5.84674	2.26583e-18	59.7075	193.001	-2.54767	6.15905e-06	Y	Y	42.0921	57.7587	79.2717	10.8776	21.9092	19.6471	99.777	212.44	266.784
ENSG00000151892	ENSG00000151892	GDNF family receptor alpha 1 [Source:HGNC Symbol;Acc:HGNC:4243]	GFRA1	8874.55	22712.4	-2.44023	2.42841e-18	1051.15	22712.4	-18.2242	5.06824e-187	Y	Y	853.218	984.835	1315.39	7237.95	9913.9	9471.79	20439.9	24461.9	23235.5
ENSG00000164651	ENSG00000164651	Sp8 transcription factor [Source:HGNC Symbol;Acc:HGNC:19196]	SP8	165.889	1.38665	16.4271	2.5747e-18	39.5184	1.38665	4.72446	3.1636e-09	Y	Y	28.4406	43.0743	47.0403	120.741	192.618	184.309	2.21727	1.04137	0.901298
ENSG00000180815	ENSG00000180815	mitogen-activated protein kinase kinase kinase 15 [Source:HGNC Symbol;Acc:HGNC:31689]	MAP3K15	90.1613	4.09083	7.92902	2.8403e-18	31.8598	4.09083	3.24131	5.54932e-08	Y	Y	43.2297	24.474	27.8757	85.933	103.156	81.3953	5.54317	3.12412	3.60519
ENSG00000227398	ENSG00000227398	KIF9 antisense RNA 1 [Source:HGNC Symbol;Acc:HGNC:26822]	KIF9-AS1	103.179	275.505	-2.53267	4.2393e-18	126.415	275.505	-2.09703	3.62522e-12	Y	Y	125.139	139.991	114.116	110.951	103.156	95.429	251.66	280.13	294.724
ENSG00000196387	ENSG00000196387	zinc finger protein 140 [Source:HGNC Symbol;Acc:HGNC:12925]	ZNF140	124.417	335.676	-2.55864	6.13849e-18	120.41	335.676	-2.62303	1.10543e-18	Y	Y	118.313	117.475	125.441	153.374	112.284	107.591	361.415	310.33	335.283
ENSG00000110455	ENSG00000110455	1-aminocyclopropane-1-carboxylate synthase homolog (inactive) [Source:HGNC Symbol;Acc:HGNC:23989]	ACCS	140.183	326.353	-2.24773	6.68131e-18	140.021	326.353	-2.24702	8.69349e-18	Y	Y	142.203	126.286	151.574	141.409	136.932	142.208	322.612	323.867	332.579
ENSG00000181690	ENSG00000181690	PLAG1 zinc finger [Source:HGNC Symbol;Acc:HGNC:9045]	PLAG1	162.434	47.0908	3.05069	9.91508e-18	198.059	47.0908	3.67885	4.98873e-24	Y	Y	204.772	189.918	199.486	177.305	175.273	134.723	46.5626	54.1515	40.5584
ENSG00000179869	ENSG00000179869	ATP binding cassette subfamily A member 13 [Source:HGNC Symbol;Acc:HGNC:14638]	ABCA13	190.913	55.0179	3.07013	1.02654e-17	135.912	55.0179	2.24532	2.04302e-09	Y	Y	124.001	132.16	151.574	216.464	195.357	160.919	47.6713	55.1928	62.1895
ENSG00000167216	ENSG00000167216	katanin catalytic subunit A1 like 2 [Source:HGNC Symbol;Acc:HGNC:25387]	KATNAL2	190.576	69.7168	2.55057	1.47571e-17	226.422	69.7168	3.00923	2.73878e-24	Y	Y	234.351	211.456	233.459	194.709	188.967	188.051	72.0612	67.6893	69.3999
ENSG00000198691	ENSG00000198691	ATP binding cassette subfamily A member 4 [Source:HGNC Symbol;Acc:HGNC:34]	ABCA4	89.4637	9.15577	5.38309	1.81588e-17	68.4704	9.15577	4.26726	1.5159e-13	Y	Y	76.2208	57.7587	71.4316	114.215	83.0723	71.1039	7.76044	12.4965	7.21038
ENSG00000148082	ENSG00000148082	SHC adaptor protein 3 [Source:HGNC Symbol;Acc:HGNC:18181]	SHC3	980.341	472.5	2.02126	1.81617e-17	1057.05	472.5	2.17456	3.7293e-21	Y	Y	1141.04	1047.49	982.62	1126.92	977.697	836.407	472.278	487.363	457.859
ENSG00000103485	ENSG00000103485	quinolinate phosphoribosyltransferase [Source:HGNC Symbol;Acc:HGNC:9755]	QPRT	1066.77	2940.94	-2.58799	3.16771e-17	288.963	2940.94	-8.68264	5.02762e-83	Y	Y	357.214	237.887	271.789	858.242	1191.31	1150.76	2690.65	3589.62	2542.56
ENSG00000158125	ENSG00000158125	xanthine dehydrogenase [Source:HGNC Symbol;Acc:HGNC:12805]	XDH	163.68	34.0547	3.82266	3.23934e-17	86.1114	34.0547	2.14961	3.92051e-06	Y	Y	104.661	74.401	79.2717	203.411	134.194	153.435	25.4986	40.6136	36.0519
ENSG00000109220	ENSG00000109220	cysteine rich hydrophobic domain 2 [Source:HGNC Symbol;Acc:HGNC:1935]	CHIC2	251.943	531.103	-2.05038	3.3926e-17	210.288	531.103	-2.44528	2.13103e-25	Y	Y	222.974	215.371	192.517	236.044	279.342	240.444	569.838	519.646	503.825
ENSG00000220205	ENSG00000220205	vesicle associated membrane protein 2 [Source:HGNC Symbol;Acc:HGNC:12643]	VAMP2	1024.56	397.09	2.44072	3.71081e-17	862.859	397.09	2.07467	1.15299e-11	Y	Y	1001.11	745.968	841.499	1263.98	966.742	842.956	434.584	365.522	391.163
ENSG00000198133	ENSG00000198133	transmembrane protein 229B [Source:HGNC Symbol;Acc:HGNC:20130]	TMEM229B	22.8024	128.063	-4.36423	6.43703e-17	15.1501	128.063	-5.86193	1.24004e-21	Y	Y	21.6149	10.7686	13.0668	23.9307	17.3448	27.1318	137.471	132.255	114.465
ENSG00000167680	ENSG00000167680	semaphorin 6B [Source:HGNC Symbol;Acc:HGNC:10739]	SEMA6B	271.723	626.608	-2.22369	6.47551e-17	170.846	626.608	-3.4464	3.85144e-37	Y	Y	182.02	169.36	161.157	287.169	287.558	240.444	615.292	723.755	540.779
ENSG00000159184	ENSG00000159184	homeobox B13 [Source:HGNC Symbol;Acc:HGNC:5112]	HOXB13	73.5705	7.11971	5.42542	7.48597e-17	66.0748	7.11971	4.91384	3.3291e-15	Y	Y	73.9456	68.5273	55.7515	79.4065	73.9434	67.3616	7.76044	7.28962	6.30908
ENSG00000176485	ENSG00000176485	phospholipase A2 group XVI [Source:HGNC Symbol;Acc:HGNC:17825]	PLA2G16	906.945	267.736	3.0184	7.54921e-17	796.686	267.736	2.68213	1.48539e-13	Y	Y	850.943	749.884	789.232	1151.94	868.151	700.748	322.612	303.04	177.556
ENSG00000254486	ENSG00000254486	long intergenic non-protein coding RNA 2547 [Source:HGNC Symbol;Acc:HGNC:53582]	LINC02547	124.46	11.515	5.41005	1.1829e-16	79.3167	11.515	3.74607	5.08666e-11	Y	Y	86.4594	78.3169	73.1738	180.568	109.546	83.2665	12.195	18.7447	3.60519
ENSG00000230882	ENSG00000230882	hypothetical protein LOC285908 (LOC285908) pseudogene		158.239	48.895	2.88689	1.52938e-16	153.303	48.895	2.80103	1.43953e-15	Y	Y	158.13	161.529	140.25	168.603	143.322	162.791	41.0195	55.1928	50.4727
ENSG00000163449	ENSG00000163449	transmembrane protein 169 [Source:HGNC Symbol;Acc:HGNC:25130]	TMEM169	88.287	17.8225	3.74856	2.54972e-16	127.712	17.8225	5.25985	5.13964e-25	Y	Y	134.24	124.328	124.57	77.2309	92.2011	95.429	17.7381	17.7034	18.026
ENSG00000149557	ENSG00000149557	fasciculation and elongation protein zeta 1 [Source:HGNC Symbol;Acc:HGNC:3659]	FEZ1	1597.06	689.882	2.22331	2.77117e-16	1453.24	689.882	2.03194	6.15066e-13	Y	Y	1606.33	1405.79	1347.62	1901.4	1551.9	1337.88	761.631	732.086	575.929
ENSG00000102053	ENSG00000102053	zinc finger CCCH-type containing 12B [Source:HGNC Symbol;Acc:HGNC:17407]	ZC3H12B	88.726	10.6601	4.97411	2.83836e-16	56.4466	10.6601	3.36468	4.57812e-10	Y	Y	50.0555	54.8218	64.4627	75.0554	102.243	88.8799	8.86907	17.7034	5.40779
ENSG00000074527	ENSG00000074527	netrin 4 [Source:HGNC Symbol;Acc:HGNC:13658]	NTN4	575.225	273.97	2.04037	2.95271e-16	734.981	273.97	2.58612	1.19356e-28	Y	Y	803.163	673.525	728.254	624.374	597.025	504.277	296.005	278.047	247.857
ENSG00000117013	ENSG00000117013	potassium voltage-gated channel subfamily Q member 4 [Source:HGNC Symbol;Acc:HGNC:6298]	KCNQ4	95.1454	6.6792	6.04278	3.16216e-16	38.397	6.6792	2.88498	4.4698e-07	Y	Y	51.1931	27.4109	36.5869	133.794	72.1177	79.5241	7.76044	4.1655	8.11168
ENSG00000166510	ENSG00000166510	coiled-coil domain containing 68 [Source:HGNC Symbol;Acc:HGNC:24350]	CCDC68	219.171	79.283	2.55137	3.16551e-16	336.119	79.283	3.83462	2.62985e-33	Y	Y	354.939	332.847	320.571	246.921	230.959	179.631	84.2562	69.7721	83.8207
ENSG00000270504	ENSG00000270504	novel transcript, antisense to PXDC1		174.762	554.033	-2.87218	3.25523e-16	227.527	554.033	-2.26482	3.7169e-10	Y	Y	268.479	208.519	205.584	204.499	195.357	124.432	583.141	637.321	441.636
ENSG00000073849	ENSG00000073849	ST6 beta-galactoside alpha-2,6-sialyltransferase 1 [Source:HGNC Symbol;Acc:HGNC:10860]	ST6GAL1	0	223.865	-30.8678	3.36455e-16	4.04342	223.865	-20.2237	3.13539e-32	Y	Y	1.13762	4.8948	6.09782	0	0	0	205.097	285.337	181.161
ENSG00000165521	ENSG00000165521	echinoderm microtubule associated protein like 5 [Source:HGNC Symbol;Acc:HGNC:18197]	EML5	367.042	139.528	2.46068	3.83971e-16	454.941	139.528	3.01504	4.78441e-24	Y	Y	528.995	415.079	420.75	422.051	382.498	296.578	135.253	136.42	146.912
ENSG00000171813	ENSG00000171813	PWWP domain containing 2B [Source:HGNC Symbol;Acc:HGNC:25150]	PWWP2B	74.4427	243.428	-2.95879	5.30309e-16	72.1657	243.428	-3.02855	1.62469e-16	Y	Y	78.4961	66.5693	71.4316	96.8106	66.6404	59.877	240.574	277.006	212.706
ENSG00000118898	ENSG00000118898	periplakin [Source:HGNC Symbol;Acc:HGNC:9273]	PPL	3.40783	98.7967	-8.42658	5.64864e-16	5.86756	98.7967	-6.89557	5.68194e-15	Y	Y	6.82575	2.93688	7.84005	6.52656	1.82576	1.87116	128.602	108.303	59.4856
ENSG00000104783	ENSG00000104783	potassium calcium-activated channel subfamily N member 4 [Source:HGNC Symbol;Acc:HGNC:6293]	KCNN4	1575.2	673.527	2.24041	5.9164e-16	1536.36	673.527	2.18874	4.87779e-15	Y	Y	1588.12	1493.89	1527.07	1953.62	1435.05	1336.94	786.021	655.024	579.534
ENSG00000137251	ENSG00000137251	tubulointerstitial nephritis antigen [Source:HGNC Symbol;Acc:HGNC:14599]	TINAG	76.4376	4.60016	6.37903	7.58078e-16	35.2707	4.60016	3.33308	2.74966e-08	Y	Y	28.4406	46.0112	31.3602	66.3533	68.4661	94.4934	3.3259	4.1655	6.30908
ENSG00000213401	ENSG00000213401	MAGE family member A12 [Source:HGNC Symbol;Acc:HGNC:6799]	MAGEA12	59.6599	195.807	-3.02304	8.94821e-16	3.38385	195.807	-18.0558	1.03708e-31	Y	Y	5.68812	0.978961	3.48447	58.739	55.6858	64.5549	210.64	181.199	195.582
ENSG00000011677	ENSG00000011677	gamma-aminobutyric acid type A receptor alpha3 subunit [Source:HGNC Symbol;Acc:HGNC:4077]	GABRA3	4.82028	54.5518	-4.84998	1.1207e-15	314.52	54.5518	5.20888	4.98655e-39	Y		333.324	288.793	321.442	4.35104	7.30306	2.80673	57.649	51.0273	54.9792
ENSG00000198692	ENSG00000198692	eukaryotic translation initiation factor 1A Y-linked [Source:HGNC Symbol;Acc:HGNC:3252]	EIF1AY	442.476	945.254	-2.08252	1.20913e-15	2.57255	945.254	-69.1986	1.70226e-56	Y	Y	2.27525	1.95792	3.48447	439.455	484.74	403.234	1048.77	815.396	971.599
ENSG00000077264	ENSG00000077264	p21 (RAC1) activated kinase 3 [Source:HGNC Symbol;Acc:HGNC:8592]	PAK3	303.198	134.728	2.16078	1.39355e-15	290.723	134.728	2.0711	6.71393e-14	Y	Y	303.746	288.793	279.629	288.256	334.115	287.222	119.732	144.751	139.701
ENSG00000189195	ENSG00000189195	BTB domain containing 8 [Source:HGNC Symbol;Acc:HGNC:21019]	BTBD8	151.125	44.8237	2.9331	1.60771e-15	360.706	44.8237	6.63188	4.75636e-47	Y	Y	389.068	336.763	356.287	172.954	160.667	119.754	50.9972	51.0273	32.4467
ENSG00000065325	ENSG00000065325	glucagon like peptide 2 receptor [Source:HGNC Symbol;Acc:HGNC:4325]	GLP2R	26.7885	121.414	-3.66072	1.67968e-15	40.4984	121.414	-2.62778	1.34251e-09	Y	Y	40.9545	35.2426	45.2981	23.9307	25.5607	30.8741	121.95	139.544	102.748
ENSG00000166432	ENSG00000166432	zinc finger matrin-type 1 [Source:HGNC Symbol;Acc:HGNC:29377]	ZMAT1	29.3494	160.713	-4.25199	1.75893e-15	11.9747	160.713	-7.65201	4.00514e-25	Y	Y	10.2386	11.7475	13.9379	44.5981	20.9963	22.4539	160.752	131.213	190.174
ENSG00000174482	ENSG00000174482	leucine rich repeat and Ig domain containing 2 [Source:HGNC Symbol;Acc:HGNC:21207]	LINGO2	85.1787	6.44974	5.64931	1.79091e-15	50.8826	6.44974	3.69581	6.33642e-10	Y	Y	59.1565	42.0953	51.3959	121.829	78.5078	55.1991	6.6518	7.28962	5.40779
ENSG00000164379	ENSG00000164379	forkhead box Q1 [Source:HGNC Symbol;Acc:HGNC:20951]	FOXQ1	174.226	56.2896	2.7763	1.86912e-15	234.853	56.2896	3.68434	5.80188e-25	Y	Y	240.039	207.54	256.98	202.323	172.535	147.821	58.7576	61.4411	48.6701
ENSG00000273812	ENSG00000273812	novel transcript		453.783	154.388	2.69619	1.89788e-15	350.696	154.388	2.12172	3.83096e-09	Y	Y	384.517	334.805	332.767	487.316	481.089	392.943	160.752	197.861	104.551
ENSG00000128872	ENSG00000128872	tropomodulin 2 [Source:HGNC Symbol;Acc:HGNC:11872]	TMOD2	68.7373	5.15619	5.73596	1.9612e-15	44.8533	5.15619	3.97871	1.09844e-10	Y	Y	38.6792	47.9691	47.9114	73.9677	62.076	70.1684	1.10863	6.24825	8.11168
ENSG00000182636	ENSG00000182636	necdin, MAGE family member [Source:HGNC Symbol;Acc:HGNC:7675]	NDN	145.741	30.5376	4.00585	2.03155e-15	1.90297	30.5376	-3.83026	1.28995e-08	Y		1.13762	1.95792	2.61335	129.443	151.538	156.242	35.4763	35.4067	20.7298
ENSG00000082458	ENSG00000082458	discs large MAGUK scaffold protein 3 [Source:HGNC Symbol;Acc:HGNC:2902]	DLG3	219.08	73.0884	2.7267	2.79538e-15	251.031	73.0884	3.10092	2.76292e-19	Y	Y	260.516	240.824	251.753	252.36	197.183	207.698	94.2339	71.8548	53.1766
ENSG00000146411	ENSG00000146411	solute carrier family 2 member 12 [Source:HGNC Symbol;Acc:HGNC:18067]	SLC2A12	195.879	651.094	-2.95827	2.91103e-15	213.773	651.094	-2.73997	2.67429e-13	Y	Y	262.791	178.171	200.357	220.815	222.743	144.079	644.116	814.355	494.812
ENSG00000165685	ENSG00000165685	transmembrane protein 52B [Source:HGNC Symbol;Acc:HGNC:26438]	TMEM52B	21.1492	123.082	-4.22698	3.24477e-15	29.4716	123.082	-3.31181	3.19766e-11	Y	Y	28.4406	22.5161	37.458	15.2286	17.3448	30.8741	111.972	143.71	113.564
ENSG00000108771	ENSG00000108771	DExH-box helicase 58 [Source:HGNC Symbol;Acc:HGNC:29517]	DHX58	311.589	57.4713	3.97002	3.27452e-15	188.503	57.4713	2.59163	9.1354e-08	Y	Y	246.864	172.297	146.348	466.649	250.13	217.99	62.0835	69.7721	40.5584
ENSG00000156103	ENSG00000156103	matrix metallopeptidase 16 [Source:HGNC Symbol;Acc:HGNC:7162]	MMP16	785.471	2131.03	-2.52979	3.58834e-15	499.469	2131.03	-3.84208	8.31847e-31	Y	Y	432.297	536.471	529.639	524.3	855.37	976.744	2047.65	2039.01	2306.42
ENSG00000162745	ENSG00000162745	olfactomedin like 2B [Source:HGNC Symbol;Acc:HGNC:24558]	OLFML2B	497.011	233.236	2.0641	3.72004e-15	658.937	233.236	2.71161	1.86889e-28	Y	Y	623.418	708.768	644.627	542.792	506.649	441.593	266.072	235.351	198.285
ENSG00000197632	ENSG00000197632	serpin family B member 2 [Source:HGNC Symbol;Acc:HGNC:8584]	SERPINB2	41.0639	171.297	-3.44493	5.10011e-15	77.1866	171.297	-2.03471	7.74157e-06	Y	Y	75.0832	99.854	56.6226	44.5981	37.4282	41.1654	177.381	136.42	200.088
ENSG00000260442	ENSG00000260442	ATP2A1 antisense RNA 1 [Source:HGNC Symbol;Acc:HGNC:51370]	ATP2A1-AS1	75.8169	245.426	-2.90365	5.67889e-15	52.4367	245.426	-4.02788	1.95228e-23	Y	Y	59.1565	60.6956	37.458	62.0023	81.2465	84.202	266.072	259.302	210.904
ENSG00000105784	ENSG00000105784	RUN domain containing 3B [Source:HGNC Symbol;Acc:HGNC:30286]	RUNDC3B	68.0151	6.30966	5.30044	6.48044e-15	41.655	6.30966	3.46233	2.70639e-09	Y	Y	43.2297	38.1795	43.5559	54.388	76.6821	72.9751	6.6518	4.1655	8.11168
ENSG00000254300	ENSG00000254300	long intergenic non-protein coding RNA 1111 [Source:HGNC Symbol;Acc:HGNC:49237]	LINC01111	88.6322	252.433	-2.63454	8.10867e-15	62.429	252.433	-3.58166	1.68167e-23	Y	Y	52.3307	62.6535	72.3027	79.4065	100.417	86.0732	260.529	215.564	281.205
ENSG00000235750	ENSG00000235750	KIAA0040 [Source:HGNC Symbol;Acc:HGNC:28950]	KIAA0040	113.671	29.2678	3.24538	9.68331e-15	70.4013	29.2678	2.0951	3.18814e-06	Y	Y	69.3951	69.5062	72.3027	109.864	110.459	120.69	22.1727	32.2826	33.348
ENSG00000100060	ENSG00000100060	MFNG O-fucosylpeptide 3-beta-N-acetylglucosaminyltransferase [Source:HGNC Symbol;Acc:HGNC:7038]	MFNG	396.012	117.089	2.95482	9.80064e-15	334.868	117.089	2.53823	4.67927e-11	Y	Y	298.058	340.678	365.869	350.259	358.763	479.016	111.972	77.0617	162.234
ENSG00000100228	ENSG00000100228	RAB36, member RAS oncogene family [Source:HGNC Symbol;Acc:HGNC:9775]	RAB36	2.00821	80.4868	-10.7172	9.87391e-15	0.290372	80.4868	-12.982	1.68476e-09	Y	Y	0	0	0.871117	3.26328	1.82576	0.935578	85.3648	74.979	81.1168
ENSG00000079337	ENSG00000079337	Rap guanine nucleotide exchange factor 3 [Source:HGNC Symbol;Acc:HGNC:16629]	RAPGEF3	603.204	1431.9	-2.26193	1.03893e-14	458.185	1431.9	-2.93161	1.02469e-24	Y	Y	464.151	530.597	379.807	537.353	569.638	702.619	1624.15	1501.66	1169.88
ENSG00000197016	ENSG00000197016	zinc finger protein 470 [Source:HGNC Symbol;Acc:HGNC:22220]	ZNF470	249.345	107.375	2.21006	1.04793e-14	241.198	107.375	2.14368	1.42509e-13	Y	Y	235.488	247.677	240.428	263.238	219.092	265.704	103.103	107.262	111.761
ENSG00000136114	ENSG00000136114	thrombospondin type 1 domain containing 1 [Source:HGNC Symbol;Acc:HGNC:17754]	THSD1	539.987	243.545	2.12738	1.12619e-14	706.672	243.545	2.75571	3.87889e-26	Y	Y	725.804	723.452	670.76	645.041	524.907	450.013	226.161	272.84	231.633
ENSG00000138738	ENSG00000138738	PR/SET domain 5 [Source:HGNC Symbol;Acc:HGNC:9349]	PRDM5	59.0696	177.337	-2.75004	1.18017e-14	42.9074	177.337	-3.62068	1.9229e-21	Y	Y	42.0921	43.0743	43.5559	60.9145	63.9017	52.3924	196.228	164.537	171.247
ENSG00000111344	ENSG00000111344	RAS protein activator like 1 [Source:HGNC Symbol;Acc:HGNC:9873]	RASAL1	23.9052	128.562	-4.09606	1.40261e-14	14.7249	128.562	-5.71507	7.83346e-20	Y	Y	14.7891	13.7055	15.6801	20.6674	16.4319	34.6164	105.32	147.875	132.491
ENSG00000129354	ENSG00000129354	adaptor related protein complex 1 subunit mu 2 [Source:HGNC Symbol;Acc:HGNC:558]	AP1M2	388.926	819.835	-2.03948	1.69713e-14	391.592	819.835	-2.03137	2.67804e-14	Y	Y	423.196	385.711	365.869	326.328	364.24	476.209	844.779	827.893	786.833
ENSG00000204991	ENSG00000204991	spire type actin nucleation factor 2 [Source:HGNC Symbol;Acc:HGNC:30623]	SPIRE2	320.684	148.968	2.07606	2.31447e-14	373.644	148.968	2.40944	1.1308e-20	Y	Y	331.049	409.206	380.678	324.152	307.641	330.259	145.231	165.579	136.096
ENSG00000162746	ENSG00000162746	Fc receptor like B [Source:HGNC Symbol;Acc:HGNC:26431]	FCRLB	153.077	37.9332	3.29528	2.77537e-14	133.437	37.9332	2.91685	1.22163e-11	Y	Y	153.579	112.58	134.152	203.411	134.194	121.625	41.0195	38.5308	34.2493
ENSG00000067646	ENSG00000067646	zinc finger protein Y-linked [Source:HGNC Symbol;Acc:HGNC:12870]	ZFY	148.262	363.691	-2.35158	2.88216e-14	0.871117	363.691	-36.188	3.12515e-22	Y	Y	0	0	2.61335	125.092	161.58	158.113	334.807	362.398	393.867
ENSG00000154165	ENSG00000154165	G protein-coupled receptor 15 [Source:HGNC Symbol;Acc:HGNC:4469]	GPR15	38.5486	150.316	-3.28287	3.22657e-14	55.2102	150.316	-2.41164	1.51287e-08	Y	Y	39.8169	58.7376	67.076	43.5104	33.7766	38.3587	138.579	178.075	134.293
ENSG00000172915	ENSG00000172915	neurobeachin [Source:HGNC Symbol;Acc:HGNC:7648]	NBEA	608.049	266.057	2.1771	3.53849e-14	602.288	266.057	2.15642	8.25456e-14	Y	Y	671.198	558.987	576.68	646.129	597.025	580.994	203.989	269.716	324.467
ENSG00000049089	ENSG00000049089	collagen type IX alpha 2 chain [Source:HGNC Symbol;Acc:HGNC:2218]	COL9A2	22.8433	118.293	-3.83741	3.6589e-14	49.6143	118.293	-2.10446	2.58084e-05	Y	Y	44.3673	54.8218	49.6537	19.5797	25.5607	23.3895	133.036	141.627	80.2155
ENSG00000203727	ENSG00000203727	sterile alpha motif domain containing 5 [Source:HGNC Symbol;Acc:HGNC:21180]	SAMD5	47.8241	190.141	-3.40898	3.83882e-14	3.84188	190.141	-15.4085	1.2221e-30	Y	Y	2.27525	4.8948	4.35559	32.6328	57.5116	53.328	223.944	177.034	169.444
ENSG00000250303	ENSG00000250303	uncharacterized LOC283140 [Source:NCBI gene;Acc:283140]		84.6106	244.199	-2.64269	4.01224e-14	86.2742	244.199	-2.6106	9.33238e-14	Y	Y	103.524	81.2537	74.045	84.8452	89.4624	79.5241	276.05	258.261	198.285
ENSG00000225383	ENSG00000225383	surfactant associated 1, pseudogene [Source:HGNC Symbol;Acc:HGNC:18383]	SFTA1P	352.042	823.574	-2.23174	4.01224e-14	216.908	823.574	-3.52226	2.21693e-32	Y	Y	278.718	166.423	205.584	317.626	400.755	337.744	851.431	821.644	797.648
ENSG00000127561	ENSG00000127561	synaptogyrin 3 [Source:HGNC Symbol;Acc:HGNC:11501]	SYNGR3	85.7773	13.1775	4.21061	4.0547e-14	61.9841	13.1775	3.17865	1.26019e-09	Y	Y	71.6703	48.948	65.3338	103.337	90.3753	63.6193	12.195	15.6206	11.7169
ENSG00000130038	ENSG00000130038	calcium release activated channel regulator 2A [Source:HGNC Symbol;Acc:HGNC:28657]	CRACR2A	235.009	503.018	-2.06668	5.23266e-14	196.242	503.018	-2.44785	2.33493e-20	Y	Y	169.506	207.54	211.681	200.148	239.175	265.704	463.409	510.273	535.371
ENSG00000172005	ENSG00000172005	mal, T cell differentiation protein [Source:HGNC Symbol;Acc:HGNC:6817]	MAL	188.646	69.5356	2.48734	5.57608e-14	254.889	69.5356	3.31832	5.55822e-24	Y	Y	233.213	237.887	293.566	213.201	187.141	165.597	65.4094	72.8962	70.3012
ENSG00000050438	ENSG00000050438	solute carrier family 4 member 8 [Source:HGNC Symbol;Acc:HGNC:11034]	SLC4A8	8.82372	105.63	-5.90182	5.96885e-14	2.95175	105.63	-8.89466	2.12419e-16	Y	Y	3.41287	1.95792	3.48447	3.26328	7.30306	15.9048	67.6267	117.675	131.589
ENSG00000002079	ENSG00000002079	myosin heavy chain 16 pseudogene [Source:HGNC Symbol;Acc:HGNC:31038]	MYH16	136.516	32.7611	3.32372	6.13473e-14	124.531	32.7611	3.07366	2.9995e-12	Y	Y	92.1476	135.097	146.348	141.409	127.803	140.337	19.9554	39.5722	38.7558
ENSG00000131037	ENSG00000131037	EPS8 like 1 [Source:HGNC Symbol;Acc:HGNC:21295]	EPS8L1	32.8942	132.293	-3.46283	7.20396e-14	6.69787	132.293	-9.77462	2.13699e-27	Y	Y	9.10099	4.8948	6.09782	41.3349	26.4736	30.8741	129.71	130.172	136.997
ENSG00000256804	ENSG00000256804	placenta-specific 8 (PLAC8) pseudogene		15.5584	104.441	-4.75502	8.30291e-14	0.290372	104.441	-13.5757	2.01693e-10	Y	Y	0	0	0.871117	15.2286	14.6061	16.8404	120.841	117.675	74.8077
ENSG00000121797	ENSG00000121797	C-C motif chemokine receptor like 2 [Source:HGNC Symbol;Acc:HGNC:1612]	CCRL2	40.5188	162.338	-3.31726	8.42734e-14	46.527	162.338	-2.99139	8.28304e-12	Y	Y	59.1565	42.0953	38.3292	33.7205	41.9926	45.8433	197.337	163.496	126.182
ENSG00000160284	ENSG00000160284	spermatogenesis and centriole associated 1 like [Source:HGNC Symbol;Acc:HGNC:1298]	SPATC1L	104.127	25.1532	3.34408	8.62198e-14	80.5439	25.1532	2.64348	3.31417e-09	Y	Y	93.2852	65.5904	82.7561	98.9861	109.546	103.849	24.3899	31.2412	19.8285
ENSG00000213213	ENSG00000213213	coiled-coil domain containing 183 [Source:HGNC Symbol;Acc:HGNC:28236]	CCDC183	90.6098	9.68411	4.69381	8.99006e-14	69.7908	9.68411	3.79167	9.14386e-11	Y	Y	89.8723	56.7797	62.7204	131.619	80.3336	59.877	14.4122	8.33099	6.30908
ENSG00000139629	ENSG00000139629	polypeptide N-acetylgalactosaminyltransferase 6 [Source:HGNC Symbol;Acc:HGNC:4128]	GALNT6	156.472	354.968	-2.17817	9.02484e-14	105.954	354.968	-3.12907	1.05993e-26	Y	Y	117.175	97.8961	102.792	172.954	155.19	141.272	352.546	397.805	314.553
ENSG00000262160	ENSG00000262160	novel transcript, antisense to NFATC3		57.4996	4.57774	5.09969	9.38415e-14	72.6918	4.57774	6.23767	2.16371e-16	Y	Y	89.8723	64.6114	63.5916	58.739	52.9472	60.8126	2.21727	5.20687	6.30908
ENSG00000182326	ENSG00000182326	complement C1s [Source:HGNC Symbol;Acc:HGNC:1247]	C1S	21.8086	123.091	-4.06909	9.55309e-14	28.1058	123.091	-3.37517	8.42732e-11	Y	Y	29.5782	30.3478	24.3913	29.3695	17.3448	18.7116	154.1	132.255	82.9194
ENSG00000122877	ENSG00000122877	early growth response 2 [Source:HGNC Symbol;Acc:HGNC:3239]	EGR2	90.9087	11.5352	4.45473	9.71733e-14	67.8098	11.5352	3.50984	3.34405e-10	Y	Y	40.9545	91.0434	71.4316	117.478	77.595	77.653	12.195	12.4965	9.91427
ENSG00000196460	ENSG00000196460	RFX family member 8, lacking RFX DNA binding domain [Source:HGNC Symbol;Acc:HGNC:37253]	RFX8	142.928	21.4258	4.20428	1.01726e-13	82.0656	21.4258	2.6633	4.90126e-07	Y	Y	95.5604	62.6535	87.9828	201.236	142.41	85.1376	19.9554	14.5792	29.7428
ENSG00000114757	ENSG00000114757	peroxisomal biogenesis factor 5 like [Source:HGNC Symbol;Acc:HGNC:30024]	PEX5L	325.627	102.309	2.81614	1.21889e-13	252.533	102.309	2.23322	1.79695e-08	Y	Y	307.159	237.887	212.553	423.138	305.815	247.928	116.407	103.096	87.4259
ENSG00000184012	ENSG00000184012	transmembrane serine protease 2 [Source:HGNC Symbol;Acc:HGNC:11876]	TMPRSS2	367.34	41.1457	4.37644	1.39268e-13	409.438	41.1457	4.75445	7.36488e-15	Y	Y	470.976	398.437	358.9	554.757	303.077	244.186	54.3231	44.7791	24.335
ENSG00000233639	ENSG00000233639	POU3F3 adjacent non-coding transcript 1 [Source:HGNC Symbol;Acc:HGNC:49513]	PANTR1	112.246	26.8566	3.29507	1.52161e-13	113.827	26.8566	3.35045	7.48115e-14	Y	Y	104.661	117.475	119.343	137.058	96.7655	102.914	27.7158	17.7034	35.1506
ENSG00000180861	ENSG00000180861	long intergenic non-protein coding RNA 1559 [Source:HGNC Symbol;Acc:HGNC:26598]	LINC01559	130.007	37.0242	2.98129	1.72971e-13	143.8	37.0242	3.27181	1.05285e-15	Y	Y	137.653	136.076	157.672	120.741	119.588	149.693	46.5626	23.9516	40.5584
ENSG00000095777	ENSG00000095777	myosin IIIA [Source:HGNC Symbol;Acc:HGNC:7601]	MYO3A	112.099	0	13.9475	1.90233e-13	157.027	0	19.1923	8.45662e-15	Y	Y	154.717	167.402	148.961	121.829	104.069	110.398	0	0	0
ENSG00000145284	ENSG00000145284	stearoyl-CoA desaturase 5 [Source:HGNC Symbol;Acc:HGNC:21088]	SCD5	45.2172	170.394	-3.22156	2.40843e-13	20.7	170.394	-5.78886	5.39353e-25	Y	Y	11.3762	17.6213	33.1025	41.3349	44.7312	49.5856	158.535	175.992	176.654
ENSG00000132357	ENSG00000132357	caspase recruitment domain family member 6 [Source:HGNC Symbol;Acc:HGNC:16394]	CARD6	114.903	276.82	-2.27172	2.78493e-13	131.65	276.82	-2.00944	5.70565e-10	Y	Y	133.102	131.181	130.668	96.8106	114.11	133.788	296.005	294.709	239.745
ENSG00000230426	ENSG00000230426	endogenous retrovirus group MER61 member 1 [Source:HGNC Symbol;Acc:HGNC:27919]	ERVMER61-1	65.0055	8.73583	4.28036	2.78975e-13	66.5746	8.73583	4.34796	1.71729e-13	Y	Y	80.7713	59.7166	59.236	63.0901	74.8563	57.0703	11.0863	5.20687	9.91427
ENSG00000104892	ENSG00000104892	kinesin light chain 3 [Source:HGNC Symbol;Acc:HGNC:20717]	KLC3	69.3084	284.25	-3.32268	4.8514e-13	118.692	284.25	-2.12974	9.34816e-06	Y	Y	162.68	94.9592	98.4362	100.074	64.8146	43.0366	323.721	281.171	247.857
ENSG00000233384	ENSG00000233384	novel transcript		133.586	44.01	2.70382	4.85648e-13	156.481	44.01	3.12506	6.49305e-17	Y	Y	169.506	152.718	147.219	129.443	150.626	120.69	54.3231	41.655	36.0519
ENSG00000139971	ENSG00000139971	armadillo-like helical domain containing 4 [Source:HGNC Symbol;Acc:HGNC:19846]	ARMH4	783.242	323.445	2.27479	9.87055e-13	1350.76	323.445	3.7957	1.42505e-32	Y	Y	1474.36	1267.75	1310.16	996.388	770.472	582.865	352.546	344.695	273.093
ENSG00000128655	ENSG00000128655	phosphodiesterase 11A [Source:HGNC Symbol;Acc:HGNC:8773]	PDE11A	84.0938	11.0763	4.32017	9.92253e-13	51.6019	11.0763	2.8965	1.7627e-07	Y	Y	51.1931	46.9901	56.6226	101.162	93.114	58.0058	9.9777	18.7447	4.50649
ENSG00000141622	ENSG00000141622	ring finger protein 165 [Source:HGNC Symbol;Acc:HGNC:31696]	RNF165	13.2739	85.3336	-4.49967	1.19828e-12	1.9918	85.3336	-9.8571	1.89365e-15	Y	Y	2.27525	1.95792	1.74223	13.0531	14.6061	12.1625	100.886	67.6893	87.4259
ENSG00000111799	ENSG00000111799	collagen type XII alpha 1 chain [Source:HGNC Symbol;Acc:HGNC:2188]	COL12A1	2938.79	6145.19	-2.01813	1.22018e-12	2536.82	6145.19	-2.32128	8.17774e-18	Y	Y	2459.54	2554.11	2596.8	2318.02	3055.42	3442.93	5027.65	6380.5	7027.42
ENSG00000226835	ENSG00000226835	uncharacterized LOC107985092 [Source:NCBI gene;Acc:107985092]		87.5114	21.7975	3.17547	1.81648e-12	90.0978	21.7975	3.2722	4.78953e-13	Y	Y	81.909	96.9171	91.4673	100.074	88.5496	73.9107	22.1727	19.7861	23.4337
ENSG00000244486	ENSG00000244486	scavenger receptor class F member 2 [Source:HGNC Symbol;Acc:HGNC:19869]	SCARF2	6.67104	71.4833	-5.35545	1.91461e-12	5.45447	71.4833	-5.75747	5.84827e-13	Y	Y	3.41287	6.85273	6.09782	9.78984	2.73865	7.48463	52.1058	81.2272	81.1168
ENSG00000226752	ENSG00000226752	cutA divalent cation tolerance homolog-like, pseudogene [Source:HGNC Symbol;Acc:HGNC:27367]	CUTALP	252.3	119.567	2.02257	2.05633e-12	351.014	119.567	2.78213	5.09837e-26	Y	Y	348.113	325.994	378.936	258.887	251.955	246.057	104.212	136.42	118.07
ENSG00000162981	ENSG00000162981	family with sequence similarity 84 member A [Source:HGNC Symbol;Acc:HGNC:20743]	FAM84A	55.2963	6.05592	4.28697	2.08858e-12	98.6558	6.05592	7.14125	5.45548e-20	Y	Y	96.6981	100.833	98.4362	77.2309	46.557	42.101	6.6518	5.20687	6.30908
ENSG00000157601	ENSG00000157601	MX dynamin like GTPase 1 [Source:HGNC Symbol;Acc:HGNC:7532]	MX1	217.914	76.7073	2.54041	2.10418e-12	377.997	76.7073	4.24188	4.67661e-29	Y	Y	433.435	341.657	358.9	279.554	189.879	184.309	63.1921	88.5168	78.4129
ENSG00000160539	ENSG00000160539	phospholipid phosphatase 7 (inactive) [Source:HGNC Symbol;Acc:HGNC:28174]	PLPP7	121.843	314.566	-2.40502	2.38101e-12	143.072	314.566	-2.07048	7.46389e-09	Y	Y	152.442	124.328	152.446	157.725	108.633	99.1713	340.351	331.157	272.192
ENSG00000167771	ENSG00000167771	REST corepressor 2 [Source:HGNC Symbol;Acc:HGNC:27455]	RCOR2	35.4375	111.628	-2.70943	3.08462e-12	257.858	111.628	2.18659	7.98607e-10	Y		259.378	286.836	227.362	43.5104	32.8638	29.9385	125.276	117.675	91.9324
ENSG00000135925	ENSG00000135925	Wnt family member 10A [Source:HGNC Symbol;Acc:HGNC:13829]	WNT10A	61.7242	9.96397	3.87209	3.39616e-12	69.0974	9.96397	4.27358	1.00089e-13	Y	Y	64.8446	83.2117	59.236	64.1778	62.9889	58.0058	11.0863	12.4965	6.30908
ENSG00000178075	ENSG00000178075	GRAM domain containing 1C [Source:HGNC Symbol;Acc:HGNC:25252]	GRAMD1C	186.35	63.8645	2.59511	3.7366e-12	260.788	63.8645	3.54295	6.35444e-21	Y	Y	290.094	222.224	270.046	219.727	199.921	139.401	73.1698	56.2342	62.1895
ENSG00000151789	ENSG00000151789	zinc finger protein 385D [Source:HGNC Symbol;Acc:HGNC:26191]	ZNF385D	134.153	40.4045	2.83687	3.93992e-12	166.252	40.4045	3.4485	8.95735e-17	Y	Y	200.222	139.991	158.543	156.637	122.326	123.496	50.9972	39.5722	30.6441
ENSG00000196611	ENSG00000196611	matrix metallopeptidase 1 [Source:HGNC Symbol;Acc:HGNC:7155]	MMP1	1422.43	169.385	4.26015	6.61795e-12	527.627	169.385	2.08146	0.000594478	Y	Y	461.875	623.598	497.408	1793.72	1283.51	1190.06	286.028	96.8478	125.28
ENSG00000128536	ENSG00000128536	cadherin related family member 3 [Source:HGNC Symbol;Acc:HGNC:26308]	CDHR3	74.1207	16.4356	3.32926	7.58818e-12	71.1408	16.4356	3.20678	3.66452e-11	Y	Y	72.808	66.5693	74.045	71.7921	77.595	72.9751	12.195	14.5792	22.5324
ENSG00000169583	ENSG00000169583	chloride intracellular channel 3 [Source:HGNC Symbol;Acc:HGNC:2064]	CLIC3	0.623719	136.344	-17.1112	8.09342e-12	2.81003	136.344	-13.4776	1.42328e-20	Y	Y	1.13762	2.93688	4.35559	0	0	1.87116	114.189	188.489	106.353
ENSG00000177096	ENSG00000177096	PH domain containing endocytic trafficking adaptor 2 [Source:HGNC Symbol;Acc:HGNC:27161]	PHETA2	0.362587	142.051	-21.776	9.26131e-12	4.51146	142.051	-14.0724	1.6325e-26	Y	Y	3.41287	4.8948	5.2267	1.08776	0	0	147.448	148.917	129.787
ENSG00000133315	ENSG00000133315	MACRO domain containing 1 [Source:HGNC Symbol;Acc:HGNC:29598]	MACROD1	394.047	824.309	-2.01593	1.01937e-11	305.55	824.309	-2.56105	4.15701e-20	Y	Y	337.874	279.983	298.793	457.947	411.71	312.483	846.996	911.203	714.729
ENSG00000100027	ENSG00000100027	yippee like 1 [Source:HGNC Symbol;Acc:HGNC:12845]	YPEL1	178.664	32.5768	3.67491	1.04719e-11	117.451	32.5768	2.61233	7.03879e-07	Y	Y	136.515	85.1696	130.668	269.764	167.057	99.1713	24.3899	42.6963	30.6441
ENSG00000260877	ENSG00000260877	novel transcript		85.0207	18.6307	3.41495	1.3949e-11	51.0361	18.6307	2.18985	2.72644e-05	Y	Y	54.606	40.1374	58.3649	71.7921	79.4207	103.849	21.064	17.7034	17.1247
ENSG00000129757	ENSG00000129757	cyclin dependent kinase inhibitor 1C [Source:HGNC Symbol;Acc:HGNC:1786]	CDKN1C	99.4979	715.494	-4.28008	1.4238e-11	63.4331	715.494	-5.71295	1.18461e-16	Y	Y	71.6703	56.7797	61.8493	120.741	113.197	64.5549	872.495	894.541	379.446
ENSG00000103316	ENSG00000103316	crystallin mu [Source:HGNC Symbol;Acc:HGNC:2418]	CRYM	65.1322	1.80288	6.19664	1.70588e-11	36.8725	1.80288	3.96713	2.91516e-08	Y	Y	48.9178	38.1795	23.5202	90.284	62.076	43.0366	3.3259	2.08275	0
ENSG00000246263	ENSG00000246263	UBR5 antisense RNA 1 [Source:HGNC Symbol;Acc:HGNC:51661]	UBR5-AS1	94.0454	25.2202	3.03635	1.76577e-11	62.8621	25.2202	2.12259	1.06648e-05	Y	Y	67.1198	50.906	70.5605	106.6	89.4624	86.0732	24.3899	26.0344	25.2363
ENSG00000280351	ENSG00000280351	uncharacterized LOC100129503 [Source:NCBI gene;Acc:100129503]		56.3384	8.11625	4.02934	1.76776e-11	40.0874	8.11625	3.01859	7.81524e-08	Y	Y	35.2664	44.0532	40.9425	54.388	55.6858	58.9414	5.54317	12.4965	6.30908
ENSG00000236924	ENSG00000236924	novel transcript		48.9983	3.48996	5.10309	2.38093e-11	25.4852	3.48996	2.99191	1.49053e-06	Y	Y	23.8901	26.4319	26.1335	44.5981	58.4244	43.9722	5.54317	3.12412	1.8026
ENSG00000041353	ENSG00000041353	RAB27B, member RAS oncogene family [Source:HGNC Symbol;Acc:HGNC:9767]	RAB27B	299.016	141.151	2.01976	2.96911e-11	621.556	141.151	4.07208	2.65124e-44	Y	Y	583.601	629.472	651.596	332.854	299.425	264.769	166.295	109.344	147.813
ENSG00000196411	ENSG00000196411	EPH receptor B4 [Source:HGNC Symbol;Acc:HGNC:3395]	EPHB4	57.657	154.899	-2.47367	3.05054e-11	32.5723	154.899	-4.04311	3.09473e-22	Y	Y	39.8169	27.4109	30.4891	56.5635	59.3373	57.0703	161.861	154.123	148.714
ENSG00000114638	ENSG00000114638	uroplakin 1B [Source:HGNC Symbol;Acc:HGNC:12578]	UPK1B	107.751	0.647557	11.8302	3.86476e-11	133.325	0.647557	14.3434	5.00446e-12	Y	Y	149.029	142.928	108.019	124.005	114.11	85.1376	0	1.04137	0.901298
ENSG00000147642	ENSG00000147642	syntabulin [Source:HGNC Symbol;Acc:HGNC:26011]	SYBU	57.7102	9.75478	3.54303	4.09308e-11	120.766	9.75478	6.79912	1.2556e-22	Y	Y	145.616	108.665	108.019	76.1432	50.2085	46.7789	9.9777	9.37237	9.91427
ENSG00000152580	ENSG00000152580	immunoglobulin superfamily member 10 [Source:HGNC Symbol;Acc:HGNC:26384]	IGSF10	99.3849	33.2191	2.59166	5.03327e-11	163.811	33.2191	4.141	7.72163e-24	Y	Y	156.992	165.444	168.997	113.127	83.9851	101.042	34.3676	36.4481	28.8415
ENSG00000196876	ENSG00000196876	sodium voltage-gated channel alpha subunit 8 [Source:HGNC Symbol;Acc:HGNC:10596]	SCN8A	31.4943	160.004	-3.64707	5.35701e-11	22.4277	160.004	-4.6127	1.25743e-14	Y	Y	18.202	26.4319	22.649	18.4919	29.2122	46.7789	100.886	171.827	207.298
ENSG00000139915	ENSG00000139915	MAM domain containing glycosylphosphatidylinositol anchor 2 [Source:HGNC Symbol;Acc:HGNC:19835]	MDGA2	140.589	0.347125	11.9562	5.42378e-11	26.9779	0.347125	3.38646	4.68708e-06	Y	Y	21.6149	24.474	34.8447	62.0023	167.97	191.794	0	1.04137	0
ENSG00000242366	ENSG00000242366	UDP glucuronosyltransferase family 1 member A8 [Source:HGNC Symbol;Acc:HGNC:12540]	UGT1A8	89.6436	249.603	-2.51809	5.52571e-11	73.5395	249.603	-2.97508	1.29174e-14	Y	Y	58.0188	76.3589	86.2406	92.4596	89.4624	87.0088	302.657	261.385	184.766
ENSG00000224271	ENSG00000224271	uncharacterized LOC284930 [Source:NCBI gene;Acc:284930]		49.5531	1.71135	6.0221	9.99961e-11	31.6334	1.71135	4.13181	4.12595e-08	Y	Y	35.2664	35.2426	24.3913	54.388	46.557	47.7145	1.10863	3.12412	0.901298
ENSG00000196296	ENSG00000196296	ATPase sarcoplasmic/endoplasmic reticulum Ca2+ transporting 1 [Source:HGNC Symbol;Acc:HGNC:811]	ATP2A1	92.2628	25.5428	2.90094	1.17524e-10	87.6798	25.5428	2.78211	7.17767e-10	Y	Y	87.5971	82.2327	93.2095	114.215	83.9851	78.5886	22.1727	22.9102	31.5454
ENSG00000100344	ENSG00000100344	patatin like phospholipase domain containing 3 [Source:HGNC Symbol;Acc:HGNC:18590]	PNPLA3	69.5691	188.96	-2.46771	1.39543e-10	58.7766	188.96	-2.84027	1.74931e-13	Y	Y	45.505	56.7797	74.045	59.8268	70.2919	78.5886	161.861	196.82	208.2
ENSG00000268119	ENSG00000268119	uncharacterized LOC105372321 [Source:NCBI gene;Acc:105372321]		6.96013	44.5651	-3.48297	1.78523e-10	137.694	44.5651	2.71556	1.67867e-09	Y		154.717	131.181	127.183	3.26328	6.39017	11.2269	42.1281	37.4895	54.0779
ENSG00000157150	ENSG00000157150	TIMP metallopeptidase inhibitor 4 [Source:HGNC Symbol;Acc:HGNC:11823]	TIMP4	23.6548	94.7076	-3.16177	1.78989e-10	30.3361	94.7076	-2.64268	6.40294e-08	Y	Y	43.2297	22.5161	25.2624	23.9307	27.3865	19.6471	95.3425	96.8478	91.9324
ENSG00000143375	ENSG00000143375	cingulin [Source:HGNC Symbol;Acc:HGNC:17429]	CGN	42.0371	171.362	-3.19917	2.18995e-10	28.5589	171.362	-4.29595	2.82396e-15	Y	Y	28.4406	37.2005	20.0357	25.0185	35.6024	65.4905	180.707	180.158	153.221
ENSG00000171174	ENSG00000171174	ribokinase [Source:HGNC Symbol;Acc:HGNC:30325]	RBKS	672.472	309.935	2.05962	2.1978e-10	745.612	309.935	2.27053	3.66759e-13	Y	Y	861.182	665.693	709.96	861.506	620.76	535.151	328.156	305.123	296.527
ENSG00000198155	ENSG00000198155	zinc finger protein 876, pseudogene [Source:HGNC Symbol;Acc:HGNC:32472]	ZNF876P	163.825	73.4826	2.09418	2.72196e-10	190.601	73.4826	2.41717	1.8263e-14	Y	Y	205.91	182.087	183.806	177.305	157.929	156.242	75.3871	66.648	78.4129
ENSG00000196074	ENSG00000196074	synaptonemal complex protein 2 [Source:HGNC Symbol;Acc:HGNC:11490]	SYCP2	62.3176	13.7522	3.2441	2.85389e-10	56.3142	13.7522	2.96573	6.40688e-09	Y	Y	51.1931	64.6114	53.1381	57.6513	67.5533	61.7482	15.5209	10.4137	15.3221
ENSG00000251011	ENSG00000251011	TMEM108 antisense RNA 1 [Source:HGNC Symbol;Acc:HGNC:50307]	TMEM108-AS1	7.52333	70.8673	-4.72265	2.92928e-10	1.95585	70.8673	-7.34514	2.61788e-12	Y	Y	2.27525	0.978961	2.61335	3.26328	13.6932	5.61347	66.518	54.1515	91.9324
ENSG00000188859	ENSG00000188859	family with sequence similarity 78 member B [Source:HGNC Symbol;Acc:HGNC:13495]	FAM78B	69.5334	12.4605	3.54762	3.16616e-10	45.6735	12.4605	2.50297	5.92929e-06	Y	Y	35.2664	53.8428	47.9114	52.2125	69.379	87.0088	7.76044	12.4965	17.1247
ENSG00000278266	ENSG00000278266	novel transcript		61.5496	0	6.8684	3.29925e-10	19.3902	0	2.986	1.01898e-06	Y	Y	23.8901	18.6003	15.6801	93.5473	61.1631	29.9385	0	0	0
ENSG00000269896	ENSG00000269896	small nuclear ribonucleoprotein polypeptide N pseudogene [Source:NCBI gene;Acc:100129534]		87.5869	26.7881	2.72915	3.57951e-10	102.249	26.7881	3.12992	6.9674e-13	Y	Y	119.451	94.9592	92.3384	87.0208	81.2465	94.4934	33.259	21.8689	25.2363
ENSG00000162777	ENSG00000162777	DENN domain containing 2D [Source:HGNC Symbol;Acc:HGNC:26192]	DENND2D	54.6065	10.6843	3.2678	3.78792e-10	128.442	10.6843	6.9407	1.03698e-23	Y	Y	121.726	123.349	140.25	50.0369	52.0343	61.7482	7.76044	19.7861	4.50649
ENSG00000173801	ENSG00000173801	junction plakoglobin [Source:HGNC Symbol;Acc:HGNC:6207]	JUP	110.316	30.6344	2.90234	4.2296e-10	88.782	30.6344	2.39187	4.86509e-07	Y	Y	111.487	85.1696	69.6894	129.443	98.5913	102.914	27.7158	41.655	22.5324
ENSG00000183044	ENSG00000183044	4-aminobutyrate aminotransferase [Source:HGNC Symbol;Acc:HGNC:23]	ABAT	29.276	124.236	-3.20761	4.51403e-10	52.8978	124.236	-2.04106	0.000209643	Y	Y	65.9822	58.7376	33.9736	43.5104	23.7349	20.5827	124.167	145.792	102.748
ENSG00000105894	ENSG00000105894	pleiotrophin [Source:HGNC Symbol;Acc:HGNC:9630]	PTN	41.5106	104.831	-2.26451	5.05506e-10	423.135	104.831	3.76543	7.58316e-34	Y		406.132	411.164	452.11	48.9492	45.6441	29.9385	115.298	107.262	91.9324
ENSG00000235142	ENSG00000235142	long intergenic non-protein coding RNA 2532 [Source:HGNC Symbol;Acc:HGNC:53549]	LINC02532	83.0308	22.4472	2.94956	5.48588e-10	60.1174	22.4472	2.21962	8.1449e-06	Y	Y	53.4683	76.3589	50.5248	83.7575	85.8109	79.5241	23.2813	26.0344	18.026
ENSG00000100292	ENSG00000100292	heme oxygenase 1 [Source:HGNC Symbol;Acc:HGNC:5013]	HMOX1	10063	2600.92	3.0116	5.8146e-10	7255.81	2600.92	2.29634	4.7126e-06	Y	Y	8775.63	6578.62	6413.16	13767.8	9556.96	6864.34	3028.79	2719.03	2054.96
ENSG00000144893	ENSG00000144893	mediator complex subunit 12 like [Source:HGNC Symbol;Acc:HGNC:16050]	MED12L	2.32007	45.4966	-5.5602	6.2261e-10	5.66809	45.4966	-4.11216	2.6971e-08	Y	Y	5.68812	7.83169	3.48447	3.26328	1.82576	1.87116	37.6935	51.0273	47.7688
ENSG00000198681	ENSG00000198681	MAGE family member A1 [Source:HGNC Symbol;Acc:HGNC:6796]	MAGEA1	0	51.4177	-8.04351	7.27124e-10	3.31402	51.4177	-5.55064	7.98607e-10	Y	Y	3.41287	3.91584	2.61335	0	0	0	34.3676	60.3997	59.4856
ENSG00000196263	ENSG00000196263	zinc finger protein 471 [Source:HGNC Symbol;Acc:HGNC:23226]	ZNF471	181.447	81.3483	2.08871	7.39142e-10	188.345	81.3483	2.16671	8.85898e-11	Y	Y	189.983	170.339	204.713	188.182	162.493	193.665	69.8439	82.2686	91.9324
ENSG00000133019	ENSG00000133019	cholinergic receptor muscarinic 3 [Source:HGNC Symbol;Acc:HGNC:1952]	CHRM3	85.6959	0.300433	10.5483	7.71391e-10	73.2597	0.300433	9.11042	2.78981e-09	Y	Y	84.1842	76.3589	59.236	69.6166	98.5913	88.8799	0	0	0.901298
ENSG00000182324	ENSG00000182324	potassium voltage-gated channel subfamily J member 14 [Source:HGNC Symbol;Acc:HGNC:6260]	KCNJ14	123.803	48.9828	2.30163	8.44031e-10	110.423	48.9828	2.0722	1.33553e-07	Y	Y	97.8357	126.286	107.147	122.917	127.803	120.69	47.6713	47.9032	51.374
ENSG00000133640	ENSG00000133640	leucine rich repeats and IQ motif containing 1 [Source:HGNC Symbol;Acc:HGNC:25708]	LRRIQ1	40.326	4.23062	3.82437	8.5895e-10	77.5503	4.23062	6.72372	1.79769e-16	Y	Y	79.6337	76.3589	76.6583	54.388	31.038	35.552	2.21727	4.1655	6.30908
ENSG00000169067	ENSG00000169067	actin, beta like 2 [Source:HGNC Symbol;Acc:HGNC:17780]	ACTBL2	104.994	248.43	-2.20188	1.01381e-09	110.04	248.43	-2.11576	7.45854e-09	Y	Y	101.249	116.496	112.374	79.4065	120.5	115.076	215.075	236.392	293.823
ENSG00000159217	ENSG00000159217	insulin like growth factor 2 mRNA binding protein 1 [Source:HGNC Symbol;Acc:HGNC:28866]	IGF2BP1	38.3662	4.8075	3.56656	1.11586e-09	123.879	4.8075	9.99205	7.31993e-24	Y	Y	150.166	112.58	108.89	46.7737	36.5153	31.8097	6.6518	4.1655	3.60519
ENSG00000165186	ENSG00000165186	patched domain containing 1 [Source:HGNC Symbol;Acc:HGNC:26392]	PTCHD1	275.279	116.389	2.1857	1.18241e-09	321.14	116.389	2.51967	3.29377e-13	Y	Y	294.645	329.91	338.865	216.464	288.471	320.903	94.2339	106.22	148.714
ENSG00000167994	ENSG00000167994	RAB3A interacting protein like 1 [Source:HGNC Symbol;Acc:HGNC:9780]	RAB3IL1	61.7393	159.513	-2.36016	1.36718e-09	51.4367	159.513	-2.78032	8.35835e-13	Y	Y	62.5693	49.927	41.8136	64.1778	61.1631	59.877	156.317	184.323	137.899
ENSG00000171298	ENSG00000171298	glucosidase alpha, acid [Source:HGNC Symbol;Acc:HGNC:4065]	GAA	449.4	182.836	2.25264	1.47462e-09	586.078	182.836	2.87551	1.22422e-15	Y	Y	674.611	553.113	530.51	608.058	409.884	330.259	186.25	207.233	155.023
ENSG00000127585	ENSG00000127585	F-box and leucine rich repeat protein 16 [Source:HGNC Symbol;Acc:HGNC:14150]	FBXL16	55.3978	5.52573	3.84545	1.80845e-09	50.9455	5.52573	3.61183	8.32794e-09	Y	Y	65.9822	37.2005	49.6537	85.933	45.6441	34.6164	2.21727	6.24825	8.11168
ENSG00000184500	ENSG00000184500	protein S [Source:HGNC Symbol;Acc:HGNC:9456]	PROS1	251.211	112.033	2.10302	1.96672e-09	399.2	112.033	3.24181	8.69437e-23	Y	Y	424.334	369.068	404.198	243.658	297.6	212.376	111.972	138.503	85.6233
ENSG00000169071	ENSG00000169071	receptor tyrosine kinase like orphan receptor 2 [Source:HGNC Symbol;Acc:HGNC:10257]	ROR2	56.0948	10.0813	3.34405	2.15181e-09	69.3249	10.0813	3.99927	8.07071e-12	Y	Y	85.3218	61.6745	60.9782	73.9677	44.7312	49.5856	6.6518	14.5792	9.01298
ENSG00000099338	ENSG00000099338	cation channel sperm associated auxiliary subunit gamma [Source:HGNC Symbol;Acc:HGNC:25243]	CATSPERG	50.4229	8.62188	3.46377	2.29162e-09	41.6519	8.62188	2.97204	1.55733e-07	Y	Y	32.9911	44.0532	47.9114	59.8268	47.4699	43.9722	7.76044	7.28962	10.8156
ENSG00000100433	ENSG00000100433	potassium two pore domain channel subfamily K member 10 [Source:HGNC Symbol;Acc:HGNC:6273]	KCNK10	44.1297	1.36423	5.36846	2.38577e-09	41.4653	1.36423	5.13464	4.68234e-09	Y	Y	37.5416	37.2005	49.6537	57.6513	41.9926	32.7452	1.10863	2.08275	0.901298
ENSG00000102048	ENSG00000102048	ankyrin repeat and SOCS box containing 9 [Source:HGNC Symbol;Acc:HGNC:17184]	ASB9	96.649	32.3415	2.55328	2.39662e-09	90.4452	32.3415	2.40552	2.92375e-08	Y	Y	78.4961	105.728	87.1117	89.1963	91.2882	109.463	26.6072	34.3654	36.0519
ENSG00000162894	ENSG00000162894	Fc fragment of IgM receptor [Source:HGNC Symbol;Acc:HGNC:14315]	FCMR	180.894	84.5558	2.02587	2.44289e-09	197.001	84.5558	2.19988	1.71481e-11	Y	Y	192.259	211.456	187.29	203.411	164.319	174.953	96.4511	83.3099	73.9064
ENSG00000167646	ENSG00000167646	dynein axonemal assembly factor 3 [Source:HGNC Symbol;Acc:HGNC:30492]	DNAAF3	116.713	30.2578	2.92837	2.65934e-09	132.238	30.2578	3.26089	5.16169e-11	Y	Y	166.093	108.665	121.956	165.339	93.114	91.6867	38.8022	31.2412	20.7298
ENSG00000271856	ENSG00000271856	long intergenic non-protein coding RNA 1215 [Source:HGNC Symbol;Acc:HGNC:49651]	LINC01215	57.7103	10.2868	3.26335	2.72888e-09	115.397	10.2868	5.85358	3.59219e-18	Y	Y	147.891	92.0223	106.276	82.6697	49.2956	41.1654	12.195	11.4551	7.21038
ENSG00000253802	ENSG00000253802	SIRT1 regulating lncRNA tumor promoter [Source:HGNC Symbol;Acc:HGNC:53902]	SIRLNT	9.5058	65.0902	-3.99671	2.93933e-09	5.41646	65.0902	-5.14484	1.17325e-11	Y	Y	5.68812	0.978961	9.58229	10.8776	5.47729	12.1625	68.7353	56.2342	70.3012
ENSG00000025039	ENSG00000025039	Ras related GTP binding D [Source:HGNC Symbol;Acc:HGNC:19903]	RRAGD	42.0834	5.36167	3.78854	2.96671e-09	32.5384	5.36167	3.04762	4.612e-07	Y	Y	37.5416	31.3267	28.7469	34.8083	47.4699	43.9722	6.6518	3.12412	6.30908
ENSG00000165181	ENSG00000165181	chromosome 9 open reading frame 84 [Source:HGNC Symbol;Acc:HGNC:26535]	C9orf84	18.6747	72.8905	-2.99971	5.20123e-09	31.0963	72.8905	-2.05154	0.0001442	Y	Y	32.9911	25.453	34.8447	16.3164	20.9963	18.7116	57.649	78.1031	82.9194
ENSG00000120875	ENSG00000120875	dual specificity phosphatase 4 [Source:HGNC Symbol;Acc:HGNC:3070]	DUSP4	174.858	60.6824	2.48873	6.19351e-09	158.936	60.6824	2.28604	1.81302e-07	Y	Y	186.57	159.571	130.668	234.956	167.057	122.561	58.7576	65.6066	57.683
ENSG00000224376	ENSG00000224376	novel transcript		67.2311	14.1236	3.20665	7.2241e-09	40.9215	14.1236	2.13264	0.000230364	Y	Y	50.0555	27.4109	45.2981	87.0208	53.86	60.8126	14.4122	13.5379	14.4208
ENSG00000230658	ENSG00000230658	KLHL7 divergent transcript [Source:HGNC Symbol;Acc:HGNC:43431]	KLHL7-DT	85.3994	28.156	2.57132	7.55228e-09	73.1955	28.156	2.23569	1.29191e-06	Y	Y	81.909	63.6325	74.045	89.1963	94.0268	72.9751	29.9331	30.1999	24.335
ENSG00000080224	ENSG00000080224	EPH receptor A6 [Source:HGNC Symbol;Acc:HGNC:19296]	EPHA6	59.3156	0.300433	7.57647	9.14031e-09	246.487	0.300433	28.6469	6.45387e-14	Y	Y	277.58	231.035	230.846	59.8268	65.7275	52.3924	0	0	0.901298
ENSG00000006047	ENSG00000006047	Y-box binding protein 2 [Source:HGNC Symbol;Acc:HGNC:17948]	YBX2	38.6092	0	5.26106	9.34247e-09	19.6256	0	3.22726	8.72461e-07	Y	Y	25.0277	14.6844	19.1646	56.5635	24.6478	34.6164	0	0	0
ENSG00000235706	ENSG00000235706	DICER1 antisense RNA 1 [Source:HGNC Symbol;Acc:HGNC:43017]	DICER1-AS1	33.4066	102.056	-2.61967	9.50307e-09	34.3335	102.056	-2.55842	2.32276e-08	Y	Y	38.6792	30.3478	33.9736	40.2471	33.7766	26.1962	116.407	104.137	85.6233
ENSG00000167524	ENSG00000167524	uncharacterized serine/threonine-protein kinase SgK494 [Source:NCBI gene;Acc:124923]		417.755	166.884	2.25958	1.02407e-08	446.765	166.884	2.39959	6.51568e-10	Y	Y	484.628	397.458	458.208	373.102	422.664	457.498	133.036	119.758	247.857
ENSG00000135114	ENSG00000135114	2'-5'-oligoadenylate synthetase like [Source:HGNC Symbol;Acc:HGNC:8090]	OASL	43.863	126.082	-2.50446	1.241e-08	39.8119	126.082	-2.71143	7.21808e-10	Y	Y	38.6792	37.2005	43.5559	38.0716	39.2539	54.2635	135.253	144.751	98.2414
ENSG00000269707	ENSG00000269707	novel transcript, sense overlapping POU3F3		47.5426	9.40766	3.17229	1.27588e-08	54.3535	9.40766	3.53996	5.23586e-10	Y	Y	51.1931	66.5693	45.2981	39.1593	52.9472	50.5212	9.9777	8.33099	9.91427
ENSG00000166920	ENSG00000166920	chromosome 15 open reading frame 48 [Source:HGNC Symbol;Acc:HGNC:29898]	C15orf48	11097	3591.97	2.59077	1.2893e-08	9958.23	3591.97	2.36188	3.50655e-07	Y	Y	11494.6	8876.24	9503.89	14751.1	10512.7	8027.26	4386.86	3435.49	2953.55
ENSG00000260912	ENSG00000260912	novel transcript, overlapping ACER2		117.251	46.2251	2.28747	1.30407e-08	109.914	46.2251	2.1507	1.87281e-07	Y	Y	125.139	101.812	102.792	120.741	115.936	115.076	59.8662	36.4481	42.361
ENSG00000222032	ENSG00000222032	novel protein (LOC728009)		37.2072	3.9993	3.90155	1.38704e-08	19.6346	3.9993	2.36833	0.000154955	Y	Y	18.202	21.5371	19.1646	41.3349	32.8638	37.4231	3.3259	4.1655	4.50649
ENSG00000104321	ENSG00000104321	transient receptor potential cation channel subfamily A member 1 [Source:HGNC Symbol;Acc:HGNC:497]	TRPA1	67.3278	23.0441	2.43032	1.38965e-08	160.358	23.0441	5.42644	4.59812e-29	Y	Y	161.543	156.634	162.899	65.2656	70.2919	66.426	24.3899	17.7034	27.0389
ENSG00000149131	ENSG00000149131	serpin family G member 1 [Source:HGNC Symbol;Acc:HGNC:1228]	SERPING1	8.22047	65.5229	-4.03733	1.45626e-08	3.97668	65.5229	-5.48619	2.61645e-11	Y	Y	9.10099	1.95792	0.871117	4.35104	10.9546	9.35578	46.5626	83.3099	66.696
ENSG00000102879	ENSG00000102879	coronin 1A [Source:HGNC Symbol;Acc:HGNC:2252]	CORO1A	22.5488	83.3354	-2.89726	1.5348e-08	25.4323	83.3354	-2.6502	2.22927e-07	Y	Y	22.7525	27.4109	26.1335	18.4919	17.3448	31.8097	90.908	90.5996	68.4986
ENSG00000115232	ENSG00000115232	integrin subunit alpha 4 [Source:HGNC Symbol;Acc:HGNC:6140]	ITGA4	27.0927	2.84397	3.04527	1.82375e-08	638.829	2.84397	56.2066	8.85858e-51	Y	Y	673.474	576.608	666.405	17.4042	27.3865	36.4875	0	3.12412	5.40779
ENSG00000158220	ENSG00000158220	extended synaptotagmin 3 [Source:HGNC Symbol;Acc:HGNC:24295]	ESYT3	9.0115	51.6963	-3.49919	2.26832e-08	12.5506	51.6963	-2.89704	1.85902e-06	Y	Y	12.5139	14.6844	10.4534	7.61432	9.12882	10.2914	39.9108	65.6066	49.5714
ENSG00000132563	ENSG00000132563	receptor accessory protein 2 [Source:HGNC Symbol;Acc:HGNC:17975]	REEP2	55.3447	0.669977	6.80849	2.29637e-08	71.1459	0.669977	8.45932	2.84734e-09	Y	Y	80.7713	65.5904	67.076	72.8799	53.86	39.2943	1.10863	0	0.901298
ENSG00000100302	ENSG00000100302	RASD family member 2 [Source:HGNC Symbol;Acc:HGNC:18229]	RASD2	305.341	1645.48	-3.28464	2.31553e-08	619.442	1645.48	-2.03891	0.00230729	Y	Y	873.695	461.091	523.541	429.665	306.728	179.631	1782.68	1964.03	1189.71
ENSG00000260658	ENSG00000260658	novel transcript		30.4272	0	4.85287	2.88303e-08	27.3204	0	4.46987	6.12533e-08	Y	Y	20.4772	36.2216	25.2624	29.3695	31.038	30.8741	0	0	0
ENSG00000132185	ENSG00000132185	Fc receptor like A [Source:HGNC Symbol;Acc:HGNC:18504]	FCRLA	36.1809	3.72128	3.67857	2.96645e-08	33.217	3.72128	3.44005	1.17481e-07	Y	Y	31.8535	38.1795	29.618	41.3349	43.8183	23.3895	4.43454	3.12412	3.60519
ENSG00000142677	ENSG00000142677	interleukin 22 receptor subunit alpha 1 [Source:HGNC Symbol;Acc:HGNC:13700]	IL22RA1	54.2137	10.3071	3.20704	3.22069e-08	39.443	10.3071	2.46456	1.93487e-05	Y	Y	53.4683	35.2426	29.618	62.0023	53.86	46.7789	12.195	5.20687	13.5195
ENSG00000253819	ENSG00000253819	long intergenic non-protein coding RNA 1151 [Source:HGNC Symbol;Acc:HGNC:49471]	LINC01151	10.0765	54.5782	-3.38886	3.82296e-08	12.1693	54.5782	-3.06248	4.34448e-07	Y	Y	13.6515	9.78961	13.0668	4.35104	12.7803	13.0981	57.649	58.317	47.7688
ENSG00000137809	ENSG00000137809	integrin subunit alpha 11 [Source:HGNC Symbol;Acc:HGNC:6136]	ITGA11	0.971175	43.8101	-6.39979	4.31451e-08	0.943013	43.8101	-6.37738	4.96636e-08	Y	Y	0	1.95792	0.871117	1.08776	1.82576	0	42.1281	54.1515	35.1506
ENSG00000182463	ENSG00000182463	teashirt zinc finger homeobox 2 [Source:HGNC Symbol;Acc:HGNC:13010]	TSHZ2	3.71212	37.7037	-3.94928	4.32495e-08	11.1326	37.7037	-2.38722	0.000488608	Y	Y	14.7891	10.7686	7.84005	6.52656	2.73865	1.87116	39.9108	41.655	31.5454
ENSG00000240225	ENSG00000240225	zinc finger protein 542, pseudogene [Source:HGNC Symbol;Acc:HGNC:25393]	ZNF542P	61.8297	7.99645	3.33436	4.39156e-08	62.9769	7.99645	3.37192	3.43945e-08	Y	Y	62.5693	55.8008	70.5605	31.545	54.7729	99.1713	5.54317	3.12412	15.3221
ENSG00000143416	ENSG00000143416	selenium binding protein 1 [Source:HGNC Symbol;Acc:HGNC:10719]	SELENBP1	30.7262	2.58838	3.67725	4.4223e-08	49.8048	2.58838	5.49939	1.57058e-11	Y	Y	52.3307	43.0743	54.0093	34.8083	25.5607	31.8097	2.21727	1.04137	4.50649
ENSG00000115339	ENSG00000115339	polypeptide N-acetylgalactosaminyltransferase 3 [Source:HGNC Symbol;Acc:HGNC:4125]	GALNT3	1134.95	525.691	2.02037	4.84993e-08	2250.1	525.691	3.79787	5.13247e-27	Y	Y	2622.22	1975.54	2152.53	1456.51	1147.49	800.855	618.618	532.142	426.314
ENSG00000167972	ENSG00000167972	ATP binding cassette subfamily A member 3 [Source:HGNC Symbol;Acc:HGNC:33]	ABCA3	494.233	211.289	2.13807	4.88358e-08	780.137	211.289	3.2418	3.50243e-18	Y	Y	913.512	703.873	723.027	693.991	450.964	337.744	198.445	221.813	213.608
ENSG00000188906	ENSG00000188906	leucine rich repeat kinase 2 [Source:HGNC Symbol;Acc:HGNC:18618]	LRRK2	33.5005	2.0342	4.3593	5.00335e-08	13.1652	2.0342	2.18228	0.000821887	Y	Y	14.7891	10.7686	13.9379	35.8961	35.6024	29.0029	2.21727	2.08275	1.8026
ENSG00000067715	ENSG00000067715	synaptotagmin 1 [Source:HGNC Symbol;Acc:HGNC:11509]	SYT1	40.8257	4.82992	3.23664	5.18266e-08	94.893	4.82992	6.28324	2.44241e-15	Y	Y	127.414	75.38	81.885	65.2656	31.9509	25.2606	7.76044	3.12412	3.60519
ENSG00000276570	ENSG00000276570	novel transcript		126.034	54.79	2.10096	5.6695e-08	135.608	54.79	2.24723	2.43352e-09	Y	Y	143.341	130.202	133.281	128.356	115.023	134.723	41.0195	59.3583	63.9921
ENSG00000166394	ENSG00000166394	cytochrome b5 reductase 2 [Source:HGNC Symbol;Acc:HGNC:24376]	CYB5R2	36.4746	1.33995	4.36777	5.74298e-08	34.2958	1.33995	4.14457	1.19623e-07	Y	Y	51.1931	26.4319	25.2624	45.6859	32.8638	30.8741	2.21727	0	1.8026
ENSG00000239697	ENSG00000239697	TNF superfamily member 12 [Source:HGNC Symbol;Acc:HGNC:11927]	TNFSF12	213.072	97.8207	2.03021	6.63255e-08	260.091	97.8207	2.44334	3.60706e-12	Y	Y	279.856	240.824	259.593	236.044	228.22	174.953	84.2562	128.089	81.1168
ENSG00000153822	ENSG00000153822	potassium voltage-gated channel subfamily J member 16 [Source:HGNC Symbol;Acc:HGNC:6262]	KCNJ16	300.194	128.821	2.12734	7.23519e-08	664.867	128.821	4.39224	3.39335e-28	Y	Y	515.344	823.306	655.951	208.85	324.986	366.747	138.579	120.799	127.083
ENSG00000100151	ENSG00000100151	protein interacting with PRKCA 1 [Source:HGNC Symbol;Acc:HGNC:9394]	PICK1	49.7583	9.38894	3.15891	7.82352e-08	35.915	9.38894	2.43891	3.17109e-05	Y	Y	37.5416	28.3899	41.8136	57.6513	40.1668	51.4568	4.43454	15.6206	8.11168
ENSG00000100024	ENSG00000100024	beta-ureidopropionase 1 [Source:HGNC Symbol;Acc:HGNC:16297]	UPB1	97.7322	24.6885	2.83983	7.88621e-08	86.5494	24.6885	2.57915	1.28268e-06	Y	Y	89.8723	86.1486	83.6272	156.637	76.6821	59.877	25.4986	26.0344	22.5324
ENSG00000145416	ENSG00000145416	membrane associated ring-CH-type finger 1 [Source:HGNC Symbol;Acc:HGNC:26077]	MARCH1	9.74957	50.9276	-3.28109	8.27373e-08	14.8566	50.9276	-2.52738	3.02658e-05	Y	Y	11.3762	16.6423	16.5512	10.8776	13.6932	4.67789	48.7799	56.2342	47.7688
ENSG00000005102	ENSG00000005102	mesenchyme homeobox 1 [Source:HGNC Symbol;Acc:HGNC:7013]	MEOX1	6.29332	42.0274	-3.5351	8.35791e-08	12.1043	42.0274	-2.45639	0.000144974	Y	Y	9.10099	9.78961	17.4223	8.70208	4.56441	5.61347	38.8022	45.8205	41.4597
ENSG00000163131	ENSG00000163131	cathepsin S [Source:HGNC Symbol;Acc:HGNC:2545]	CTSS	312.79	132.432	2.15214	8.60596e-08	300.101	132.432	2.07488	4.02762e-07	Y	Y	342.425	272.151	285.726	431.841	285.732	220.796	141.905	136.42	118.971
ENSG00000177212	ENSG00000177212	olfactory receptor family 2 subfamily T member 33 [Source:HGNC Symbol;Acc:HGNC:31255]	OR2T33	0.912882	42.6072	-5.69532	9.24429e-08	2.48371	42.6072	-4.78285	3.8641e-08	Y	Y	1.13762	1.95792	4.35559	0	2.73865	0	28.8245	45.8205	53.1766
ENSG00000229207	ENSG00000229207	serpin family H member 1 pseudogene 1 [Source:HGNC Symbol;Acc:HGNC:19917]	SERPINH1P1	14.8764	69.5884	-3.13496	9.80177e-08	18.9211	69.5884	-2.66923	5.47138e-06	Y	Y	9.10099	29.3688	18.2935	14.1409	15.519	14.9693	65.4094	87.4754	55.8805
ENSG00000278341	ENSG00000278341	novel transcript, antisense to CTU2		13.071	57.1252	-3.05429	9.96484e-08	17.3814	57.1252	-2.56132	7.26219e-06	Y	Y	20.4772	18.6003	13.0668	8.70208	14.6061	15.9048	49.8885	65.6066	55.8805
ENSG00000117477	ENSG00000117477	coiled-coil domain containing 181 [Source:HGNC Symbol;Acc:HGNC:28051]	CCDC181	35.9878	1.0171	4.91392	1.10688e-07	27.4272	1.0171	3.94752	1.33908e-06	Y	Y	35.2664	23.4951	23.5202	42.4226	35.6024	29.9385	1.10863	1.04137	0.901298
ENSG00000228262	ENSG00000228262	long intergenic non-protein coding RNA 1320 [Source:HGNC Symbol;Acc:HGNC:50526]	LINC01320	32.4353	2.9355	3.47548	1.26656e-07	42.0692	2.9355	4.24212	2.87313e-09	Y	Y	31.8535	49.927	44.427	19.5797	34.6895	43.0366	2.21727	2.08275	4.50649
ENSG00000177335	ENSG00000177335	chromosome 8 open reading frame 31 (putative) [Source:HGNC Symbol;Acc:HGNC:26731]	C8orf31	19.8715	77.6941	-2.95938	1.29838e-07	9.2196	77.6941	-4.7854	2.49766e-13	Y	Y	7.96337	12.7265	6.96894	15.2286	20.9963	23.3895	90.908	85.3927	56.7818
ENSG00000141524	ENSG00000141524	transmembrane channel like 6 [Source:HGNC Symbol;Acc:HGNC:18021]	TMC6	10.751	56.6747	-3.2475	1.32774e-07	15.9275	56.6747	-2.58407	2.46743e-05	Y	Y	22.7525	13.7055	11.3245	11.9654	11.8675	8.4202	76.4957	52.0687	41.4597
ENSG00000225756	ENSG00000225756	DBH antisense RNA 1 [Source:HGNC Symbol;Acc:HGNC:24155]	DBH-AS1	3.0528	39.6455	-4.09128	1.37135e-07	4.29784	39.6455	-3.60912	1.38585e-06	Y	Y	1.13762	3.91584	7.84005	5.4388	0.912882	2.80673	29.9331	38.5308	50.4727
ENSG00000237975	ENSG00000237975	FLG antisense RNA 1 [Source:HGNC Symbol;Acc:HGNC:27913]	FLG-AS1	134.13	56.4662	2.14575	1.44231e-07	175.801	56.4662	2.74372	1.07136e-12	Y	Y	170.644	170.339	186.419	104.425	132.368	165.597	59.8662	43.7377	65.7947
ENSG00000188153	ENSG00000188153	collagen type IV alpha 5 chain [Source:HGNC Symbol;Acc:HGNC:2207]	COL4A5	46.2747	0.69425	6.59234	1.50903e-07	11.7323	0.69425	2.32828	0.000971325	Y	Y	13.6515	13.7055	7.84005	44.5981	48.3827	45.8433	0	2.08275	0
ENSG00000205309	ENSG00000205309	5',3'-nucleotidase, mitochondrial [Source:HGNC Symbol;Acc:HGNC:15769]	NT5M	213.258	82.2943	2.28295	1.60084e-07	197.907	82.2943	2.13737	1.79362e-06	Y	Y	232.075	183.066	178.579	283.905	211.789	144.079	94.2339	89.5582	63.0908
ENSG00000276931	ENSG00000276931	novel transcript, sense intronic to LMF1		8.40291	45.9355	-3.30042	1.60523e-07	12.1644	45.9355	-2.69744	1.3066e-05	Y	Y	15.9267	12.7265	7.84005	7.61432	7.30306	10.2914	43.2367	53.1101	41.4597
ENSG00000101825	ENSG00000101825	matrix remodeling associated 5 [Source:HGNC Symbol;Acc:HGNC:7539]	MXRA5	88.485	26.7485	2.5007	1.69261e-07	381.03	26.7485	8.92865	1.00438e-36	Y	Y	493.729	359.279	290.082	126.18	80.3336	58.9414	21.064	31.2412	27.9402
ENSG00000198838	ENSG00000198838	ryanodine receptor 3 [Source:HGNC Symbol;Acc:HGNC:10485]	RYR3	42.6943	8.97085	2.9741	1.7829e-07	42.598	8.97085	2.95904	2.11355e-07	Y	Y	43.2297	40.1374	44.427	33.7205	42.9055	51.4568	5.54317	11.4551	9.91427
ENSG00000120051	ENSG00000120051	cilia and flagella associated protein 58 [Source:HGNC Symbol;Acc:HGNC:26676]	CFAP58	69.8	154.89	-2.06448	1.79844e-07	57.2369	154.89	-2.45145	1.2843e-10	Y	Y	56.8812	46.0112	68.8183	65.2656	73.0306	71.1039	166.295	134.337	164.036
ENSG00000183242	ENSG00000183242	WT1 antisense RNA [Source:HGNC Symbol;Acc:HGNC:18135]	WT1-AS	121.191	53.2134	2.08103	1.8327e-07	118.899	53.2134	2.05508	3.28473e-07	Y	Y	96.6981	130.202	129.796	130.531	109.546	123.496	49.8885	52.0687	57.683
ENSG00000184986	ENSG00000184986	transmembrane protein 121 [Source:HGNC Symbol;Acc:HGNC:20511]	TMEM121	59.2188	142.958	-2.19744	1.86836e-07	62.9913	142.958	-2.08397	1.31197e-06	Y	Y	73.9456	63.6325	51.3959	75.0554	50.2085	52.3924	144.122	160.372	124.379
ENSG00000172318	ENSG00000172318	beta-1,3-galactosyltransferase 1 [Source:HGNC Symbol;Acc:HGNC:916]	B3GALT1	64.9494	19.9519	2.56851	1.87218e-07	75.243	19.9519	2.92513	2.46524e-09	Y	Y	58.0188	83.2117	84.4984	54.388	70.2919	70.1684	17.7381	24.993	17.1247
ENSG00000130775	ENSG00000130775	thymocyte selection associated family member 2 [Source:HGNC Symbol;Acc:HGNC:16839]	THEMIS2	44.3758	3.85951	2.63048	1.90455e-07	389.472	3.85951	12.2051	2.63653e-25	Y	Y	445.949	319.141	403.327	69.6166	41.9926	21.5183	6.6518	3.12412	1.8026
ENSG00000116299	ENSG00000116299	KIAA1324 [Source:HGNC Symbol;Acc:HGNC:29618]	KIAA1324	36.1119	98.5198	-2.39606	1.92749e-07	27.0521	98.5198	-3.0308	6.82406e-11	Y	Y	29.5782	33.2847	18.2935	38.0716	33.7766	36.4875	95.3425	94.7651	105.452
ENSG00000160190	ENSG00000160190	solute carrier family 37 member 1 [Source:HGNC Symbol;Acc:HGNC:11024]	SLC37A1	138.872	346.611	-2.24841	1.98324e-07	73.1611	346.611	-3.90487	9.28328e-19	Y	Y	114.9	55.8008	48.7826	152.286	130.542	133.788	315.961	403.012	320.862
ENSG00000176092	ENSG00000176092	crystallin beta-gamma domain containing 2 [Source:HGNC Symbol;Acc:HGNC:17295]	CRYBG2	12.0363	58.2565	-3.20116	2.10257e-07	10.444	58.2565	-3.46565	3.45478e-08	Y	Y	14.7891	7.83169	8.71117	18.4919	6.39017	11.2269	57.649	66.648	50.4727
ENSG00000169174	ENSG00000169174	proprotein convertase subtilisin/kexin type 9 [Source:HGNC Symbol;Acc:HGNC:20001]	PCSK9	3.26321	38.9102	-3.93673	2.26079e-07	4.76588	38.9102	-3.45103	2.65918e-06	Y	Y	3.41287	3.91584	6.96894	3.26328	0.912882	5.61347	23.2813	44.7791	48.6701
ENSG00000136274	ENSG00000136274	NAC alpha domain containing [Source:HGNC Symbol;Acc:HGNC:22196]	NACAD	1.2906	33.217	-5.07493	2.51953e-07	0.995901	33.217	-5.25518	5.93733e-07	Y	Y	1.13762	0.978961	0.871117	1.08776	0.912882	1.87116	33.259	31.2412	35.1506
ENSG00000265763	ENSG00000265763	zinc finger protein 488 [Source:HGNC Symbol;Acc:HGNC:23535]	ZNF488	96.2312	41.445	2.09783	2.73361e-07	138.976	41.445	2.94087	9.8461e-15	Y	Y	133.102	148.802	135.023	82.6697	104.981	101.042	41.0195	36.4481	46.8675
ENSG00000164683	ENSG00000164683	hes related family bHLH transcription factor with YRPW motif 1 [Source:HGNC Symbol;Acc:HGNC:4880]	HEY1	180.829	83.4179	2.01046	3.42507e-07	235.028	83.4179	2.56474	1.68673e-12	Y	Y	252.553	217.329	235.202	221.903	163.406	157.177	107.537	76.0203	66.696
ENSG00000185247	ENSG00000185247	MAGE family member A11 [Source:HGNC Symbol;Acc:HGNC:6798]	MAGEA11	0	25.0095	-4.54339	3.5658e-07	0.943013	25.0095	-3.98753	1.8303e-05	Y	Y	0	1.95792	0.871117	0	0	0	28.8245	21.8689	24.335
ENSG00000114698	ENSG00000114698	phospholipid scramblase 4 [Source:HGNC Symbol;Acc:HGNC:16497]	PLSCR4	2.56607	24.5695	-3.02469	4.28518e-07	139.801	24.5695	4.46638	1.89685e-15	Y		154.717	125.307	139.379	2.17552	3.65153	1.87116	35.4763	22.9102	15.3221
ENSG00000140873	ENSG00000140873	ADAM metallopeptidase with thrombospondin type 1 motif 18 [Source:HGNC Symbol;Acc:HGNC:17110]	ADAMTS18	95.0904	16.8244	3.03414	4.49508e-07	63.9533	16.8244	2.27617	0.000186921	Y	Y	100.111	42.0953	49.6537	154.462	82.1594	48.6501	25.4986	11.4551	13.5195
ENSG00000181754	ENSG00000181754	adhesion molecule with Ig like domain 1 [Source:HGNC Symbol;Acc:HGNC:20824]	AMIGO1	1.89162	36.9752	-3.94505	4.53767e-07	5.82676	36.9752	-2.9185	7.78484e-05	Y	Y	9.10099	4.8948	3.48447	1.08776	3.65153	0.935578	17.7381	56.2342	36.9532
ENSG00000185046	ENSG00000185046	ankyrin repeat and sterile alpha motif domain containing 1B [Source:HGNC Symbol;Acc:HGNC:24600]	ANKS1B	90.1305	35.899	2.19914	5.07791e-07	123.216	35.899	2.9204	2.47727e-12	Y	Y	144.478	114.538	110.632	108.776	84.898	76.7174	38.8022	36.4481	32.4467
ENSG00000106258	ENSG00000106258	cytochrome P450 family 3 subfamily A member 5 [Source:HGNC Symbol;Acc:HGNC:2638]	CYP3A5	33.5307	4.74209	3.11038	6.46735e-07	36.4688	4.74209	3.32463	1.74967e-07	Y	Y	30.7159	34.2636	44.427	29.3695	32.8638	38.3587	1.10863	10.4137	2.70389
ENSG00000170579	ENSG00000170579	DLG associated protein 1 [Source:HGNC Symbol;Acc:HGNC:2905]	DLGAP1	36.8629	6.33393	3.05188	7.00065e-07	29.781	6.33393	2.59479	1.99839e-05	Y	Y	27.303	25.453	36.5869	42.4226	42.9055	25.2606	5.54317	6.24825	7.21038
ENSG00000169252	ENSG00000169252	adrenoceptor beta 2 [Source:HGNC Symbol;Acc:HGNC:286]	ADRB2	28.5484	84.9813	-2.46192	7.76075e-07	32.1803	84.9813	-2.25984	8.58148e-06	Y	Y	32.9911	39.1584	24.3913	22.843	32.8638	29.9385	86.4734	99.9719	68.4986
ENSG00000147408	ENSG00000147408	chondroitin sulfate N-acetylgalactosaminyltransferase 1 [Source:HGNC Symbol;Acc:HGNC:24290]	CSGALNACT1	52.4539	14.2861	2.60377	9.12734e-07	79.8936	14.2861	3.72168	1.26469e-11	Y	Y	101.249	70.4852	67.9471	69.6166	45.6441	42.101	15.5209	15.6206	11.7169
ENSG00000227234	ENSG00000227234	SPANX family member B1 [Source:HGNC Symbol;Acc:HGNC:14329]	SPANXB1	32.3112	7.5378	2.64121	9.30806e-07	103.71	7.5378	7.31952	7.7864e-22	Y	Y	112.625	101.812	96.694	30.4573	35.6024	30.8741	6.6518	11.4551	4.50649
ENSG00000206077	ENSG00000206077	zinc finger DHHC-type containing 11B [Source:HGNC Symbol;Acc:HGNC:32962]	ZDHHC11B	28.6295	1.29511	4.01016	9.31089e-07	12.3878	1.29511	2.23101	0.000826892	Y	Y	13.6515	7.83169	15.6801	30.4573	28.2993	27.1318	0	2.08275	1.8026
ENSG00000148219	ENSG00000148219	astrotactin 2 [Source:HGNC Symbol;Acc:HGNC:17021]	ASTN2	31.624	5.03882	2.99381	9.47025e-07	40.7169	5.03882	3.68544	1.08777e-08	Y	Y	40.9545	33.2847	47.9114	41.3349	29.2122	24.325	5.54317	4.1655	5.40779
ENSG00000248866	ENSG00000248866	USP46 antisense RNA 1 [Source:HGNC Symbol;Acc:HGNC:43991]	USP46-AS1	32.5519	84.3015	-2.26625	9.54456e-07	36.6126	84.3015	-2.05313	1.80601e-05	Y	Y	30.7159	38.1795	40.9425	28.2817	31.9509	37.4231	89.7993	80.1858	82.9194
ENSG00000154027	ENSG00000154027	adenylate kinase 5 [Source:HGNC Symbol;Acc:HGNC:365]	AK5	2029.05	722.68	2.35242	9.69942e-07	2273.23	722.68	2.5892	4.18789e-08	Y	Y	2531.21	2158.61	2129.88	2725.93	1931.66	1429.56	904.645	701.886	561.508
ENSG00000167619	ENSG00000167619	transmembrane protein 145 [Source:HGNC Symbol;Acc:HGNC:26912]	TMEM145	92.42	37.5855	2.15829	1.02573e-06	112.269	37.5855	2.58112	8.78359e-10	Y	Y	94.4228	104.749	137.637	85.933	94.0268	97.3001	34.3676	33.324	45.0649
ENSG00000006788	ENSG00000006788	myosin heavy chain 13 [Source:HGNC Symbol;Acc:HGNC:7571]	MYH13	28.7309	0.994682	4.1642	1.13871e-06	20.6854	0.994682	3.25512	1.61434e-05	Y	Y	18.202	26.4319	17.4223	32.6328	28.2993	25.2606	0	2.08275	0.901298
ENSG00000158473	ENSG00000158473	CD1d molecule [Source:HGNC Symbol;Acc:HGNC:1637]	CD1D	15.1882	59.4567	-2.84655	1.19026e-06	10.5498	59.4567	-3.6031	3.954e-09	Y	Y	17.0644	5.87376	8.71117	14.1409	15.519	15.9048	63.1921	65.6066	49.5714
ENSG00000184979	ENSG00000184979	ubiquitin specific peptidase 18 [Source:HGNC Symbol;Acc:HGNC:12616]	USP18	79.9524	30.3938	2.25895	1.27999e-06	81.472	30.3938	2.29971	7.52513e-07	Y	Y	89.8723	74.401	80.1428	95.7228	73.0306	71.1039	39.9108	26.0344	25.2363
ENSG00000153012	ENSG00000153012	leucine rich repeat LGI family member 2 [Source:HGNC Symbol;Acc:HGNC:18710]	LGI2	31.3478	2.0342	3.43086	1.4606e-06	15.1521	2.0342	2.1278	0.00091396	Y	Y	19.3396	15.6634	10.4534	48.9492	30.1251	14.9693	2.21727	2.08275	1.8026
ENSG00000148948	ENSG00000148948	leucine rich repeat containing 4C [Source:HGNC Symbol;Acc:HGNC:29317]	LRRC4C	6.88144	43.8736	-3.38892	1.47639e-06	3.09348	43.8736	-4.57292	8.00791e-09	Y	Y	5.68812	0.978961	2.61335	7.61432	2.73865	10.2914	49.8885	44.7791	36.9532
ENSG00000164929	ENSG00000164929	BAALC, MAP3K1 and KLF4 binding [Source:HGNC Symbol;Acc:HGNC:14333]	BAALC	22.6329	65.5058	-2.32181	1.56224e-06	155.274	65.5058	2.15209	3.29348e-06	Y		176.332	144.886	144.605	28.2817	24.6478	14.9693	85.3648	62.4825	48.6701
ENSG00000078900	ENSG00000078900	tumor protein p73 [Source:HGNC Symbol;Acc:HGNC:12003]	TP73	30.6226	0.369545	4.55743	1.90388e-06	30.0326	0.369545	4.51019	2.16966e-06	Y	Y	27.303	32.3057	30.4891	40.2471	31.038	20.5827	1.10863	0	0
ENSG00000142303	ENSG00000142303	ADAM metallopeptidase with thrombospondin type 1 motif 10 [Source:HGNC Symbol;Acc:HGNC:13201]	ADAMTS10	104.599	233.47	-2.06254	1.98333e-06	14.9506	233.47	-9.54278	2.46662e-38	Y	Y	20.4772	15.6634	8.71117	95.7228	109.546	108.527	245.008	283.254	172.148
ENSG00000250337	ENSG00000250337	p53 upregulated regulator of p53 levels [Source:HGNC Symbol;Acc:HGNC:48995]	PURPL	3.0528	34.2522	-3.70985	2.09062e-06	1.61259	34.2522	-4.22467	6.17995e-07	Y	Y	1.13762	1.95792	1.74223	5.4388	0.912882	2.80673	33.259	20.8275	48.6701
ENSG00000213318	ENSG00000213318	ribosomal protein S4, Y-linked 2 (RPS4Y2) pseudogene		19.6535	76.498	-2.89246	2.15158e-06	1.45186	76.498	-8.11914	5.12449e-13	Y	Y	0	0	4.35559	17.4042	21.9092	19.6471	84.2562	94.7651	50.4727
ENSG00000165511	ENSG00000165511	chromosome 10 open reading frame 25 [Source:HGNC Symbol;Acc:HGNC:23509]	C10orf25	16.8339	0	3.23138	2.27791e-06	16.3855	0	3.15224	2.94324e-06	Y	Y	19.3396	17.6213	12.1956	16.3164	17.3448	16.8404	0	0	0
ENSG00000180089	ENSG00000180089	transmembrane protein 86B [Source:HGNC Symbol;Acc:HGNC:28448]	TMEM86B	132.85	57.6642	2.06606	2.41265e-06	131.526	57.6642	2.05445	3.14039e-06	Y	Y	106.937	143.907	143.734	141.409	118.675	138.466	64.3008	37.4895	71.2025
ENSG00000253671	ENSG00000253671	novel transcript		8.33705	41.3559	-3.01477	3.49358e-06	7.51124	41.3559	-3.22144	9.60332e-07	Y	Y	10.2386	8.81065	3.48447	6.52656	9.12882	9.35578	43.2367	44.7791	36.0519
ENSG00000165092	ENSG00000165092	aldehyde dehydrogenase 1 family member A1 [Source:HGNC Symbol;Acc:HGNC:402]	ALDH1A1	1659.24	624.16	2.29474	3.75378e-06	140.489	624.16	-3.33721	1.47829e-12	Y		162.68	142.928	115.859	1092.11	1875.06	2010.56	712.852	667.521	492.109
ENSG00000227038	ENSG00000227038	general transcription factor IIi pseudogene 7 [Source:HGNC Symbol;Acc:HGNC:51720]	GTF2IP7	33.0212	7.09729	2.77069	3.93849e-06	29.8839	7.09729	2.54706	2.30686e-05	Y	Y	29.5782	31.3267	28.7469	26.1062	38.341	34.6164	6.6518	8.33099	6.30908
ENSG00000236017	ENSG00000236017	ASMTL antisense RNA 1 [Source:HGNC Symbol;Acc:HGNC:25811]	ASMTL-AS1	59.3071	163.862	-2.34105	4.38449e-06	35.8473	163.862	-3.44362	1.42888e-11	Y	Y	32.9911	36.2216	38.3292	56.5635	48.3827	72.9751	118.624	126.006	246.956
ENSG00000172031	ENSG00000172031	epoxide hydrolase 4 [Source:HGNC Symbol;Acc:HGNC:23758]	EPHX4	27.0345	0.669977	4.19609	4.61729e-06	50.6251	0.669977	7.06188	4.8765e-08	Y	Y	48.9178	48.948	54.0093	22.843	27.3865	30.8741	1.10863	0	0.901298
ENSG00000139679	ENSG00000139679	lysophosphatidic acid receptor 6 [Source:HGNC Symbol;Acc:HGNC:15520]	LPAR6	23.9591	1.43334	3.45614	4.73583e-06	16.3326	1.43334	2.62079	0.000123978	Y	Y	18.202	18.6003	12.1956	23.9307	28.2993	19.6471	2.21727	2.08275	0
ENSG00000100739	ENSG00000100739	bradykinin receptor B1 [Source:HGNC Symbol;Acc:HGNC:1029]	BDKRB1	16.6385	61.0824	-2.65271	6.1283e-06	15.4114	61.0824	-2.79643	1.95056e-06	Y	Y	17.0644	11.7475	17.4223	11.9654	16.4319	21.5183	58.7576	81.2272	43.2623
ENSG00000196277	ENSG00000196277	glutamate metabotropic receptor 7 [Source:HGNC Symbol;Acc:HGNC:4599]	GRM7	13.6516	0	2.84335	7.03782e-06	21.3719	0	3.88639	4.81632e-07	Y	Y	20.4772	24.474	19.1646	14.1409	12.7803	14.0337	0	0	0
ENSG00000237517	ENSG00000237517	DiGeorge syndrome critical region gene 5 [Source:HGNC Symbol;Acc:HGNC:16757]	DGCR5	14.4987	0	2.6921	7.27549e-06	24.7586	0	3.85257	2.92698e-07	Y	Y	26.1654	17.6213	30.4891	19.5797	16.4319	7.48463	0	0	0
ENSG00000113532	ENSG00000113532	ST8 alpha-N-acetyl-neuraminide alpha-2,8-sialyltransferase 4 [Source:HGNC Symbol;Acc:HGNC:10871]	ST8SIA4	23.6624	0.994682	3.46495	7.37831e-06	24.7897	0.994682	3.58787	5.29126e-06	Y	Y	28.4406	21.5371	24.3913	30.4573	25.5607	14.9693	0	2.08275	0.901298
ENSG00000198930	ENSG00000198930	chondrosarcoma associated gene 1 [Source:HGNC Symbol;Acc:HGNC:24294]	CSAG1	34.9454	92.771	-2.32634	7.59806e-06	1.66548	92.771	-10.4185	1.21509e-15	Y	Y	2.27525	0.978961	1.74223	32.6328	31.038	41.1654	95.3425	107.262	75.709
ENSG00000254887	ENSG00000254887	uncharacterized LOC100505622 [Source:NCBI gene;Acc:100505622]		24.6993	3.07373	3.02465	7.7682e-06	16.556	3.07373	2.26738	0.00056081	Y	Y	15.9267	13.7055	20.0357	19.5797	27.3865	27.1318	4.43454	2.08275	2.70389
ENSG00000175785	ENSG00000175785	proline rich membrane anchor 1 [Source:HGNC Symbol;Acc:HGNC:18319]	PRIMA1	25.2596	1.45576	3.12305	9.68078e-06	18.1139	1.45576	2.50392	0.000136536	Y	Y	28.4406	13.7055	12.1956	36.9838	20.0834	18.7116	3.3259	1.04137	0
ENSG00000113721	ENSG00000113721	platelet derived growth factor receptor beta [Source:HGNC Symbol;Acc:HGNC:8804]	PDGFRB	29.3599	79.6872	-2.27274	1.0499e-05	29.9776	79.6872	-2.23479	1.71642e-05	Y	Y	28.4406	28.3899	33.1025	27.194	34.6895	26.1962	86.4734	95.8064	56.7818
ENSG00000165215	ENSG00000165215	claudin 3 [Source:HGNC Symbol;Acc:HGNC:2045]	CLDN3	49.6061	16.1802	2.36625	1.24293e-05	41.4514	16.1802	2.03612	0.000408513	Y	Y	46.6426	33.2847	44.427	54.388	40.1668	54.2635	17.7381	14.5792	16.2234
ENSG00000162390	ENSG00000162390	acyl-CoA thioesterase 11 [Source:HGNC Symbol;Acc:HGNC:18156]	ACOT11	20.4899	64.7225	-2.49944	1.24505e-05	9.76925	64.7225	-3.93898	1.44615e-10	Y	Y	5.68812	8.81065	14.809	20.6674	14.6061	26.1962	65.4094	59.3583	69.3999
ENSG00000166670	ENSG00000166670	matrix metallopeptidase 10 [Source:HGNC Symbol;Acc:HGNC:7156]	MMP10	29.5296	3.88563	2.84167	1.30798e-05	20.6115	3.88563	2.23508	0.000531442	Y	Y	20.4772	19.5792	21.7779	42.4226	24.6478	21.5183	3.3259	8.33099	0
ENSG00000132016	ENSG00000132016	chromosome 19 open reading frame 57 [Source:HGNC Symbol;Acc:HGNC:28153]	C19orf57	16.0149	52.3308	-2.50287	1.57155e-05	13.8227	52.3308	-2.72893	2.48933e-06	Y	Y	12.5139	9.78961	19.1646	18.4919	15.519	14.0337	55.4317	44.7791	56.7818
ENSG00000108684	ENSG00000108684	acid sensing ion channel subunit 2 [Source:HGNC Symbol;Acc:HGNC:99]	ASIC2	36.3429	10.8874	2.30549	1.84826e-05	99.3679	10.8874	5.53393	2.33662e-18	Y	Y	83.0466	101.812	113.245	43.5104	36.5153	29.0029	8.86907	9.37237	14.4208
ENSG00000171811	ENSG00000171811	cilia and flagella associated protein 46 [Source:HGNC Symbol;Acc:HGNC:25247]	CFAP46	22.1763	2.17243	2.83968	1.92413e-05	23.3257	2.17243	2.92261	1.32589e-05	Y	Y	25.0277	20.5582	24.3913	11.9654	25.5607	29.0029	4.43454	2.08275	0
ENSG00000236871	ENSG00000236871	long intergenic non-protein coding RNA 106 [Source:HGNC Symbol;Acc:HGNC:31843]	LINC00106	25.8983	82.935	-2.47439	1.96891e-05	16.6638	82.935	-3.31329	1.24809e-08	Y	Y	15.9267	16.6423	17.4223	23.9307	20.0834	33.6808	62.0835	61.4411	125.28
ENSG00000284052	ENSG00000284052	novel transcript		14.2451	48.0591	-2.51815	2.19624e-05	12.1503	48.0591	-2.78619	2.6601e-06	Y	Y	14.7891	6.85273	14.809	14.1409	16.4319	12.1625	46.5626	48.9446	48.6701
ENSG00000231648	ENSG00000231648	long intergenic non-protein coding RNA 1698 [Source:HGNC Symbol;Acc:HGNC:52486]	LINC01698	44.4156	11.7439	2.50148	2.19802e-05	36.2078	11.7439	2.11858	0.000602831	Y	Y	45.505	35.2426	27.8757	42.4226	34.6895	56.1347	6.6518	11.4551	17.1247
ENSG00000162755	ENSG00000162755	kelch domain containing 9 [Source:HGNC Symbol;Acc:HGNC:28489]	KLHDC9	72.5889	26.8385	2.20032	2.52499e-05	77.8704	26.8385	2.34504	4.85817e-06	Y	Y	86.4594	62.6535	84.4984	102.249	57.5116	58.0058	28.8245	29.1585	22.5324
ENSG00000144452	ENSG00000144452	ATP binding cassette subfamily A member 12 [Source:HGNC Symbol;Acc:HGNC:14637]	ABCA12	168.902	64.3586	2.17076	3.1386e-05	186.172	64.3586	2.35204	3.76627e-06	Y	Y	128.552	241.803	188.161	88.1085	209.963	208.634	57.649	68.7307	66.696
ENSG00000047936	ENSG00000047936	ROS proto-oncogene 1, receptor tyrosine kinase [Source:HGNC Symbol;Acc:HGNC:10261]	ROS1	5.72026	31.0928	-2.82054	3.97284e-05	6.7048	31.0928	-2.62103	0.000156868	Y	Y	4.5505	6.85273	8.71117	3.26328	5.47729	8.4202	23.2813	31.2412	38.7558
ENSG00000268621	ENSG00000268621	IGFL2 antisense RNA 1 [Source:HGNC Symbol;Acc:HGNC:52559]	IGFL2-AS1	2.52291	29.816	-3.13586	4.05813e-05	1.25033	29.816	-3.52718	1.0473e-05	Y	Y	1.13762	0	2.61335	1.08776	2.73865	3.74231	47.6713	29.1585	12.6182
ENSG00000109667	ENSG00000109667	solute carrier family 2 member 9 [Source:HGNC Symbol;Acc:HGNC:13446]	SLC2A9	11.4685	44.9859	-2.58852	4.08816e-05	12.0255	44.9859	-2.52361	7.15339e-05	Y	Y	13.6515	5.87376	16.5512	7.61432	13.6932	13.0981	48.7799	51.0273	35.1506
ENSG00000261298	ENSG00000261298	novel transcript		25.2496	4.96971	2.57629	4.41257e-05	26.5769	4.96971	2.67502	2.37144e-05	Y	Y	21.6149	29.3688	28.7469	18.4919	30.1251	27.1318	4.43454	4.1655	6.30908
ENSG00000251127	ENSG00000251127	novel transcript		52.9155	21.4264	2.08851	4.71973e-05	60.5242	21.4264	2.34759	1.84445e-06	Y	Y	63.707	57.7587	60.1071	54.388	54.7729	49.5856	26.6072	18.7447	18.9273
ENSG00000167244	ENSG00000167244	insulin like growth factor 2 [Source:HGNC Symbol;Acc:HGNC:5466]	IGF2	21.4256	0.647557	3.21628	4.79309e-05	28.1715	0.647557	3.91009	9.23804e-06	Y	Y	36.404	17.6213	30.4891	27.194	13.6932	23.3895	0	1.04137	0.901298
ENSG00000151651	ENSG00000151651	ADAM metallopeptidase domain 8 [Source:HGNC Symbol;Acc:HGNC:215]	ADAM8	33.0031	9.29371	2.37538	5.11519e-05	37.6016	9.29371	2.64982	5.08234e-06	Y	Y	36.404	37.2005	39.2003	36.9838	26.4736	35.552	6.6518	10.4137	10.8156
ENSG00000258955	ENSG00000258955	long intergenic non-protein coding RNA 519 [Source:HGNC Symbol;Acc:HGNC:19838]	LINC00519	17.2903	51.6409	-2.34479	5.69456e-05	14.1013	51.6409	-2.70132	2.6856e-06	Y	Y	19.3396	10.7686	12.1956	19.5797	18.2576	14.0337	57.649	53.1101	44.1636
ENSG00000188921	ENSG00000188921	3-hydroxyacyl-CoA dehydratase 4 [Source:HGNC Symbol;Acc:HGNC:20920]	HACD4	10.8623	0	2.16258	5.79384e-05	23.1432	0	3.41046	8.76381e-07	Y	Y	25.0277	23.4951	20.9068	19.5797	3.65153	9.35578	0	0	0
ENSG00000129226	ENSG00000129226	CD68 molecule [Source:HGNC Symbol;Acc:HGNC:1693]	CD68	34.3982	8.73739	2.41452	5.98463e-05	39.9146	8.73739	2.72428	5.3265e-06	Y	Y	30.7159	41.1164	47.9114	35.8961	40.1668	27.1318	5.54317	6.24825	14.4208
ENSG00000110492	ENSG00000110492	midkine [Source:HGNC Symbol;Acc:HGNC:6972]	MDK	34.776	11.8341	2.12986	6.26451e-05	173.172	11.8341	8.67523	1.52268e-29	Y	Y	192.259	163.486	163.77	43.5104	37.4282	23.3895	17.7381	11.4551	6.30908
ENSG00000070190	ENSG00000070190	dual adaptor of phosphotyrosine and 3-phosphoinositides 1 [Source:HGNC Symbol;Acc:HGNC:16500]	DAPP1	10.3756	0	2.15006	6.40512e-05	24.8647	0	3.64993	4.94196e-07	Y	Y	38.6792	17.6213	18.2935	16.3164	6.39017	8.4202	0	0	0
ENSG00000164120	ENSG00000164120	15-hydroxyprostaglandin dehydrogenase [Source:HGNC Symbol;Acc:HGNC:5154]	HPGD	34.1665	9.33855	2.28759	7.75193e-05	81.6373	9.33855	4.63993	6.12083e-13	Y	Y	78.4961	71.4641	94.9518	40.2471	17.3448	44.9078	8.86907	8.33099	10.8156
ENSG00000206561	ENSG00000206561	collagen like tail subunit of asymmetric acetylcholinesterase [Source:HGNC Symbol;Acc:HGNC:2226]	COLQ	10.723	36.5017	-2.42368	8.45993e-05	13.4027	36.5017	-2.104	0.00117002	Y	Y	13.6515	11.7475	14.809	10.8776	9.12882	12.1625	36.5849	39.5722	33.348
ENSG00000153162	ENSG00000153162	bone morphogenetic protein 6 [Source:HGNC Symbol;Acc:HGNC:1073]	BMP6	20.792	2.68176	2.60358	8.72172e-05	18.8433	2.68176	2.42862	0.000236837	Y	Y	26.1654	14.6844	15.6801	28.2817	20.9963	13.0981	2.21727	3.12412	2.70389
ENSG00000186364	ENSG00000186364	nudix hydrolase 17 [Source:HGNC Symbol;Acc:HGNC:26618]	NUDT17	45.5042	17.1768	2.13098	9.69164e-05	49.6143	17.1768	2.29342	1.70823e-05	Y	Y	44.3673	54.8218	49.6537	42.4226	53.86	40.2299	15.5209	19.7861	16.2234
ENSG00000221866	ENSG00000221866	plexin A4 [Source:HGNC Symbol;Acc:HGNC:9102]	PLXNA4	20.2416	3.55879	2.36171	9.72837e-05	60.8465	3.55879	5.54066	3.74153e-12	Y	Y	40.9545	75.38	66.2049	16.3164	20.0834	24.325	3.3259	1.04137	6.30908
ENSG00000232415	ENSG00000232415	ELN antisense RNA 1 [Source:HGNC Symbol;Acc:HGNC:40212]	ELN-AS1	27.8991	6.51885	2.4236	9.92486e-05	30.1024	6.51885	2.58439	3.29553e-05	Y	Y	29.5782	29.3688	31.3602	40.2471	20.9963	22.4539	7.76044	7.28962	4.50649
ENSG00000278552	ENSG00000278552	abhydrolase domain containing 17A (ABHD17A) pseudogene		19.823	2.26552	2.5845	0.000100243	19.2453	2.26552	2.54668	0.000128882	Y	Y	11.3762	25.453	20.9068	19.5797	13.6932	26.1962	1.10863	2.08275	3.60519
ENSG00000278384	ENSG00000278384			15.5508	0.369545	2.98036	0.000106458	16.2248	0.369545	3.05682	9.1908e-05	Y	Y	18.202	15.6634	14.809	15.2286	15.519	15.9048	1.10863	0	0
ENSG00000126882	ENSG00000126882	family with sequence similarity 78 member A [Source:HGNC Symbol;Acc:HGNC:25465]	FAM78A	31.4642	75.1827	-2.06798	0.0001101	25.5668	75.1827	-2.4013	2.93141e-06	Y	Y	19.3396	22.5161	34.8447	31.545	31.038	31.8097	62.0835	89.5582	73.9064
ENSG00000152578	ENSG00000152578	glutamate ionotropic receptor AMPA type subunit 4 [Source:HGNC Symbol;Acc:HGNC:4574]	GRIA4	17.2979	3.07373	2.341	0.000110962	63.3574	3.07373	6.73187	1.05415e-13	Y	Y	59.1565	73.4221	57.4937	19.5797	17.3448	14.9693	4.43454	2.08275	2.70389
ENSG00000174236	ENSG00000174236	RAB15 effector protein [Source:HGNC Symbol;Acc:HGNC:33748]	REP15	7.93887	34.909	-2.54474	0.000120519	12.0445	34.909	-2.04874	0.00468526	Y	Y	12.5139	8.81065	14.809	4.35104	7.30306	12.1625	22.1727	37.4895	45.0649
ENSG00000126860	ENSG00000126860	ecotropic viral integration site 2A [Source:HGNC Symbol;Acc:HGNC:3499]	EVI2A	53.9906	137.398	-2.14639	0.00012195	24.9504	137.398	-3.77222	7.32821e-12	Y	Y	29.5782	23.4951	21.7779	76.1432	47.4699	38.3587	200.663	105.179	106.353
ENSG00000165471	ENSG00000165471	mannose binding lectin 2 [Source:HGNC Symbol;Acc:HGNC:6922]	MBL2	21.3597	4.1151	2.45715	0.000126086	25.2646	4.1151	2.79294	1.64012e-05	Y	Y	26.1654	23.4951	26.1335	26.1062	15.519	22.4539	4.43454	5.20687	2.70389
ENSG00000160886	ENSG00000160886	lymphocyte antigen 6 family member K [Source:HGNC Symbol;Acc:HGNC:24225]	LY6K	28.721	69.6751	-2.08146	0.000126884	23.8149	69.6751	-2.40785	4.05143e-06	Y	Y	23.8901	28.3899	19.1646	27.194	36.5153	22.4539	58.7576	71.8548	78.4129
ENSG00000197696	ENSG00000197696	neuromedin B [Source:HGNC Symbol;Acc:HGNC:7842]	NMB	45.595	16.9676	2.11729	0.000133757	56.5769	16.9676	2.52422	1.76223e-06	Y	Y	69.3951	56.7797	43.5559	42.4226	42.9055	51.4568	14.4122	16.662	19.8285
ENSG00000138769	ENSG00000138769	cyclin dependent kinase like 2 [Source:HGNC Symbol;Acc:HGNC:1782]	CDKL2	0.362587	18.6826	-3.19781	0.000144961	0	18.6826	-3.33245	7.16188e-06	Y	Y	0	0	0	1.08776	0	0	11.0863	26.0344	18.9273
ENSG00000266278	ENSG00000266278	long intergenic non-protein coding RNA 1910 [Source:HGNC Symbol;Acc:HGNC:52729]	LINC01910	33.2846	9.66169	2.29982	0.000145783	37.4979	9.66169	2.51908	2.54582e-05	Y	Y	31.8535	44.0532	36.5869	23.9307	31.9509	43.9722	13.3036	9.37237	6.30908
ENSG00000102043	ENSG00000102043	myotubularin related protein 8 [Source:HGNC Symbol;Acc:HGNC:16825]	MTMR8	88.8397	36.848	2.12266	0.000151351	0	36.848	-5.53962	3.31417e-09	Y		0	0	0	88.1085	86.7238	91.6867	26.6072	34.3654	49.5714
ENSG00000278872	ENSG00000278872	novel transcript		62.4212	25.4273	2.042	0.000153529	70.0443	25.4273	2.2543	1.34047e-05	Y	Y	50.0555	93.0013	67.076	52.2125	62.076	72.9751	24.3899	23.9516	27.9402
ENSG00000172602	ENSG00000172602	Rho family GTPase 1 [Source:HGNC Symbol;Acc:HGNC:18314]	RND1	60.7683	23.6022	2.08422	0.000157953	63.2465	23.6022	2.15903	7.35672e-05	Y	Y	76.2208	49.927	63.5916	82.6697	56.5987	43.0366	23.2813	24.993	22.5324
ENSG00000183508	ENSG00000183508	terminal nucleotidyltransferase 5C [Source:HGNC Symbol;Acc:HGNC:24712]	TENT5C	30.4553	76.8872	-2.12146	0.000158149	23.1484	76.8872	-2.61597	1.07561e-06	Y	Y	32.9911	22.5161	13.9379	36.9838	32.8638	21.5183	78.713	84.3513	67.5973
ENSG00000266976	ENSG00000266976	uncharacterized LOC102724908 [Source:NCBI gene;Acc:102724908]		19.3363	2.31222	2.5192	0.000163125	16.8384	2.31222	2.31502	0.000507902	Y	Y	7.96337	22.5161	20.0357	16.3164	16.4319	25.2606	1.10863	3.12412	2.70389
ENSG00000086570	ENSG00000086570	FAT atypical cadherin 2 [Source:HGNC Symbol;Acc:HGNC:3596]	FAT2	18.7913	51.2044	-2.18991	0.000170273	16.7336	51.2044	-2.37365	3.36657e-05	Y	Y	18.202	13.7055	18.2935	18.4919	19.1705	18.7116	56.5403	58.317	38.7558
ENSG00000183873	ENSG00000183873	sodium voltage-gated channel alpha subunit 5 [Source:HGNC Symbol;Acc:HGNC:10593]	SCN5A	6.47569	38.6564	-2.769	0.000173479	2.11659	38.6564	-3.81647	5.41503e-07	Y	Y	3.41287	2.93688	0	5.4388	1.82576	12.1625	23.2813	45.8205	46.8675
ENSG00000197360	ENSG00000197360	zinc finger protein 98 [Source:HGNC Symbol;Acc:HGNC:13174]	ZNF98	13.5933	0.347125	2.66001	0.000179778	31.7582	0.347125	4.88993	1.93118e-06	Y	Y	36.404	36.2216	22.649	13.0531	13.6932	14.0337	0	1.04137	0
ENSG00000166448	ENSG00000166448	transmembrane protein 130 [Source:HGNC Symbol;Acc:HGNC:25429]	TMEM130	28.3177	74.3724	-2.1749	0.000181995	15.7477	74.3724	-3.26555	8.1494e-09	Y	Y	22.7525	8.81065	15.6801	36.9838	27.3865	20.5827	57.649	84.3513	81.1168
ENSG00000101331	ENSG00000101331	CCM2 like scaffold protein [Source:HGNC Symbol;Acc:HGNC:16153]	CCM2L	811.094	294.056	2.1281	0.000198641	1223.3	294.056	2.93134	6.25886e-08	Y	Y	1453.88	1106.23	1109.8	1145.41	769.56	518.31	337.025	354.067	191.075
ENSG00000223552	ENSG00000223552	uncharacterized LOC102724297 [Source:NCBI gene;Acc:102724297]		4.83541	26.26	-2.65579	0.000198958	4.54048	26.26	-2.75378	0.000112206	Y	Y	7.96337	3.91584	1.74223	4.35104	5.47729	4.67789	29.9331	28.1171	20.7298
ENSG00000283646	ENSG00000283646	long intergenic non-protein coding RNA 2009 [Source:HGNC Symbol;Acc:HGNC:52845]	LINC02009	5.47959	31.9224	-2.68312	0.000214371	3.54458	31.9224	-3.13236	1.29905e-05	Y	Y	6.82575	2.93688	0.871117	5.4388	9.12882	1.87116	39.9108	33.324	22.5324
ENSG00000258472	ENSG00000258472	novel protein		49.3244	19.4871	2.05814	0.0002285	49.6872	19.4871	2.06466	0.000226312	Y	Y	56.8812	46.0112	46.1692	47.8614	37.4282	62.6837	18.8468	19.7861	19.8285
ENSG00000166035	ENSG00000166035	lipase C, hepatic type [Source:HGNC Symbol;Acc:HGNC:6619]	LIPC	43.465	100.236	-2.01287	0.000230798	25.8125	100.236	-3.00169	4.20428e-09	Y	Y	36.404	16.6423	24.3913	55.4757	34.6895	40.2299	108.646	114.551	77.5116
ENSG00000182389	ENSG00000182389	calcium voltage-gated channel auxiliary subunit beta 4 [Source:HGNC Symbol;Acc:HGNC:1404]	CACNB4	17.45	2.42617	2.46908	0.000255825	15.7519	2.42617	2.29005	0.000685649	Y	Y	18.202	18.6003	10.4534	16.3164	18.2576	17.776	4.43454	1.04137	1.8026
ENSG00000259495	ENSG00000259495	novel transcript		35.5898	9.43193	2.23269	0.000269454	59.0716	9.43193	3.26254	1.12458e-07	Y	Y	88.7347	44.0532	44.427	53.3002	31.9509	21.5183	8.86907	10.4137	9.01298
ENSG00000244675	ENSG00000244675	novel transcript, sense overlapping to ATP13A3		13.1877	39.0191	-2.25853	0.000292297	11.1036	39.0191	-2.49357	4.82774e-05	Y	Y	10.2386	11.7475	11.3245	17.4042	11.8675	10.2914	39.9108	37.4895	39.6571
ENSG00000189184	ENSG00000189184	protocadherin 18 [Source:HGNC Symbol;Acc:HGNC:14268]	PCDH18	2.61679	21.1502	-2.83256	0.000298361	0.32632	21.1502	-3.669	3.98624e-05	Y	Y	0	0.978961	0	3.26328	3.65153	0.935578	25.4986	20.8275	17.1247
ENSG00000218803	ENSG00000218803	glutathione S-transferase mu 2 pseudogene 1 [Source:HGNC Symbol;Acc:HGNC:38009]	GSTM2P1	8.92524	32.2914	-2.41154	0.000299431	7.65783	32.2914	-2.60769	8.08698e-05	Y	Y	10.2386	4.8948	7.84005	11.9654	6.39017	8.4202	34.3676	29.1585	33.348
ENSG00000278962	ENSG00000278962	TEC		80.9565	30.0763	2.07594	0.000307797	121.711	30.0763	2.88603	8.67312e-08	Y	Y	168.368	101.812	94.9518	128.356	60.2502	54.2635	28.8245	34.3654	27.0389
ENSG00000265666	ENSG00000265666	RARA antisense RNA 1 [Source:HGNC Symbol;Acc:HGNC:49577]	RARA-AS1	53.2578	20.7828	2.04892	0.00032557	68.1343	20.7828	2.51354	2.65807e-06	Y	Y	80.7713	62.6535	60.9782	67.4411	49.2956	43.0366	25.4986	26.0344	10.8156
ENSG00000259823	ENSG00000259823	LY6/PLAUR domain containing 8 [Source:HGNC Symbol;Acc:HGNC:44208]	LYPD8	0.362587	15.8595	-2.74572	0.000344258	1.35817	15.8595	-2.44842	0.00188869	Y	Y	1.13762	2.93688	0	1.08776	0	0	17.7381	20.8275	9.01298
ENSG00000183638	ENSG00000183638	RP1 like 1 [Source:HGNC Symbol;Acc:HGNC:15946]	RP1L1	5.46669	25.2872	-2.50709	0.000359467	5.76179	25.2872	-2.43933	0.000604921	Y	Y	4.5505	4.8948	7.84005	4.35104	4.56441	7.48463	24.3899	20.8275	30.6441
ENSG00000138650	ENSG00000138650	protocadherin 10 [Source:HGNC Symbol;Acc:HGNC:13404]	PCDH10	1.89919	18.3769	-2.78888	0.000363509	0.943013	18.3769	-3.11087	0.000163923	Y	Y	0	1.95792	0.871117	1.08776	2.73865	1.87116	21.064	18.7447	15.3221
ENSG00000009694	ENSG00000009694	teneurin transmembrane protein 1 [Source:HGNC Symbol;Acc:HGNC:8117]	TENM1	1.33376	20.343	-2.80377	0.000388246	0	20.343	-3.23674	5.19574e-06	Y	Y	0	0	0	2.17552	1.82576	0	9.9777	17.7034	33.348
ENSG00000133110	ENSG00000133110	periostin [Source:HGNC Symbol;Acc:HGNC:16953]	POSTN	46.3351	120.441	-2.11308	0.000398189	24.2511	120.441	-3.34725	2.96806e-09	Y	Y	21.6149	37.2005	13.9379	25.0185	43.8183	70.1684	109.755	128.089	123.478
ENSG00000118402	ENSG00000118402	ELOVL fatty acid elongase 4 [Source:HGNC Symbol;Acc:HGNC:14415]	ELOVL4	66.5671	28.0835	2.07784	0.000400526	3.69323	28.0835	-3.13755	2.56113e-07	Y		4.5505	3.91584	2.61335	68.5289	67.5533	63.6193	36.5849	26.0344	21.6311
ENSG00000271181	ENSG00000271181	stathmin-like 3 (STMN3) pseudogene		16.0959	1.31753	2.37399	0.000410426	16.3088	1.31753	2.3914	0.000399563	Y	Y	21.6149	18.6003	8.71117	26.1062	10.9546	11.2269	1.10863	1.04137	1.8026
ENSG00000090661	ENSG00000090661	ceramide synthase 4 [Source:HGNC Symbol;Acc:HGNC:23747]	CERS4	0.304294	15.1444	-2.81385	0.00045615	0	15.1444	-2.92487	2.88353e-05	Y	Y	0	0	0	0	0.912882	0	11.0863	20.8275	13.5195
ENSG00000128045	ENSG00000128045	RAS like family 11 member B [Source:HGNC Symbol;Acc:HGNC:23804]	RASL11B	5.77862	29.5853	-2.66606	0.00048164	0	29.5853	-4.55819	1.07952e-07	Y	Y	0	0	0	10.8776	3.65153	2.80673	33.259	23.9516	31.5454
ENSG00000172817	ENSG00000172817	cytochrome P450 family 7 subfamily B member 1 [Source:HGNC Symbol;Acc:HGNC:2652]	CYP7B1	12.2293	0.347125	2.51185	0.000494074	9.61575	0.347125	2.17096	0.00149637	Y	Y	10.2386	10.7686	7.84005	10.8776	15.519	10.2914	0	1.04137	0
ENSG00000159556	ENSG00000159556	ISL LIM homeobox 2 [Source:HGNC Symbol;Acc:HGNC:18524]	ISL2	13.5933	2.10332	2.2355	0.000514974	35.989	2.10332	4.65462	1.45362e-08	Y	Y	35.2664	35.2426	37.458	13.0531	13.6932	14.0337	3.3259	2.08275	0.901298
ENSG00000205403	ENSG00000205403	complement factor I [Source:HGNC Symbol;Acc:HGNC:5394]	CFI	0.311859	14.2898	-2.69561	0.000551261	0.616693	14.2898	-2.58581	0.00182802	Y	Y	0	0.978961	0.871117	0	0	0.935578	11.0863	21.8689	9.91427
ENSG00000203930	ENSG00000203930	long intergenic non-protein coding RNA 632 [Source:HGNC Symbol;Acc:HGNC:27865]	LINC00632	38.541	15.0753	2.00835	0.000553545	49.8787	15.0753	2.4983	3.89665e-06	Y	Y	50.0555	49.927	49.6537	43.5104	34.6895	37.4231	9.9777	20.8275	14.4208
ENSG00000112852	ENSG00000112852	protocadherin beta 2 [Source:HGNC Symbol;Acc:HGNC:8687]	PCDHB2	39.7324	13.4104	2.10209	0.000559283	49.6284	13.4104	2.50702	1.65919e-05	Y	Y	45.505	60.6956	42.6847	41.3349	29.2122	48.6501	5.54317	16.662	18.026
ENSG00000226374	ENSG00000226374	long intergenic non-protein coding RNA 1345 [Source:HGNC Symbol;Acc:HGNC:50564]	LINC01345	8.31659	32.8443	-2.37931	0.000569599	7.37438	32.8443	-2.51406	0.000238617	Y	Y	5.68812	6.85273	9.58229	5.4388	5.47729	14.0337	43.2367	29.1585	26.1376
ENSG00000123243	ENSG00000123243	inter-alpha-trypsin inhibitor heavy chain family member 5 [Source:HGNC Symbol;Acc:HGNC:21449]	ITIH5	39.5326	14.0118	2.09786	0.000582273	38.5428	14.0118	2.04843	0.000953207	Y	Y	48.9178	36.2216	30.4891	45.6859	40.1668	32.7452	12.195	20.8275	9.01298
ENSG00000228201	ENSG00000228201	uncharacterized LOC105371038 [Source:NCBI gene;Acc:105371038]		2.26177	18.1251	-2.52966	0.000605444	3.67422	18.1251	-2.2212	0.00439278	Y	Y	5.68812	0.978961	4.35559	2.17552	2.73865	1.87116	18.8468	22.9102	12.6182
ENSG00000185052	ENSG00000185052	solute carrier family 24 member 3 [Source:HGNC Symbol;Acc:HGNC:10977]	SLC24A3	3.09597	20.4818	-2.51511	0.000607485	3.67629	20.4818	-2.37385	0.00164892	Y	Y	3.41287	5.87376	1.74223	6.52656	1.82576	0.935578	18.8468	21.8689	20.7298
ENSG00000187185	ENSG00000187185	uncharacterized LOC388282 [Source:NCBI gene;Acc:388282]		14.1663	42.2802	-2.21198	0.000623499	9.52691	42.2802	-2.80048	7.07842e-06	Y	Y	9.10099	10.7686	8.71117	11.9654	13.6932	16.8404	50.9972	47.9032	27.9402
ENSG00000148344	ENSG00000148344	prostaglandin E synthase [Source:HGNC Symbol;Acc:HGNC:9599]	PTGES	80.1281	30.9059	2.03978	0.000634889	80.7758	30.9059	2.05037	0.00060678	Y	Y	92.1476	82.2327	67.9471	89.1963	90.3753	60.8126	45.454	36.4481	10.8156
ENSG00000127533	ENSG00000127533	F2R like thrombin or trypsin receptor 3 [Source:HGNC Symbol;Acc:HGNC:3540]	F2RL3	10.8395	45.6735	-2.40806	0.000638772	7.4314	45.6735	-2.84601	2.8189e-05	Y	Y	2.27525	15.6634	4.35559	6.52656	8.21594	17.776	42.1281	35.4067	59.4856
ENSG00000105696	ENSG00000105696	transmembrane protein 59 like [Source:HGNC Symbol;Acc:HGNC:13237]	TMEM59L	30.07	10.1001	2.04934	0.000666346	68.4945	10.1001	3.99923	4.63853e-11	Y	Y	83.0466	59.7166	62.7204	35.8961	35.6024	18.7116	12.195	7.28962	10.8156
ENSG00000168913	ENSG00000168913	energy homeostasis associated [Source:HGNC Symbol;Acc:HGNC:24838]	ENHO	4.53868	21.1033	-2.40711	0.000676346	6.50326	21.1033	-2.05452	0.00730563	Y	Y	5.68812	6.85273	6.96894	4.35104	3.65153	5.61347	22.1727	17.7034	23.4337
ENSG00000156299	ENSG00000156299	T cell lymphoma invasion and metastasis 1 [Source:HGNC Symbol;Acc:HGNC:11805]	TIAM1	16.0784	3.098	2.18735	0.000759676	29.1307	3.098	3.32565	1.43897e-06	Y	Y	35.2664	30.3478	21.7779	14.1409	20.9963	13.0981	3.3259	4.1655	1.8026
ENSG00000226088	ENSG00000226088	novel transcript		0.674446	15.4673	-2.76225	0.000795413	1.25033	15.4673	-2.56166	0.00127125	Y	Y	1.13762	0	2.61335	1.08776	0	0.935578	12.195	19.7861	14.4208
ENSG00000166979	ENSG00000166979	eva-1 homolog C [Source:HGNC Symbol;Acc:HGNC:13239]	EVA1C	12.2142	0.647557	2.38641	0.000819635	33.7718	0.647557	4.91663	2.23108e-06	Y	Y	37.5416	33.2847	30.4891	10.8776	17.3448	8.4202	0	1.04137	0.901298
ENSG00000178498	ENSG00000178498	deltex E3 ubiquitin ligase 3 [Source:HGNC Symbol;Acc:HGNC:24457]	DTX3	14.7848	2.31222	2.17107	0.000830678	29.6634	2.31222	3.53704	9.30291e-07	Y	Y	31.8535	28.3899	28.7469	17.4042	7.30306	19.6471	1.10863	3.12412	2.70389
ENSG00000223511	ENSG00000223511	novel transcript		53.126	21.8927	2.04706	0.000878098	6.99031	21.8927	-2.03224	0.00114399	Y		6.82575	9.78961	4.35559	58.739	53.86	46.7789	19.9554	24.993	20.7298
ENSG00000109063	ENSG00000109063	myosin heavy chain 3 [Source:HGNC Symbol;Acc:HGNC:7573]	MYH3	30.0872	10.6785	2.0325	0.000889459	47.9637	10.6785	2.95797	2.68246e-07	Y	Y	45.505	46.9901	51.3959	21.7552	29.2122	39.2943	11.0863	8.33099	12.6182
ENSG00000260862	ENSG00000260862	uncharacterized LOC101928446 [Source:NCBI gene;Acc:101928446]		31.7761	11.6956	2.03796	0.000892522	33.5074	11.6956	2.1259	0.000436591	Y	Y	31.8535	38.1795	30.4891	31.545	31.038	32.7452	12.195	9.37237	13.5195
ENSG00000260398	ENSG00000260398	novel transcript, overlapping to PKIA		26.3094	8.04528	2.12817	0.000980472	26.3294	8.04528	2.14306	0.000944379	Y	Y	17.0644	32.3057	29.618	27.194	26.4736	25.2606	6.6518	9.37237	8.11168
ENSG00000196502	ENSG00000196502	sulfotransferase family 1A member 1 [Source:HGNC Symbol;Acc:HGNC:11453]	SULT1A1	10.5557	38.7008	-2.35045	0.00100998	3.4198	38.7008	-3.73097	2.14032e-07	Y	Y	5.68812	1.95792	2.61335	14.1409	10.0417	7.48463	44.3454	51.0273	20.7298
ENSG00000074219	ENSG00000074219	TEA domain transcription factor 2 [Source:HGNC Symbol;Acc:HGNC:11715]	TEAD2	2.00821	17.0386	-2.57532	0.00101344	0.580745	17.0386	-3.00387	0.000425949	Y	Y	0	0	1.74223	3.26328	1.82576	0.935578	13.3036	19.7861	18.026
ENSG00000267278	ENSG00000267278	MAP3K14 antisense RNA 1 [Source:HGNC Symbol;Acc:HGNC:44359]	MAP3K14-AS1	32.0525	10.5403	2.09072	0.00101629	30.5753	10.5403	2.02994	0.00177669	Y	Y	29.5782	26.4319	35.7158	43.5104	27.3865	25.2606	8.86907	8.33099	14.4208
ENSG00000139329	ENSG00000139329	lumican [Source:HGNC Symbol;Acc:HGNC:6724]	LUM	57.2892	23.1894	2.05784	0.0010726	4.76588	23.1894	-2.44298	4.61735e-05	Y		3.41287	3.91584	6.96894	60.9145	52.9472	58.0058	14.4122	28.1171	27.0389
ENSG00000185467	ENSG00000185467	karyopherin subunit alpha 7 [Source:HGNC Symbol;Acc:HGNC:21839]	KPNA7	16.4865	2.68176	2.12943	0.00107445	26.8026	2.68176	2.94909	1.29107e-05	Y	Y	27.303	31.3267	21.7779	28.2817	13.6932	7.48463	2.21727	3.12412	2.70389
ENSG00000130751	ENSG00000130751	neuronal PAS domain protein 1 [Source:HGNC Symbol;Acc:HGNC:7894]	NPAS1	25.0619	8.16109	2.08587	0.00107861	29.7761	8.16109	2.37916	0.000116083	Y	Y	29.5782	28.3899	31.3602	20.6674	27.3865	27.1318	7.76044	10.4137	6.30908
ENSG00000116771	ENSG00000116771	agmatinase [Source:HGNC Symbol;Acc:HGNC:18407]	AGMAT	15.9513	3.42085	2.0853	0.00107966	41.9025	3.42085	4.30998	4.94205e-09	Y	Y	47.7802	35.2426	42.6847	22.843	10.0417	14.9693	4.43454	3.12412	2.70389
ENSG00000165323	ENSG00000165323	FAT atypical cadherin 3 [Source:HGNC Symbol;Acc:HGNC:23112]	FAT3	2.01577	16.5012	-2.49999	0.00108763	1.66548	16.5012	-2.58557	0.000762706	Y	Y	2.27525	0.978961	1.74223	3.26328	0.912882	1.87116	21.064	10.4137	18.026
ENSG00000234617	ENSG00000234617	SNRK antisense RNA 1 [Source:HGNC Symbol;Acc:HGNC:41269]	SNRK-AS1	1.65319	14.6332	-2.46154	0.001092	2.95175	14.6332	-2.13751	0.00790881	Y	Y	3.41287	1.95792	3.48447	2.17552	0.912882	1.87116	15.5209	16.662	11.7169
ENSG00000087116	ENSG00000087116	ADAM metallopeptidase with thrombospondin type 1 motif 2 [Source:HGNC Symbol;Acc:HGNC:218]	ADAMTS2	2.47218	19.4405	-2.45016	0.00118245	2.16947	19.4405	-2.55399	0.000614722	Y	Y	4.5505	1.95792	0	0	2.73865	4.67789	18.8468	18.7447	20.7298
ENSG00000153064	ENSG00000153064	B cell scaffold protein with ankyrin repeats 1 [Source:HGNC Symbol;Acc:HGNC:18233]	BANK1	11.8388	2.05848	2.00521	0.00118618	76.4794	2.05848	8.8742	3.03149e-14	Y	Y	68.2575	79.2958	81.885	15.2286	11.8675	8.4202	1.10863	4.1655	0.901298
ENSG00000062038	ENSG00000062038	cadherin 3 [Source:HGNC Symbol;Acc:HGNC:1762]	CDH3	1.08776	15.8801	-2.48814	0.00120864	0.907065	15.8801	-2.50741	0.00130255	Y	Y	0	0.978961	1.74223	3.26328	0	0	21.064	16.662	9.91427
ENSG00000283217	ENSG00000283217	novel transcript		13.37	1.66466	2.25393	0.00122995	11.7562	1.66466	2.08606	0.00295586	Y	Y	10.2386	13.7055	11.3245	14.1409	9.12882	16.8404	1.10863	2.08275	1.8026
ENSG00000140481	ENSG00000140481	coiled-coil domain containing 33 [Source:HGNC Symbol;Acc:HGNC:26552]	CCDC33	0.362587	12.8098	-2.45897	0.00123996	0	12.8098	-2.56247	0.000103403	Y	Y	0	0	0	1.08776	0	0	8.86907	18.7447	10.8156
ENSG00000138759	ENSG00000138759	Fraser extracellular matrix complex subunit 1 [Source:HGNC Symbol;Acc:HGNC:19185]	FRAS1	0	8.64615	-2.00901	0.00132862	0	8.64615	-2.00611	0.0014806	Y	Y	0	0	0	0	0	0	6.6518	9.37237	9.91427
ENSG00000112539	ENSG00000112539	chromosome 6 open reading frame 118 [Source:HGNC Symbol;Acc:HGNC:21233]	C6orf118	16.9656	4.04599	2.10321	0.00147622	26.7047	4.04599	2.9186	1.0038e-05	Y	Y	32.9911	24.474	22.649	18.4919	13.6932	18.7116	3.3259	5.20687	3.60519
ENSG00000269220	ENSG00000269220	long intergenic non-protein coding RNA 528 [Source:HGNC Symbol;Acc:HGNC:26875]	LINC00528	8.13421	30.1509	-2.28724	0.00152671	4.48759	30.1509	-2.968	1.81985e-05	Y	Y	6.82575	4.8948	1.74223	8.70208	8.21594	7.48463	23.2813	43.7377	23.4337
ENSG00000236824	ENSG00000236824	brain cytoplasmic RNA 1 [Source:HGNC Symbol;Acc:HGNC:1022]	BCYRN1	9.65568	30.7407	-2.16426	0.00155965	9.8771	30.7407	-2.12271	0.00230564	Y	Y	5.68812	11.7475	12.1956	8.70208	12.7803	7.48463	36.5849	24.993	30.6441
ENSG00000174672	ENSG00000174672	BR serine/threonine kinase 2 [Source:HGNC Symbol;Acc:HGNC:11405]	BRSK2	16.7983	43.2983	-2.03356	0.00163798	14.9313	43.2983	-2.16399	0.000608252	Y	Y	11.3762	10.7686	22.649	21.7552	14.6061	14.0337	39.9108	45.8205	44.1636
ENSG00000123700	ENSG00000123700	potassium voltage-gated channel subfamily J member 2 [Source:HGNC Symbol;Acc:HGNC:6263]	KCNJ2	11.4178	1.24842	2.06579	0.00188497	24.3355	1.24842	3.36882	9.17319e-06	Y	Y	17.0644	25.453	30.4891	6.52656	13.6932	14.0337	0	1.04137	2.70389
ENSG00000165124	ENSG00000165124	sushi, von Willebrand factor type A, EGF and pentraxin domain containing 1 [Source:HGNC Symbol;Acc:HGNC:15985]	SVEP1	23.0841	6.75017	2.06899	0.00203627	23.9476	6.75017	2.11784	0.00154855	Y	Y	32.9911	20.5582	18.2935	30.4573	20.0834	18.7116	6.6518	7.28962	6.30908
ENSG00000153283	ENSG00000153283	CD96 molecule [Source:HGNC Symbol;Acc:HGNC:16892]	CD96	16.0936	2.81999	2.09788	0.00212336	15.1549	2.81999	2.02478	0.00342944	Y	Y	19.3396	7.83169	18.2935	20.6674	18.2576	9.35578	4.43454	3.12412	0.901298
ENSG00000263812	ENSG00000263812	long intergenic non-protein coding RNA 908 [Source:HGNC Symbol;Acc:HGNC:27599]	LINC00908	9.19171	0.369545	2.01869	0.00218897	11.1395	0.369545	2.24191	0.00106835	Y	Y	10.2386	12.7265	10.4534	11.9654	11.8675	3.74231	1.10863	0	0
ENSG00000120915	ENSG00000120915	epoxide hydrolase 2 [Source:HGNC Symbol;Acc:HGNC:3402]	EPHX2	9.39685	29.6806	-2.14959	0.00298515	4.99644	29.6806	-2.86413	2.61239e-05	Y	Y	6.82575	2.93688	5.2267	15.2286	5.47729	7.48463	31.0417	29.1585	28.8415
ENSG00000169744	ENSG00000169744	LIM domain binding 2 [Source:HGNC Symbol;Acc:HGNC:6533]	LDB2	2.19592	16.5479	-2.35484	0.00304996	0.290372	16.5479	-2.90771	0.000230379	Y	Y	0	0	0.871117	1.08776	4.56441	0.935578	21.064	11.4551	17.1247
ENSG00000136378	ENSG00000136378	ADAM metallopeptidase with thrombospondin type 1 motif 7 [Source:HGNC Symbol;Acc:HGNC:223]	ADAMTS7	0.674446	11.1676	-2.29913	0.00417498	0.995901	11.1676	-2.20381	0.00616645	Y	Y	1.13762	0.978961	0.871117	1.08776	0	0.935578	8.86907	15.6206	9.01298
ENSG00000172350	ENSG00000172350	ATP binding cassette subfamily G member 4 [Source:HGNC Symbol;Acc:HGNC:13884]	ABCG4	3.82107	17.0834	-2.15635	0.00510529	3.31402	17.0834	-2.26735	0.00266967	Y	Y	3.41287	3.91584	2.61335	2.17552	2.73865	6.54905	15.5209	17.7034	18.026
ENSG00000011201	ENSG00000011201	anosmin 1 [Source:HGNC Symbol;Acc:HGNC:6211]	ANOS1	0.362587	9.27129	-2.02333	0.00611312	0	9.27129	-2.10741	0.000787083	Y	Y	0	0	0	1.08776	0	0	5.54317	11.4551	10.8156
ENSG00000249378	ENSG00000249378	long intergenic non-protein coding RNA 1060 [Source:HGNC Symbol;Acc:HGNC:49081]	LINC01060	0.666881	10.8877	-2.2264	0.00638411	0	10.8877	-2.41934	0.000193948	Y	Y	0	0	0	1.08776	0.912882	0	12.195	11.4551	9.01298
ENSG00000171885	ENSG00000171885	aquaporin 4 [Source:HGNC Symbol;Acc:HGNC:637]	AQP4	1.03703	11.7669	-2.13966	0.00684628	0.290372	11.7669	-2.31773	0.00179107	Y	Y	0	0	0.871117	2.17552	0	0.935578	14.4122	14.5792	6.30908
ENSG00000184838	ENSG00000184838	proline rich 16 [Source:HGNC Symbol;Acc:HGNC:29654]	PRR16	1.96505	13.7058	-2.194	0.00718605	0	13.7058	-2.76133	3.39384e-05	Y	Y	0	0	0	2.17552	0.912882	2.80673	18.8468	11.4551	10.8156
ENSG00000039068	ENSG00000039068	cadherin 1 [Source:HGNC Symbol;Acc:HGNC:1748]	CDH1	6.77776	23.8062	-2.03706	0.00748433	6.13407	23.8062	-2.14131	0.00386689	Y	Y	10.2386	2.93688	5.2267	6.52656	9.12882	4.67789	34.3676	20.8275	16.2234
ENSG00000124126	ENSG00000124126	phosphatidylinositol-3,4,5-trisphosphate dependent Rac exchange factor 1 [Source:HGNC Symbol;Acc:HGNC:32594]	PREX1	50.9431	19.0248	2.00849	0.00748733	3.11249	19.0248	-2.22681	0.000292197	Y		4.5505	3.91584	0.871117	71.7921	52.0343	29.0029	24.3899	21.8689	10.8156
ENSG00000078596	ENSG00000078596	integral membrane protein 2A [Source:HGNC Symbol;Acc:HGNC:6173]	ITM2A	1.84846	14.3098	-2.1149	0.00809245	0.652641	14.3098	-2.39568	0.00199048	Y	Y	0	1.95792	0	0	2.73865	2.80673	7.76044	13.5379	21.6311
ENSG00000103522	ENSG00000103522	interleukin 21 receptor [Source:HGNC Symbol;Acc:HGNC:6006]	IL21R	7.37878	28.9286	-2.1006	0.00813457	2.58949	28.9286	-2.89528	3.68214e-05	Y	Y	3.41287	0	4.35559	6.52656	11.8675	3.74231	19.9554	47.9032	18.9273
ENSG00000152611	ENSG00000152611	calcyphosine like [Source:HGNC Symbol;Acc:HGNC:28375]	CAPSL	1.91432	12.4123	-2.05011	0.0100058	1.55971	12.4123	-2.11952	0.00688094	Y	Y	0	2.93688	1.74223	1.08776	0.912882	3.74231	13.3036	10.4137	13.5195
ENSG00000158104	ENSG00000158104	4-hydroxyphenylpyruvate dioxygenase [Source:HGNC Symbol;Acc:HGNC:5147]	HPD	7.89571	25.1959	-2.01813	0.0105755	2.95175	25.1959	-2.93315	3.2692e-05	Y	Y	3.41287	1.95792	3.48447	3.26328	6.39017	14.0337	25.4986	23.9516	26.1376
